# Supplementary material
Source: publisher figshare collection journal article supplement (https://acs.figshare.com/ndownloader/files/3809509)
Supplement: Supplementary file 1 [file 3809509]

 
data_vbchem001_0m_a
 
_audit_creation_method            SHELXL-2014/6
_chemical_name_systematic         ?
_chemical_name_common             ?
_chemical_melting_point           ?
_chemical_formula_moiety          ?
_chemical_formula_sum
 'C23 H21 N O3 S' 
_chemical_formula_weight          391.47

loop_
 _atom_type_symbol
 _atom_type_description
 _atom_type_scat_dispersion_real
 _atom_type_scat_dispersion_imag
 _atom_type_scat_source
 'C'  'C'   0.0033   0.0016
 'International Tables Vol C Tables 4.2.6.8 and 6.1.1.4'
 'H'  'H'   0.0000   0.0000
 'International Tables Vol C Tables 4.2.6.8 and 6.1.1.4'
 'N'  'N'   0.0061   0.0033
 'International Tables Vol C Tables 4.2.6.8 and 6.1.1.4'
 'O'  'O'   0.0106   0.0060
 'International Tables Vol C Tables 4.2.6.8 and 6.1.1.4'
 'S'  'S'   0.1246   0.1234
 'International Tables Vol C Tables 4.2.6.8 and 6.1.1.4'
 
_space_group_crystal_system       monoclinic
_space_group_IT_number            14
_space_group_name_H-M_alt         'P 21/c'
_space_group_name_Hall            '-P 2ybc'
 
_shelx_space_group_comment
;
The symmetry employed for this shelxl refinement is uniquely defined
by the following loop, which should always be used as a source of
symmetry information in preference to the above space-group names.
They are only intended as comments.
;
 
loop_
 _space_group_symop_operation_xyz
 'x, y, z'
 '-x, y+1/2, -z+1/2'
 '-x, -y, -z'
 'x, -y-1/2, z-1/2'
 
_cell_length_a                    6.2816(3)
_cell_length_b                    28.4861(16)
_cell_length_c                    11.4483(6)
_cell_angle_alpha                 90
_cell_angle_beta                  102.171(3)
_cell_angle_gamma                 90
_cell_volume                      2002.49(18)
_cell_formula_units_Z             4
_cell_measurement_temperature     296(2)
_cell_measurement_reflns_used     ?
_cell_measurement_theta_min       ?
_cell_measurement_theta_max       ?
 
_exptl_crystal_description        ?
_exptl_crystal_colour             ?
_exptl_crystal_density_meas       ?
_exptl_crystal_density_method     ?
_exptl_crystal_density_diffrn     1.298          
_exptl_crystal_F_000              824
_exptl_transmission_factor_min    ?
_exptl_transmission_factor_max    ?
_exptl_crystal_size_max           ?
_exptl_crystal_size_mid           ?
_exptl_crystal_size_min           ?
_exptl_absorpt_coefficient_mu     0.185
_shelx_estimated_absorpt_T_min    ?
_shelx_estimated_absorpt_T_max    ?
_exptl_absorpt_correction_type    ?
_exptl_absorpt_correction_T_min   ?
_exptl_absorpt_correction_T_max   ?
_exptl_absorpt_process_details    ?
_exptl_absorpt_special_details    ?
_diffrn_ambient_temperature       296(2)
_diffrn_radiation_wavelength      0.71073
_diffrn_radiation_type            MoK\a
_diffrn_source                    ?
_diffrn_measurement_device_type   ?
_diffrn_measurement_method        ?
_diffrn_detector_area_resol_mean  ?
_diffrn_reflns_number             64321
_diffrn_reflns_av_unetI/netI      0.0232
_diffrn_reflns_av_R_equivalents   0.0482
_diffrn_reflns_limit_h_min        -8
_diffrn_reflns_limit_h_max        8
_diffrn_reflns_limit_k_min        -37
_diffrn_reflns_limit_k_max        37
_diffrn_reflns_limit_l_min        -15
_diffrn_reflns_limit_l_max        15
_diffrn_reflns_theta_min          1.430
_diffrn_reflns_theta_max          28.237
_diffrn_reflns_theta_full         25.242
_diffrn_measured_fraction_theta_max   0.993
_diffrn_measured_fraction_theta_full  0.999
_diffrn_reflns_Laue_measured_fraction_max    0.993
_diffrn_reflns_Laue_measured_fraction_full   0.999
_diffrn_reflns_point_group_measured_fraction_max   0.993
_diffrn_reflns_point_group_measured_fraction_full  0.999
_reflns_number_total              4922
_reflns_number_gt                 3949
_reflns_threshold_expression      'I > 2\s(I)'
_reflns_Friedel_coverage          0.000
_reflns_Friedel_fraction_max      .
_reflns_Friedel_fraction_full     .
 
_reflns_special_details
;
 Reflections were merged by SHELXL according to the crystal
 class for the calculation of statistics and refinement.
 
 _reflns_Friedel_fraction is defined as the number of unique
 Friedel pairs measured divided by the number that would be
 possible theoretically, ignoring centric projections and
 systematic absences.
;
 
_computing_data_collection        ?
_computing_cell_refinement        ?
_computing_data_reduction         ?
_computing_structure_solution     ?
_computing_structure_refinement 'SHELXL-2014/6 (Sheldrick, 2014)'
_computing_molecular_graphics     ?
_computing_publication_material   ?
_refine_special_details           ?
_refine_ls_structure_factor_coef  Fsqd
_refine_ls_matrix_type            full
_refine_ls_weighting_scheme       calc
_refine_ls_weighting_details
'w=1/[\s^2^(Fo^2^)+(0.1000P)^2^] where P=(Fo^2^+2Fc^2^)/3'
_atom_sites_solution_primary      ?
_atom_sites_solution_secondary    ?
_atom_sites_solution_hydrogens    geom
_refine_ls_hydrogen_treatment     constr
_refine_ls_extinction_method      none
_refine_ls_extinction_coef        .
_refine_ls_number_reflns          4922
_refine_ls_number_parameters      255
_refine_ls_number_restraints      0
_refine_ls_R_factor_all           0.0908
_refine_ls_R_factor_gt            0.0700
_refine_ls_wR_factor_ref          0.2397
_refine_ls_wR_factor_gt           0.2204
_refine_ls_goodness_of_fit_ref    1.801
_refine_ls_restrained_S_all       1.801
_refine_ls_shift/su_max           0.000
_refine_ls_shift/su_mean          0.000
 
loop_
 _atom_site_label
 _atom_site_type_symbol
 _atom_site_fract_x
 _atom_site_fract_y
 _atom_site_fract_z
 _atom_site_U_iso_or_equiv
 _atom_site_adp_type
 _atom_site_occupancy
 _atom_site_site_symmetry_order  
 _atom_site_calc_flag
 _atom_site_refinement_flags_posn
 _atom_site_refinement_flags_adp
 _atom_site_refinement_flags_occupancy
 _atom_site_disorder_assembly
 _atom_site_disorder_group
S001 S 0.88143(9) 0.37030(3) 0.52781(5) 0.0436(3) Uani 1 1 d . . . . .
O002 O 0.1869(3) 0.54431(7) 0.07629(18) 0.0529(5) Uani 1 1 d . . . . .
O003 O 1.0053(3) 0.41173(8) 0.56456(19) 0.0588(6) Uani 1 1 d . . . . .
N004 N 0.6794(3) 0.38560(7) 0.41758(17) 0.0337(5) Uani 1 1 d . . . . .
O005 O 0.9870(4) 0.33051(9) 0.4906(2) 0.0700(7) Uani 1 1 d . . . . .
C006 C 0.4929(3) 0.41989(8) 0.55990(19) 0.0286(5) Uani 1 1 d . . . . .
H006 H 0.4106 0.4445 0.5806 0.034 Uiso 1 1 calc R U . . .
C007 C 0.5707(3) 0.38419(8) 0.6490(2) 0.0318(5) Uani 1 1 d . . . . .
C008 C 0.4376(3) 0.45183(8) 0.35251(19) 0.0296(5) Uani 1 1 d . . . . .
C009 C 0.5328(3) 0.41952(7) 0.44940(19) 0.0281(5) Uani 1 1 d . . . . .
C00A C 0.5933(4) 0.35190(8) 0.3255(2) 0.0308(5) Uani 1 1 d . . . . .
C00B C 0.2359(4) 0.47289(8) 0.3483(2) 0.0334(5) Uani 1 1 d . . . . .
H00B H 0.1593 0.4658 0.4073 0.040 Uiso 1 1 calc R U . . .
C00C C 0.2603(4) 0.51452(8) 0.1695(2) 0.0378(6) Uani 1 1 d . . . . .
C00D C 0.3888(4) 0.33268(9) 0.3188(2) 0.0381(5) Uani 1 1 d . . . . .
H00D H 0.3057 0.3409 0.3740 0.046 Uiso 1 1 calc R U . . .
C00E C 0.5478(4) 0.46314(9) 0.2621(2) 0.0393(6) Uani 1 1 d . . . . .
H00E H 0.6826 0.4496 0.2626 0.047 Uiso 1 1 calc R U . . .
C00F C 0.1465(4) 0.50412(9) 0.2583(2) 0.0380(6) Uani 1 1 d . . . . .
H00F H 0.0120 0.5180 0.2573 0.046 Uiso 1 1 calc R U . . .
C00G C 0.7142(4) 0.33994(9) 0.2421(2) 0.0405(6) Uani 1 1 d . . . . .
H00G H 0.8501 0.3535 0.2457 0.049 Uiso 1 1 calc R U . . .
C00H C 0.7460(4) 0.35497(9) 0.6394(2) 0.0360(5) Uani 1 1 d . . . . .
C00I C 0.4282(5) 0.28793(9) 0.1449(3) 0.0468(6) Uani 1 1 d . . . . .
C00J C 0.4599(4) 0.49401(10) 0.1725(2) 0.0435(6) Uani 1 1 d . . . . .
H00J H 0.5360 0.5011 0.1134 0.052 Uiso 1 1 calc R U . . .
C00K C 0.3106(5) 0.30106(9) 0.2290(3) 0.0476(7) Uani 1 1 d . . . . .
H00K H 0.1734 0.2880 0.2247 0.057 Uiso 1 1 calc R U . . .
C00L C 0.4708(4) 0.37587(10) 0.7452(2) 0.0438(6) Uani 1 1 d . . . . .
H00L H 0.3576 0.3952 0.7567 0.053 Uiso 1 1 calc R U . . .
C00M C 0.6338(5) 0.30806(9) 0.1542(2) 0.0472(6) Uani 1 1 d . . . . .
H00M H 0.7178 0.2997 0.0996 0.057 Uiso 1 1 calc R U . . .
C00N C -0.0133(5) 0.56866(10) 0.0731(3) 0.0544(7) Uani 1 1 d . . . . .
H00A H -0.0041 0.5869 0.1456 0.065 Uiso 1 1 calc R U . . .
H00C H -0.1321 0.5464 0.0670 0.065 Uiso 1 1 calc R U . . .
C00O C 0.8114(5) 0.31790(10) 0.7171(3) 0.0517(7) Uani 1 1 d . . . . .
H00O H 0.9252 0.2984 0.7072 0.062 Uiso 1 1 calc R U . . .
C00P C 0.5375(5) 0.33964(12) 0.8227(3) 0.0575(8) Uani 1 1 d . . . . .
H00P H 0.4683 0.3347 0.8859 0.069 Uiso 1 1 calc R U . . .
C00Q C 0.7051(6) 0.31026(11) 0.8094(3) 0.0617(8) Uani 1 1 d . . . . .
H00Q H 0.7462 0.2855 0.8621 0.074 Uiso 1 1 calc R U . . .
C00R C -0.0522(7) 0.60044(12) -0.0337(3) 0.0725(10) Uani 1 1 d . . . . .
H00H H 0.0626 0.6233 -0.0249 0.109 Uiso 1 1 calc R U . . .
H00I H -0.1893 0.6162 -0.0400 0.109 Uiso 1 1 calc R U . . .
H00N H -0.0549 0.5822 -0.1045 0.109 Uiso 1 1 calc R U . . .
C00S C 0.3427(7) 0.25334(12) 0.0484(3) 0.0747(10) Uani 1 1 d . . . . .
H00R H 0.3268 0.2233 0.0833 0.112 Uiso 1 1 calc R U . . .
H00S H 0.4427 0.2508 -0.0042 0.112 Uiso 1 1 calc R U . . .
H00T H 0.2037 0.2637 0.0039 0.112 Uiso 1 1 calc R U . . .
 
loop_
 _atom_site_aniso_label
 _atom_site_aniso_U_11
 _atom_site_aniso_U_22
 _atom_site_aniso_U_33
 _atom_site_aniso_U_23
 _atom_site_aniso_U_13
 _atom_site_aniso_U_12
S001 0.0274(3) 0.0692(5) 0.0339(4) 0.0036(3) 0.0054(2) 0.0128(3)
O002 0.0615(12) 0.0556(12) 0.0403(10) 0.0211(9) 0.0075(9) -0.0005(9)
O003 0.0271(9) 0.0946(16) 0.0522(12) 0.0015(11) 0.0029(8) -0.0180(9)
N004 0.0284(9) 0.0441(11) 0.0284(10) -0.0006(8) 0.0057(7) 0.0078(8)
O005 0.0617(13) 0.0978(17) 0.0510(13) 0.0068(12) 0.0130(10) 0.0492(12)
C006 0.0236(10) 0.0349(11) 0.0281(11) -0.0008(9) 0.0073(8) -0.0015(8)
C007 0.0262(10) 0.0418(13) 0.0265(11) 0.0009(9) 0.0035(8) -0.0049(9)
C008 0.0288(10) 0.0324(11) 0.0278(11) 0.0008(9) 0.0062(8) -0.0032(8)
C009 0.0233(9) 0.0326(11) 0.0279(11) -0.0007(8) 0.0044(8) 0.0003(8)
C00A 0.0318(11) 0.0333(12) 0.0276(11) 0.0047(9) 0.0065(9) 0.0051(9)
C00B 0.0339(11) 0.0360(12) 0.0316(11) 0.0069(9) 0.0097(9) 0.0001(9)
C00C 0.0449(13) 0.0360(13) 0.0301(12) 0.0073(10) 0.0024(10) -0.0065(10)
C00D 0.0356(12) 0.0407(13) 0.0403(13) 0.0070(10) 0.0133(10) 0.0027(10)
C00E 0.0336(12) 0.0485(14) 0.0378(13) 0.0054(11) 0.0122(10) -0.0001(10)
C00F 0.0366(12) 0.0404(13) 0.0369(13) 0.0056(10) 0.0077(10) 0.0016(10)
C00G 0.0404(13) 0.0470(15) 0.0383(13) -0.0009(11) 0.0173(11) -0.0025(11)
C00H 0.0334(12) 0.0450(13) 0.0279(11) 0.0011(10) 0.0024(9) 0.0005(10)
C00I 0.0615(17) 0.0313(13) 0.0453(15) 0.0013(11) 0.0057(12) -0.0024(11)
C00J 0.0453(14) 0.0532(16) 0.0356(13) 0.0091(11) 0.0169(11) -0.0077(11)
C00K 0.0453(14) 0.0371(14) 0.0592(17) 0.0049(12) 0.0083(12) -0.0069(11)
C00L 0.0380(13) 0.0637(17) 0.0308(13) 0.0029(12) 0.0101(10) -0.0034(12)
C00M 0.0603(17) 0.0468(15) 0.0396(14) -0.0043(12) 0.0219(12) -0.0005(13)
C00N 0.0597(18) 0.0490(16) 0.0479(16) 0.0127(13) -0.0035(13) -0.0008(13)
C00O 0.0582(17) 0.0536(17) 0.0386(14) 0.0040(12) -0.0002(12) 0.0147(13)
C00P 0.0632(18) 0.075(2) 0.0359(14) 0.0140(14) 0.0148(13) -0.0052(16)
C00Q 0.080(2) 0.0578(19) 0.0429(16) 0.0181(14) 0.0036(15) 0.0021(16)
C00R 0.098(3) 0.0554(19) 0.0532(19) 0.0215(16) -0.0088(18) -0.0036(18)
C00S 0.097(3) 0.056(2) 0.067(2) -0.0173(17) 0.009(2) -0.0202(19)
 
_geom_special_details
;
 All esds (except the esd in the dihedral angle between two l.s. planes)
 are estimated using the full covariance matrix.  The cell esds are taken
 into account individually in the estimation of esds in distances, angles
 and torsion angles; correlations between esds in cell parameters are only
 used when they are defined by crystal symmetry.  An approximate (isotropic)
 treatment of cell esds is used for estimating esds involving l.s. planes.
;
 
loop_
 _geom_bond_atom_site_label_1
 _geom_bond_atom_site_label_2
 _geom_bond_distance
 _geom_bond_site_symmetry_2
 _geom_bond_publ_flag
S001 O005 1.423(2) . ?
S001 O003 1.427(2) . ?
S001 N004 1.648(2) . ?
S001 C00H 1.733(2) . ?
O002 C00C 1.365(3) . ?
O002 C00N 1.430(4) . ?
N004 C009 1.434(3) . ?
N004 C00A 1.444(3) . ?
C006 C009 1.341(3) . ?
C006 C007 1.451(3) . ?
C006 H006 0.9300 . ?
C007 C00L 1.398(3) . ?
C007 C00H 1.403(3) . ?
C008 C00B 1.394(3) . ?
C008 C00E 1.398(3) . ?
C008 C009 1.468(3) . ?
C00A C00G 1.382(3) . ?
C00A C00D 1.384(3) . ?
C00B C00F 1.388(3) . ?
C00B H00B 0.9300 . ?
C00C C00J 1.377(4) . ?
C00C C00F 1.392(3) . ?
C00D C00K 1.377(4) . ?
C00D H00D 0.9300 . ?
C00E C00J 1.375(3) . ?
C00E H00E 0.9300 . ?
C00F H00F 0.9300 . ?
C00G C00M 1.371(4) . ?
C00G H00G 0.9300 . ?
C00H C00O 1.386(4) . ?
C00I C00K 1.383(4) . ?
C00I C00M 1.396(4) . ?
C00I C00S 1.493(4) . ?
C00J H00J 0.9300 . ?
C00K H00K 0.9300 . ?
C00L C00P 1.368(4) . ?
C00L H00L 0.9300 . ?
C00M H00M 0.9300 . ?
C00N C00R 1.499(4) . ?
C00N H00A 0.9700 . ?
C00N H00C 0.9700 . ?
C00O C00Q 1.381(4) . ?
C00O H00O 0.9300 . ?
C00P C00Q 1.378(5) . ?
C00P H00P 0.9300 . ?
C00Q H00Q 0.9300 . ?
C00R H00H 0.9600 . ?
C00R H00I 0.9600 . ?
C00R H00N 0.9600 . ?
C00S H00R 0.9600 . ?
C00S H00S 0.9600 . ?
C00S H00T 0.9600 . ?
 
loop_
 _geom_angle_atom_site_label_1
 _geom_angle_atom_site_label_2
 _geom_angle_atom_site_label_3
 _geom_angle
 _geom_angle_site_symmetry_1
 _geom_angle_site_symmetry_3
 _geom_angle_publ_flag
O005 S001 O003 119.16(14) . . ?
O005 S001 N004 108.26(12) . . ?
O003 S001 N004 106.90(12) . . ?
O005 S001 C00H 110.63(14) . . ?
O003 S001 C00H 108.23(12) . . ?
N004 S001 C00H 102.27(10) . . ?
C00C O002 C00N 118.1(2) . . ?
C009 N004 C00A 118.14(17) . . ?
C009 N004 S001 114.56(15) . . ?
C00A N004 S001 119.51(15) . . ?
C009 C006 C007 123.8(2) . . ?
C009 C006 H006 118.1 . . ?
C007 C006 H006 118.1 . . ?
C00L C007 C00H 116.8(2) . . ?
C00L C007 C006 122.2(2) . . ?
C00H C007 C006 120.9(2) . . ?
C00B C008 C00E 117.6(2) . . ?
C00B C008 C009 121.23(19) . . ?
C00E C008 C009 121.2(2) . . ?
C006 C009 N004 120.2(2) . . ?
C006 C009 C008 125.5(2) . . ?
N004 C009 C008 114.31(18) . . ?
C00G C00A C00D 120.2(2) . . ?
C00G C00A N004 119.5(2) . . ?
C00D C00A N004 120.3(2) . . ?
C00F C00B C008 121.6(2) . . ?
C00F C00B H00B 119.2 . . ?
C008 C00B H00B 119.2 . . ?
O002 C00C C00J 116.0(2) . . ?
O002 C00C C00F 124.2(2) . . ?
C00J C00C C00F 119.8(2) . . ?
C00K C00D C00A 118.7(2) . . ?
C00K C00D H00D 120.6 . . ?
C00A C00D H00D 120.6 . . ?
C00J C00E C008 121.1(2) . . ?
C00J C00E H00E 119.5 . . ?
C008 C00E H00E 119.5 . . ?
C00B C00F C00C 119.3(2) . . ?
C00B C00F H00F 120.4 . . ?
C00C C00F H00F 120.4 . . ?
C00M C00G C00A 120.0(2) . . ?
C00M C00G H00G 120.0 . . ?
C00A C00G H00G 120.0 . . ?
C00O C00H C007 122.2(2) . . ?
C00O C00H S001 122.7(2) . . ?
C007 C00H S001 115.08(18) . . ?
C00K C00I C00M 117.2(2) . . ?
C00K C00I C00S 122.2(3) . . ?
C00M C00I C00S 120.7(3) . . ?
C00E C00J C00C 120.7(2) . . ?
C00E C00J H00J 119.7 . . ?
C00C C00J H00J 119.7 . . ?
C00D C00K C00I 122.6(2) . . ?
C00D C00K H00K 118.7 . . ?
C00I C00K H00K 118.7 . . ?
C00P C00L C007 120.8(3) . . ?
C00P C00L H00L 119.6 . . ?
C007 C00L H00L 119.6 . . ?
C00G C00M C00I 121.3(2) . . ?
C00G C00M H00M 119.3 . . ?
C00I C00M H00M 119.3 . . ?
O002 C00N C00R 107.8(3) . . ?
O002 C00N H00A 110.2 . . ?
C00R C00N H00A 110.2 . . ?
O002 C00N H00C 110.2 . . ?
C00R C00N H00C 110.2 . . ?
H00A C00N H00C 108.5 . . ?
C00Q C00O C00H 119.1(3) . . ?
C00Q C00O H00O 120.5 . . ?
C00H C00O H00O 120.5 . . ?
C00L C00P C00Q 121.5(3) . . ?
C00L C00P H00P 119.2 . . ?
C00Q C00P H00P 119.2 . . ?
C00P C00Q C00O 119.6(3) . . ?
C00P C00Q H00Q 120.2 . . ?
C00O C00Q H00Q 120.2 . . ?
C00N C00R H00H 109.5 . . ?
C00N C00R H00I 109.5 . . ?
H00H C00R H00I 109.5 . . ?
C00N C00R H00N 109.5 . . ?
H00H C00R H00N 109.5 . . ?
H00I C00R H00N 109.5 . . ?
C00I C00S H00R 109.5 . . ?
C00I C00S H00S 109.5 . . ?
H00R C00S H00S 109.5 . . ?
C00I C00S H00T 109.5 . . ?
H00R C00S H00T 109.5 . . ?
H00S C00S H00T 109.5 . . ?
 
_refine_diff_density_max    0.416
_refine_diff_density_min   -0.645
_refine_diff_density_rms    0.116

_shelxl_version_number 2014/6

_shelx_res_file
;
TITL vbchem001_0m_a.res in P2(1)/c
CELL  0.71073   6.2816  28.4861  11.4483   90.000  102.171   90.000
ZERR    4.000   0.0003   0.0016   0.0006    0.000    0.003    0.000
LATT 1
SYMM -X, 1/2+Y, 1/2-Z
SFAC C  H  N  O  S
UNIT 92  84  4  12  4
REM Old TITL vbchem001_0m in P2(1)/c
REM SHELXT solution in P2(1)/c
REM R1 0.192,  Rweak 0.014,  Alpha 0.036,  Orientation as input
REM Formula found by SHELXT:  C23 N O3 S
L.S. 10
ACTA
BOND $H
FMAP 2
PLAN 1
TEMP 23.000
WGHT    0.100000
FVAR       0.55775
S001  5    0.881431    0.370298    0.527807    11.00000    0.02738    0.06922 =
         0.03387    0.00358    0.00542    0.01284
O002  4    0.186915    0.544310    0.076287    11.00000    0.06145    0.05556 =
         0.04034    0.02107    0.00754   -0.00053
O003  4    1.005301    0.411733    0.564560    11.00000    0.02710    0.09458 =
         0.05222    0.00147    0.00286   -0.01799
N004  3    0.679422    0.385600    0.417579    11.00000    0.02844    0.04414 =
         0.02841   -0.00061    0.00567    0.00777
O005  4    0.987020    0.330512    0.490559    11.00000    0.06173    0.09784 =
         0.05102    0.00680    0.01299    0.04916
C006  1    0.492926    0.419894    0.559896    11.00000    0.02361    0.03493 =
         0.02809   -0.00080    0.00727   -0.00153
AFIX  43
H006  2    0.410621    0.444461    0.580602    11.00000   -1.20000
AFIX   0
C007  1    0.570712    0.384190    0.649034    11.00000    0.02622    0.04182 =
         0.02651    0.00094    0.00352   -0.00485
C008  1    0.437646    0.451828    0.352512    11.00000    0.02884    0.03236 =
         0.02778    0.00076    0.00623   -0.00319
C009  1    0.532844    0.419518    0.449396    11.00000    0.02332    0.03259 =
         0.02785   -0.00071    0.00444    0.00027
C00A  1    0.593300    0.351901    0.325488    11.00000    0.03182    0.03330 =
         0.02755    0.00466    0.00655    0.00508
C00B  1    0.235886    0.472887    0.348310    11.00000    0.03388    0.03599 =
         0.03163    0.00693    0.00973    0.00008
AFIX  43
H00B  2    0.159307    0.465828    0.407300    11.00000   -1.20000
AFIX   0
C00C  1    0.260253    0.514524    0.169494    11.00000    0.04489    0.03601 =
         0.03009    0.00731    0.00238   -0.00653
C00D  1    0.388801    0.332676    0.318838    11.00000    0.03558    0.04067 =
         0.04035    0.00703    0.01328    0.00272
AFIX  43
H00D  2    0.305735    0.340941    0.373968    11.00000   -1.20000
AFIX   0
C00E  1    0.547787    0.463144    0.262107    11.00000    0.03357    0.04849 =
         0.03780    0.00538    0.01225   -0.00007
AFIX  43
H00E  2    0.682627    0.449577    0.262577    11.00000   -1.20000
AFIX   0
C00F  1    0.146463    0.504124    0.258283    11.00000    0.03661    0.04043 =
         0.03694    0.00560    0.00773    0.00157
AFIX  43
H00F  2    0.011990    0.517962    0.257268    11.00000   -1.20000
AFIX   0
C00G  1    0.714213    0.339941    0.242147    11.00000    0.04035    0.04701 =
         0.03826   -0.00095    0.01730   -0.00248
AFIX  43
H00G  2    0.850093    0.353509    0.245712    11.00000   -1.20000
AFIX   0
C00H  1    0.746028    0.354969    0.639365    11.00000    0.03342    0.04503 =
         0.02790    0.00108    0.00242    0.00051
C00I  1    0.428210    0.287928    0.144878    11.00000    0.06149    0.03128 =
         0.04531    0.00130    0.00567   -0.00244
C00J  1    0.459886    0.494015    0.172518    11.00000    0.04532    0.05317 =
         0.03558    0.00914    0.01688   -0.00768
AFIX  43
H00J  2    0.536036    0.501115    0.113366    11.00000   -1.20000
AFIX   0
C00K  1    0.310643    0.301065    0.228996    11.00000    0.04529    0.03711 =
         0.05918    0.00493    0.00825   -0.00688
AFIX  43
H00K  2    0.173449    0.288044    0.224728    11.00000   -1.20000
AFIX   0
C00L  1    0.470813    0.375865    0.745223    11.00000    0.03802    0.06369 =
         0.03083    0.00291    0.01012   -0.00342
AFIX  43
H00L  2    0.357617    0.395187    0.756653    11.00000   -1.20000
AFIX   0
C00M  1    0.633770    0.308060    0.154189    11.00000    0.06030    0.04678 =
         0.03961   -0.00434    0.02190   -0.00050
AFIX  43
H00M  2    0.717805    0.299674    0.099629    11.00000   -1.20000
AFIX   0
C00N  1   -0.013264    0.568656    0.073116    11.00000    0.05973    0.04899 =
         0.04787    0.01267   -0.00351   -0.00082
AFIX  23
H00A  2   -0.004114    0.586867    0.145599    11.00000   -1.20000
H00C  2   -0.132094    0.546430    0.067008    11.00000   -1.20000
AFIX   0
C00O  1    0.811363    0.317899    0.717084    11.00000    0.05819    0.05362 =
         0.03856    0.00401   -0.00021    0.01468
AFIX  43
H00O  2    0.925172    0.298447    0.707222    11.00000   -1.20000
AFIX   0
C00P  1    0.537548    0.339639    0.822746    11.00000    0.06316    0.07534 =
         0.03592    0.01400    0.01477   -0.00525
AFIX  43
H00P  2    0.468280    0.334723    0.885931    11.00000   -1.20000
AFIX   0
C00Q  1    0.705065    0.310264    0.809352    11.00000    0.08032    0.05778 =
         0.04291    0.01807    0.00363    0.00212
AFIX  43
H00Q  2    0.746243    0.285464    0.862108    11.00000   -1.20000
AFIX   0
C00R  1   -0.052233    0.600441   -0.033653    11.00000    0.09817    0.05537 =
         0.05317    0.02149   -0.00878   -0.00364
AFIX 137
H00H  2    0.062551    0.623251   -0.024858    11.00000   -1.50000
H00I  2   -0.189291    0.616194   -0.039962    11.00000   -1.50000
H00N  2   -0.054911    0.582231   -0.104508    11.00000   -1.50000
AFIX   0
C00S  1    0.342714    0.253344    0.048361    11.00000    0.09738    0.05619 =
         0.06684   -0.01735    0.00886   -0.02019
AFIX 137
H00R  2    0.326791    0.223258    0.083320    11.00000   -1.50000
H00S  2    0.442677    0.250793   -0.004237    11.00000   -1.50000
H00T  2    0.203708    0.263748    0.003948    11.00000   -1.50000
AFIX   0
HKLF 4

REM  vbchem001_0m_a.res in P2(1)/c
REM R1 =  0.0700 for    3949 Fo > 4sig(Fo)  and  0.0908 for all    4922 data
REM    255 parameters refined using      0 restraints

END

WGHT      0.0886      1.9116

REM Highest difference peak  0.416,  deepest hole -0.645,  1-sigma level  0.116
Q1    1   0.8771  0.3374  0.5104  11.00000  0.05    0.42
;
_shelx_res_checksum   56127

_shelx_hkl_file
;
   1   0   0 2018.90   57.39
   1   0   0 1598.94   57.39
   1   0   0 1713.63   57.39
   2   0   0 1335.97   43.80
   2   0   0 1362.86   43.90
   2   0   0 1336.07   44.10
   2   0   0 1354.06   43.70
   2   0   0 1370.46   44.00
   2   0   0 1292.87   44.50
   2   0   0 1366.96   43.90
  -2   0   0 1245.68   43.80
   2   0   0 1349.77   43.90
  -2   0   0 1365.76   44.00
   2   0   0 1381.16   44.20
   3   0   0   38.40    3.50
   3   0   0   33.50    2.90
   3   0   0   39.00    2.60
  -3   0   0   34.70    2.40
  -3   0   0   32.40    2.70
   3   0   0   30.60    2.60
   3   0   0   29.10    2.40
  -3   0   0   37.90    3.50
  -3   0   0   33.40    2.50
   3   0   0   34.60    2.50
   3   0   0   37.30    2.50
   3   0   0   35.70    2.80
   3   0   0   33.60    2.40
   4   0   0  156.18    7.40
  -4   0   0  162.68    7.30
  -4   0   0  155.08    6.80
  -4   0   0  165.98    7.00
   4   0   0  144.99    7.00
   4   0   0  157.08    6.60
   4   0   0  160.78    7.40
  -4   0   0  156.98    8.00
   4   0   0  159.48    8.40
  -4   0   0  164.88    6.60
   4   0   0  163.68    7.00
   4   0   0  155.18    6.80
   4   0   0  156.58    7.60
   4   0   0  152.48    6.80
   5   0   0   11.50    3.80
   5   0   0   14.00    2.90
  -5   0   0   13.30    2.90
   5   0   0   16.20    3.20
   5   0   0   11.20    2.90
   5   0   0   13.90    2.80
  -5   0   0   15.70    2.60
  -5   0   0   15.30    3.80
   5   0   0   12.50    2.40
   5   0   0   14.20    2.80
  -5   0   0   15.00    2.70
   6   0   0    9.10    3.40
  -6   0   0   10.50    3.30
   6   0   0   12.60    4.40
   6   0   0    7.70    2.70
   6   0   0   10.50    3.30
  -6   0   0    3.30    2.40
   6   0   0    8.00    3.40
   6   0   0    9.80    3.00
  -6   0   0    9.20    4.20
  -6   0   0    6.40    3.20
   7   0   0  138.69   10.50
  -7   0   0  128.09    8.20
   7   0   0  129.99    8.20
  -7   0   0  136.59    8.40
  -7   0   0  138.09   10.20
   7   0   0  139.89    8.80
   7   0   0  129.79    8.50
  -7   0   0  132.69    8.60
   7   0   0  136.49    8.60
   8   0   0   30.90    7.30
  -8   0   0   30.20    7.10
  -8   0   0   32.30    5.90
   8   0   0   38.30    6.60
  -8   0   0   38.60    5.60
   8   0   0   33.00    5.50
   1  -1   0 1325.97   49.90
   1  -1   0 1547.75   49.90
   1  -1   0 1619.34   49.90
   1   1   0 1684.13   49.90
   1   1   0 1319.87   49.80
   1   1   0 1758.62   49.90
   2  -1   0  417.26   14.00
   2  -1   0  418.96   13.60
  -2  -1   0  400.76   14.40
  -2  -1   0  402.36   13.80
   2  -1   0  407.36   13.60
   2  -1   0  399.76   13.70
   2  -1   0  395.06   13.90
  -2  -1   0  343.97   13.50
   2  -1   0  414.06   14.00
   2  -1   0  413.16   13.80
   2  -1   0  412.06   13.70
   2  -1   0  403.46   14.50
  -2   1   0  408.36   13.90
   2   1   0  404.96   13.90
   2   1   0  404.86   13.60
   2   1   0  396.56   13.40
  -2   1   0  345.97   13.50
   2   1   0  384.66   14.40
   2   1   0  387.76   13.80
   2   1   0  396.86   13.80
   2   1   0  405.56   13.80
   2   1   0  382.36   13.90
  -2   1   0  405.76   13.80
   2   1   0  403.26   13.70
   3  -1   0    2.10    1.60
   3  -1   0    1.30    1.30
  -3  -1   0   -0.10    1.10
   3  -1   0   -0.40    1.30
   3  -1   0    2.20    1.30
   3  -1   0    2.10    1.30
  -3  -1   0    0.10    1.00
   3  -1   0    0.20    1.10
  -3  -1   0   -0.30    1.30
   3  -1   0    2.70    1.90
  -3  -1   0    2.30    1.80
   3  -1   0    1.40    1.50
   3  -1   0    0.60    1.10
   3   1   0    4.70    1.90
   3   1   0    2.90    1.50
   3   1   0    0.80    1.20
   3   1   0    2.40    1.70
  -3   1   0   -0.40    1.00
  -3   1   0   -0.80    1.20
  -3   1   0   -0.60    1.10
   3   1   0    1.40    1.40
   3   1   0    1.70    1.40
   3   1   0    0.70    1.20
   3   1   0    0.60    1.40
   3   1   0    0.90    1.30
  -3   1   0    0.00    1.20
   4  -1   0    2.10    1.60
   4  -1   0    0.90    1.50
   4  -1   0    3.50    1.60
  -4  -1   0   -1.20    1.60
  -4  -1   0    1.70    1.70
   4  -1   0    2.60    2.20
   4  -1   0    1.80    1.60
   4  -1   0   -0.20    1.30
  -4  -1   0    1.30    1.40
   4  -1   0    1.40    1.90
   4  -1   0    3.40    2.00
  -4  -1   0    0.10    1.30
   4  -1   0    5.30    1.70
   4   1   0    1.30    1.80
   4   1   0    3.00    1.90
   4   1   0    2.00    1.40
  -4   1   0    2.30    1.50
  -4   1   0    1.00    1.60
  -4   1   0    2.70    2.20
   4   1   0   -1.10    1.40
  -4   1   0   -0.30    1.20
   4   1   0    3.30    1.70
   4   1   0    2.50    1.60
   4   1   0    0.50    1.40
   4   1   0    1.70    1.20
   4   1   0    2.90    1.80
  -4   1   0    3.40    1.60
   5  -1   0    6.80    2.10
   5  -1   0    1.50    3.10
  -5  -1   0    5.90    2.40
   5  -1   0    6.10    2.60
   5  -1   0    1.40    2.70
   5  -1   0    0.10    2.30
   5  -1   0    2.20    1.90
  -5  -1   0    3.10    2.40
  -5  -1   0    0.90    1.80
   5  -1   0    7.40    2.00
   5  -1   0   -0.80    2.00
   5   1   0    4.20    2.50
   5   1   0    0.70    2.70
   5   1   0    5.30    2.40
   5   1   0    4.30    2.40
  -5   1   0    3.30    3.00
  -5   1   0    4.60    1.80
  -5   1   0    3.20    2.00
   5   1   0    6.70    2.10
  -5   1   0    1.80    2.40
   5   1   0    4.30    2.30
  -5   1   0    3.70    2.30
   5   1   0    4.70    2.70
  -6  -1   0   74.99    6.30
  -6  -1   0   71.69    5.80
   6  -1   0   77.09    6.20
  -6  -1   0   63.89    5.70
  -6  -1   0   71.49    7.10
   6  -1   0   77.79    6.50
   6  -1   0   81.19    5.60
  -6  -1   0   71.59    5.10
   6  -1   0   66.39    7.40
   6  -1   0   69.59    6.10
   6  -1   0   70.39    5.50
  -6   1   0   65.09    7.00
   6   1   0   75.99    5.70
   6   1   0   88.89    6.70
   6   1   0   89.59    6.60
   6   1   0   84.99    6.20
  -6   1   0   66.09    5.90
  -6   1   0   77.89    6.00
  -6   1   0   74.09    5.40
   6   1   0   69.59    6.00
   6   1   0   80.39    7.70
  -7  -1   0   13.70    4.00
  -7  -1   0   24.60    4.30
  -7  -1   0   17.40    3.90
   7  -1   0   20.60    4.10
   7  -1   0   26.10    4.90
   7  -1   0   19.70    4.90
  -7  -1   0   33.20    6.30
   7  -1   0   33.60    5.00
   7   1   0   20.80    4.40
  -7   1   0   31.90    4.80
   7   1   0   25.30    4.60
  -7   1   0   20.40    4.00
   7   1   0   27.60    6.00
  -7   1   0   24.80    4.70
   7   1   0   22.70    4.70
   7   1   0   21.60    4.20
  -7   1   0   28.50    5.40
  -8  -1   0    2.90    4.00
   8  -1   0    0.00    3.10
  -8  -1   0    6.50    3.60
   8  -1   0    3.10    5.00
   8  -1   0    7.10    4.10
  -8  -1   0    5.10    4.00
   8   1   0   -4.00    3.30
   8   1   0    1.40    4.30
  -8   1   0   -0.20    3.50
   8   1   0   -1.30    3.60
  -8   1   0    9.80    5.50
  -8   1   0    5.00    3.70
   0  -2   0    0.00    0.10
   1  -2   0  142.09    5.80
   1  -2   0  147.79    5.60
   1  -2   0  184.78    5.60
   1  -2   0  131.09    5.50
   1   2   0  151.38    5.80
   1   2   0  162.48    5.60
   2  -2   0  733.43   24.20
   2  -2   0  729.53   23.70
   2  -2   0  730.53   24.80
   2  -2   0  694.63   23.90
  -2  -2   0  721.83   24.60
   2  -2   0  748.63   23.90
   2  -2   0  744.43   23.90
   2  -2   0  738.13   24.30
  -2  -2   0  714.83   24.00
   2  -2   0  711.43   24.10
   2  -2   0  729.33   24.30
  -2   2   0  716.83   24.20
  -2   2   0  689.43   23.90
   2   2   0  719.43   24.10
   2   2   0  690.53   24.00
   2   2   0  707.33   24.70
   2   2   0  717.23   23.80
   2   2   0  715.03   24.30
   2   2   0  730.43   24.00
   2   2   0  710.23   24.10
  -2   2   0  731.43   24.10
   2   2   0  715.43   23.70
   2   2   0  701.23   24.00
   3  -2   0 1068.79   35.40
  -3  -2   0 1057.49   34.80
  -3  -2   0 1044.80   35.00
  -3  -2   0 1017.10   36.10
   3  -2   0 1084.39   35.00
   3  -2   0 1016.30   35.10
   3  -2   0 1085.99   35.70
  -3  -2   0 1070.09   35.30
   3  -2   0 1067.59   36.40
   3  -2   0 1070.49   34.90
   3  -2   0 1051.99   35.60
   3  -2   0 1093.89   35.10
   3  -2   0 1022.40   35.50
   3   2   0 1026.00   35.40
  -3   2   0 1086.79   35.40
   3   2   0 1027.20   35.20
  -3   2   0 1073.29   35.50
   3   2   0 1033.60   35.70
  -3   2   0 1071.49   35.10
   3   2   0 1020.40   36.20
  -3   2   0 1094.39   35.10
   3   2   0 1057.39   35.00
   3   2   0 1069.89   34.80
   3   2   0 1055.89   35.30
   3   2   0 1032.80   35.20
   3   2   0 1021.20   35.40
   4  -2   0  292.47   10.90
   4  -2   0  302.77   12.80
  -4  -2   0  288.07   12.50
   4  -2   0  308.37   11.50
  -4  -2   0  293.27   10.70
   4  -2   0  280.47   11.60
   4  -2   0  292.77   11.00
   4  -2   0  294.17   11.80
   4  -2   0  283.07   11.20
  -4  -2   0  286.37   11.40
  -4  -2   0  282.27   11.00
   4  -2   0  297.77   11.10
   4  -2   0  297.77   11.80
   4   2   0  272.17   11.50
  -4   2   0  291.37   10.90
   4   2   0  298.57   11.50
  -4   2   0  295.97   11.40
   4   2   0  285.17   11.20
   4   2   0  286.37   11.20
   4   2   0  280.47   10.60
   4   2   0  309.37   12.80
   4   2   0  286.27   11.50
  -4   2   0  282.57   11.00
  -4   2   0  289.17   11.60
   4   2   0  273.97   11.70
   4   2   0  296.17   11.10
  -5  -2   0    4.70    3.00
  -5  -2   0    0.80    1.60
   5  -2   0   -0.60    1.70
   5  -2   0   -0.40    2.30
   5  -2   0    5.00    2.10
   5  -2   0    1.70    2.50
   5  -2   0    2.30    2.60
   5  -2   0    3.10    3.10
   5  -2   0   -1.30    2.00
  -5  -2   0    4.30    2.30
   5  -2   0    3.60    1.90
   5   2   0    2.40    2.00
   5   2   0   -1.20    2.50
   5   2   0   -2.80    2.70
  -5   2   0    2.50    2.20
  -5   2   0    0.10    2.00
   5   2   0    0.40    2.30
   5   2   0    7.60    2.50
   5   2   0    1.50    2.30
   5   2   0    0.20    2.00
  -5   2   0   -2.30    2.20
  -5   2   0    3.10    2.40
  -5   2   0    3.60    1.70
   6  -2   0    2.00    2.70
   6  -2   0    5.60    3.30
  -6  -2   0    4.60    2.90
   6  -2   0    5.00    2.50
  -6  -2   0    4.00    2.70
   6  -2   0    1.50    2.40
  -6  -2   0    2.90    3.10
   6  -2   0    7.10    3.30
  -6  -2   0    6.10    4.00
   6   2   0    5.20    4.00
   6   2   0    3.40    2.80
   6   2   0    2.10    2.80
  -6   2   0    3.00    2.80
  -6   2   0    2.10    2.70
   6   2   0   11.00    3.70
   6   2   0    1.80    2.70
  -6   2   0    4.40    3.10
  -6   2   0    2.80    2.60
  -7  -2   0    9.60    3.30
  -7  -2   0    4.80    4.30
   7  -2   0    3.80    3.70
   7  -2   0    4.10    4.30
   7  -2   0    5.90    3.60
  -7  -2   0    4.70    2.80
   7  -2   0    0.60    3.30
  -7  -2   0    1.40    3.20
  -7   2   0    0.70    3.20
   7   2   0    9.80    3.60
  -7   2   0    2.40    3.10
   7   2   0    0.00    2.20
  -7   2   0    0.40    3.30
   7   2   0    4.50    2.90
  -7   2   0   10.10    4.70
   7   2   0   10.80    5.00
   7   2   0   -2.60    3.10
  -8  -2   0   -1.80    4.30
   8  -2   0    3.90    3.90
  -8  -2   0    2.50    3.40
  -8  -2   0   10.00    4.40
   8  -2   0    0.00    4.80
   8  -2   0    4.50    4.50
  -8   2   0    1.30    2.80
   8   2   0   -2.70    4.80
   8   2   0    1.30    3.40
  -8   2   0    6.80    5.10
   8   2   0   -2.30    4.00
  -8   2   0    3.30    3.50
   0  -3   0    0.00    0.10
   0   3   0    1.00    0.30
   1  -3   0 1371.16   44.20
   1  -3   0 1211.68   43.90
   1   3   0 1416.16   44.20
   1   3   0 1401.06   43.90
   2  -3   0  132.89    5.30
   2  -3   0  134.29    5.30
  -2  -3   0  108.89    4.80
   2  -3   0  129.69    5.10
  -2  -3   0  125.79    5.60
   2  -3   0  125.39    5.80
   2  -3   0  137.49    5.50
  -2  -3   0  128.79    5.10
   2  -3   0  128.79    4.80
   2  -3   0  129.29    5.10
   2  -3   0  132.59    5.40
   2  -3   0  127.89    5.00
  -2   3   0  135.19    5.30
   2   3   0  130.79    4.90
   2   3   0  131.09    5.20
   2   3   0  127.99    5.30
  -2   3   0  131.59    5.10
   2   3   0  136.39    5.50
   2   3   0  132.79    5.70
   2   3   0  130.29    4.80
   2   3   0  135.89    5.20
   2   3   0  134.59    5.60
  -2   3   0  123.79    5.30
   2   3   0  125.99    5.30
  -2   3   0  112.39    5.00
  -3  -3   0   44.90    2.60
   3  -3   0   47.60    3.60
   3  -3   0   49.60    2.90
   3  -3   0   45.60    3.10
   3  -3   0   49.50    3.10
   3  -3   0   49.30    3.00
  -3  -3   0   52.59    2.90
  -3  -3   0   48.20    3.80
   3  -3   0   49.50    3.10
   3  -3   0   45.80    3.20
  -3  -3   0   50.19    2.70
   3  -3   0   45.40    3.20
   3  -3   0   44.90    2.70
   3   3   0   51.89    2.80
   3   3   0   48.50    3.60
  -3   3   0   46.00    3.20
   3   3   0   46.80    3.10
   3   3   0   48.70    2.90
   3   3   0   46.30    3.30
  -3   3   0   47.40    3.10
  -3   3   0   46.20    3.20
   3   3   0   49.90    3.20
   3   3   0   46.90    3.10
   3   3   0   50.89    3.20
  -3   3   0   52.29    3.00
  -3   3   0   47.80    2.90
   3   3   0   49.10    2.60
  -4  -3   0   20.30    2.60
   4  -3   0   19.10    2.40
   4  -3   0   18.60    2.60
   4  -3   0   21.40    3.00
   4  -3   0   19.10    2.40
   4  -3   0   19.00    2.90
  -4  -3   0   20.50    2.00
   4  -3   0   20.90    2.20
  -4  -3   0   22.40    3.60
   4  -3   0   19.80    2.70
   4  -3   0   17.80    2.40
  -4  -3   0   19.80    2.30
   4  -3   0   19.50    3.50
   4   3   0   19.30    2.40
  -4   3   0   20.80    2.70
   4   3   0   17.50    2.40
   4   3   0   19.70    3.50
   4   3   0   18.10    2.50
  -4   3   0   20.70    3.00
   4   3   0   18.00    2.90
   4   3   0   17.80    2.60
  -4   3   0   20.30    2.40
  -4   3   0   19.20    2.40
   4   3   0   19.30    2.10
   4   3   0   22.00    2.80
  -4   3   0   21.40    2.90
   4   3   0   18.10    2.70
  -5  -3   0   44.10    5.10
  -5  -3   0   43.40    3.60
  -5  -3   0   43.90    3.40
   5  -3   0   44.80    4.20
   5  -3   0   52.19    5.00
   5  -3   0   42.50    4.00
   5  -3   0   38.60    4.30
  -5  -3   0   38.80    3.90
   5  -3   0   47.10    4.10
   5  -3   0   49.50    3.80
   5  -3   0   41.10    5.50
  -5   3   0   44.20    5.40
   5   3   0   40.40    3.60
   5   3   0   41.90    4.50
   5   3   0   40.40    4.30
  -5   3   0   44.20    3.50
  -5   3   0   40.40    4.60
  -5   3   0   42.70    3.80
   5   3   0   51.69    4.30
   5   3   0   42.50    5.50
   5   3   0   37.40    3.60
   5   3   0   41.80    3.90
  -5   3   0   40.90    4.10
   6  -3   0  108.39    6.60
  -6  -3   0  125.89    7.00
  -6  -3   0  111.19    8.50
   6  -3   0  130.69    7.80
   6  -3   0  117.69    7.10
   6  -3   0  118.89    9.10
   6  -3   0  126.69    7.90
  -6  -3   0  108.19    7.00
   6  -3   0  100.59    7.40
  -6  -3   0  110.29    7.60
  -6   3   0  115.29    7.50
  -6   3   0  116.59    7.00
   6   3   0  101.59    6.50
  -6   3   0  108.49    8.60
  -6   3   0  113.89    7.50
   6   3   0  109.99    7.10
   6   3   0  117.99    7.30
   6   3   0  114.49    8.90
   6   3   0  126.39    7.30
   6   3   0  133.19    8.20
   7  -3   0    8.20    3.80
  -7  -3   0   11.90    3.40
   7  -3   0    7.80    3.80
  -7  -3   0    5.40    3.80
   7  -3   0    7.90    3.60
  -7  -3   0   10.20    4.10
   7  -3   0   13.00    5.10
  -7  -3   0    9.30    3.50
   7   3   0    3.80    3.10
   7   3   0   10.50    3.60
  -7   3   0   12.30    3.90
   7   3   0    4.60    3.70
   7   3   0    7.90    3.60
   7   3   0    2.90    3.30
  -7   3   0    7.10    3.30
  -7   3   0    8.10    3.60
  -7   3   0   15.30    5.10
  -8  -3   0   20.30    6.00
   8  -3   0   25.00    6.80
   8  -3   0    4.00    4.00
   8  -3   0    0.30    4.00
  -8  -3   0    4.10    3.20
  -8   3   0   -0.30    3.60
   8   3   0    0.60    3.20
  -8   3   0   -2.90    3.30
   8   3   0   20.20    6.50
   8   3   0    4.70    3.70
  -8   3   0   12.30    5.70
   1  -4   0  391.36   12.10
   1  -4   0  319.17   12.40
  -1  -4   0  322.27   12.10
   1  -4   0  331.27   12.10
   1  -4   0  382.06   12.40
   1   4   0  386.36   11.90
   1   4   0  295.77   12.10
  -1   4   0  387.46   12.30
  -1   4   0  382.36   12.30
   1   4   0  384.26   12.30
   2  -4   0 1484.55   46.80
   2  -4   0 1474.95   47.10
   2  -4   0 1441.36   47.20
   2  -4   0 1432.86   48.10
   2  -4   0 1471.05   47.60
   2  -4   0 1385.36   46.90
   2  -4   0 1440.36   47.60
   2  -4   0 1446.76   47.40
  -2  -4   0 1464.65   47.10
  -2  -4   0 1298.97   46.70
  -2  -4   0 1428.56   47.80
  -2  -4   0 1453.45   47.50
   2  -4   0 1483.55   47.50
   2   4   0 1452.65   47.90
  -2   4   0 1384.86   46.70
   2   4   0 1499.85   46.80
   2   4   0 1435.36   47.20
  -2   4   0 1447.06   47.60
  -2   4   0 1410.36   47.10
   2   4   0 1423.96   47.50
   2   4   0 1463.75   46.80
   2   4   0 1443.16   47.60
  -2   4   0 1472.45   47.50
   2   4   0 1525.85   47.20
   2   4   0 1395.56   47.40
  -2   4   0 1502.25   47.30
   2   4   0 1426.16   47.40
   3  -4   0   96.29    4.50
   3  -4   0   93.49    4.70
  -3  -4   0   97.29    5.20
   3  -4   0   99.79    4.20
   3  -4   0   95.19    5.60
   3  -4   0   95.99    4.90
  -3  -4   0   89.19    4.00
   3  -4   0   99.39    4.50
   3  -4   0   90.59    5.10
   3  -4   0   92.49    4.40
  -3  -4   0   91.69    4.80
  -3  -4   0   98.09    4.50
   3  -4   0   95.89    4.90
  -3  -4   0   94.09    4.10
   3   4   0  101.59    4.60
   3   4   0   96.39    4.90
  -3   4   0   96.59    5.10
  -3   4   0   97.39    4.50
  -3   4   0   97.19    4.80
  -3   4   0  100.29    4.90
   3   4   0   93.49    4.80
   3   4   0   92.19    4.60
  -3   4   0  103.49    4.60
   3   4   0   98.99    4.80
   3   4   0  100.19    5.40
   3   4   0   93.29    4.20
   3   4   0   98.99    4.10
   3   4   0   96.59    4.90
  -4  -4   0   34.50    4.30
   4  -4   0   32.90    2.50
  -4  -4   0   37.70    3.90
   4  -4   0   38.30    3.90
   4  -4   0   40.20    3.50
   4  -4   0   39.20    4.60
   4  -4   0   34.60    2.90
  -4  -4   0   34.50    2.50
   4  -4   0   35.60    3.00
   4  -4   0   38.80    3.60
  -4  -4   0   31.50    3.00
   4  -4   0   41.90    4.00
  -4  -4   0   38.00    2.60
   4  -4   0   34.90    2.80
  -4   4   0   37.50    3.40
   4   4   0   36.90    3.20
  -4   4   0   29.80    2.70
   4   4   0   34.40    3.20
   4   4   0   32.70    2.40
   4   4   0   38.60    3.90
   4   4   0   36.20    3.60
  -4   4   0   38.50    3.90
   4   4   0   32.90    4.20
  -4   4   0   35.50    3.50
   4   4   0   36.50    3.10
  -4   4   0   34.60    2.90
   4   4   0   33.70    3.10
   4   4   0   36.30    2.70
   5  -4   0   85.69    5.50
  -5  -4   0   84.79    5.20
  -5  -4   0   85.69    6.50
  -5  -4   0   78.79    4.50
   5  -4   0   79.69    5.00
   5  -4   0   83.49    5.50
   5  -4   0   77.59    5.80
   5  -4   0   80.79    5.00
   5  -4   0   77.89    5.70
   5  -4   0   82.09    6.80
  -5  -4   0   80.19    5.80
  -5   4   0   73.69    5.70
   5   4   0   81.59    6.80
   5   4   0   70.99    5.40
   5   4   0   83.09    6.10
  -5   4   0   80.59    5.20
   5   4   0   74.99    5.30
  -5   4   0   90.89    5.00
  -5   4   0   80.39    5.40
   5   4   0   89.49    5.50
   5   4   0   77.19    5.20
   6  -4   0    6.60    3.10
   6  -4   0    0.00    3.20
   6  -4   0    3.10    2.30
   6  -4   0   -0.80    2.70
   6  -4   0   -4.20    2.60
  -6  -4   0    1.50    2.40
  -6  -4   0    5.80    4.00
  -6  -4   0    1.50    2.40
   6   4   0    4.90    2.90
   6   4   0    3.40    2.60
   6   4   0    7.90    4.30
  -6   4   0   -0.20    3.00
  -6   4   0    3.80    3.20
   6   4   0    3.10    2.80
   6   4   0    0.30    2.30
   6   4   0    2.60    2.30
  -6   4   0    1.10    2.70
   7  -4   0   24.80    5.00
  -7  -4   0   25.00    4.30
   7  -4   0   35.30    6.60
   7  -4   0   28.50    5.20
  -7  -4   0   33.00    5.40
  -7  -4   0   26.50    5.90
   7  -4   0   27.00    5.00
   7  -4   0   27.20    4.70
  -7   4   0   24.40    4.90
  -7   4   0   23.40    4.70
   7   4   0   24.10    4.90
  -7   4   0   29.40    6.00
  -7   4   0   25.80    4.40
   7   4   0   29.60    6.50
   7   4   0   26.40    5.30
   8  -4   0   25.30    5.80
  -8  -4   0   29.70    5.20
  -8  -4   0   18.30    4.10
   8  -4   0   25.30    5.40
   8  -4   0   33.70    7.50
  -8  -4   0   25.30    6.40
   8   4   0   30.40    5.80
   8   4   0   31.00    7.30
   8   4   0   24.10    4.60
  -8   4   0   18.90    6.20
  -8   4   0   24.30    5.20
  -8   4   0   29.00    5.50
   0  -5   0    0.00    0.30
   0  -5   0    0.30    0.30
   0  -5   0   -0.20    0.50
   0  -5   0    0.30    0.50
   0  -5   0   -0.20    0.40
   0   5   0    0.60    0.60
   0   5   0    0.10    0.50
   0   5   0    0.20    0.50
   0   5   0    0.00    0.30
   0   5   0    0.00    0.50
  -1  -5   0 3410.76  106.49
   1  -5   0 3285.07  106.39
   1  -5   0 3439.36  106.29
   1  -5   0 3355.76  106.59
   1  -5   0 3245.18  106.79
  -1   5   0 3434.66  106.59
   1   5   0 3018.90  106.39
  -1   5   0 3117.09  106.39
   1   5   0 3342.77  106.59
   1   5   0 3432.76  106.29
   1   5   0 3230.38  106.49
  -1   5   0 3341.77  106.59
   2  -5   0   22.40    2.50
  -2  -5   0   19.80    1.50
   2  -5   0   19.20    1.60
   2  -5   0   17.80    1.50
   2  -5   0   19.10    1.90
  -2  -5   0   15.70    1.20
   2  -5   0   16.40    2.00
   2  -5   0   16.10    1.30
   2  -5   0   18.40    2.00
  -2  -5   0   16.40    2.20
  -2  -5   0   21.20    2.20
   2  -5   0   16.80    2.10
   2   5   0   15.70    1.30
  -2   5   0   15.80    2.10
   2   5   0   16.50    2.10
  -2   5   0   18.60    1.60
  -2   5   0   13.60    1.20
  -2   5   0   16.70    2.00
   2   5   0   19.00    1.90
  -2   5   0   16.60    1.50
   2   5   0   16.30    2.30
   2   5   0   21.00    1.90
   2   5   0   16.90    1.70
   2   5   0   16.70    1.80
   2   5   0   17.90    1.30
   3  -5   0  187.58    7.80
  -3  -5   0  189.98    7.00
   3  -5   0  184.68    8.10
  -3  -5   0  182.18    7.80
   3  -5   0  194.38    7.40
  -3  -5   0  190.98    7.40
   3  -5   0  179.48    7.20
   3  -5   0  192.28    7.60
   3  -5   0  189.78    6.90
   3  -5   0  184.48    7.90
   3  -5   0  180.18    8.00
  -3  -5   0  186.28    8.40
   3  -5   0  188.98    8.70
   3   5   0  183.48    8.50
  -3   5   0  191.48    7.40
   3   5   0  188.78    7.60
  -3   5   0  187.68    6.90
   3   5   0  179.88    7.90
   3   5   0  187.18    6.90
   3   5   0  203.58    7.60
   3   5   0  179.28    7.70
  -3   5   0  189.68    7.50
  -3   5   0  187.18    8.00
   3   5   0  179.18    7.60
   3   5   0  181.78    7.90
   3   5   0  193.58    7.10
  -3   5   0  182.78    7.90
  -3   5   0  185.78    7.90
  -4  -5   0   28.70    2.20
   4  -5   0   33.00    2.30
  -4  -5   0   30.00    2.80
   4  -5   0   29.60    2.90
  -4  -5   0   29.80    3.30
   4  -5   0   31.60    3.40
   4  -5   0   29.80    4.20
  -4  -5   0   28.60    2.40
  -4  -5   0   26.20    3.80
   4  -5   0   31.10    2.90
   4  -5   0   28.60    3.30
   4  -5   0   28.90    2.90
   4  -5   0   27.00    2.70
   4  -5   0   22.90    3.40
  -4   5   0   27.10    2.20
  -4   5   0   34.10    3.50
  -4   5   0   28.50    2.80
  -4   5   0   27.90    3.50
   4   5   0   35.60    4.40
   4   5   0   29.90    2.60
   4   5   0   29.40    3.40
   4   5   0   32.80    3.00
   4   5   0   31.60    3.40
   4   5   0   28.10    2.20
  -4   5   0   32.50    2.80
   4   5   0   26.60    2.90
  -4   5   0   37.50    3.10
   4   5   0   31.10    3.10
   4   5   0   33.00    3.30
  -5  -5   0    0.30    2.40
   5  -5   0   -1.60    2.10
   5  -5   0   -0.90    2.20
   5  -5   0   -2.80    2.20
   5  -5   0   -4.40    2.30
  -5  -5   0   -0.80    1.90
  -5  -5   0    0.80    2.00
   5  -5   0    1.40    1.90
   5  -5   0   -0.90    1.80
   5  -5   0   -1.10    2.30
   5   5   0   -2.30    2.00
   5   5   0   -0.20    1.60
  -5   5   0   -1.10    1.70
   5   5   0   -2.00    2.00
   5   5   0   -0.10    2.10
  -5   5   0   -2.80    1.70
   5   5   0   -1.20    1.90
  -5   5   0   -6.30    1.80
  -5   5   0    0.20    2.40
   5   5   0   -3.90    2.50
  -6  -5   0   67.59    5.20
   6  -5   0   89.09    7.90
   6  -5   0   65.29    5.40
  -6  -5   0   68.89    5.60
   6  -5   0   61.89    6.10
   6  -5   0   62.09    5.60
   6  -5   0   73.59    6.50
  -6  -5   0   69.49    7.10
  -6   5   0   59.49    5.50
  -6   5   0   84.09    7.50
  -6   5   0   62.79    6.40
   6   5   0   74.19    5.70
   6   5   0   72.99    7.50
   6   5   0   66.29    5.80
   6   5   0   67.39    5.40
   6   5   0   66.79    5.60
  -6   5   0   62.59    5.80
   6   5   0   60.79    6.10
   7  -5   0   58.79    6.20
   7  -5   0   57.59    7.90
   7  -5   0   49.50    7.80
  -7  -5   0   64.19    6.90
  -7  -5   0   43.20    5.30
   7  -5   0   46.50    6.10
   7  -5   0   51.39    6.50
  -7  -5   0   46.50    7.20
   7   5   0   56.29    6.30
   7   5   0   44.20    6.40
  -7   5   0   51.79    6.20
  -7   5   0   44.20    5.60
   7   5   0   54.99    7.90
  -7   5   0   49.90    7.20
  -7   5   0   56.99    7.80
  -8  -5   0    2.50    4.50
   8  -5   0    1.00    4.80
   8  -5   0    8.30    4.20
  -8  -5   0    0.20    3.40
   8  -5   0    3.30    4.20
  -8  -5   0   -2.00    4.60
   8   5   0    5.00    3.90
  -8   5   0    5.20    3.80
  -8   5   0    8.10    5.30
   8   5   0    0.30    4.50
   8   5   0    6.40    5.50
  -8   5   0    9.20    4.20
   1  -6   0  196.98    7.20
   1  -6   0  177.78    7.20
   1  -6   0  183.18    7.20
   1  -6   0  208.98    7.50
  -1  -6   0  197.58    7.10
  -1  -6   0  193.18    7.30
   1  -6   0  208.78    7.00
   1   6   0  202.78    6.80
  -1   6   0  205.18    7.20
   1   6   0  199.68    6.70
   1   6   0  162.78    7.00
   1   6   0  193.88    7.20
   1   6   0  179.48    7.10
  -1   6   0  196.38    7.30
  -1   6   0  203.68    7.20
   1   6   0  194.28    7.20
   2  -6   0 1586.64   51.89
  -2  -6   0 1577.24   51.09
   2  -6   0 1541.55   51.29
   2  -6   0 1593.94   51.09
   2  -6   0 1575.54   52.19
   2  -6   0 1606.04   52.19
  -2  -6   0 1575.84   52.39
  -2  -6   0 1588.64   52.09
   2  -6   0 1563.04   52.69
  -2  -6   0 1606.04   51.49
   2  -6   0 1550.84   51.89
   2  -6   0 1596.14   52.19
   2   6   0 1579.74   52.19
   2   6   0 1648.14   52.59
  -2   6   0 1632.24   51.09
  -2   6   0 1601.04   51.79
   2   6   0 1565.84   52.09
  -2   6   0 1589.74   52.19
   2   6   0 1574.74   51.69
   2   6   0 1599.04   52.09
   2   6   0 1558.24   51.29
   2   6   0 1533.85   51.99
  -2   6   0 1569.04   52.19
  -2   6   0 1625.54   51.89
  -3  -6   0   66.59    3.10
   3  -6   0   67.69    4.00
   3  -6   0   67.99    4.00
  -3  -6   0   65.09    4.00
   3  -6   0   74.39    3.70
  -3  -6   0   76.79    3.60
  -3  -6   0   67.39    4.60
   3  -6   0   69.59    4.10
   3  -6   0   69.49    3.70
   3  -6   0   68.79    4.20
   3  -6   0   62.89    4.40
   3  -6   0   71.39    3.20
   3  -6   0   64.89    3.40
  -3   6   0   67.69    4.10
   3   6   0   74.59    4.20
   3   6   0   65.99    4.00
   3   6   0   63.19    4.60
  -3   6   0   73.99    3.10
   3   6   0   71.99    4.10
  -3   6   0   68.09    4.10
   3   6   0   71.29    3.80
  -3   6   0   73.09    3.70
  -3   6   0   72.19    3.60
   3   6   0   69.79    3.20
   3   6   0   72.29    4.20
  -4  -6   0   64.49    3.80
  -4  -6   0   60.49    4.60
  -4  -6   0   60.99    3.30
   4  -6   0   59.49    4.50
   4  -6   0   61.19    3.80
   4  -6   0   62.19    4.10
  -4  -6   0   55.79    4.50
  -4  -6   0   64.69    3.30
   4  -6   0   51.19    4.60
   4  -6   0   57.29    3.60
   4  -6   0   58.99    3.90
   4  -6   0   61.49    3.30
   4  -6   0   55.99    4.20
   4  -6   0   66.69    4.40
   4   6   0   63.09    4.70
  -4   6   0   66.49    4.00
   4   6   0   61.29    4.40
  -4   6   0   52.59    4.10
   4   6   0   58.19    3.90
  -4   6   0   55.29    3.90
  -4   6   0   55.29    4.30
   4   6   0   60.59    4.70
   4   6   0   54.49    4.10
  -4   6   0   58.49    3.10
   4   6   0   56.69    4.20
  -4   6   0   53.99    3.60
  -5  -6   0    0.10    2.00
   5  -6   0   -0.20    2.00
   5  -6   0   -1.40    1.60
   5  -6   0   -3.20    2.50
   5  -6   0   -0.90    1.70
  -5  -6   0    1.00    1.90
   5  -6   0    0.70    1.80
   5  -6   0   -1.70    2.90
   5  -6   0   -0.20    2.50
  -5  -6   0    0.20    2.10
   5   6   0   -0.10    2.30
   5   6   0   -1.90    2.80
  -5   6   0   -1.10    1.60
  -5   6   0   -0.70    1.80
   5   6   0   -2.10    1.90
  -5   6   0   -0.50    2.50
  -5   6   0   -4.70    1.70
   5   6   0    1.40    2.20
   5   6   0   -2.60    2.10
   6  -6   0   60.49    7.50
   6  -6   0   53.09    5.60
   6  -6   0   56.59    6.10
   6  -6   0   51.79    5.90
   6  -6   0   57.79    4.90
  -6  -6   0   59.09    7.00
  -6  -6   0   48.10    5.40
  -6  -6   0   57.99    4.90
  -6   6   0   56.19    6.00
  -6   6   0   58.99    6.80
   6   6   0   49.70    5.70
   6   6   0   52.79    5.50
  -6   6   0   44.60    5.60
   6   6   0   50.69    5.70
  -6   6   0   52.69    4.70
   6   6   0   63.09    7.20
   6   6   0   53.59    5.10
   7  -6   0   18.40    4.60
  -7  -6   0   22.00    3.90
   7  -6   0   22.50    4.40
  -7  -6   0   13.00    4.40
  -7  -6   0   26.60    5.10
   7  -6   0   24.00    5.80
   7  -6   0   21.90    4.80
   7   6   0   11.80    4.50
   7   6   0   17.60    4.30
   7   6   0   20.90    5.20
  -7   6   0   20.80    4.70
  -7   6   0   26.50    6.10
  -7   6   0   20.10    4.20
   8  -6   0    4.40    5.50
  -8  -6   0   -1.80    4.10
  -8  -6   0    6.80    4.00
   8  -6   0    2.60    3.90
   8  -6   0    1.70    3.10
  -8  -6   0    4.80    5.20
   8   6   0    4.40    4.00
  -8   6   0    6.00    5.10
  -8   6   0    3.90    3.90
  -8   6   0    7.80    3.90
   8   6   0    5.20    5.70
   8   6   0   -6.70    4.40
   0  -7   0    0.00    0.70
   0  -7   0   -0.10    0.50
   0  -7   0    0.00    0.50
   0  -7   0   -0.30    0.60
   0  -7   0    0.20    0.50
   0   7   0   -0.10    0.60
   0   7   0   -0.70    0.70
   0   7   0    1.10    0.90
   0   7   0   -0.20    0.40
   0   7   0   -0.20    0.60
   0   7   0    0.50    0.60
   1  -7   0  445.26   15.40
   1  -7   0  459.45   15.70
  -1  -7   0  455.15   15.50
   1  -7   0  439.36   15.40
   1  -7   0  465.65   15.10
  -1  -7   0  446.96   15.30
   1  -7   0  446.26   15.40
   1   7   0  435.96   15.50
  -1   7   0  457.05   15.30
   1   7   0  438.96   15.30
   1   7   0  455.05   14.90
   1   7   0  447.46   14.80
   1   7   0  453.45   15.40
  -1   7   0  436.76   15.40
  -1   7   0  444.76   15.40
   1   7   0  443.66   15.40
  -1   7   0  449.95   15.30
  -2  -7   0   54.29    2.60
  -2  -7   0   54.09    3.40
   2  -7   0   53.39    3.40
   2  -7   0   55.49    3.50
   2  -7   0   53.39    2.90
   2  -7   0   55.79    3.40
   2  -7   0   51.29    2.40
  -2  -7   0   49.30    3.20
   2  -7   0   52.89    2.90
   2  -7   0   52.79    3.10
  -2   7   0   53.09    3.40
  -2   7   0   56.49    3.40
   2   7   0   49.10    3.00
  -2   7   0   54.79    3.00
   2   7   0   54.39    2.80
  -2   7   0   53.09    2.90
   2   7   0   49.80    3.30
  -2   7   0   56.69    2.20
   2   7   0   51.79    3.20
   2   7   0   51.19    2.40
   2   7   0   51.99    3.30
   3  -7   0  114.99    6.30
   3  -7   0  118.79    6.00
  -3  -7   0  124.09    6.20
   3  -7   0  124.29    6.10
  -3  -7   0  120.89    4.70
   3  -7   0  117.29    5.60
   3  -7   0  125.69    5.60
   3  -7   0  114.89    5.00
   3  -7   0  120.09    5.80
  -3  -7   0  118.09    5.70
   3  -7   0  124.29    4.70
  -3  -7   0  126.69    5.20
   3   7   0  119.79    5.80
   3   7   0  124.69    5.90
  -3   7   0  126.29    5.80
   3   7   0  118.09    5.70
  -3   7   0  126.49    4.70
  -3   7   0  117.89    6.00
  -3   7   0  127.19    5.40
   3   7   0  118.09    4.80
  -3   7   0  126.69    5.60
   3   7   0  117.69    5.40
   3   7   0  124.99    6.30
   3   7   0  111.49    5.60
  -4  -7   0   -0.80    1.10
   4  -7   0    6.60    2.00
  -4  -7   0    0.60    1.60
  -4  -7   0    0.50    1.80
   4  -7   0    2.90    2.20
   4  -7   0    2.00    1.30
   4  -7   0   -0.80    1.40
   4  -7   0   -0.10    1.50
   4  -7   0    1.10    2.40
  -4  -7   0    2.90    1.50
   4  -7   0    3.30    1.50
   4   7   0    1.10    1.90
  -4   7   0    3.00    2.10
  -4   7   0    3.20    1.60
   4   7   0    2.90    1.70
  -4   7   0   -0.10    1.60
   4   7   0    3.70    1.90
   4   7   0    0.50    1.60
  -4   7   0    1.10    1.70
   4   7   0    1.60    1.60
   4   7   0    3.20    1.70
  -4   7   0   -1.30    1.40
   5  -7   0   16.80    3.00
   5  -7   0   18.80    3.80
  -5  -7   0   22.40    4.30
   5  -7   0   18.20    3.30
  -5  -7   0   23.20    3.10
  -5  -7   0   18.80    3.70
   5  -7   0   14.80    2.60
   5  -7   0   19.80    3.50
   5  -7   0   17.60    3.70
  -5   7   0   20.60    3.10
  -5   7   0   21.80    3.50
   5   7   0   21.50    3.60
  -5   7   0   13.80    3.20
  -5   7   0   26.00    3.90
   5   7   0   24.70    3.80
   5   7   0   18.00    3.80
   5   7   0   20.60    3.30
   5   7   0   23.80    4.50
   6  -7   0   47.90    6.80
   6  -7   0   47.00    5.40
  -6  -7   0   46.30    6.40
  -6  -7   0   46.20    4.50
  -6  -7   0   31.20    5.10
   6  -7   0   39.80    4.80
   6  -7   0   38.70    5.30
   6  -7   0   37.60    5.40
  -6   7   0   42.60    5.20
   6   7   0   44.50    5.10
   6   7   0   50.49    5.90
  -6   7   0   40.10    5.10
   6   7   0   40.60    5.00
   6   7   0   33.80    6.20
  -6   7   0   47.40    5.70
   6   7   0   38.20    5.10
  -6   7   0   40.50    5.20
   7  -7   0   42.70    7.50
  -7  -7   0   41.40    6.90
  -7  -7   0   38.30    5.90
   7  -7   0   35.10    5.50
   7  -7   0   33.00    5.50
   7  -7   0   40.00    6.00
  -7   7   0   40.80    5.50
   7   7   0   29.60    4.80
  -7   7   0   40.60    5.80
   7   7   0   42.60    7.40
   7   7   0   34.60    6.10
  -7   7   0   35.60    7.00
  -8  -7   0    3.80    4.60
  -8  -7   0    9.10    4.30
   8  -7   0    3.40    4.10
  -8  -7   0   13.70    5.80
  -8   7   0   13.30    5.10
   8   7   0    4.60    4.30
   8   7   0   11.10    5.50
  -8   7   0   18.00    6.10
  -8   7   0   10.00    4.50
   0  -8   0    9.10    1.40
   0  -8   0    9.90    0.90
   0  -8   0   11.00    1.10
   0  -8   0    9.80    1.00
   0   8   0   13.60    1.10
   0   8   0   10.40    1.10
   0   8   0   11.10    1.30
   0   8   0    8.90    1.10
   0   8   0    6.40    0.90
   0   8   0   10.00    1.10
  -1  -8   0    8.70    1.20
   1  -8   0    8.70    1.10
  -1  -8   0    6.60    1.40
   1  -8   0    8.30    1.40
   1  -8   0    9.30    1.50
   1  -8   0    4.90    1.30
   1  -8   0   10.20    1.50
  -1  -8   0    7.80    0.90
  -1   8   0   10.10    1.30
   1   8   0    7.10    0.90
   1   8   0    5.60    1.40
   1   8   0    8.00    1.20
  -1   8   0    6.50    1.30
  -1   8   0    7.30    1.40
  -1   8   0    7.70    1.40
   1   8   0    7.10    1.20
   1   8   0    6.90    0.90
   1   8   0    7.80    1.30
  -1   8   0    8.20    0.80
   2  -8   0   80.89    4.50
   2  -8   0   84.49    4.20
   2  -8   0   85.29    3.80
   2  -8   0   82.79    4.40
  -2  -8   0   85.99    4.10
  -2  -8   0   82.49    4.30
   2  -8   0   81.39    4.40
  -2  -8   0   87.09    3.60
   2  -8   0   82.99    3.30
   2   8   0   83.09    4.20
   2   8   0   87.79    3.40
  -2   8   0   79.29    4.10
  -2   8   0   82.99    4.40
  -2   8   0   83.49    3.10
   2   8   0   89.49    3.80
   2   8   0   83.59    4.20
  -2   8   0   85.39    4.40
  -2   8   0   85.29    4.00
   2   8   0   77.09    4.20
   2   8   0   78.99    4.10
   3  -8   0  284.07   11.40
   3  -8   0  301.57    9.90
  -3  -8   0  302.57   11.80
   3  -8   0  278.17   10.30
   3  -8   0  268.67   11.90
   3  -8   0  292.47   11.30
  -3  -8   0  291.27    9.90
  -3  -8   0  295.17   10.50
  -3  -8   0  292.17   11.30
   3  -8   0  297.47   11.10
   3  -8   0  292.27   11.50
   3  -8   0  297.87   11.10
   3   8   0  281.07   11.20
  -3   8   0  286.57    9.80
   3   8   0  269.47   11.10
   3   8   0  284.97   11.30
   3   8   0  285.77   11.30
  -3   8   0  296.57   11.00
   3   8   0  281.57   10.10
  -3   8   0  270.97   11.30
  -3   8   0  296.17   10.70
   3   8   0  295.07   12.00
  -3   8   0  293.97   11.30
   3   8   0  280.17   10.70
   4  -8   0  300.87   12.10
   4  -8   0  314.47   12.30
   4  -8   0  305.37   11.90
  -4  -8   0  302.87   12.80
  -4  -8   0  296.27   12.40
   4  -8   0  292.27   11.20
   4  -8   0  294.77   13.40
   4  -8   0  306.67   12.60
   4  -8   0  290.77   12.50
  -4  -8   0  312.47   11.50
   4   8   0  281.57   12.00
   4   8   0  335.57   13.30
  -4   8   0  300.07   11.50
   4   8   0  295.07   12.30
  -4   8   0  316.87   11.90
  -4   8   0  312.37   12.30
   4   8   0  306.47   11.80
   4   8   0  287.77   12.50
  -4   8   0  296.37   12.40
   4   8   0  295.77   12.20
  -4   8   0  303.87   12.60
   5  -8   0  206.68    9.70
   5  -8   0  182.28    9.40
  -5  -8   0  203.78    8.70
   5  -8   0  184.88    9.40
   5  -8   0  191.98    9.80
  -5  -8   0  204.68   10.50
   5  -8   0  192.98   10.80
  -5  -8   0  185.18    9.60
  -5   8   0  186.58    9.40
   5   8   0  185.28    9.00
  -5   8   0  198.88    9.70
  -5   8   0  190.68    8.80
  -5   8   0  206.98    9.60
   5   8   0  190.28    9.90
   5   8   0  205.68   10.80
   5   8   0  191.68    9.60
   5   8   0  187.88    9.10
   5   8   0  200.58   10.20
   6  -8   0   65.79    7.40
  -6  -8   0   50.19    5.90
  -6  -8   0   45.60    6.30
   6  -8   0   36.70    5.10
  -6  -8   0   50.79    4.60
   6  -8   0   46.80    6.00
   6  -8   0   44.70    5.40
   6  -8   0   50.69    5.70
   6   8   0   46.40    5.40
  -6   8   0   53.59    5.90
  -6   8   0   50.09    5.60
   6   8   0   65.19    6.70
   6   8   0   44.10    5.40
   6   8   0   42.10    6.60
  -6   8   0   48.80    5.50
  -6   8   0   50.49    4.60
   7  -8   0   14.30    3.90
  -7  -8   0   14.00    4.60
   7  -8   0   17.00    4.30
  -7  -8   0   13.50    5.10
   7  -8   0   21.70    6.00
   7  -8   0   14.90    4.40
   7   8   0   17.60    4.20
  -7   8   0   13.90    3.80
   7   8   0   23.00    5.00
  -7   8   0   20.30    4.40
  -7   8   0    7.60    3.90
   7   8   0   14.90    5.60
   7   8   0   14.10    5.10
   0  -9   0   -1.00    0.60
   0  -9   0   -1.40    0.70
   0  -9   0   -0.80    0.90
   0  -9   0   -0.30    0.60
   0  -9   0   -0.90    0.60
   0   9   0    1.70    0.70
   0   9   0   -0.80    0.70
   0   9   0   -0.80    0.90
   0   9   0   -0.70    0.60
   0   9   0   -0.60    0.60
   0   9   0   -0.80    0.70
   1  -9   0  315.77   11.00
   1  -9   0  319.57   11.40
   1  -9   0  319.57   11.40
   1  -9   0  327.47   11.80
   1  -9   0  308.07   11.30
  -1  -9   0  313.57   11.20
  -1  -9   0  319.87   10.80
  -1  -9   0  319.37   11.50
   1   9   0  304.67   11.20
  -1   9   0  314.17   11.40
  -1   9   0  325.87   10.60
   1   9   0  311.77   11.60
  -1   9   0  325.97   11.40
   1   9   0  300.37   10.80
  -1   9   0  310.87   11.30
   1   9   0  330.17   11.30
   1   9   0  331.67   10.80
   1   9   0  316.47   11.40
  -1   9   0  314.57   11.30
   2  -9   0  313.17   11.50
  -2  -9   0  323.67   11.10
   2  -9   0  309.77   10.70
   2  -9   0  312.17   11.90
  -2  -9   0  317.07   12.10
   2  -9   0  330.37   12.00
   2  -9   0  323.67   12.00
  -2  -9   0  313.67   11.70
   2  -9   0  318.37   12.40
  -2   9   0  330.37   10.60
   2   9   0  321.27   12.00
   2   9   0  325.27   11.90
  -2   9   0  319.67   12.00
   2   9   0  308.37   11.90
  -2   9   0  327.17   11.70
  -2   9   0  317.97   11.90
   2   9   0  326.97   11.20
   2   9   0  311.27   11.80
   2   9   0  316.07   10.90
  -2   9   0  327.27   11.60
  -3  -9   0   97.39    3.80
   3  -9   0   99.39    5.20
   3  -9   0   95.69    5.40
   3  -9   0  103.59    5.50
   3  -9   0  101.69    6.00
   3  -9   0  100.49    4.30
  -3  -9   0  105.89    5.50
  -3  -9   0  101.79    4.50
   3  -9   0   94.39    4.90
  -3  -9   0   98.29    5.10
   3   9   0  105.29    5.30
   3   9   0   95.39    4.60
   3   9   0   98.99    4.10
  -3   9   0   97.39    3.80
  -3   9   0  107.29    4.80
  -3   9   0  101.99    5.10
   3   9   0  104.89    5.50
   3   9   0   98.29    5.30
  -3   9   0  100.99    5.20
   3   9   0   96.69    5.10
  -3   9   0   99.19    5.50
   4  -9   0    3.30    1.50
   4  -9   0    3.30    2.20
   4  -9   0    3.20    1.60
  -4  -9   0    2.80    1.90
   4  -9   0    2.90    2.40
  -4  -9   0    6.60    1.70
  -4  -9   0    1.90    1.90
   4  -9   0    0.20    1.90
   4  -9   0    2.10    2.40
   4   9   0    1.50    1.80
  -4   9   0    3.90    2.30
   4   9   0    5.30    2.40
  -4   9   0    3.10    2.00
   4   9   0    3.20    2.20
  -4   9   0   -0.60    2.10
   4   9   0    4.30    2.20
  -4   9   0    4.70    1.80
   4   9   0    3.20    1.90
   4   9   0    4.80    1.80
  -4   9   0    4.60    2.70
  -5  -9   0   21.30    2.90
   5  -9   0   14.40    3.20
   5  -9   0   22.40    4.60
   5  -9   0   18.40    3.60
  -5  -9   0   15.00    3.10
   5  -9   0   12.40    3.30
  -5  -9   0   20.30    3.60
   5  -9   0   13.60    3.10
  -5   9   0   18.70    3.20
  -5   9   0   12.00    3.30
   5   9   0   17.30    3.30
   5   9   0   13.00    3.10
   5   9   0   20.90    3.90
   5   9   0   11.50    3.30
   5   9   0   17.40    3.70
   5   9   0   15.30    3.20
  -5   9   0   18.00    3.50
  -5   9   0   16.70    3.50
   6  -9   0   86.09    6.50
   6  -9   0   81.19    6.90
  -6  -9   0   86.39    7.50
   6  -9   0   68.49    6.00
   6  -9   0   76.19    6.50
  -6  -9   0   88.09    5.60
   6  -9   0   73.89    7.10
  -6  -9   0   70.29    7.10
   6   9   0   80.19    7.20
  -6   9   0   82.59    6.50
  -6   9   0   80.59    5.60
  -6   9   0   74.89    6.60
   6   9   0   73.39    6.90
  -6   9   0   76.49    6.10
   6   9   0   74.39    6.60
   6   9   0   75.09    6.20
  -7  -9   0   39.10    6.80
   7  -9   0   37.60    6.50
   7  -9   0   41.90    6.00
   7  -9   0   43.50    6.40
  -7  -9   0   47.60    6.50
   7  -9   0   35.90    5.70
  -7   9   0   41.30    6.10
   7   9   0   36.40    5.00
  -7   9   0   33.70    6.00
   7   9   0   40.00    6.50
   7   9   0   39.70    5.90
   7   9   0   49.40    7.70
  -7   9   0   39.70    5.60
   0 -10   0   17.60    1.60
   0 -10   0   19.00    1.30
   0 -10   0   18.80    1.50
   0 -10   0   18.00    1.50
   0 -10   0   17.40    1.30
   0  10   0   16.70    1.30
   0  10   0   18.20    1.50
   0  10   0   19.00    1.40
   0  10   0   18.40    1.70
   0  10   0   17.20    1.40
   0  10   0   17.00    1.50
   1 -10   0   45.70    2.70
   1 -10   0   45.80    2.60
   1 -10   0   44.80    2.60
  -1 -10   0   48.90    2.20
  -1 -10   0   47.10    2.90
  -1 -10   0   49.80    2.60
   1 -10   0   49.10    3.20
   1 -10   0   43.90    2.40
  -1  10   0   43.70    2.60
   1  10   0   43.90    2.30
  -1  10   0   47.10    2.70
   1  10   0   51.99    2.80
  -1  10   0   44.20    2.60
  -1  10   0   46.70    2.10
   1  10   0   44.40    3.00
  -1  10   0   47.50    2.80
   1  10   0   48.50    2.90
   1  10   0   43.90    2.20
  -2 -10   0   42.90    2.20
   2 -10   0   37.50    3.10
  -2 -10   0   39.10    2.90
   2 -10   0   38.50    2.80
   2 -10   0   41.80    2.60
   2 -10   0   41.50    3.10
   2 -10   0   42.70    1.90
  -2 -10   0   42.30    2.80
   2 -10   0   43.10    3.50
   2  10   0   41.80    2.10
  -2  10   0   40.90    2.70
   2  10   0   39.30    2.80
   2  10   0   43.40    2.40
   2  10   0   39.50    2.90
  -2  10   0   42.00    2.70
  -2  10   0   43.60    3.30
   2  10   0   38.50    2.80
  -2  10   0   44.60    1.80
  -2  10   0   39.90    2.90
   2  10   0   37.90    3.00
  -3 -10   0  153.48    5.90
   3 -10   0  145.59    7.60
   3 -10   0  132.69    5.60
  -3 -10   0  135.79    5.10
   3 -10   0  143.29    7.00
  -3 -10   0  147.89    6.90
  -3 -10   0  145.69    7.00
   3 -10   0  141.39    6.40
   3 -10   0  141.29    6.90
   3 -10   0  144.69    7.00
  -3  10   0  147.59    5.20
   3  10   0  151.18    7.00
  -3  10   0  145.79    7.00
  -3  10   0  137.89    6.90
   3  10   0  141.69    6.10
  -3  10   0  152.38    6.60
   3  10   0  143.89    6.80
   3  10   0  143.39    6.90
   3  10   0  142.99    5.50
  -3  10   0  148.19    6.40
   3  10   0  149.88    7.00
   4 -10   0   24.30    3.70
  -4 -10   0   30.00    3.80
   4 -10   0   27.60    4.30
   4 -10   0   22.40    3.10
  -4 -10   0   29.30    2.60
  -4 -10   0   18.90    3.40
   4 -10   0   27.10    3.60
   4 -10   0   19.70    3.50
  -4  10   0   27.00    3.70
  -4  10   0   21.00    3.60
   4  10   0   22.00    3.60
   4  10   0   26.70    3.00
   4  10   0   24.50    3.30
  -4  10   0   27.90    3.30
   4  10   0   25.30    3.30
   4  10   0   24.80    3.70
   4  10   0   28.10    3.70
  -4  10   0   25.30    2.70
   5 -10   0   33.50    4.50
   5 -10   0   26.60    4.00
   5 -10   0   26.70    4.00
   5 -10   0   28.20    4.00
  -5 -10   0   27.80    3.30
   5 -10   0   33.00    5.30
  -5 -10   0   27.00    3.80
  -5 -10   0   35.60    5.00
  -5  10   0   29.90    4.10
  -5  10   0   26.10    4.20
   5  10   0   25.40    4.10
   5  10   0   31.60    5.10
   5  10   0   30.50    3.80
   5  10   0   28.00    4.10
   5  10   0   29.80    4.30
  -5  10   0   23.80    3.70
   5  10   0   27.40    3.90
  -5  10   0   37.00    4.10
   6 -10   0   44.90    5.20
  -6 -10   0   34.90    4.90
  -6 -10   0   41.70    5.70
  -6 -10   0   30.50    5.60
   6 -10   0   40.90    5.70
   6 -10   0   41.20    5.30
   6 -10   0   37.00    5.90
   6 -10   0   34.00    5.00
   6  10   0   38.70    6.40
   6  10   0   35.60    5.10
  -6  10   0   43.10    5.70
  -6  10   0   33.30    4.70
  -6  10   0   32.20    4.30
   6  10   0   32.30    4.60
  -6  10   0   32.10    5.00
   6  10   0   34.30    5.60
   7 -10   0    3.10    4.00
   7 -10   0   15.10    5.30
  -7 -10   0    7.70    4.60
  -7 -10   0    3.30    4.10
   7 -10   0    8.40    4.00
   7 -10   0    4.20    3.70
   7  10   0    3.00    4.50
   7  10   0    4.30    3.00
  -7  10   0    6.00    3.70
  -7  10   0    4.40    3.90
  -7  10   0    5.70    3.70
   7  10   0   16.40    5.60
   7  10   0    8.70    3.90
   0 -11   0   -0.30    0.80
   0 -11   0   -0.60    0.60
   0 -11   0   -0.90    1.00
   0 -11   0    0.00    0.80
   0 -11   0    0.20    0.80
   0  11   0    0.40    1.10
   0  11   0   -0.20    0.90
   0  11   0    0.10    0.90
   0  11   0    0.30    0.90
   0  11   0    0.40    0.70
   0  11   0    1.00    0.90
   1 -11   0   86.19    4.30
   1 -11   0   96.99    3.30
  -1 -11   0   87.49    4.10
  -1 -11   0   95.39    3.80
   1 -11   0   92.79    3.90
   1 -11   0   89.09    4.70
  -1 -11   0   89.99    4.50
   1 -11   0   93.09    4.40
   1 -11   0   95.99    4.40
   1  11   0   94.09    4.20
   1  11   0   91.09    4.40
   1  11   0   89.89    3.80
  -1  11   0   95.69    4.30
  -1  11   0   91.29    3.60
   1  11   0   90.49    4.60
   1  11   0   94.59    3.80
  -1  11   0   88.89    4.20
  -1  11   0   91.29    4.30
  -1  11   0   96.09    4.40
   2 -11   0    2.60    1.30
  -2 -11   0    2.50    1.70
   2 -11   0    3.80    1.70
  -2 -11   0    3.30    1.20
  -2 -11   0    3.20    1.00
   2 -11   0    4.30    1.50
   2 -11   0    3.70    0.60
   2 -11   0    1.60    1.20
   2 -11   0    3.10    1.00
  -2  11   0    3.30    1.80
  -2  11   0    3.50    1.40
  -2  11   0    1.20    1.60
   2  11   0    3.10    1.10
   2  11   0    1.20    1.50
   2  11   0    3.50    1.30
   2  11   0    3.60    0.90
  -2  11   0    3.20    1.30
   2  11   0    1.70    1.30
  -2  11   0    3.40    0.70
   2  11   0    0.80    1.30
  -3 -11   0   81.09    4.90
  -3 -11   0   91.59    5.30
   3 -11   0   78.99    5.30
   3 -11   0   82.09    5.10
   3 -11   0   82.59    4.50
   3 -11   0   83.89    5.10
   3 -11   0   78.09    3.60
   3 -11   0   78.59    4.80
  -3 -11   0   86.99    4.00
   3  11   0   80.09    4.70
  -3  11   0   86.09    4.90
   3  11   0   80.79    4.90
  -3  11   0   85.69    4.70
  -3  11   0   87.39    5.10
   3  11   0   87.49    4.80
   3  11   0   80.39    4.10
   3  11   0   89.89    4.90
  -3  11   0   88.59    4.50
   3  11   0   82.59    3.60
   4 -11   0   41.90    3.90
   4 -11   0   46.70    4.00
  -4 -11   0   54.29    4.40
   4 -11   0   49.50    4.00
  -4 -11   0   46.80    4.00
  -4 -11   0   52.59    3.30
   4 -11   0   42.10    4.00
   4 -11   0   53.59    5.30
  -4  11   0   44.70    3.40
  -4  11   0   44.50    4.10
   4  11   0   50.39    4.60
   4  11   0   44.20    4.10
   4  11   0   41.80    3.90
   4  11   0   48.90    3.70
  -4  11   0   37.20    3.80
   4  11   0   40.60    3.90
  -4  11   0   55.09    4.10
   5 -11   0   73.69    6.40
  -5 -11   0   83.49    4.90
  -5 -11   0   87.19    6.80
  -5 -11   0   77.49    6.20
   5 -11   0   70.29    5.60
   5 -11   0   79.39    6.10
   5 -11   0   86.49    6.40
   5 -11   0   72.09    5.60
   5  11   0   69.09    5.50
   5  11   0   71.49    6.00
  -5  11   0   82.49    6.10
  -5  11   0   82.69    5.50
   5  11   0   72.09    6.00
  -5  11   0   77.09    5.70
  -5  11   0   69.89    5.90
   5  11   0   73.39    6.40
   6 -11   0    5.30    3.70
   6 -11   0    8.30    3.20
  -6 -11   0    0.90    3.30
  -6 -11   0    2.40    3.00
   6 -11   0    3.00    3.20
   6 -11   0   14.40    4.70
   6 -11   0    3.30    3.80
   6  11   0    4.10    3.30
   6  11   0    3.70    3.30
  -6  11   0    0.10    2.70
  -6  11   0    4.30    3.50
  -6  11   0    3.00    3.60
  -6  11   0   -0.90    3.10
   6  11   0    5.60    4.00
   6  11   0    3.70    3.30
   7 -11   0   16.60    5.80
   7 -11   0    9.60    3.50
  -7 -11   0    9.70    5.00
   7 -11   0    7.80    3.50
   7 -11   0    6.40    3.90
  -7 -11   0    3.60    4.20
   7  11   0    9.90    4.70
   7  11   0   16.40    4.80
  -7  11   0    7.60    3.40
   7  11   0    9.40    3.40
  -7  11   0   10.20    3.40
   0 -12   0    0.30    0.90
   0 -12   0   -0.30    0.90
   0 -12   0   -0.30    0.80
   0 -12   0    1.30    0.80
   0 -12   0   -0.50    0.70
   0  12   0    0.30    0.70
   0  12   0   -0.30    0.90
   0  12   0    0.00    0.80
   0  12   0    1.20    1.00
   0  12   0    0.80    1.00
   0  12   0   -0.30    0.90
  -1 -12   0   26.80    2.30
   1 -12   0   30.10    2.50
  -1 -12   0   29.70    1.80
   1 -12   0   31.80    2.30
   1 -12   0   31.80    2.40
  -1 -12   0   30.50    2.30
   1 -12   0   30.00    1.40
   1 -12   0   29.60    2.20
  -1 -12   0   29.30    1.60
   1 -12   0   30.90    2.00
   1  12   0   30.40    2.40
  -1  12   0   28.60    2.20
   1  12   0   30.20    1.80
   1  12   0   29.50    1.50
   1  12   0   29.20    2.50
  -1  12   0   28.60    1.70
  -1  12   0   26.80    2.20
   1  12   0   32.10    1.90
  -1  12   0   28.80    2.20
  -1  12   0   30.00    2.20
   1  12   0   27.60    2.30
   2 -12   0  482.65   16.50
  -2 -12   0  513.85   17.10
   2 -12   0  510.75   18.10
   2 -12   0  504.05   18.10
   2 -12   0  500.05   18.10
  -2 -12   0  485.85   17.90
  -2 -12   0  509.15   18.30
   2 -12   0  503.95   18.80
   2 -12   0  525.45   17.60
   2  12   0  503.25   18.30
  -2  12   0  505.65   18.10
   2  12   0  503.45   18.10
   2  12   0  529.95   18.10
   2  12   0  488.95   17.90
  -2  12   0  502.25   17.90
   2  12   0  488.35   17.00
  -2  12   0  518.05   16.70
  -2  12   0  515.25   17.90
  -2  12   0  489.85   18.10
   2  12   0  519.55   17.30
   3 -12   0  255.17   10.60
   3 -12   0  247.98   10.50
  -3 -12   0  253.97   10.30
   3 -12   0  260.77   10.70
   3 -12   0  244.28   11.10
   3 -12   0  243.18    9.90
  -3 -12   0  256.67   10.80
  -3 -12   0  261.87    9.40
   3  12   0  247.08    9.60
   3  12   0  247.58   10.50
  -3  12   0  250.97   10.60
   3  12   0  241.68    9.00
  -3  12   0  259.07   10.30
   3  12   0  244.88   10.40
   3  12   0  245.68   10.30
  -3  12   0  250.97   10.60
  -3  12   0  260.37   10.00
   3  12   0  260.77   10.40
   4 -12   0  392.06   17.20
  -4 -12   0  437.26   17.00
   4 -12   0  426.86   16.40
  -4 -12   0  425.56   16.40
   4 -12   0  405.86   16.30
  -4 -12   0  416.56   15.00
   4 -12   0  409.06   16.20
   4 -12   0  388.06   15.70
  -4  12   0  422.86   15.90
  -4  12   0  429.06   15.50
   4  12   0  404.36   16.40
   4  12   0  431.46   16.60
   4  12   0  433.96   16.60
   4  12   0  411.26   15.40
  -4  12   0  416.06   16.30
  -4  12   0  413.36   16.30
   4  12   0  401.86   16.30
   5 -12   0   65.89    5.80
   5 -12   0   58.99    5.10
  -5 -12   0   69.89    5.80
   5 -12   0   66.29    6.80
  -5 -12   0   61.69    4.30
  -5 -12   0   52.39    5.20
   5 -12   0   57.59    5.60
   5 -12   0   58.79    5.10
  -5  12   0   55.69    5.80
   5  12   0   53.49    5.80
  -5  12   0   55.99    5.10
   5  12   0   54.79    5.10
   5  12   0   61.99    6.10
  -5  12   0   58.99    5.00
   5  12   0   60.29    5.90
  -5  12   0   53.09    5.60
  -6 -12   0   76.99    6.30
   6 -12   0   76.69    7.10
  -6 -12   0   85.69    7.80
   6 -12   0   88.79    7.30
   6 -12   0   77.29    8.00
   6 -12   0   84.49    6.60
   6 -12   0   72.89    6.00
   6  12   0   73.89    6.40
  -6  12   0   67.29    5.80
   6  12   0   87.29    6.30
  -6  12   0   82.09    7.10
  -6  12   0   82.39    6.00
  -6  12   0   77.79    6.90
   6  12   0   77.49    6.20
   7 -12   0    4.30    3.10
   7 -12   0    9.40    4.60
   7 -12   0   10.60    5.40
  -7 -12   0   10.50    4.60
  -7 -12   0   10.80    5.10
   7  12   0   11.00    4.30
   7  12   0    6.20    3.90
   7  12   0    0.10    4.40
  -7  12   0    5.60    4.20
  -7  12   0    7.30    3.10
   0 -13   0   -0.50    0.70
   0 -13   0   -1.40    0.80
   0 -13   0   -0.10    0.80
   0 -13   0   -0.40    1.10
   0 -13   0   -0.90    0.80
   0  13   0    0.20    0.90
   0  13   0    0.20    0.70
   0  13   0   -1.20    0.90
   0  13   0    0.30    0.80
   0  13   0    0.10    0.90
   0  13   0   -1.30    1.20
  -1 -13   0  150.08    5.30
   1 -13   0  146.79    6.20
   1 -13   0  154.18    5.10
  -1 -13   0  141.49    6.10
  -1 -13   0  153.78    5.70
  -1 -13   0  139.99    6.00
   1 -13   0  155.48    6.90
  -1 -13   0  146.89    6.50
   1 -13   0  151.18    6.30
   1 -13   0  150.08    5.90
   1  13   0  140.49    6.10
  -1  13   0  146.89    6.40
   1  13   0  146.99    6.60
   1  13   0  152.78    6.40
   1  13   0  156.48    5.70
  -1  13   0  148.69    5.60
  -1  13   0  145.19    6.30
  -1  13   0  142.99    6.10
  -1  13   0  146.09    6.20
   1  13   0  148.49    5.30
   1  13   0  149.09    5.80
  -2 -13   0  236.08    8.30
   2 -13   0  228.88    8.70
   2 -13   0  228.38    9.30
   2 -13   0  234.38    9.40
  -2 -13   0  218.58    9.00
   2 -13   0  212.18    7.60
  -2 -13   0  221.98    9.40
   2 -13   0  236.48   10.00
   2 -13   0  236.58    9.40
   2  13   0  221.78    9.20
  -2  13   0  222.68    9.00
  -2  13   0  227.18    9.30
   2  13   0  226.78    8.40
   2  13   0  226.08    8.20
   2  13   0  231.28    9.60
  -2  13   0  229.58    9.10
  -2  13   0  226.98    7.80
   2  13   0  226.48    9.10
   2  13   0  226.48    9.10
  -2  13   0  216.58    9.20
  -3 -13   0   44.60    3.90
  -3 -13   0   47.80    2.90
   3 -13   0   52.79    4.20
  -3 -13   0   50.79    3.90
   3 -13   0   48.00    3.40
   3 -13   0   47.80    3.70
   3 -13   0   50.19    4.10
   3 -13   0   50.99    4.60
   3  13   0   50.49    4.10
  -3  13   0   51.99    3.90
   3  13   0   49.80    4.10
   3  13   0   47.40    3.20
   3  13   0   50.99    4.10
  -3  13   0   41.50    3.90
  -3  13   0   51.99    3.50
   3  13   0   44.80    3.60
  -3  13   0   54.29    4.30
   4 -13   0   19.50    3.60
  -4 -13   0   15.70    2.90
  -4 -13   0   21.30    2.60
   4 -13   0   18.80    3.10
   4 -13   0   18.30    3.20
   4 -13   0   16.70    3.00
   4 -13   0   16.20    3.40
  -4 -13   0   22.00    3.80
   4  13   0   24.00    2.90
   4  13   0   15.70    3.20
  -4  13   0   23.60    3.50
  -4  13   0   18.40    3.10
   4  13   0   17.80    3.60
  -4  13   0   20.20    2.80
   4  13   0   20.10    3.10
   4  13   0   17.70    3.10
  -4  13   0   22.50    3.40
  -5 -13   0   67.39    5.50
  -5 -13   0   93.69    7.10
   5 -13   0   78.49    7.40
   5 -13   0   81.79    6.40
   5 -13   0   72.19    5.70
  -5 -13   0   82.29    5.10
   5 -13   0   75.59    5.70
   5 -13   0   89.99    6.60
   5  13   0   74.49    5.80
   5  13   0   79.69    6.00
  -5  13   0   78.99    5.60
   5  13   0   76.99    5.80
  -5  13   0   79.19    6.40
   5  13   0   70.09    5.60
  -5  13   0   66.29    6.10
  -5  13   0   74.99    5.70
   6 -13   0    6.40    3.40
   6 -13   0   -3.00    3.30
  -6 -13   0    0.90    2.70
   6 -13   0    4.50    3.20
   6 -13   0    5.20    3.70
  -6 -13   0   22.90    4.90
   6 -13   0    5.80    3.00
  -6  13   0    0.60    2.40
   6  13   0    8.00    3.80
  -6  13   0    7.90    3.30
  -6  13   0    0.30    3.50
   6  13   0    0.00    3.30
   6  13   0    1.60    3.00
  -6  13   0    2.10    2.80
   7 -13   0   62.99    7.90
  -7 -13   0   74.29    6.90
   7 -13   0   61.89    9.00
   7 -13   0   75.19    7.30
  -7 -13   0   83.29    8.00
  -7 -13   0   70.79    7.20
   7  13   0   73.39    6.60
   7  13   0   77.09    8.40
  -7  13   0   80.39    7.20
   7  13   0   59.79    6.80
  -7  13   0   67.69    7.70
   0 -14   0   19.30    2.00
   0 -14   0   18.90    1.50
   0 -14   0   18.00    1.80
   0 -14   0   22.10    2.00
   0 -14   0   18.90    1.80
   0  14   0   19.30    1.60
   0  14   0   19.50    2.10
   0  14   0   20.60    2.10
   0  14   0   16.60    1.80
   0  14   0   17.70    1.90
   0  14   0   19.30    1.70
   1 -14   0    1.60    1.20
  -1 -14   0    1.20    1.00
  -1 -14   0    2.10    1.40
   1 -14   0    3.20    1.20
   1 -14   0    1.20    0.90
   1 -14   0    1.40    0.50
  -1 -14   0    1.80    0.70
  -1 -14   0    1.40    1.10
  -1 -14   0    3.10    1.00
   1 -14   0    2.90    1.40
   1  14   0    2.60    1.30
   1  14   0    2.20    1.00
   1  14   0    3.00    0.70
  -1  14   0    2.80    1.50
  -1  14   0    2.10    1.00
   1  14   0    1.30    1.10
   1  14   0    3.40    1.00
  -1  14   0   -0.20    1.20
  -1  14   0    2.30    1.60
  -1  14   0    3.00    1.40
   1  14   0   -1.00    1.10
   2 -14   0  154.68    6.80
   2 -14   0  131.59    6.40
   2 -14   0  144.29    6.10
   2 -14   0  143.89    6.70
   2 -14   0  139.79    7.10
  -2 -14   0  142.19    6.70
  -2 -14   0  142.19    6.30
  -2 -14   0  151.18    5.70
   2  14   0  136.89    6.40
  -2  14   0  143.09    6.50
  -2  14   0  145.89    5.20
   2  14   0  140.49    6.90
  -2  14   0  137.89    6.30
   2  14   0  145.39    6.50
  -2  14   0  152.58    6.80
   2  14   0  139.69    5.70
  -2  14   0  129.19    6.60
   2  14   0  142.49    6.60
   2  14   0  135.59    5.50
   3 -14   0  127.49    7.70
  -3 -14   0  131.59    6.50
  -3 -14   0  139.89    5.70
   3 -14   0  137.39    6.30
   3 -14   0  135.39    6.80
   3 -14   0  139.89    7.00
  -3 -14   0  130.79    6.90
   3 -14   0  137.59    6.80
  -3  14   0  130.79    6.70
   3  14   0  135.69    7.10
  -3  14   0  141.09    6.50
   3  14   0  131.89    6.90
   3  14   0  140.09    7.10
  -3  14   0  129.69    6.70
   3  14   0  137.49    6.70
   3  14   0  132.59    5.90
  -3  14   0  132.19    6.70
  -4 -14   0    1.50    1.60
   4 -14   0    3.70    2.80
   4 -14   0    1.80    2.30
   4 -14   0    1.20    2.00
   4 -14   0    1.80    2.10
  -4 -14   0    3.70    2.80
   4 -14   0   -1.40    1.80
  -4 -14   0   -0.10    2.50
   4  14   0   -3.40    2.60
  -4  14   0    1.70    2.80
   4  14   0    2.80    2.70
  -4  14   0   -4.10    2.20
   4  14   0   -3.30    2.20
   4  14   0   -0.60    1.90
  -4  14   0    2.10    1.90
  -4  14   0    0.10    2.30
   4  14   0    0.80    2.00
   5 -14   0   39.10    5.30
  -5 -14   0   42.60    5.20
   5 -14   0   38.30    5.00
  -5 -14   0   39.30    4.70
   5 -14   0   38.80    5.10
   5 -14   0   30.90    4.30
   5 -14   0   31.90    5.80
  -5  14   0   40.60    5.10
  -5  14   0   38.30    4.60
  -5  14   0   34.90    5.00
  -5  14   0   48.10    5.50
   5  14   0   38.40    5.10
   5  14   0   42.10    5.00
   5  14   0   30.50    4.50
   5  14   0   34.30    5.10
  -6 -14   0    1.50    2.80
   6 -14   0    0.60    3.00
   6 -14   0    0.50    2.60
   6 -14   0   -2.10    3.20
   6 -14   0    2.30    3.00
  -6 -14   0    3.80    3.90
   6 -14   0   -3.50    3.50
   6  14   0    6.10    3.00
  -6  14   0   -2.90    2.70
  -6  14   0   -0.50    3.50
   6  14   0   -1.60    2.70
  -6  14   0   -0.30    3.40
  -6  14   0    3.10    3.50
   6  14   0    1.40    3.40
  -7 -14   0   16.30    5.10
   7 -14   0   10.20    5.20
   7 -14   0   12.90    5.50
   7 -14   0    8.10    4.60
  -7 -14   0   19.20    4.60
  -7 -14   0   12.20    5.20
   7  14   0   13.90    5.30
  -7  14   0   15.40    4.70
  -7  14   0   14.20    4.90
   7  14   0    8.00    4.40
   7  14   0   17.10    5.10
   0 -15   0   -0.70    0.90
   0 -15   0   -1.10    0.90
   0 -15   0    0.20    0.80
   0 -15   0   -0.40    0.70
   0 -15   0   -1.00    1.20
   0  15   0   -1.80    0.80
   0  15   0   -0.50    0.80
   0  15   0    0.90    1.50
   0  15   0   -1.00    0.90
   0  15   0   -0.80    1.10
   0  15   0   -0.40    1.00
  -1 -15   0   52.79    3.20
   1 -15   0   61.99    3.60
  -1 -15   0   54.49    2.50
  -1 -15   0   58.09    3.60
  -1 -15   0   57.39    3.30
   1 -15   0   58.69    2.30
  -1 -15   0   57.19    3.00
   1 -15   0   55.49    3.50
   1 -15   0   57.89    3.10
   1 -15   0   55.29    3.80
   1  15   0   48.60    3.20
   1  15   0   56.99    2.50
   1  15   0   58.19    2.80
   1  15   0   53.19    3.60
  -1  15   0   56.99    3.50
  -1  15   0   57.09    2.90
  -1  15   0   61.49    3.50
   1  15   0   54.59    3.90
  -1  15   0   58.09    3.60
   1  15   0   60.89    3.10
  -1  15   0   57.69    3.50
  -2 -15   0   82.19    5.00
   2 -15   0   78.59    4.80
   2 -15   0   81.59    4.80
  -2 -15   0   84.79    4.60
   2 -15   0   83.09    5.20
  -2 -15   0   85.69    3.90
   2 -15   0   86.49    4.20
   2 -15   0   91.29    4.80
  -2  15   0   79.69    4.80
  -2  15   0   80.59    4.60
  -2  15   0   83.19    3.40
  -2  15   0   85.49    4.50
   2  15   0   77.19    5.00
   2  15   0   78.09    4.40
   2  15   0   79.09    3.70
  -2  15   0   77.29    4.40
   2  15   0   88.69    3.90
   2  15   0   80.69    4.70
  -3 -15   0   15.60    3.10
  -3 -15   0   15.80    2.80
   3 -15   0   15.70    3.00
   3 -15   0   15.80    3.30
   3 -15   0   13.30    2.00
   3 -15   0   16.10    2.70
   3 -15   0   17.50    2.70
  -3 -15   0   16.30    1.90
  -3  15   0   10.40    3.00
   3  15   0   16.00    2.10
   3  15   0   20.50    3.10
   3  15   0   20.30    3.20
   3  15   0   19.60    3.20
  -3  15   0   15.60    2.90
   3  15   0   18.10    3.20
  -3  15   0   12.60    2.50
  -3  15   0   14.10    2.70
   4 -15   0    6.50    3.00
   4 -15   0   12.90    3.40
   4 -15   0    6.30    3.20
  -4 -15   0   11.50    3.20
   4 -15   0    8.60    3.00
  -4 -15   0   11.20    3.40
   4 -15   0    9.00    2.60
  -4  15   0   12.60    2.90
   4  15   0   10.00    2.80
   4  15   0   11.00    3.30
   4  15   0   16.20    3.50
  -4  15   0    9.10    3.40
  -4  15   0   10.30    3.30
   4  15   0   10.10    3.40
  -4  15   0    8.40    2.50
   5 -15   0   24.60    4.10
   5 -15   0   26.00    4.50
   5 -15   0   22.50    4.30
  -5 -15   0   30.60    5.00
   5 -15   0   22.60    3.70
  -5 -15   0   21.50    4.20
   5 -15   0   21.20    4.50
   5  15   0   29.00    4.70
  -5  15   0   18.90    3.80
   5  15   0   24.40    3.90
  -5  15   0   22.20    4.50
  -5  15   0   24.00    4.00
  -5  15   0   20.40    4.20
   5  15   0   20.80    4.10
   5  15   0   24.60    4.50
   6 -15   0    9.60    3.60
   6 -15   0    9.50    4.20
  -6 -15   0    9.80    4.50
   6 -15   0   12.70    4.30
   6 -15   0   10.30    4.80
  -6 -15   0   11.40    3.50
   6 -15   0    6.40    3.20
   6  15   0    7.10    3.40
  -6  15   0    5.00    3.90
  -6  15   0    7.10    3.70
   6  15   0    1.70    3.70
  -6  15   0    0.60    2.70
  -6  15   0    9.50    3.60
   6  15   0    8.70    3.40
  -7 -15   0    2.00    4.30
  -7 -15   0    8.30    4.90
   7 -15   0    0.20    4.50
   7 -15   0    7.30    4.40
  -7 -15   0    2.60    2.80
   7 -15   0    2.70    4.80
   7  15   0    1.00    4.00
   7  15   0    3.90    4.60
   7  15   0    3.20    3.40
  -7  15   0    4.30    4.00
  -7  15   0    3.80    4.40
   0 -16   0  120.89    5.10
   0 -16   0  115.19    5.00
   0 -16   0  117.89    5.80
   0 -16   0  108.79    4.60
   0 -16   0  118.39    5.10
   0  16   0  115.29    5.20
   0  16   0  109.59    4.90
   0  16   0  113.59    5.20
   0  16   0  116.39    5.80
   0  16   0  119.89    5.00
   0  16   0  115.39    4.70
  -1 -16   0   25.60    2.40
   1 -16   0   21.60    2.60
   1 -16   0   18.30    1.70
   1 -16   0   23.00    3.10
  -1 -16   0   26.00    1.60
  -1 -16   0   26.20    2.00
  -1 -16   0   20.20    2.30
   1 -16   0   20.60    2.40
  -1 -16   0   25.60    2.20
   1 -16   0   19.60    1.30
  -1  16   0   19.80    1.70
   1  16   0   25.00    2.60
  -1  16   0   20.20    2.10
  -1  16   0   22.00    2.40
  -1  16   0   18.60    2.50
   1  16   0   26.50    1.60
   1  16   0   26.20    2.30
  -1  16   0   20.80    2.40
   1  16   0   28.60    2.00
   1  16   0   21.70    2.60
   1  16   0   26.80    2.10
   2 -16   0   28.80    2.50
   2 -16   0   32.00    3.30
  -2 -16   0   31.90    3.10
   2 -16   0   32.20    2.90
  -2 -16   0   28.30    2.20
   2 -16   0   31.20    3.90
  -2 -16   0   27.80    2.60
  -2 -16   0   30.40    2.90
   2 -16   0   30.10    3.30
   2  16   0   28.80    2.20
  -2  16   0   34.60    2.90
   2  16   0   28.70    2.70
   2  16   0   32.50    3.30
   2  16   0   28.50    3.40
  -2  16   0   27.70    3.20
  -2  16   0   31.20    2.70
   2  16   0   33.20    2.30
  -2  16   0   31.80    3.30
   3 -16   0   24.60    3.70
  -3 -16   0   23.10    3.50
   3 -16   0   19.60    3.30
   3 -16   0   18.10    3.20
   3 -16   0   25.20    2.70
  -3 -16   0   26.70    2.40
   3 -16   0   22.00    3.40
  -3 -16   0   24.00    3.00
  -3  16   0   24.20    3.20
   3  16   0   28.60    3.50
   3  16   0   20.40    3.50
   3  16   0   20.40    3.30
  -3  16   0   24.60    3.60
  -3  16   0   18.50    3.30
  -3  16   0   21.90    3.20
   3  16   0   25.40    3.40
   3  16   0   26.30    2.30
  -4 -16   0  266.77   11.90
   4 -16   0  217.88   10.90
   4 -16   0  251.27   11.50
  -4 -16   0  259.87   10.20
  -4 -16   0  253.87   11.00
   4 -16   0  237.88   11.40
   4 -16   0  246.58   10.80
   4 -16   0  237.68   12.20
   4  16   0  235.58   11.20
  -4  16   0  247.28   11.00
  -4  16   0  247.78   11.50
  -4  16   0  244.78   11.50
   4  16   0  235.08   11.00
  -4  16   0  261.67   10.70
   4  16   0  238.18   11.60
   4  16   0  256.37   11.20
  -5 -16   0  101.89    7.30
   5 -16   0  103.59    6.90
   5 -16   0   87.99    7.50
   5 -16   0   90.89    6.50
   5 -16   0  115.59    7.60
  -5 -16   0  110.19    7.50
   5 -16   0  111.09    7.70
   5  16   0  108.29    7.40
  -5  16   0  103.89    6.70
  -5  16   0  101.39    7.30
  -5  16   0   95.59    6.70
   5  16   0  104.39    7.20
  -5  16   0  107.99    7.60
   5  16   0  126.09    8.00
   5  16   0  105.79    7.50
  -6 -16   0    6.70    2.80
   6 -16   0    6.00    4.20
   6 -16   0   11.30    4.30
  -6 -16   0    3.70    3.00
   6 -16   0    5.70    4.50
  -6 -16   0    2.40    3.20
  -6  16   0    4.80    3.40
   6  16   0    1.30    2.70
  -6  16   0    0.50    3.80
   6  16   0    0.20    3.70
   6  16   0    1.90    3.10
  -6  16   0   -0.60    3.40
   7 -16   0    4.80    4.70
  -7 -16   0    5.40    4.80
   7 -16   0   -0.70    3.20
  -7 -16   0    2.80    3.80
  -7 -16   0    4.00    4.40
   7 -16   0    2.80    3.30
   7  16   0    2.90    4.70
  -7  16   0    7.10    4.20
   7  16   0    1.10    4.10
  -7  16   0   -1.20    4.10
   7  16   0    6.40    4.40
  -7  16   0    6.50    3.30
   0 -17   0   -1.40    1.10
   0 -17   0    2.40    1.30
   0 -17   0    0.50    1.20
   0 -17   0    0.20    1.60
   0 -17   0    0.70    0.90
   0  17   0   -1.00    1.70
   0  17   0    0.90    1.40
   0  17   0    1.10    1.10
   0  17   0    0.90    1.20
   0  17   0   -0.10    1.20
   0  17   0    1.20    1.00
   1 -17   0  137.99    4.70
   1 -17   0  115.49    5.30
  -1 -17   0  120.69    5.60
  -1 -17   0  115.09    5.40
   1 -17   0  127.49    6.70
  -1 -17   0  126.09    4.80
   1 -17   0  118.09    5.90
  -1 -17   0  125.19    5.30
  -1 -17   0  127.09    6.30
   1 -17   0  121.99    5.80
   1  17   0  120.09    5.80
  -1  17   0  129.29    5.90
  -1  17   0  122.59    5.20
   1  17   0  120.39    5.30
  -1  17   0  116.39    5.80
   1  17   0  126.99    5.60
   1  17   0  127.59    6.40
  -1  17   0  119.89    5.70
  -1  17   0  116.69    6.00
   1  17   0  123.39    4.80
   1  17   0  128.89    5.20
   2 -17   0   83.59    5.50
   2 -17   0   87.29    5.20
  -2 -17   0   93.99    5.50
  -2 -17   0   96.19    4.30
   2 -17   0   89.29    4.60
   2 -17   0   92.59    5.30
  -2 -17   0   90.89    4.80
  -2 -17   0   91.89    4.80
   2 -17   0   95.99    5.40
   2  17   0   96.19    4.30
   2  17   0   86.19    5.60
  -2  17   0   93.19    5.30
  -2  17   0   89.09    5.20
   2  17   0   92.49    5.40
  -2  17   0   88.79    4.90
   2  17   0   84.79    4.80
  -2  17   0   89.89    5.30
   2  17   0   93.89    4.30
  -3 -17   0  176.88    8.20
   3 -17   0  163.58    8.50
  -3 -17   0  181.48    8.90
   3 -17   0  170.58    9.20
   3 -17   0  188.78    8.80
   3 -17   0  173.58    8.40
  -3 -17   0  183.18    7.20
   3 -17   0  170.58    7.90
  -3  17   0  177.28    8.60
   3  17   0  192.28    8.50
  -3  17   0  168.18    8.10
   3  17   0  180.68    9.10
   3  17   0  173.58    8.60
  -3  17   0  170.48    8.10
  -3  17   0  176.18    8.50
   3  17   0  174.58    8.80
   3  17   0  188.68    7.50
  -4 -17   0    0.60    2.10
   4 -17   0    4.40    2.40
   4 -17   0    6.80    3.20
   4 -17   0    1.40    2.20
  -4 -17   0    3.00    2.50
   4 -17   0    7.60    3.40
   4 -17   0    1.70    2.60
   4  17   0    3.10    2.50
  -4  17   0    9.80    3.40
  -4  17   0    3.20    2.40
   4  17   0    6.20    2.60
  -4  17   0    2.80    2.80
   4  17   0    3.80    2.80
  -4  17   0   -0.70    2.20
   4  17   0    0.50    2.90
  -5 -17   0   12.60    3.90
   5 -17   0   10.90    3.30
   5 -17   0    7.70    3.00
   5 -17   0    7.90    3.10
   5 -17   0   12.50    3.80
  -5 -17   0   16.50    4.50
   5 -17   0    8.40    4.30
   5  17   0   14.80    3.80
   5  17   0   19.20    4.40
  -5  17   0    8.70    2.70
   5  17   0   16.90    4.10
  -5  17   0   13.40    3.40
  -5  17   0   14.30    3.50
   5  17   0    8.60    3.20
  -5  17   0   19.10    4.30
   6 -17   0    0.70    4.20
  -6 -17   0    4.10    3.10
   6 -17   0    6.50    4.10
  -6 -17   0    1.80    4.20
  -6 -17   0   -1.20    3.30
   6 -17   0    3.40    3.20
  -6  17   0    0.60    3.80
  -6  17   0    4.10    2.70
   6  17   0    4.30    3.90
   6  17   0    6.90    3.50
   6  17   0    7.10    4.20
  -6  17   0    1.00    3.00
  -7 -17   0   42.70    6.70
  -7 -17   0   55.79    7.20
   7 -17   0   36.70    7.70
   7 -17   0   36.70    6.20
   7 -17   0   42.40    6.30
  -7 -17   0   39.50    5.60
   7  17   0   51.59    7.40
  -7  17   0   43.20    6.00
   7  17   0   50.69    6.90
  -7  17   0   47.90    6.00
   7  17   0   38.70    5.90
  -7  17   0   31.90    5.70
   0 -18   0   54.69    3.00
   0 -18   0   63.09    4.20
   0 -18   0   68.99    3.50
   0 -18   0   59.19    3.60
   0 -18   0   64.39    3.60
   0  18   0   58.19    3.40
   0  18   0   59.99    3.50
   0  18   0   56.39    3.10
   1 -18   0    8.10    2.00
  -1 -18   0    8.30    1.70
  -1 -18   0    9.70    2.00
   1 -18   0    9.60    2.50
  -1 -18   0    8.40    2.30
  -1 -18   0    8.90    1.60
  -1  18   0   11.60    2.00
   1  18   0    8.70    1.50
   1  18   0   12.20    2.40
   1  18   0   11.10    1.90
   1  18   0    7.10    2.00
   1  18   0    8.30    1.60
  -1  18   0   12.50    2.10
   2 -18   0   45.90    3.60
   2 -18   0   49.10    4.70
   2 -18   0   44.40    3.60
  -2 -18   0   60.59    4.10
   2 -18   0   50.19    4.10
  -2 -18   0   55.49    3.20
   2 -18   0   43.80    3.30
  -2 -18   0   53.09    3.50
  -2 -18   0   64.59    4.60
   2  18   0   59.59    3.10
   2  18   0   53.99    4.00
   2  18   0   66.19    4.50
  -2  18   0   46.20    4.00
   2  18   0   58.19    3.20
  -2  18   0   52.29    4.10
  -2  18   0   51.39    3.80
  -2  18   0   47.80    3.90
   2  18   0   57.09    4.60
   3 -18   0    7.10    3.20
  -3 -18   0    9.20    2.20
   3 -18   0   10.40    2.20
   3 -18   0    6.40    2.80
   3 -18   0    5.10    2.90
  -3 -18   0   12.00    3.10
  -3 -18   0    7.40    1.90
   3 -18   0    4.40    2.10
  -3 -18   0    7.00    2.70
   3  18   0    4.30    2.20
   3  18   0    5.70    3.00
  -3  18   0    7.80    2.60
   3  18   0    8.70    2.50
  -3  18   0    4.70    2.10
  -3  18   0    4.40    2.90
  -3  18   0   10.70    2.90
   3  18   0   11.30    3.20
   4 -18   0   19.60    4.00
   4 -18   0   18.30    4.60
   4 -18   0   15.70    3.20
  -4 -18   0   15.20    4.00
   4 -18   0   15.00    3.20
  -4 -18   0   15.10    3.60
   4 -18   0   14.30    3.00
   4  18   0    3.00    3.50
  -4  18   0   12.70    3.10
   4  18   0   17.80    4.00
  -4  18   0   23.30    4.20
  -4  18   0   17.20    3.50
   4  18   0   12.40    3.60
   4  18   0   14.80    3.30
   5 -18   0   19.20    4.60
  -5 -18   0   19.10    3.60
   5 -18   0   26.10    4.50
   5 -18   0   21.40    5.50
   5 -18   0   16.50    4.30
  -5 -18   0   21.60    4.40
   5 -18   0   24.00    4.20
  -5 -18   0   22.20    3.90
   5  18   0   19.10    4.00
  -5  18   0   18.30    4.00
   5  18   0   22.50    4.30
  -5  18   0   23.90    4.70
   5  18   0   19.10    4.00
  -5  18   0   20.10    4.40
   5  18   0   19.40    3.90
  -6 -18   0    3.10    3.10
  -6 -18   0    1.20    4.30
   6 -18   0    3.60    4.30
  -6 -18   0    6.20    2.90
   6 -18   0    5.60    4.30
   6 -18   0   -3.10    3.70
  -6  18   0    6.40    3.70
  -6  18   0    2.60    4.10
   6  18   0   -1.40    2.50
   6  18   0    0.50    4.10
  -6  18   0   -3.40    3.70
   6  18   0    2.00    4.20
   7 -18   0   15.00    5.80
  -7 -18   0   11.60    5.70
  -7 -18   0   10.60    5.10
  -7 -18   0   22.10    5.00
   7 -18   0    3.60    3.60
   7 -18   0   12.80    5.80
  -7  18   0   12.10    4.40
  -7  18   0    6.00    3.60
   7  18   0   22.00    6.20
  -7  18   0    7.60    4.80
   7  18   0   13.00    5.10
   7  18   0    9.10    5.20
   0 -19   0   16.40    2.80
   0  19   0    2.90    1.30
   1 -19   0    6.90    1.90
   1 -19   0    8.10    1.70
   1 -19   0    4.90    1.70
  -1 -19   0    4.90    1.50
  -1 -19   0    8.40    2.10
   1 -19   0    5.50    2.40
  -1 -19   0    2.50    1.50
  -1 -19   0    5.10    1.80
  -1  19   0    7.10    1.60
  -1  19   0    7.60    2.20
   1  19   0    5.60    2.60
  -1  19   0    5.10    2.30
  -1  19   0    6.90    2.00
   1  19   0    7.10    1.50
   1  19   0    8.10    1.90
   1  19   0    3.30    1.60
   1  19   0    7.90    1.90
  -1  19   0    2.40    1.70
   2 -19   0   19.60    3.30
   2 -19   0   25.90    2.70
  -2 -19   0   20.60    3.00
  -2 -19   0   16.60    2.40
   2 -19   0   21.90    2.90
  -2 -19   0   19.20    2.30
  -2 -19   0   17.70    2.90
   2 -19   0   18.50    3.00
   2  19   0   20.30    3.30
  -2  19   0   26.60    3.30
   2  19   0   23.30    2.30
  -2  19   0   18.40    3.00
   2  19   0   21.90    3.10
   2  19   0   23.10    3.80
  -2  19   0   16.90    3.00
  -2  19   0   24.10    3.30
   2  19   0   20.40    2.30
  -3 -19   0    1.10    1.70
   3 -19   0   -1.80    2.70
   3 -19   0    4.10    2.70
  -3 -19   0    4.20    2.10
   3 -19   0   -5.90    2.40
  -3 -19   0    5.70    2.90
  -3 -19   0    0.70    2.70
  -3  19   0    1.40    2.70
   3  19   0    3.70    2.20
  -3  19   0   -1.40    2.80
   3  19   0    7.30    3.00
  -3  19   0    8.70    2.70
  -3  19   0    1.10    2.50
   3  19   0    7.80    2.60
   4 -19   0  102.09    7.10
   4 -19   0   99.49    7.10
   4 -19   0   97.79    7.10
   4 -19   0   94.49    8.10
  -4 -19   0  103.79    6.70
   4 -19   0   94.19    6.00
  -4 -19   0  111.39    7.60
  -4 -19   0  107.99    7.00
   4  19   0  106.49    6.80
   4  19   0  112.19    7.30
  -4  19   0  111.19    6.30
  -4  19   0  106.59    6.40
   4  19   0   90.69    6.60
  -4  19   0  104.09    7.10
   4  19   0  108.19    7.10
  -4  19   0  104.19    7.20
  -5 -19   0    1.70    3.20
   5 -19   0    1.00    3.90
   5 -19   0    0.80    3.40
   5 -19   0    4.30    3.70
  -5 -19   0    1.60    3.80
   5 -19   0    6.10    3.40
  -5 -19   0    1.70    2.50
   5  19   0    0.20    2.60
  -5  19   0    1.60    3.40
   5  19   0    4.20    3.30
   5  19   0   -1.80    3.10
  -5  19   0    2.60    2.90
   5  19   0    2.60    2.80
  -5  19   0    2.50    3.40
  -6 -19   0    6.90    3.70
  -6 -19   0    1.80    3.40
   6 -19   0   -1.40    3.80
   6 -19   0   15.90    5.60
   6 -19   0    7.60    4.50
  -6 -19   0    4.70    4.00
   6  19   0    1.40    4.40
  -6  19   0    7.20    3.70
   6  19   0    8.40    4.20
  -6  19   0   -2.40    3.90
  -6  19   0   -3.20    3.60
   6  19   0    5.30    4.50
   7 -19   0    0.30    4.80
   7 -19   0   -4.00    4.30
   7 -19   0    0.20    3.40
  -7 -19   0    1.30    4.40
  -7 -19   0    7.30    3.50
  -7 -19   0    0.50    5.10
   7  19   0    3.70    5.20
  -7  19   0    1.30    4.30
  -7  19   0    0.30    4.40
  -7  19   0    0.00    3.80
   7  19   0    1.20    4.70
   7  19   0   -1.60    3.10
   0 -20   0    1.40    1.50
   0 -20   0    3.20    1.50
   0 -20   0    0.80    1.20
   0 -20   0    3.10    1.70
   0 -20   0    2.40    1.70
   0  20   0    2.70    1.80
   0  20   0    3.00    1.60
   0  20   0    4.90    1.90
   0  20   0    0.80    1.30
   0  20   0    1.70    1.40
   0  20   0    1.50    1.80
   1 -20   0   64.79    4.30
   1 -20   0   61.89    4.10
  -1 -20   0   62.29    3.70
  -1 -20   0   68.69    3.70
  -1 -20   0   64.69    4.40
   1 -20   0   59.89    4.90
  -1 -20   0   71.59    4.20
   1 -20   0   59.19    3.70
  -1  20   0   59.09    4.00
   1  20   0   60.99    4.90
  -1  20   0   62.09    3.70
   1  20   0   67.59    3.60
  -1  20   0   66.19    4.40
   1  20   0   59.39    4.40
   1  20   0   59.49    3.70
  -1  20   0   63.99    4.80
  -1  20   0   60.69    4.10
   1  20   0   59.39    3.80
  -2 -20   0   78.29    5.10
   2 -20   0   85.19    5.10
  -2 -20   0   92.79    6.10
   2 -20   0   83.09    5.20
  -2 -20   0   96.89    4.60
   2 -20   0   84.09    4.70
  -2 -20   0   79.99    4.70
   2 -20   0   87.49    6.00
   2  20   0   85.59    4.30
  -2  20   0   87.89    5.50
  -2  20   0   87.99    5.60
   2  20   0   96.29    6.30
  -2  20   0   83.89    5.50
   2  20   0   87.59    5.30
   2  20   0   90.19    4.50
   2  20   0   88.69    5.40
  -2  20   0   83.99    5.40
   3 -20   0   48.20    4.60
   3 -20   0   55.39    5.90
  -3 -20   0   53.29    4.60
   3 -20   0   51.29    5.30
  -3 -20   0   40.90    4.10
   3 -20   0   53.69    5.20
   3 -20   0   56.99    4.10
  -3 -20   0   55.39    4.60
   3  20   0   53.09    5.00
   3  20   0   45.50    4.40
  -3  20   0   42.50    4.60
  -3  20   0   46.70    5.20
  -3  20   0   65.99    5.00
   3  20   0   47.80    5.60
   4 -20   0    7.30    3.40
   4 -20   0    9.50    3.70
  -4 -20   0    8.70    2.80
  -4 -20   0   12.50    2.90
   4 -20   0    7.80    4.00
  -4 -20   0   10.60    3.20
   4 -20   0    5.70    3.40
   4 -20   0    7.70    2.80
  -4  20   0    7.60    2.90
  -4  20   0    8.40    3.50
   4  20   0    7.70    2.90
   4  20   0    8.80    3.00
   4  20   0    7.20    3.60
  -4  20   0   12.20    2.90
   4  20   0    9.30    3.20
  -4  20   0    7.00    3.40
   5 -20   0   24.20    4.50
  -5 -20   0   20.00    4.90
  -5 -20   0   10.50    3.80
   5 -20   0   18.40    4.60
  -5 -20   0   13.90    3.40
   5 -20   0   15.60    5.20
   5 -20   0   22.40    4.60
   5  20   0   18.00    4.60
   5  20   0   27.10    4.70
  -5  20   0   20.10    3.60
  -5  20   0   15.80    4.40
   5  20   0   21.80    4.20
   5  20   0   17.00    4.40
  -5  20   0   16.70    4.50
   6 -20   0    2.50    3.30
  -6 -20   0    0.90    3.90
  -6 -20   0   -1.60    4.00
  -6 -20   0   -0.60    2.20
   6 -20   0   -5.90    3.80
   6 -20   0    3.10    3.20
   6  20   0    1.00    4.20
   6  20   0    1.60    2.80
  -6  20   0   -2.40    2.80
   6  20   0   -0.90    4.20
  -6  20   0    1.80    2.70
  -6  20   0   -2.90    2.70
   0 -21   0    2.80    1.60
   0 -21   0    1.10    1.70
   0 -21   0    3.50    2.40
   0 -21   0    3.40    1.70
   0  21   0    5.50    2.00
   0  21   0    6.40    2.80
   0  21   0   -2.40    1.60
   0  21   0    0.30    1.90
   0  21   0   -1.30    1.30
   0  21   0   -1.00    1.50
   1 -21   0   22.70    2.60
   1 -21   0   17.70    2.90
  -1 -21   0   20.00    2.80
  -1 -21   0   20.10    3.10
   1 -21   0   16.10    2.60
  -1 -21   0   18.90    2.60
   1 -21   0   19.20    3.60
  -1 -21   0   19.40    2.50
   1  21   0   23.30    2.70
  -1  21   0   14.40    2.70
  -1  21   0   20.00    3.10
  -1  21   0   23.60    3.30
   1  21   0   21.20    2.70
  -1  21   0   17.30    2.70
   1  21   0   19.40    3.20
   1  21   0   22.40    3.70
   1  21   0   21.00    2.40
  -1  21   0   24.00    2.60
  -2 -21   0   91.29    4.50
   2 -21   0   82.89    6.50
  -2 -21   0   88.59    4.90
   2 -21   0   82.89    5.30
  -2 -21   0   94.69    6.10
   2 -21   0   97.19    5.80
  -2 -21   0   79.99    4.90
   2 -21   0   88.69    4.90
  -2  21   0   81.59    5.60
   2  21   0   90.29    6.40
   2  21   0   85.09    5.80
   2  21   0   80.29    5.30
  -2  21   0   82.79    5.20
   2  21   0   86.39    4.50
  -2  21   0   82.39    5.70
  -2  21   0   81.19    5.10
   3 -21   0  153.68    8.30
  -3 -21   0  133.99    7.30
   3 -21   0  139.09    8.00
  -3 -21   0  153.78    8.50
   3 -21   0  141.89    7.60
   3 -21   0  126.49    6.90
  -3 -21   0  146.99    7.60
   3 -21   0  129.49    8.50
  -3  21   0  141.69    7.60
  -3  21   0  144.59    7.80
  -3  21   0  143.69    8.10
  -3  21   0  144.29    7.80
   3  21   0  129.59    7.70
   3  21   0  135.89    8.10
   3  21   0  159.08    8.10
   4 -21   0   -2.60    2.00
  -4 -21   0   -3.30    2.90
   4 -21   0   -3.10    3.00
   4 -21   0   -1.70    3.50
   4 -21   0   -4.00    1.90
  -4 -21   0   -4.10    1.80
   4 -21   0    0.80    2.90
  -4 -21   0   -3.70    1.80
  -4  21   0   -2.00    3.00
   4  21   0    0.40    2.40
   4  21   0   -2.30    2.20
  -4  21   0   -1.70    2.60
  -4  21   0    0.20    2.30
  -4  21   0    0.30    2.50
   4  21   0    2.60    2.50
   4  21   0   -0.80    2.90
   5 -21   0    4.40    4.00
   5 -21   0    0.00    3.30
   5 -21   0    0.60    4.20
   5 -21   0    1.00    2.90
  -5 -21   0    2.40    2.60
  -5 -21   0    3.00    3.10
  -5 -21   0    8.10    3.10
  -5  21   0    8.90    3.60
  -5  21   0    5.00    3.00
   5  21   0    7.90    3.40
   5  21   0    3.80    3.40
   5  21   0    4.20    2.80
  -5  21   0    5.10    3.80
   5  21   0    2.90    3.10
   6 -21   0    5.50    4.60
  -6 -21   0   11.00    5.20
   6 -21   0    8.20    4.30
  -6 -21   0   14.90    4.80
   6 -21   0    3.10    3.50
  -6 -21   0    9.60    4.10
   6  21   0   10.70    5.00
  -6  21   0    1.30    4.20
   6  21   0    9.10    4.70
   6  21   0   11.50    5.10
  -6  21   0   12.60    4.30
  -6  21   0    4.00    4.10
   0 -22   0    1.40    1.80
   0 -22   0    1.50    1.30
   0 -22   0    1.10    1.90
   0 -22   0   -0.20    1.60
   0  22   0    0.80    1.90
   0  22   0    1.80    2.00
   0  22   0   -0.90    1.90
   0  22   0   -1.10    1.50
  -1 -22   0  110.79    5.60
  -1 -22   0  114.09    6.80
  -1 -22   0  114.49    5.90
   1 -22   0  110.19    5.80
   1 -22   0   98.29    6.50
  -1 -22   0  107.09    5.30
   1 -22   0  102.29    5.20
   1 -22   0  108.69    6.00
  -1  22   0  106.69    5.80
   1  22   0  111.49    6.60
  -1  22   0  106.59    5.80
   1  22   0  106.69    5.40
  -1  22   0  107.79    5.80
  -1  22   0  123.69    6.90
   1  22   0  114.99    5.50
   1  22   0  113.49    6.30
   1  22   0  103.59    5.20
  -2 -22   0   11.50    2.50
   2 -22   0   10.00    2.20
  -2 -22   0   11.90    3.40
  -2 -22   0   11.00    2.40
   2 -22   0    2.80    2.10
  -2 -22   0    5.40    2.10
   2 -22   0    9.50    3.50
   2 -22   0    5.30    2.70
   2  22   0    5.00    3.00
  -2  22   0    8.70    2.90
  -2  22   0    6.60    2.30
  -2  22   0    7.30    3.00
  -2  22   0    5.60    2.70
   2  22   0   12.30    3.70
   2  22   0    5.80    2.50
   3 -22   0  185.98    9.10
  -3 -22   0  219.28   10.80
  -3 -22   0  202.08    9.70
   3 -22   0  204.08    9.90
   3 -22   0  210.68    9.90
   3 -22   0  208.78   11.70
  -3 -22   0  208.48    9.90
   3 -22   0  202.28   10.30
   3  22   0  199.38   10.40
   3  22   0  220.48   10.20
  -3  22   0  191.98    9.50
  -3  22   0  213.88   10.10
  -3  22   0  213.38    9.80
  -3  22   0  208.18   10.20
   3  22   0  200.48   10.50
  -4 -22   0   33.60    4.30
   4 -22   0   27.20    4.80
   4 -22   0   22.80    4.60
   4 -22   0   33.40    4.70
   4 -22   0   31.00    6.00
  -4 -22   0   33.30    5.20
  -4 -22   0   26.20    4.30
  -4  22   0   27.70    4.50
  -4  22   0   31.70    4.90
   4  22   0   31.50    4.70
   4  22   0   33.20    5.40
  -4  22   0   39.30    5.00
   4  22   0   28.70    4.70
  -4  22   0   27.50    4.70
  -5 -22   0   -6.90    3.00
   5 -22   0    2.10    3.10
   5 -22   0   -5.20    3.50
   5 -22   0    2.90    3.80
  -5 -22   0    4.70    3.90
  -5 -22   0    4.70    3.50
   5  22   0   -4.40    3.60
   5  22   0   -3.10    2.50
  -5  22   0    2.80    3.40
  -5  22   0   -1.80    3.80
   5  22   0   -0.40    3.40
   5  22   0   -5.50    3.30
   6 -22   0   10.10    4.90
  -6 -22   0    4.40    4.70
   6 -22   0    0.40    4.60
   6 -22   0    2.10    4.50
  -6 -22   0    4.90    4.30
  -6 -22   0   11.10    4.30
  -6  22   0    7.00    4.70
  -6  22   0    6.10    4.10
   6  22   0    1.60    4.50
   6  22   0    1.10    4.20
  -6  22   0   11.20    4.90
   6  22   0    5.50    4.80
   0 -23   0   -3.20    2.40
   0 -23   0    0.70    2.00
   0 -23   0   -2.00    1.60
   0  23   0    1.50    2.10
   0  23   0    2.40    2.20
   0  23   0    4.70    2.80
   0  23   0    0.40    1.90
   1 -23   0   97.19    6.40
   1 -23   0   95.19    5.20
   1 -23   0   98.69    5.90
   1 -23   0   98.29    5.80
  -1 -23   0  101.29    5.70
  -1 -23   0  105.39    6.80
  -1 -23   0   98.59    5.40
  -1 -23   0   95.49    5.30
  -1  23   0   95.99    5.60
   1  23   0   94.79    5.30
  -1  23   0  101.09    5.90
   1  23   0  101.99    6.20
  -1  23   0  100.99    6.00
  -1  23   0  107.29    6.70
   1  23   0   98.39    5.20
   1  23   0  103.79    5.10
   1  23   0  111.79    7.00
  -2 -23   0    4.50    2.30
   2 -23   0    1.70    1.80
   2 -23   0    0.10    3.10
  -2 -23   0   -1.10    1.70
  -2 -23   0   -0.20    2.90
   2 -23   0    4.10    2.70
   2 -23   0    0.50    2.60
   2  23   0    5.50    2.50
   2  23   0    0.40    2.10
  -2  23   0    1.70    2.60
  -2  23   0    2.60    2.70
   2  23   0    0.40    3.10
  -2  23   0    2.40    3.00
  -2  23   0    6.60    3.00
   3 -23   0   53.09    6.80
  -3 -23   0   56.79    5.20
   3 -23   0   47.50    4.30
   3 -23   0   58.79    5.50
   3 -23   0   57.09    5.50
  -3 -23   0   65.29    6.00
  -3 -23   0   43.00    4.80
  -3  23   0   48.90    4.50
  -3  23   0   63.49    5.40
   3  23   0   62.59    5.80
  -3  23   0   61.59    5.50
  -3  23   0   49.40    5.50
   3  23   0   55.19    6.00
   3  23   0   52.19    5.40
   4 -23   0    1.10    3.90
   4 -23   0   -1.00    2.40
   4 -23   0    0.30    2.30
  -4 -23   0    2.70    2.60
  -4 -23   0   -3.00    2.70
  -4 -23   0   -1.70    2.90
   4 -23   0    5.00    3.20
  -4  23   0    4.00    2.70
   4  23   0   -0.80    3.20
  -4  23   0   -0.50    2.40
  -4  23   0   -4.40    3.10
   4  23   0    4.10    3.60
   4  23   0   -0.10    3.40
  -4  23   0    0.10    2.70
  -5 -23   0   11.40    4.10
  -5 -23   0   10.00    4.20
   5 -23   0   11.30    4.60
   5 -23   0    8.60    5.00
   5 -23   0   14.40    4.80
  -5 -23   0   13.60    4.80
  -5  23   0   14.30    4.60
   5  23   0   17.90    5.20
   5  23   0   22.70    5.30
   5  23   0    9.20    4.40
  -5  23   0   15.10    3.70
  -6 -23   0   30.80    6.40
  -6 -23   0   29.50    5.90
  -6 -23   0   26.40    4.70
   6 -23   0   20.20    5.60
   6 -23   0   20.40    5.90
   6 -23   0   35.10    6.70
   6  23   0   22.20    6.00
  -6  23   0   34.40    5.80
   6  23   0   29.80    5.30
  -6  23   0   25.80    5.90
  -6  23   0   11.10    5.10
   6  23   0   33.10    6.50
   0 -24   0  324.17   14.10
   0 -24   0  331.27   12.60
   0 -24   0  316.47   12.80
   0  24   0  324.37   12.90
   0  24   0  313.87   12.70
   0  24   0  313.17   13.80
   0  24   0  331.67   12.40
  -1 -24   0   47.40    4.10
   1 -24   0   44.00    5.50
   1 -24   0   43.90    4.30
  -1 -24   0   45.60    5.20
   1 -24   0   42.60    3.60
   1 -24   0   46.00    4.00
  -1 -24   0   48.00    3.80
  -1  24   0   43.50    4.00
   1  24   0   49.90    3.70
   1  24   0   50.89    3.80
  -1  24   0   49.99    4.50
  -1  24   0   49.50    4.10
   1  24   0   51.69    5.40
   1  24   0   56.69    4.70
  -1  24   0   50.09    4.50
  -2 -24   0  212.48    9.80
   2 -24   0  221.28   11.90
   2 -24   0  202.78    9.50
  -2 -24   0  205.68    9.70
   2 -24   0  241.38   10.60
  -2 -24   0  233.28   11.20
   2 -24   0  210.18   10.50
   2  24   0  223.38   10.90
  -2  24   0  225.08   10.50
  -2  24   0  212.78   10.50
  -2  24   0  248.98   10.50
   2  24   0  248.18   12.10
  -2  24   0  246.68   10.70
   2  24   0  225.58   10.10
  -3 -24   0   87.49    6.20
   3 -24   0   83.59    6.60
  -3 -24   0   79.09    6.70
   3 -24   0   78.99    6.90
   3 -24   0   70.89    5.20
  -3 -24   0   83.39    6.00
   3 -24   0   94.59    6.10
   3  24   0   83.89    6.20
  -3  24   0   91.49    6.50
  -3  24   0   84.89    6.50
   3  24   0   94.39    7.50
   3  24   0   80.49    6.10
  -3  24   0   82.99    6.20
  -3  24   0   93.19    6.60
  -4 -24   0   14.30    3.90
  -4 -24   0   11.20    3.70
   4 -24   0   16.20    4.00
   4 -24   0   12.70    4.20
  -4 -24   0   13.50    4.20
   4 -24   0    9.50    3.30
   4 -24   0    7.20    4.70
  -4  24   0    8.20    3.60
  -4  24   0    7.60    3.90
   4  24   0   13.70    4.10
  -4  24   0    7.00    2.90
   4  24   0   10.90    4.50
  -4  24   0   14.60    4.10
   4  24   0   11.90    4.30
   5 -24   0   13.60    4.00
  -5 -24   0   14.60    5.00
  -5 -24   0   11.00    4.30
   5 -24   0   16.10    5.10
  -5 -24   0   12.60    3.60
   5 -24   0   10.60    5.20
   5  24   0   14.50    4.80
  -5  24   0   13.50    4.00
   5  24   0   12.10    3.70
  -5  24   0   20.80    4.70
   5  24   0   15.90    5.30
   6 -24   0    8.50    5.80
  -6 -24   0   13.80    4.90
   6 -24   0   12.80    4.30
  -6 -24   0   15.40    4.70
  -6 -24   0    7.50    4.30
   6 -24   0   13.10    5.20
  -6  24   0    3.90    4.60
  -6  24   0   10.00    4.10
  -6  24   0    9.70    4.50
   6  24   0   11.80    5.60
   6  24   0   16.30    5.30
   0 -25   0    5.00    2.20
   0 -25   0    2.80    2.30
   0 -25   0    2.70    3.10
   0  25   0    9.90    2.80
   0  25   0    8.40    2.60
   0  25   0    4.10    2.00
   0  25   0   10.10    3.50
   1 -25   0    8.70    2.60
  -1 -25   0    5.90    2.80
   1 -25   0    8.70    2.80
   1 -25   0   10.80    2.40
  -1 -25   0    7.40    2.60
   1 -25   0    7.70    3.60
  -1 -25   0    3.20    2.30
   1  25   0    6.10    3.00
  -1  25   0    9.40    2.60
   1  25   0    5.60    2.90
  -1  25   0    7.20    2.90
  -1  25   0    7.20    2.50
   1  25   0    7.40    2.40
  -1  25   0    9.00    2.60
  -2 -25   0  423.86   16.90
   2 -25   0  446.36   17.70
   2 -25   0  376.66   16.40
   2 -25   0  453.15   17.50
  -2 -25   0  459.55   18.40
   2 -25   0  439.46   19.30
  -2 -25   0  428.16   16.80
   2  25   0  443.56   17.00
  -2  25   0  474.25   18.50
   2  25   0  489.35   19.50
  -2  25   0  438.16   17.40
   2  25   0  417.16   17.60
  -2  25   0  426.56   17.20
  -2  25   0  460.85   17.40
  -3 -25   0   33.80    4.50
  -3 -25   0   35.90    4.70
   3 -25   0   34.70    4.90
  -3 -25   0   35.60    4.90
   3 -25   0   29.50    5.20
   3 -25   0   36.30    5.10
  -3  25   0   39.00    5.00
  -3  25   0   42.80    5.30
   3  25   0   31.20    4.70
   3  25   0   46.60    5.10
  -3  25   0   34.80    5.00
   3  25   0   39.70    6.10
  -3  25   0   37.10    5.00
   4 -25   0   16.50    4.50
   4 -25   0   15.80    3.90
  -4 -25   0   18.10    4.10
   4 -25   0   14.20    4.60
  -4 -25   0   15.60    3.50
  -4 -25   0   19.00    4.70
   4  25   0   18.90    4.90
  -4  25   0   20.90    4.50
   4  25   0    8.00    3.10
  -4  25   0   27.00    4.90
  -4  25   0   21.30    5.20
   4  25   0   15.30    4.20
  -4  25   0   19.00    4.40
  -5 -25   0   23.20    5.10
   5 -25   0   13.50    5.00
   5 -25   0    5.60    4.90
   5 -25   0    7.50    4.50
  -5 -25   0    8.60    4.00
  -5 -25   0   11.40    4.80
  -5  25   0   14.80    4.60
   5  25   0   11.10    4.70
   5  25   0   13.00    4.70
  -5  25   0    9.10    4.50
   5  25   0   20.80    5.70
   6 -25   0   -0.30    3.90
  -6 -25   0    1.40    4.00
  -6 -25   0   -5.40    4.00
  -6 -25   0    0.60    4.70
   6 -25   0   -3.90    4.30
   6 -25   0   -1.50    3.30
   6  25   0    0.90    4.40
  -6  25   0   -3.30    3.00
  -6  25   0    6.30    4.60
   6  25   0   -1.10    5.20
  -6  25   0   -1.50    2.90
   0 -26   0   66.19    5.50
   0 -26   0   74.09    5.00
   0 -26   0   69.69    4.70
   0  26   0   62.89    5.30
   0  26   0   73.19    5.30
   0  26   0   72.99    5.70
   0  26   0   70.19    5.00
   1 -26   0  130.69    6.60
   1 -26   0  132.09    7.40
   1 -26   0  136.69    8.90
   1 -26   0  131.89    7.40
  -1 -26   0  131.69    6.80
  -1 -26   0  128.89    7.90
  -1  26   0  150.38    8.80
  -1  26   0  144.49    7.70
   1  26   0  139.19    7.70
  -1  26   0  135.09    7.30
   1  26   0  136.29    6.90
   1  26   0  142.39    8.90
   2 -26   0   23.40    4.70
   2 -26   0   16.70    3.50
   2 -26   0   15.30    3.70
  -2 -26   0   25.50    4.60
  -2 -26   0   13.80    2.70
   2 -26   0    9.30    2.40
  -2  26   0   24.10    4.60
   2  26   0   18.40    4.20
  -2  26   0   18.40    3.60
  -3 -26   0    0.40    2.80
  -3 -26   0    2.60    2.80
   3 -26   0    1.30    3.30
   3 -26   0   -1.10    3.60
  -3 -26   0    3.70    3.10
   3 -26   0   -4.10    3.00
  -3  26   0    2.50    2.50
   3  26   0    1.60    3.60
  -3  26   0    0.40    3.30
   3  26   0    6.00    4.10
   3  26   0    3.40    2.90
  -3  26   0    8.00    3.70
  -3  26   0    2.90    3.40
  -4 -26   0   12.80    3.90
  -4 -26   0   16.20    4.60
   4 -26   0   12.70    5.30
   4 -26   0   11.80    3.60
  -4 -26   0   18.80    4.20
   4 -26   0   15.60    4.50
  -4  26   0   19.90    4.50
  -4  26   0   11.90    4.30
   4  26   0   13.80    4.10
   4  26   0   16.50    4.20
  -4  26   0    9.60    4.10
   4  26   0   20.00    4.40
  -5 -26   0    7.80    4.00
   5 -26   0    2.40    4.90
  -5 -26   0    7.70    3.80
   5 -26   0    6.80    4.60
  -5 -26   0    4.10    4.10
   5 -26   0    6.00    3.60
  -5  26   0    4.50    4.30
  -5  26   0    8.80    3.50
   5  26   0    1.10    3.90
   5  26   0    4.50    4.90
   5  26   0   11.50    5.00
   0 -27   0   -0.90    2.00
   0 -27   0    1.20    2.30
   0 -27   0   -2.10    3.00
   0  27   0    0.70    3.10
   0  27   0   -1.00    2.40
   0  27   0    5.70    3.60
  -1 -27   0   81.99    5.20
   1 -27   0   81.59    6.70
   1 -27   0   82.59    5.30
  -1 -27   0  102.49    7.40
   1 -27   0   86.39    6.00
   1  27   0   96.19    7.60
  -1  27   0   94.69    6.60
  -1  27   0   92.09    6.30
   1  27   0   90.99    5.50
  -1  27   0   90.09    5.90
   1  27   0   93.49    6.40
   2 -27   0   11.50    3.50
   2 -27   0   10.70    3.40
  -2 -27   0    9.10    2.60
   2 -27   0    8.00    4.10
  -2 -27   0   16.00    4.30
   2 -27   0   10.10    2.60
  -2  27   0   12.20    3.90
  -2  27   0    5.90    3.80
  -2  27   0    5.90    3.30
   2  27   0    9.20    3.60
   2  27   0   12.90    3.10
  -2  27   0    5.70    3.10
   2  27   0   12.60    4.00
   3 -27   0   -2.60    3.60
  -3 -27   0    1.40    2.90
   3 -27   0   -4.20    2.80
  -3 -27   0    0.40    2.80
  -3 -27   0    5.20    2.90
   3 -27   0   -2.80    3.10
   3  27   0   -2.30    2.50
  -3  27   0    2.00    3.40
  -3  27   0   -5.20    3.10
   3  27   0   -3.80    2.70
   3  27   0    2.20    4.10
  -3  27   0   -4.70    2.10
  -3  27   0   -2.60    3.10
   4 -27   0    1.40    3.00
  -4 -27   0   -3.60    3.00
   4 -27   0   -4.30    3.50
  -4 -27   0   -1.40    3.70
   4 -27   0   -1.90    4.30
  -4 -27   0   -2.60    3.10
   4  27   0    1.80    4.10
  -4  27   0    0.50    2.80
  -4  27   0   -7.00    3.30
   4  27   0    2.70    3.50
   4  27   0    3.20    4.00
   5 -27   0   -5.00    4.00
   5 -27   0    4.40    5.10
   5 -27   0   -0.70    3.20
  -5 -27   0    7.70    3.90
  -5 -27   0    2.10    3.40
  -5 -27   0    0.40    3.90
  -5  27   0   -1.10    3.80
   5  27   0   -6.20    2.90
   5  27   0    3.80    4.30
  -5  27   0    0.30    4.10
   5  27   0    3.30    4.10
   0 -28   0    5.00    2.80
   0 -28   0    2.00    2.50
   0 -28   0    2.60    2.30
   0  28   0    2.60    2.90
   0  28   0    5.40    2.90
   1 -28   0    7.00    2.40
   1 -28   0    4.00    2.90
   1 -28   0    4.70    3.80
  -1 -28   0   11.10    2.90
  -1 -28   0   11.90    4.10
   1  28   0    7.00    3.30
   1  28   0    4.90    3.30
  -1  28   0    4.80    3.80
   1  28   0    5.30    2.80
  -1  28   0    7.90    3.10
  -1  28   0    8.60    3.30
   2 -28   0    4.80    4.00
   2 -28   0    1.30    2.90
  -2 -28   0    1.70    2.10
   2 -28   0    7.20    3.50
  -2 -28   0    2.00    3.60
   2  28   0   -1.00    3.40
  -2  28   0    6.40    3.30
  -2  28   0    0.60    3.40
  -2  28   0    2.40    3.10
  -2  28   0    2.00    3.60
   2  28   0    2.80    4.20
   3 -28   0   -0.40    4.00
  -3 -28   0   -0.80    2.80
  -3 -28   0    4.20    3.20
  -3 -28   0    2.60    2.80
   3 -28   0    4.90    3.80
   3 -28   0   -0.40    3.20
   3  28   0   -1.30    3.60
  -3  28   0   -1.70    3.40
  -3  28   0    5.70    3.90
  -3  28   0    9.10    3.80
  -3  28   0    2.40    3.80
   3  28   0    4.70    3.30
   3  28   0    3.50    3.40
  -4 -28   0   -3.40    3.80
   4 -28   0    3.00    3.20
   4 -28   0   -3.50    3.50
  -4 -28   0    2.70    3.60
  -4 -28   0   -3.20    3.20
   4 -28   0    1.60    4.50
   4  28   0   -4.10    3.40
  -4  28   0   -3.60    3.60
  -4  28   0   -3.60    3.50
   4  28   0    2.60    4.40
   4  28   0   -0.20    4.00
   5 -28   0    7.50    5.00
  -5 -28   0   11.90    4.80
  -5 -28   0   18.30    5.70
   5 -28   0   13.20    5.40
   5 -28   0   16.30    4.50
  -5 -28   0   25.60    4.50
   5  28   0   25.30    5.50
   5  28   0   20.70    4.50
   5  28   0   24.30    6.00
  -5  28   0   20.90    5.60
  -5  28   0   17.30    5.20
   0 -29   0   -4.00    3.10
   0 -29   0   -1.20    2.10
   0  29   0   -1.60    3.80
   0  29   0   -1.20    2.50
   1 -29   0   48.90    4.20
  -1 -29   0   50.99    4.70
  -1 -29   0   46.70    5.10
   1 -29   0   47.10    5.20
   1 -29   0   49.99    6.70
   1  29   0   50.69    5.90
   1  29   0   50.39    6.90
  -1  29   0   49.60    5.50
   1  29   0   59.49    5.50
  -1  29   0   49.90    6.50
  -2 -29   0    7.30    4.00
   2 -29   0    4.90    4.20
   2 -29   0    8.90    3.70
   2 -29   0    5.70    3.30
  -2 -29   0    7.30    2.50
  -2  29   0    1.40    3.00
   2  29   0    5.50    4.00
  -2  29   0    9.80    3.60
  -2  29   0    8.60    3.40
  -2  29   0    4.30    2.90
   2  29   0    8.10    4.90
   3 -29   0   25.40    4.40
   3 -29   0   30.50    6.40
   3 -29   0   14.00    4.30
  -3 -29   0   29.00    4.80
  -3 -29   0   18.80    3.90
  -3 -29   0   16.60    4.10
   3  29   0   27.30    5.60
  -3  29   0   20.40    4.90
   3  29   0   22.50    5.00
  -3  29   0   19.60    3.90
   3  29   0   23.10    4.30
  -3  29   0   18.40    4.40
  -3  29   0   20.20    4.30
  -4 -29   0   -4.20    3.20
   4 -29   0    4.30    5.00
   4 -29   0   -4.10    3.80
   4 -29   0    0.20    3.70
  -4 -29   0    2.40    3.60
  -4 -29   0    6.70    4.40
  -4  29   0    1.30    4.10
   4  29   0   -3.80    3.40
  -4  29   0    2.50    4.10
   4  29   0    3.40    3.50
   4  29   0   11.30    5.20
  -5 -29   0    7.40    5.20
   5 -29   0    5.30    3.80
   5 -29   0    3.00    3.70
  -5 -29   0    9.20    4.80
   5 -29   0    6.70    5.70
  -5 -29   0    1.90    4.00
   5  29   0   -1.60    4.10
  -5  29   0    8.60    4.00
   5  29   0    4.50    5.10
  -5  29   0    7.20    4.80
   5  29   0    3.10    4.70
   0 -30   0    8.10    3.50
   0 -30   0   16.70    2.90
   0  30   0    9.50    3.40
   0  30   0    8.70    3.70
   1 -30   0   97.39    7.80
   1 -30   0   99.19    6.60
   1 -30   0   88.69    5.90
  -1 -30   0   98.49    7.90
  -1 -30   0   95.39    6.20
   1  30   0   95.89    8.40
  -1  30   0  100.09    7.40
  -1  30   0   99.79    6.90
   1  30   0   99.39    7.10
   2 -30   0    0.40    4.00
   2 -30   0    2.10    3.10
  -2 -30   0    2.20    2.30
  -2 -30   0    0.10    2.80
  -2  30   0   -1.90    3.90
   2  30   0    0.30    3.60
   2  30   0    4.10    4.80
  -2  30   0    2.00    3.80
  -2  30   0   -1.20    3.00
   3 -30   0   -2.40    3.30
   3 -30   0   -2.10    3.40
  -3 -30   0    5.50    3.20
   3 -30   0    0.00    4.30
  -3 -30   0    5.50    3.20
   3  30   0    7.40    3.60
   3  30   0    4.60    3.90
  -3  30   0    0.90    3.60
  -3  30   0    6.20    3.40
  -3  30   0    1.30    3.50
  -3  30   0    1.10    4.00
  -4 -30   0    9.30    4.80
   4 -30   0    6.40    4.60
   4 -30   0    7.70    4.50
  -4 -30   0    6.50    3.90
   4 -30   0    9.90    4.70
  -4 -30   0    9.50    4.10
  -4  30   0    9.80    4.60
  -4  30   0    3.30    3.40
   4  30   0    9.80    4.50
   4  30   0   14.30    5.50
   4  30   0   16.10    4.70
   0 -31   0    0.20    2.50
   0  31   0   -1.90    4.10
   0  31   0    1.80    2.90
  -1 -31   0    6.90    4.10
   1 -31   0    8.60    3.50
  -1 -31   0    7.70    3.00
   1 -31   0    5.00    4.30
  -1  31   0    3.40    3.40
  -1  31   0    4.30    4.40
   1  31   0   -0.90    3.10
   1  31   0   -2.60    2.80
   2 -31   0   12.20    4.40
   2 -31   0   14.10    4.00
  -2 -31   0   14.40    4.90
  -2 -31   0    6.70    3.40
  -2  31   0   10.20    4.60
   2  31   0   15.10    4.50
   2  31   0   11.70    4.50
  -2  31   0   13.30    4.40
  -3 -31   0    5.10    3.50
   3 -31   0    3.80    3.80
   3 -31   0    1.60    4.70
   3 -31   0    6.90    3.90
  -3 -31   0    1.70    3.30
   3  31   0    6.90    4.70
  -3  31   0    6.30    6.00
   3  31   0   -0.30    4.60
  -3  31   0    3.70    4.10
  -3  31   0    9.30    4.10
  -3  31   0    3.70    4.40
   4 -31   0    2.30    4.50
  -4 -31   0    2.30    3.70
  -4 -31   0    5.50    4.80
  -4 -31   0    8.70    4.00
   4 -31   0    3.40    4.50
   4 -31   0    6.00    4.40
   4  31   0   12.40    5.50
   4  31   0    2.10    3.10
  -4  31   0    8.10    4.80
   4  31   0    6.70    5.20
  -4  31   0    2.00    4.20
   0 -32   0   -2.40    2.20
   0 -32   0   -2.90    3.60
   0  32   0   -2.10    2.80
   0  32   0   -4.30    3.80
  -1 -32   0   21.10    5.10
  -1 -32   0   21.70    3.50
   1 -32   0   22.60    5.80
  -1  32   0   21.70    4.00
  -1  32   0   25.80    5.80
   1  32   0   16.40    5.60
  -2 -32   0    4.00    4.10
  -2 -32   0   -3.00    2.90
   2 -32   0   -0.90    3.10
   2 -32   0    0.60    3.40
  -2  32   0   -1.50    3.10
  -2  32   0    1.60    3.70
   2  32   0   -0.40    3.70
   2  32   0   -0.60    4.60
  -3 -32   0    2.00    3.40
   3 -32   0    1.00    3.80
   3 -32   0   -1.10    4.60
   3 -32   0   -3.00    3.60
  -3 -32   0   -3.20    4.10
   3  32   0    7.90    5.40
   3  32   0   -1.50    3.00
  -3  32   0   -1.20    4.20
  -3  32   0   -4.40    3.90
  -3  32   0   -6.20    3.40
  -4 -32   0   16.60    5.80
   4 -32   0    8.30    4.70
  -4 -32   0    9.30    4.30
   4 -32   0    7.60    4.60
   4 -32   0    2.90    4.30
  -4  32   0   10.30    5.20
   4  32   0    6.50    4.20
  -4  32   0    6.60    4.60
   4  32   0    8.40    5.30
   0 -33   0   -2.10    2.50
   0 -33   0   -2.00    3.90
   0  33   0   -7.90    3.90
   0  33   0   -7.60    2.80
  -1 -33   0   10.30    3.40
  -1 -33   0   11.40    4.70
   1 -33   0   12.80    4.30
  -1  33   0    5.00    3.70
  -1  33   0    9.20    3.90
   1  33   0    3.60    3.80
   2 -33   0    8.00    3.90
   2 -33   0    9.70    5.00
  -2 -33   0   12.40    5.10
  -2 -33   0   13.70    3.90
   2  33   0   14.40    5.00
  -2  33   0   10.30    5.10
   2  33   0    7.50    5.40
  -2  33   0    6.40    3.40
  -3 -33   0    0.90    4.60
   3 -33   0    0.20    3.80
   3 -33   0    0.30    4.70
  -3 -33   0    1.80    3.60
  -3  33   0   -0.40    3.20
   3  33   0    1.10    5.10
  -3  33   0    2.00    4.40
   3  33   0   -0.30    4.50
   0 -34   0    9.80    5.00
   0  34   0    7.30    5.00
   0  34   0   10.50    3.10
  -1 -34   0    2.30    3.00
   1 -34   0    5.70    4.90
  -1 -34   0    4.10    4.40
  -1  34   0    2.00    3.50
  -1  34   0   -3.60    4.30
   1  34   0   -0.40    4.90
  -2 -34   0    4.80    4.60
  -2 -34   0    2.40    3.30
   2 -34   0   -0.60    4.30
   2  34   0    0.50    3.80
  -2  34   0    2.70    4.20
   2  34   0    7.90    4.60
  -2  34   0    0.20    4.70
   3 -34   0    3.80    5.10
  -3 -34   0    1.80    4.80
  -3 -34   0   -4.90    3.50
   3 -34   0   -1.80    3.40
  -3  34   0   -3.20    4.30
   3  34   0   -0.90    4.80
   3  34   0    0.60    3.50
  -3  34   0    1.60    3.60
   0 -35   0   -0.50    4.10
   0  35   0   -3.20    3.20
   0  35   0   -3.00    4.60
  -1 -35   0   -3.20    2.90
  -1 -35   0    2.20    4.30
   1 -35   0   -0.20    4.40
   1  35   0   -0.90    3.60
  -1  35   0    2.10    2.90
  -1  35   0   -2.80    4.50
  -2 -35   0   -4.70    3.00
  -2 -35   0    0.10    3.30
   2 -35   0    7.60    5.30
  -2  35   0    2.40    4.90
   2  35   0    1.00    4.20
   2  35   0   -4.30    4.80
  -2  35   0    1.30    4.20
   3 -35   0   -0.30    3.60
  -3 -35   0    9.80    5.30
   3 -35   0    7.70    4.40
  -3 -35   0   -0.50    3.80
  -3  35   0    2.10    5.10
   3  35   0    5.70    5.10
   3  35   0    6.60    4.60
  -3  35   0   10.50    5.00
   0 -36   0    2.60    4.60
   0  36   0    4.50    5.30
  -1 -36   0   12.70    5.40
   1 -36   0   17.50    5.70
  -1  36   0    4.60    4.10
   1  36   0   11.40    5.90
  -1  36   0   13.00    5.60
  -2 -36   0    0.00    3.50
  -2 -36   0    9.10    5.10
   2 -36   0    2.40    3.60
  -2  36   0    0.60    3.10
   2  36   0    0.60    5.40
  -2  36   0   -9.20    4.30
   0 -37   0   -0.60    3.30
   0  37   0    2.70    4.00
  -1 -37   0   -7.80    3.90
   1 -37   0    0.90    4.60
  -1  37   0   -5.70    4.50
  -1  37   0   -9.00    3.20
   1  37   0   -1.30    5.10
  -8   0   1    7.90    5.20
   8   0  -1   10.00    5.50
   8   0  -1    7.70    4.50
  -8   0   1    7.30    4.00
  -8   0   1    9.90    3.80
   8   0  -1    1.70    4.00
  -7   0   1    4.60    2.70
  -7   0   1    4.60    3.10
   7   0  -1    5.10    3.40
   7   0  -1    0.60    2.60
   7   0  -1    2.10    3.20
   7   0  -1   13.90    4.80
  -7   0   1    1.30    2.30
   7   0  -1    5.10    2.90
  -7   0   1    5.20    3.20
  -7   0   1   20.70    5.10
  -6   0   1   -3.70    2.00
   6   0  -1   -1.90    2.60
   6   0  -1   -7.10    3.00
   6   0  -1   -3.70    2.10
   6   0  -1   -2.30    2.50
  -6   0   1    0.70    2.70
  -6   0   1   -4.10    3.10
  -6   0   1   -7.20    2.10
   6   0  -1   -0.60    2.20
  -6   0   1   -1.00    2.50
   6   0  -1   -3.00    2.50
  -5   0   1   -0.10    1.80
  -5   0   1    2.60    2.60
   5   0  -1   -3.80    1.90
   5   0  -1    0.70    1.80
  -5   0   1    0.40    2.00
   5   0  -1   -1.40    1.70
   5   0  -1   -1.00    2.20
  -5   0   1   -0.20    2.00
  -5   0   1   -0.60    1.70
   5   0  -1   -0.50    1.90
   5   0  -1   -3.10    1.80
   5   0  -1    0.60    2.80
  -5   0   1   -5.20    1.70
   5   0  -1   -0.40    2.20
   5   0  -1   -1.30    2.00
  -4   0   1    1.80    2.10
  -4   0   1   -1.30    1.20
   4   0  -1    1.70    1.50
   4   0  -1    1.00    2.20
   4   0  -1   -0.40    1.60
  -4   0   1    0.50    1.30
   4   0  -1    2.70    1.70
  -4   0   1    1.60    1.70
  -4   0   1    2.00    1.50
   4   0  -1    3.70    1.70
  -4   0   1    3.20    1.70
   4   0  -1    0.50    1.60
   4   0  -1   -0.30    1.20
   4   0  -1    1.30    1.50
   4   0  -1   -1.10    1.30
   3   0  -1   -1.10    1.10
   3   0  -1    0.00    1.20
   3   0  -1   -1.60    1.10
  -3   0   1    0.20    1.20
  -3   0   1   -1.50    1.00
  -3   0   1   -0.80    1.40
   3   0  -1   -2.40    0.90
  -3   0   1   -0.30    1.00
  -3   0   1   -2.00    1.00
   3   0  -1   -2.20    1.10
   3   0  -1   -2.30    1.00
   3   0  -1   -2.80    1.40
   3   0  -1   -2.00    1.20
   3   0  -1   -2.80    1.10
   2   0  -1    1.20    1.00
   2   0  -1    0.10    0.70
   2   0  -1   -0.40    0.90
   2   0  -1    0.50    0.90
   2   0  -1   -0.20    0.90
   2   0  -1   -1.20    1.10
   2   0  -1   -1.70    1.00
  -2   0   1   -0.70    0.80
   2   0  -1    0.30    0.90
   2   0  -1   -0.20    0.90
  -1   0   1   -0.20    0.40
   1   0  -1   -0.20    0.60
   1   0  -1   -0.30    0.50
  -1   0   1   -0.10    0.40
   1   0  -1   -0.40    0.50
   1   0  -1    0.80    0.50
   1   0  -1   -0.20    0.50
  -1   0   1   -0.80    0.30
  -1   0   1   -1.30    0.40
   1   0  -1   -1.60    0.50
   1   0  -1   -1.70    0.60
  -1   0   1   -0.10    0.40
   1   0  -1    0.20    0.60
   1   0  -1   -0.20    0.70
   1   0  -1   -0.20    0.60
   0   0   1   -0.30    0.20
   0   0  -1   -0.20    0.20
   1   0   1   -3.00    0.90
   1   0   1   -2.80    0.60
  -1   0  -1   -3.20    0.50
   1   0   1   -2.70    0.80
   1   0   1   -3.30    0.80
  -1   0  -1   -3.30    0.50
   1   0   1   -1.40    0.70
   1   0   1   -2.10    0.50
  -2   0  -1    0.80    0.70
   2   0   1   -0.60    1.30
   2   0   1   -0.70    1.20
  -2   0  -1   -0.40    1.10
   2   0   1   -0.30    0.90
   2   0   1    1.40    1.10
  -2   0  -1    0.70    0.70
   2   0   1    0.60    0.90
  -2   0  -1   -0.50    1.10
   2   0   1    0.60    0.70
   2   0   1    0.90    1.20
   2   0   1   -1.40    0.80
   3   0   1    2.90    1.80
   3   0   1    1.30    1.20
  -3   0  -1    1.90    1.50
   3   0   1    2.10    1.40
   3   0   1    4.70    1.40
  -3   0  -1    2.70    1.20
  -3   0  -1   -0.60    1.10
   3   0   1   -2.90    1.50
   3   0   1    1.10    1.20
   3   0   1    0.30    1.10
  -3   0  -1    1.90    1.00
   3   0   1    0.80    1.10
   3   0   1    2.40    1.50
  -4   0  -1    1.40    1.30
   4   0   1   -1.00    1.90
   4   0   1    3.90    2.00
   4   0   1    1.00    1.60
   4   0   1    2.90    2.00
  -4   0  -1    0.30    1.10
   4   0   1    5.10    1.60
   4   0   1    1.80    1.30
   4   0   1   -0.20    2.30
   4   0   1    0.90    1.30
  -4   0  -1    4.20    1.90
   4   0   1    5.80    1.80
  -4   0  -1    7.40    2.80
  -4   0  -1    0.70    1.40
   5   0   1   -2.80    3.00
   5   0   1   -3.60    2.40
   5   0   1   -1.80    1.60
  -5   0  -1    0.30    2.00
   5   0   1   -1.10    1.40
  -5   0  -1   -1.60    1.40
   5   0   1    0.00    1.70
  -5   0  -1   -0.90    2.80
   5   0   1   -1.80    2.10
   6   0   1   -1.20    2.70
   6   0   1   -5.70    2.50
  -6   0  -1   -2.40    2.70
   6   0   1    2.40    3.30
  -6   0  -1   -3.50    2.20
  -6   0  -1   -1.60    2.10
   6   0   1   -1.10    2.80
   6   0   1    2.30    2.60
   7   0   1   -3.90    3.10
   7   0   1   -1.00    4.40
   7   0   1   -1.00    3.30
  -7   0  -1    6.00    3.70
  -7   0  -1    2.10    3.30
   7   0   1    1.70    2.90
   7   0   1   -0.30    3.60
  -7   0  -1   -2.30    2.90
  -7   0  -1    0.70    4.40
  -8   0  -1    4.80    2.90
   8   0   1   14.10    6.20
  -8   0  -1    6.60    4.30
   8   0   1    1.10    4.60
  -8   0  -1    2.60    3.90
   8  -1  -1   13.60    4.70
  -8  -1   1   17.80    4.80
   8  -1  -1   15.80    5.80
   8  -1  -1   16.10    4.60
  -8  -1   1    6.30    5.30
  -8   1   1   17.20    4.30
  -8   1   1   19.60    4.90
  -8   1   1   12.30    5.60
   8   1  -1   12.90    6.00
   8   1  -1   15.20    5.00
  -7  -1   1   63.49    5.60
  -7  -1   1   57.59    5.80
   7  -1  -1   56.89    5.40
  -7  -1   1   73.89    7.80
  -7  -1   1   59.39    5.40
  -7  -1   1   75.29    6.00
   7  -1  -1   63.19    6.90
   7  -1  -1   55.69    7.40
   7  -1  -1   68.09    6.90
   7  -1  -1   69.69    6.30
   7   1  -1   75.79    8.10
  -7   1   1   63.49    6.10
   7   1  -1   65.09    5.80
  -7   1   1   60.29    6.50
  -7   1   1   57.79    5.40
   7   1  -1   60.79    5.80
   7   1  -1   68.09    6.20
   7   1  -1   60.49    6.40
  -7   1   1   65.29    6.00
  -6  -1   1    1.00    3.30
   6  -1  -1   -0.10    2.30
  -6  -1   1    1.50    2.20
  -6  -1   1   -3.70    2.30
   6  -1  -1   -0.30    2.80
  -6  -1   1   -1.20    2.40
   6  -1  -1    2.10    2.50
   6  -1  -1   -0.20    2.70
  -6  -1   1    2.90    2.60
   6  -1  -1   -0.30    3.40
   6  -1  -1   -0.90    2.70
  -6   1   1   -1.30    2.30
   6   1  -1    0.50    2.70
   6   1  -1   -3.80    2.30
   6   1  -1   -2.50    2.80
  -6   1   1   -0.40    2.60
  -6   1   1   -2.10    2.50
   6   1  -1   -3.20    3.30
   6   1  -1   -1.00    2.10
   6   1  -1    5.30    2.50
  -6   1   1    0.00    3.30
   6   1  -1    4.20    2.60
  -6   1   1    2.60    2.90
   5  -1  -1   81.59    5.60
   5  -1  -1   81.09    5.20
   5  -1  -1   79.89    5.00
  -5  -1   1   79.59    5.00
   5  -1  -1   82.19    5.10
  -5  -1   1   75.09    5.20
  -5  -1   1   83.59    5.00
  -5  -1   1   79.99    5.80
  -5  -1   1   79.19    5.00
  -5  -1   1   83.79    4.70
  -5  -1   1   77.39    5.10
   5  -1  -1   78.09    6.40
   5  -1  -1   82.19    4.70
   5  -1  -1   86.69    5.50
   5  -1  -1   75.89    5.40
   5  -1  -1   83.99    4.90
   5   1  -1   78.79    5.20
  -5   1   1   85.49    4.80
   5   1  -1   76.49    4.90
  -5   1   1   82.69    5.30
   5   1  -1   83.49    5.40
   5   1  -1   80.39    5.30
   5   1  -1   75.89    4.80
  -5   1   1   89.39    5.20
   5   1  -1   71.79    5.80
  -5   1   1   72.29    5.30
   5   1  -1   71.29    4.60
   5   1  -1   75.59    5.20
  -5   1   1   84.39    6.40
  -5   1   1   75.69    4.90
   5   1  -1   80.49    5.00
  -4  -1   1   86.69    4.70
   4  -1  -1   90.29    5.00
   4  -1  -1   86.09    5.70
  -4  -1   1   79.59    4.30
   4  -1  -1   88.39    4.50
  -4  -1   1   77.69    4.40
  -4  -1   1   75.89    4.60
   4  -1  -1   85.59    4.80
   4  -1  -1   92.79    4.80
   4  -1  -1   88.79    4.70
   4  -1  -1   83.89    4.70
   4  -1  -1   93.69    5.10
   4  -1  -1   91.79    4.60
  -4  -1   1   77.29    5.10
   4   1  -1   82.19    5.30
  -4   1   1   84.69    4.70
  -4   1   1   84.29    4.70
   4   1  -1   84.59    4.70
   4   1  -1   90.99    4.90
  -4   1   1   85.79    5.60
   4   1  -1   76.19    4.30
  -4   1   1   91.99    4.80
  -4   1   1   86.39    4.50
   4   1  -1   82.79    5.10
   4   1  -1   87.79    4.60
   4   1  -1   85.89    4.80
   4   1  -1   80.99    4.80
  -4   1   1   84.29    4.90
   4   1  -1   86.39    4.80
   3  -1  -1   22.60    2.40
  -3  -1   1   19.30    1.90
  -3  -1   1   23.60    2.30
   3  -1  -1   21.30    2.50
   3  -1  -1   25.80    2.50
   3  -1  -1   24.40    2.30
   3  -1  -1   22.00    2.20
   3  -1  -1   21.90    2.30
   3  -1  -1   21.10    2.10
  -3  -1   1   20.60    2.70
   3  -1  -1   21.40    2.50
  -3  -1   1   19.30    1.90
   3  -1  -1   21.10    2.30
  -3   1   1   24.20    2.30
  -3   1   1   22.50    2.10
   3   1  -1   22.10    2.00
   3   1  -1   22.60    2.10
  -3   1   1   19.00    2.10
   3   1  -1   21.70    2.90
   3   1  -1   21.20    2.30
   3   1  -1   19.50    2.20
  -3   1   1   21.40    2.30
   3   1  -1   18.10    2.30
  -3   1   1   27.20    2.60
   3   1  -1   22.10    2.30
   3   1  -1   20.70    1.90
   3   1  -1   21.00    2.10
   2  -1  -1    2.60    1.30
  -2  -1   1    2.10    1.20
   2  -1  -1    0.70    0.90
   2  -1  -1    1.50    1.00
   2  -1  -1    1.90    1.20
  -2  -1   1    2.20    0.90
   2  -1  -1    2.70    1.10
   2  -1  -1    2.80    1.10
   2  -1  -1    2.40    1.10
  -2  -1   1    3.60    1.10
   2  -1  -1    2.80    0.90
   2  -1  -1    2.20    1.10
   2   1  -1    1.80    1.30
   2   1  -1    1.80    0.90
   2   1  -1    2.10    1.10
   2   1  -1    4.30    1.20
  -2   1   1    2.20    1.00
   2   1  -1    3.00    1.20
   2   1  -1    3.40    1.10
  -2   1   1    1.40    1.00
   2   1  -1    2.00    1.00
   2   1  -1    1.90    1.30
  -2   1   1    3.10    1.10
   2   1  -1    2.90    0.90
   1  -1  -1 2680.73   97.99
   1  -1  -1 2626.74   98.09
   1  -1  -1 3364.26   97.89
   1  -1  -1 3382.16   98.09
   1  -1  -1 2980.90   97.99
   1  -1  -1 3120.99   97.99
   1   1  -1 2883.31   97.89
   1   1  -1 3029.40   97.99
   1   1  -1 3369.26   98.19
   0  -1  -1   -0.50    0.20
   0  -1   1   -0.20    0.10
   1  -1   1  722.23   21.20
   1  -1   1  699.83   20.90
   1  -1   1  723.63   21.00
  -1  -1  -1  619.34   21.40
   1   1   1  579.14   21.00
   1   1   1  574.34   21.00
  -1   1  -1  540.95   21.00
  -2  -1  -1 1225.08   42.30
   2  -1   1 1362.66   43.20
   2  -1   1 1296.47   42.90
   2  -1   1 1292.17   42.60
   2  -1   1 1324.17   42.40
   2  -1   1 1314.77   43.20
   2  -1   1 1362.66   43.00
  -2  -1  -1 1327.67   43.00
   2  -1   1 1285.77   43.80
  -2  -1  -1 1320.17   42.70
   2  -1   1 1318.57   43.20
  -2  -1  -1 1267.07   43.60
   2   1   1 1321.97   43.10
   2   1   1 1299.77   43.00
  -2   1  -1 1332.37   43.10
   2   1   1 1366.86   43.10
   2   1   1 1283.27   42.80
  -2   1  -1 1285.57   42.50
   2   1   1 1297.47   43.20
  -2   1  -1 1263.87   42.40
  -2   1  -1 1333.97   42.90
   2   1   1 1266.87   43.70
   2   1   1 1313.27   42.60
   2   1   1 1335.77   42.40
   3  -1   1   57.29    3.60
   3  -1   1   68.09    4.70
  -3  -1  -1   78.79    3.20
  -3  -1  -1   69.49    4.70
   3  -1   1   70.39    3.40
   3  -1   1   63.19    4.10
   3  -1   1   70.79    4.10
  -3  -1  -1   66.19    3.50
  -3  -1  -1   62.29    3.60
   3  -1   1   67.39    3.80
   3  -1   1   61.59    3.30
   3  -1   1   61.39    3.30
   3  -1   1   61.49    4.10
   3   1   1   63.79    4.20
   3   1   1   62.19    3.70
   3   1   1   75.59    3.60
  -3   1  -1   63.89    3.60
  -3   1  -1   55.09    3.20
   3   1   1   71.09    4.80
   3   1   1   73.39    3.70
  -3   1  -1   66.99    4.00
  -3   1  -1   66.89    3.30
   3   1   1   63.79    3.60
   3   1   1   72.09    3.20
  -4  -1  -1  138.69    6.20
   4  -1   1  147.19    6.90
   4  -1   1  133.39    6.00
   4  -1   1  130.39    7.80
  -4  -1  -1  147.69    7.90
   4  -1   1  133.69    5.90
   4  -1   1  138.49    6.50
   4  -1   1  150.48    6.60
   4  -1   1  130.49    6.80
   4  -1   1  127.29    6.70
  -4  -1  -1  138.89    5.60
  -4  -1  -1  136.59    6.40
   4   1   1  140.49    6.60
   4   1   1  134.89    7.00
  -4   1  -1  132.69    5.80
  -4   1  -1  135.19    5.80
   4   1   1  135.99    7.90
   4   1   1  127.49    6.30
  -4   1  -1  127.89    7.60
   4   1   1  128.49    5.90
  -4   1  -1  129.39    6.60
   4   1   1  131.59    6.20
  -4   1  -1  143.99    6.40
   4   1   1  133.09    5.60
   4   1   1  132.09    6.80
   5  -1   1   17.80    3.70
  -5  -1  -1   18.00    2.70
  -5  -1  -1   18.10    4.10
   5  -1   1   15.20    3.70
   5  -1   1   20.80    3.20
  -5  -1  -1   22.60    3.30
   5  -1   1   16.40    3.40
   5  -1   1   19.40    3.60
   5   1   1   13.90    3.10
   5   1   1   21.60    3.10
   5   1   1   21.70    3.30
   5   1   1   20.40    3.50
  -5   1  -1   18.00    3.30
  -5   1  -1   19.70    3.90
   5   1   1   14.40    4.30
   5   1   1   16.50    3.30
  -5   1  -1   21.10    3.00
   6  -1   1    4.20    3.30
  -6  -1  -1    7.50    3.90
   6  -1   1    1.40    2.30
   6  -1   1   14.20    4.60
   6  -1   1   -0.40    3.00
  -6  -1  -1    4.30    2.90
  -6  -1  -1    6.10    2.80
   6  -1   1    1.50    2.40
   6   1   1    9.20    4.40
   6   1   1    5.90    3.10
   6   1   1    1.80    2.90
   6   1   1    4.60    3.40
  -6   1  -1   -1.40    2.80
  -6   1  -1    2.10    2.40
  -6   1  -1    3.20    2.40
   6   1   1    9.00    3.00
  -7  -1  -1    0.50    3.00
   7  -1   1    2.70    4.40
   7  -1   1    4.70    5.00
  -7  -1  -1    2.00    3.20
   7  -1   1    1.10    3.60
   7  -1   1    7.10    3.80
  -7  -1  -1    0.20    4.20
  -7  -1  -1   -0.10    3.10
   7  -1   1    6.20    3.20
   7   1   1   -1.10    3.60
  -7   1  -1    1.50    3.30
   7   1   1   -4.90    3.00
  -7   1  -1   -2.10    3.50
   7   1   1    1.40    4.50
   7   1   1   -4.20    2.90
   7   1   1    1.60    3.00
  -7   1  -1   -1.00    4.00
  -8  -1  -1   33.10    7.60
  -8  -1  -1   33.70    5.00
  -8  -1  -1   34.90    5.70
   8  -1   1   42.60    6.90
   8  -1   1   43.90    6.60
  -8   1  -1   37.30    6.00
  -8   1  -1   36.10    6.90
   8   1   1   33.50    6.00
  -8   1  -1   41.80    6.40
   8  -2  -1    1.60    3.80
  -8  -2   1    3.60    5.10
  -8  -2   1    0.90    2.90
   8  -2  -1   -2.50    2.50
  -8  -2   1   18.70    5.70
   8  -2  -1   15.00    5.70
  -8   2   1    8.40    5.10
  -8   2   1    4.90    3.80
   8   2  -1    1.90    3.30
   8   2  -1   15.80    5.90
  -8   2   1    6.80    3.80
  -7  -2   1   26.80    4.30
   7  -2  -1   25.80    4.70
   7  -2  -1   24.40    5.70
  -7  -2   1   26.10    5.20
  -7  -2   1   27.40    4.30
  -7  -2   1   23.50    4.60
   7  -2  -1   25.00    4.60
   7  -2  -1   26.50    4.90
  -7   2   1   28.80    4.70
   7   2  -1   20.80    4.20
  -7   2   1   26.10    4.60
  -7   2   1   24.50    4.60
  -7   2   1   29.50    5.90
   7   2  -1   26.70    4.40
   7   2  -1   22.30    4.40
  -6  -2   1   75.19    5.70
   6  -2  -1   77.19    6.20
  -6  -2   1   76.69    7.20
  -6  -2   1   79.49    5.80
   6  -2  -1   83.19    5.90
   6  -2  -1   85.49    6.40
   6  -2  -1   75.49    7.40
   6  -2  -1   80.19    5.50
  -6  -2   1   87.29    5.80
   6  -2  -1   91.69    6.30
   6   2  -1   81.89    6.00
   6   2  -1   69.99    5.20
  -6   2   1   76.89    5.60
   6   2  -1   73.69    5.90
   6   2  -1   85.59    6.00
   6   2  -1   79.39    5.60
  -6   2   1   81.99    6.10
  -6   2   1   88.29    6.30
   6   2  -1   73.49    7.30
  -6   2   1   77.39    7.20
   5  -2  -1   14.10    2.40
   5  -2  -1   10.60    2.70
   5  -2  -1   12.20    3.70
  -5  -2   1   14.60    2.20
  -5  -2   1   13.20    3.00
   5  -2  -1    7.30    2.70
  -5  -2   1   10.40    2.90
  -5  -2   1   11.80    2.20
   5  -2  -1   11.50    2.50
   5  -2  -1    9.40    2.40
  -5  -2   1    7.00    2.60
   5  -2  -1   11.20    2.50
  -5  -2   1    8.70    2.50
   5  -2  -1   12.70    3.00
   5  -2  -1   13.60    2.90
  -5   2   1    9.70    3.40
   5   2  -1   14.40    2.80
   5   2  -1   12.30    2.70
   5   2  -1   10.00    2.90
   5   2  -1    9.90    3.50
   5   2  -1    8.70    2.60
   5   2  -1    7.10    3.00
  -5   2   1   11.80    2.30
   5   2  -1   12.20    2.80
   5   2  -1   15.10    2.40
  -5   2   1    9.60    2.40
  -5   2   1   14.80    2.80
  -5   2   1   10.80    2.90
   5   2  -1   11.10    2.40
  -5   2   1   10.20    2.50
  -5   2   1   11.10    2.80
   4  -2  -1  420.16   16.60
  -4  -2   1  410.96   15.70
  -4  -2   1  424.16   15.40
   4  -2  -1  435.06   15.80
   4  -2  -1  431.46   15.80
  -4  -2   1  401.76   16.40
   4  -2  -1  423.46   15.60
   4  -2  -1  426.56   15.50
   4  -2  -1  423.96   15.80
   4  -2  -1  419.26   15.30
   4  -2  -1  429.56   15.20
  -4  -2   1  428.56   15.10
   4  -2  -1  429.86   15.30
  -4  -2   1  411.56   15.10
   4   2  -1  409.66   15.60
   4   2  -1  422.06   15.90
   4   2  -1  398.16   16.50
  -4   2   1  428.36   15.60
   4   2  -1  394.06   15.30
  -4   2   1  425.06   15.70
   4   2  -1  426.76   15.10
  -4   2   1  423.56   15.50
   4   2  -1  389.86   15.40
  -4   2   1  439.56   15.30
  -4   2   1  420.36   15.70
   4   2  -1  426.16   15.20
   4   2  -1  408.56   15.30
   4   2  -1  415.96   15.50
  -3  -2   1    0.40    1.10
  -3  -2   1    0.30    1.10
   3  -2  -1    0.40    1.30
   3  -2  -1   -0.90    1.30
   3  -2  -1    1.40    1.40
  -3  -2   1    1.00    1.30
   3  -2  -1    2.60    1.20
   3  -2  -1    0.70    1.30
   3  -2  -1    1.10    1.10
  -3  -2   1    1.00    1.50
   3  -2  -1    1.20    1.00
   3  -2  -1    0.20    1.30
   3  -2  -1   -1.30    0.90
   3   2  -1    1.40    1.20
   3   2  -1   -0.60    1.30
   3   2  -1    1.30    1.50
  -3   2   1   -2.10    1.20
  -3   2   1   -0.50    1.40
   3   2  -1    1.50    1.10
  -3   2   1   -2.00    1.10
   3   2  -1   -0.10    1.20
  -3   2   1    1.30    1.30
   3   2  -1   -1.70    1.30
   3   2  -1   -3.20    1.50
   3   2  -1    0.60    1.10
  -3   2   1    0.70    1.20
   3   2  -1   -1.20    1.20
  -2  -2   1  971.90   37.70
   2  -2  -1 1218.68   38.20
   2  -2  -1 1221.78   38.20
   2  -2  -1 1215.28   37.90
   2  -2  -1 1145.89   38.50
   2  -2  -1 1233.88   37.90
   2  -2  -1 1184.18   38.10
  -2  -2   1 1078.19   38.30
   2  -2  -1 1181.58   38.20
   2  -2  -1 1180.78   38.20
   2  -2  -1 1173.28   38.00
  -2  -2   1 1153.08   38.10
   2   2  -1 1173.98   37.90
   2   2  -1 1173.08   38.20
  -2   2   1 1054.99   38.10
   2   2  -1 1188.88   38.20
  -2   2   1 1192.78   38.10
   2   2  -1 1182.18   38.40
   2   2  -1 1179.78   37.90
  -2   2   1 1173.28   38.20
   2   2  -1 1174.68   37.90
  -2   2   1  979.00   37.70
   2   2  -1 1163.98   38.50
   2   2  -1 1198.68   37.90
   2   2  -1 1162.48   38.10
   1  -2  -1 2033.70   71.99
   1  -2  -1 2426.16   71.99
   1  -2  -1 2382.06   72.09
   1  -2  -1 2018.30   71.99
   1   2  -1 2209.68   72.19
   1   2  -1 2317.47   71.89
   0  -2  -1   -4.10    0.30
   0  -2   1   -3.80    0.20
   0  -2   1   -3.70    0.20
   0  -2  -1   -3.70    0.30
   0   2   1   -3.70    0.20
   0   2  -1   -3.60    0.30
  -1  -2  -1   65.49    3.20
   1  -2   1   60.79    2.80
   1  -2   1   69.09    3.00
   1  -2   1   73.99    2.70
   1  -2   1   57.19    2.80
  -1   2  -1   64.19    2.90
   1   2   1   52.89    2.70
   1   2   1   72.29    2.70
   2  -2   1   40.30    2.70
   2  -2   1   38.90    2.40
   2  -2   1   37.80    2.80
   2  -2   1   38.20    3.20
  -2  -2  -1   39.10    3.10
   2  -2   1   39.00    2.70
  -2  -2  -1   37.40    2.30
   2  -2   1   48.10    2.10
  -2  -2  -1   41.00    2.20
   2  -2   1   35.80    1.90
   2  -2   1   46.90    2.50
  -2  -2  -1   35.60    1.80
   2   2   1   41.50    2.40
   2   2   1   41.20    2.60
  -2   2  -1   36.50    2.40
   2   2   1   38.90    3.10
   2   2   1   40.20    2.60
  -2   2  -1   44.50    2.40
  -2   2  -1   34.90    1.90
   2   2   1   40.50    1.80
   2   2   1   39.30    2.40
   2   2   1   40.80    2.60
   2   2   1   37.40    2.10
   3  -2   1 1597.94   54.69
   3  -2   1 1584.44   54.19
  -3  -2  -1 1677.33   55.49
   3  -2   1 1598.14   55.49
   3  -2   1 1695.93   54.49
  -3  -2  -1 1708.83   53.59
  -3  -2  -1 1706.63   54.49
   3  -2   1 1677.13   53.79
  -3  -2  -1 1679.03   53.99
   3  -2   1 1603.44   54.69
   3  -2   1 1657.13   53.89
   3  -2   1 1652.33   54.69
  -3   2  -1 1695.73   53.79
   3   2   1 1610.64   54.59
  -3   2  -1 1656.03   53.89
   3   2   1 1639.04   54.19
   3   2   1 1672.83   53.59
   3   2   1 1580.74   54.39
  -3   2  -1 1706.93   54.39
   3   2   1 1708.33   54.49
   3   2   1 1606.44   54.79
   3   2   1 1585.54   55.49
   3   2   1 1639.24   53.99
  -3   2  -1 1628.24   54.59
   4  -2   1   25.40    2.90
   4  -2   1   31.00    4.30
  -4  -2  -1   26.60    3.10
   4  -2   1   29.60    2.40
  -4  -2  -1   22.50    2.50
   4  -2   1   29.70    3.30
   4  -2   1   31.70    3.00
   4  -2   1   23.30    3.20
  -4  -2  -1   24.50    3.90
  -4  -2  -1   21.80    2.10
   4  -2   1   34.90    3.20
   4   2   1   21.80    2.10
   4   2   1   21.50    2.90
  -4   2  -1   32.10    4.20
   4   2   1   22.30    3.10
  -4   2  -1   31.10    2.50
  -4   2  -1   26.10    2.40
   4   2   1   23.80    2.60
   4   2   1   22.50    2.70
  -4   2  -1   31.00    3.00
  -4   2  -1   30.10    2.90
   4   2   1   22.90    3.90
   4   2   1   24.10    3.20
   4   2   1   26.10    3.10
   5  -2   1   -0.10    2.50
   5  -2   1    0.30    2.00
  -5  -2  -1   -0.40    1.40
   5  -2   1   -1.00    2.40
   5  -2   1   -2.30    3.00
  -5  -2  -1   -0.50    1.80
  -5  -2  -1    0.60    2.10
   5  -2   1   -1.40    2.00
   5  -2   1   -0.90    2.10
   5   2   1   -4.50    2.50
   5   2   1    2.50    2.30
   5   2   1    7.70    2.50
   5   2   1    1.80    2.60
  -5   2  -1    0.80    1.90
  -5   2  -1   -1.30    2.20
  -5   2  -1   -1.30    2.90
   5   2   1    0.50    1.90
   5   2   1    2.60    1.80
   6  -2   1  174.88    9.10
  -6  -2  -1  147.59   10.20
  -6  -2  -1  185.28    9.10
   6  -2   1  157.98    9.30
   6  -2   1  167.48   10.90
   6  -2   1  174.18    9.80
   6  -2   1  181.38    8.90
  -6   2  -1  171.08    8.90
   6   2   1  167.48    9.80
  -6   2  -1  167.38    9.40
  -6   2  -1  177.08    8.70
  -6   2  -1  169.98   10.70
   6   2   1  159.88    8.60
   6   2   1  154.78    8.70
   6   2   1  178.98    9.30
   6   2   1  171.78   11.00
  -7  -2  -1   13.30    4.60
   7  -2   1   24.20    4.80
   7  -2   1   19.50    4.50
  -7  -2  -1   21.40    4.50
   7  -2   1   23.20    5.20
  -7  -2  -1   20.10    4.30
   7  -2   1   21.10    6.00
  -7  -2  -1   18.60    4.30
   7   2   1   20.10    4.50
   7   2   1   17.10    4.50
   7   2   1   16.70    5.10
  -7   2  -1   16.00    4.20
   7   2   1   18.80    4.30
  -7   2  -1   22.30    5.90
   7   2   1   21.60    5.30
  -8  -2  -1   21.40    6.40
  -8  -2  -1   13.10    4.50
  -8  -2  -1   20.70    5.50
  -8   2  -1   30.10    5.60
  -8   2  -1   21.40    5.60
  -8   2  -1   25.10    5.20
   8   2   1   18.00    4.90
  -8  -3   1   27.00    6.50
   8  -3  -1   24.70    5.10
  -8  -3   1   25.50    5.40
   8  -3  -1   28.00    6.90
   8  -3  -1   19.40    5.40
  -8  -3   1   23.50    4.90
   8   3  -1   21.00    4.90
   8   3  -1   14.90    5.10
  -8   3   1   17.20    5.90
   8   3  -1   26.00    6.70
  -8   3   1   33.10    5.30
  -8   3   1   30.80    5.30
   7  -3  -1   20.00    5.70
  -7  -3   1   28.60    4.50
   7  -3  -1   37.50    5.40
  -7  -3   1   29.30    5.00
  -7  -3   1   26.60    4.30
  -7  -3   1   29.10    5.90
   7  -3  -1   22.30    4.70
   7  -3  -1   28.80    4.60
   7  -3  -1   24.60    4.80
  -7   3   1   28.30    4.90
   7   3  -1   32.20    4.80
  -7   3   1   25.20    4.60
  -7   3   1   24.90    5.60
   7   3  -1   12.60    5.10
   7   3  -1   28.90    4.50
   7   3  -1   29.20    5.30
  -7   3   1   28.10    4.50
  -7   3   1   31.30    5.10
   6  -3  -1    1.90    2.20
   6  -3  -1   -3.10    3.20
  -6  -3   1   -0.20    2.20
   6  -3  -1    3.40    2.80
   6  -3  -1   -1.80    2.80
   6  -3  -1   -3.30    2.50
  -6  -3   1   -4.70    3.10
   6  -3  -1   -2.60    2.50
  -6  -3   1   -3.30    2.30
  -6  -3   1    0.90    2.30
  -6   3   1   -0.70    2.10
  -6   3   1   -2.00    2.30
   6   3  -1   -4.20    3.40
  -6   3   1    1.60    3.50
   6   3  -1    1.60    2.30
   6   3  -1    0.70    2.30
   6   3  -1    1.50    2.70
   6   3  -1    1.20    2.60
  -6   3   1   -2.60    2.60
   6   3  -1   -0.70    2.40
   5  -3  -1    1.40    2.80
  -5  -3   1    5.80    2.20
   5  -3  -1    6.50    2.30
   5  -3  -1    0.80    1.80
   5  -3  -1    1.80    2.40
   5  -3  -1    5.30    2.60
   5  -3  -1   -0.70    1.70
   5  -3  -1   -1.00    2.10
  -5  -3   1    1.40    1.90
  -5  -3   1    4.20    2.90
   5  -3  -1    3.80    2.10
  -5  -3   1    4.60    2.50
   5  -3  -1    6.80    2.10
  -5  -3   1   -1.10    2.10
  -5  -3   1    3.10    1.80
   5   3  -1   -0.10    2.80
   5   3  -1    1.80    2.20
  -5   3   1    3.50    2.00
  -5   3   1    5.40    1.90
   5   3  -1   -1.30    2.00
   5   3  -1   -0.40    1.70
   5   3  -1   -1.70    2.00
  -5   3   1    3.40    1.90
   5   3  -1    4.80    2.30
  -5   3   1    2.50    2.00
  -5   3   1    6.60    2.30
  -5   3   1    1.60    2.50
   5   3  -1    4.00    2.30
  -5   3   1    1.70    2.70
   5   3  -1    1.00    2.50
  -4  -3   1   64.49    4.80
   4  -3  -1   54.39    4.40
   4  -3  -1   65.59    4.40
   4  -3  -1   58.09    3.80
   4  -3  -1   64.69    4.10
   4  -3  -1   60.69    3.80
  -4  -3   1   61.19    3.80
  -4  -3   1   56.09    3.90
  -4  -3   1   59.89    3.60
   4  -3  -1   63.29    3.70
   4  -3  -1   62.79    4.00
   4  -3  -1   54.69    4.00
   4  -3  -1   57.49    4.20
  -4  -3   1   57.49    3.40
   4   3  -1   58.49    4.80
   4   3  -1   58.79    3.80
  -4   3   1   59.29    3.40
   4   3  -1   62.39    3.60
  -4   3   1   67.19    3.90
  -4   3   1   62.09    3.80
   4   3  -1   53.89    3.90
   4   3  -1   58.89    3.90
  -4   3   1   63.19    4.30
  -4   3   1   59.39    3.90
   4   3  -1   55.39    4.00
   4   3  -1   63.69    4.20
   4   3  -1   54.79    3.60
   4   3  -1   62.89    4.10
  -4   3   1   56.79    4.10
   3  -3  -1   27.40    2.60
  -3  -3   1   30.80    2.30
  -3  -3   1   32.80    2.80
   3  -3  -1   29.80    2.80
   3  -3  -1   34.00    2.80
   3  -3  -1   33.90    2.60
   3  -3  -1   34.40    2.70
  -3  -3   1   34.30    2.30
   3  -3  -1   32.50    2.70
  -3  -3   1   32.80    3.00
   3  -3  -1   32.20    2.30
   3  -3  -1   34.20    2.30
   3  -3  -1   30.70    2.50
   3   3  -1   31.30    2.30
  -3   3   1   30.50    2.50
   3   3  -1   29.70    2.80
  -3   3   1   27.20    2.60
  -3   3   1   33.70    2.20
   3   3  -1   32.00    2.70
   3   3  -1   28.80    2.30
  -3   3   1   34.80    2.50
  -3   3   1   31.80    2.60
   3   3  -1   32.10    2.50
   3   3  -1   29.40    2.40
   3   3  -1   32.10    2.40
   3   3  -1   28.20    2.80
   3   3  -1   29.80    3.10
   2  -3  -1   85.39    4.30
   2  -3  -1   91.79    4.00
   2  -3  -1   92.09    3.60
   2  -3  -1   89.89    3.60
  -2  -3   1   73.89    3.50
  -2  -3   1   87.29    3.90
   2  -3  -1   88.09    4.00
   2  -3  -1   87.99    4.00
   2  -3  -1   89.29    3.80
  -2  -3   1   81.49    4.10
   2  -3  -1   90.59    4.10
   2  -3  -1   87.69    4.00
   2   3  -1   87.79    3.90
   2   3  -1   89.69    3.90
   2   3  -1   83.59    4.00
  -2   3   1   92.39    4.00
   2   3  -1   82.59    4.00
   2   3  -1   87.39    3.50
   2   3  -1   88.09    3.70
   2   3  -1   89.19    3.70
   2   3  -1   83.59    4.20
  -2   3   1   81.89    3.90
  -2   3   1   71.59    3.40
  -2   3   1   86.19    4.00
   2   3  -1   86.29    3.60
   1  -3  -1 1413.86   51.09
   1  -3  -1 1591.64   51.29
  -1   3   1 1781.12   51.29
   1   3  -1 1820.52   50.79
   1   3  -1 1441.06   51.09
   1   3  -1 1425.36   51.29
   0  -3   1 1499.25   42.80
   0  -3  -1 1204.98   42.90
   0   3   1 1240.28   42.90
   1  -3   1  816.82   26.80
   1  -3   1  777.52   26.60
   1  -3   1  692.43   26.60
   1  -3   1  840.32   26.40
  -1  -3  -1  804.42   27.00
   1   3   1  836.32   26.60
   1   3   1  848.62   26.60
   1   3   1  840.92   26.50
  -1   3  -1  809.42   26.70
  -1   3  -1  834.82   26.70
   2  -3   1    2.00    1.10
  -2  -3  -1   -2.20    1.40
  -2  -3  -1    2.10    1.10
   2  -3   1    2.30    1.40
   2  -3   1    1.50    0.90
  -2  -3  -1    1.80    0.70
   2  -3   1    3.10    1.00
   2  -3   1    0.60    0.80
   2  -3   1    1.80    1.70
   2  -3   1    2.00    1.40
  -2  -3  -1    1.40    0.80
   2  -3   1    0.00    0.70
  -2   3  -1    1.10    0.80
  -2   3  -1    3.20    1.40
   2   3   1    1.70    1.00
   2   3   1    1.70    0.90
   2   3   1    3.00    1.20
   2   3   1    1.30    1.60
   2   3   1    0.40    1.00
   2   3   1    3.40    1.20
  -2   3  -1    0.80    0.80
  -2   3  -1    3.10    1.00
   2   3   1    3.10    1.20
   2   3   1    1.60    0.60
  -3  -3  -1    9.60    1.40
   3  -3   1    7.60    1.70
  -3  -3  -1    7.90    1.20
   3  -3   1   11.70    1.60
  -3  -3  -1   13.40    2.30
  -3  -3  -1   14.80    2.00
   3   3   1   13.20    2.30
   3   3   1   11.80    2.00
   3   3   1   10.00    1.30
   3   3   1    9.60    1.60
  -3   3  -1   13.50    1.60
   3   3   1   13.20    2.10
  -3   3  -1   12.70    2.00
   3   3   1   10.10    1.80
   3   3   1   14.10    2.10
   3   3   1   10.80    1.90
   4  -3   1   23.80    4.00
   4  -3   1   26.30    3.20
   4  -3   1   24.90    2.90
  -4  -3  -1   32.00    4.30
  -4  -3  -1   25.80    2.40
   4  -3   1   31.20    2.80
  -4  -3  -1   29.40    3.20
   4  -3   1   30.10    2.50
   4  -3   1   32.90    3.60
   4  -3   1   30.30    3.60
  -4  -3  -1   30.30    2.60
   4   3   1   28.70    4.20
  -4   3  -1   27.60    2.50
  -4   3  -1   36.80    3.60
   4   3   1   29.40    3.70
   4   3   1   26.90    2.60
   4   3   1   28.70    3.20
   4   3   1   27.60    3.00
  -4   3  -1   28.90    2.70
  -4   3  -1   30.30    2.50
   4   3   1   24.00    3.10
   4   3   1   27.80    3.10
   5  -3   1    4.90    2.20
   5  -3   1    3.70    2.90
   5  -3   1    3.00    2.80
   5  -3   1   -0.50    2.60
   5  -3   1    5.40    3.50
  -5  -3  -1    2.30    3.00
   5  -3   1    5.40    2.50
  -5  -3  -1    9.10    2.50
  -5  -3  -1    5.00    2.00
  -5   3  -1    5.30    2.60
   5   3   1   -1.70    2.80
   5   3   1    6.20    2.30
   5   3   1    9.30    2.80
   5   3   1    0.50    2.20
   5   3   1    4.40    3.40
   5   3   1    3.00    2.50
  -5   3  -1    6.70    2.50
  -5   3  -1   10.20    2.40
  -5   3  -1    5.40    2.80
   6  -3   1    0.20    3.00
   6  -3   1    7.60    3.50
  -6  -3  -1    0.50    3.60
   6  -3   1    5.70    3.50
   6  -3   1    8.10    2.60
  -6  -3  -1    2.30    2.00
  -6  -3  -1    0.00    2.30
  -6   3  -1    2.60    3.20
   6   3   1    0.20    2.40
  -6   3  -1    5.30    2.90
   6   3   1    3.00    2.30
   6   3   1    4.90    2.90
  -6   3  -1    3.20    3.10
   6   3   1    4.30    2.90
   6   3   1    3.10    4.00
  -6   3  -1    7.10    2.80
   7  -3   1   21.00    4.80
  -7  -3  -1   10.00    5.10
  -7  -3  -1   26.20    4.40
  -7  -3  -1   18.10    4.30
   7  -3   1   22.40    5.50
   7  -3   1   20.80    4.90
  -7  -3  -1   21.70    4.40
  -7   3  -1   25.00    5.40
   7   3   1   23.20    4.80
   7   3   1   19.90    4.50
  -7   3  -1   20.70    4.60
  -7   3  -1   19.30    4.00
   7   3   1   20.70    6.20
   7   3   1   16.70    4.30
  -8  -3  -1   12.50    5.00
  -8  -3  -1   15.50    4.20
  -8  -3  -1   24.80    6.70
  -8   3  -1   21.10    5.40
  -8   3  -1   28.30    5.60
  -8   3  -1   33.80    5.60
  -8  -4   1   -0.30    4.60
   8  -4  -1    2.30    4.90
   8  -4  -1    1.60    3.70
  -8  -4   1   -2.10    3.70
  -8  -4   1   -1.70    3.10
   8  -4  -1    4.00    4.30
  -8   4   1   -2.90    3.20
   8   4  -1    5.50    5.20
   8   4  -1   -1.60    4.10
  -8   4   1    0.60    4.10
  -8   4   1    2.70    3.40
   8   4  -1    3.10    3.70
   7  -4  -1   -0.30    3.10
   7  -4  -1   13.00    4.20
   7  -4  -1   11.50    4.10
  -7  -4   1    9.90    4.70
  -7  -4   1   10.20    3.90
  -7  -4   1    9.60    3.30
   7  -4  -1    9.10    3.80
   7  -4  -1    8.70    4.50
  -7  -4   1   13.80    3.60
   7   4  -1    3.50    3.90
  -7   4   1    8.90    3.80
   7   4  -1    5.10    3.60
   7   4  -1   16.10    4.10
  -7   4   1    8.80    3.50
  -7   4   1   11.00    3.70
  -7   4   1    4.60    3.20
   7   4  -1    8.50    4.70
  -7   4   1   16.30    5.10
   6  -4  -1    1.00    3.80
   6  -4  -1    3.50    2.20
  -6  -4   1   -1.00    2.40
   6  -4  -1   -0.60    2.70
  -6  -4   1   -1.40    2.90
  -6  -4   1    1.10    2.40
   6  -4  -1   -1.70    2.80
   6  -4  -1   -1.80    2.40
   6  -4  -1   -2.30    2.80
  -6  -4   1   -1.40    3.40
   6   4  -1    3.00    3.90
   6   4  -1    1.60    2.70
  -6   4   1   -1.70    2.70
   6   4  -1   -4.50    2.70
   6   4  -1    1.30    1.90
  -6   4   1    0.60    2.90
  -6   4   1    0.10    2.60
  -6   4   1    2.90    3.20
   6   4  -1   -0.10    2.60
   6   4  -1    3.10    2.70
  -6   4   1   -1.40    3.40
   5  -4  -1    9.70    2.40
   5  -4  -1   14.10    2.90
  -5  -4   1   11.10    2.50
   5  -4  -1   10.40    2.60
   5  -4  -1   10.40    3.00
   5  -4  -1    8.80    2.60
   5  -4  -1   15.40    2.70
  -5  -4   1    9.20    2.10
  -5  -4   1   11.60    3.40
   5  -4  -1   11.20    3.10
  -5  -4   1   11.40    2.50
   5  -4  -1   10.10    3.00
   5  -4  -1    8.10    2.80
   5   4  -1    7.00    2.40
   5   4  -1   10.10    2.80
   5   4  -1    6.20    2.50
  -5   4   1   12.00    2.60
  -5   4   1    8.30    2.60
   5   4  -1   11.20    2.40
   5   4  -1   10.90    2.30
  -5   4   1   10.00    2.70
   5   4  -1   11.00    3.60
   5   4  -1    8.20    2.60
  -5   4   1   10.50    2.50
  -5   4   1   10.80    2.30
   5   4  -1    6.70    2.50
  -5   4   1   13.40    3.20
   4  -4  -1   -0.90    1.30
  -4  -4   1   -0.40    1.20
  -4  -4   1   -0.40    1.30
  -4  -4   1   -2.30    1.90
   4  -4  -1    1.80    1.30
   4  -4  -1    0.60    1.60
   4  -4  -1   -0.30    1.50
   4  -4  -1    0.40    1.20
   4  -4  -1   -0.20    1.80
   4  -4  -1   -1.10    1.00
   4  -4  -1   -1.00    1.40
  -4  -4   1   -2.90    1.70
   4  -4  -1   -0.90    2.10
  -4  -4   1    1.60    1.10
  -4   4   1   -1.60    1.60
  -4   4   1   -0.90    1.10
   4   4  -1   -2.50    1.70
   4   4  -1    1.50    1.20
   4   4  -1    0.60    1.70
   4   4  -1    0.80    2.10
   4   4  -1   -1.80    1.40
  -4   4   1   -1.20    1.40
   4   4  -1    1.40    2.00
   4   4  -1    0.70    1.60
   4   4  -1   -1.20    1.50
   4   4  -1    1.90    1.50
  -4   4   1   -0.10    1.50
  -4   4   1    1.10    1.60
  -4   4   1   -0.90    1.30
   3  -4  -1  751.62   25.90
   3  -4  -1  722.63   26.50
  -3  -4   1  747.33   25.80
   3  -4  -1  754.52   25.90
   3  -4  -1  747.03   25.60
   3  -4  -1  755.12   25.30
  -3  -4   1  734.73   25.10
  -3  -4   1  733.63   26.20
   3  -4  -1  778.92   25.80
  -3  -4   1  763.42   25.40
   3  -4  -1  791.92   25.30
   3  -4  -1  777.92   26.00
   3  -4  -1  729.83   25.60
   3   4  -1  774.62   25.40
   3   4  -1  726.73   25.70
   3   4  -1  740.73   25.20
   3   4  -1  747.73   26.00
   3   4  -1  765.22   25.20
   3   4  -1  748.73   25.50
  -3   4   1  765.82   25.70
  -3   4   1  771.72   25.20
   3   4  -1  739.73   26.30
  -3   4   1  752.02   25.90
   3   4  -1  753.52   25.90
   3   4  -1  739.63   25.90
  -3   4   1  734.53   25.80
  -3   4   1  769.42   25.70
   2  -4  -1  279.47   10.20
  -2  -4   1  256.27    9.50
   2  -4  -1  275.57   10.50
   2  -4  -1  287.17   10.20
   2  -4  -1  275.37    9.80
   2  -4  -1  282.27   10.00
   2  -4  -1  279.27    9.60
   2  -4  -1  283.37   10.20
   2  -4  -1  269.47    9.50
   2  -4  -1  279.97   10.10
  -2  -4   1  283.37   10.10
  -2  -4   1  278.27   10.20
  -2   4   1  281.27   10.10
   2   4  -1  284.57   10.40
   2   4  -1  278.47   10.10
  -2   4   1  273.47   10.10
   2   4  -1  274.77   10.10
   2   4  -1  279.27   10.10
  -2   4   1  255.77    9.50
   2   4  -1  271.37    9.70
   2   4  -1  281.07    9.60
   2   4  -1  266.27   10.20
  -2   4   1  277.77   10.00
   2   4  -1  278.47    9.50
   2   4  -1  277.37    9.70
   1  -4  -1   74.89    3.40
   1  -4  -1   68.09    3.30
   1  -4  -1   83.39    3.50
   1  -4  -1   61.89    3.30
  -1  -4   1   74.99    3.20
   1  -4  -1   83.49    3.40
   1  -4  -1   79.99    3.10
   1   4  -1   83.19    3.10
   1   4  -1   57.19    3.20
   1   4  -1   68.59    3.30
   1   4  -1   81.09    2.80
  -1   4   1   76.09    3.40
   1   4  -1   71.99    3.50
  -1   4   1   81.69    3.40
   0  -4   1  233.58    7.70
   0   4   1  232.48    7.70
   0   4  -1  221.38    7.60
   0   4   1  228.48    7.70
   0   4  -1  216.78    7.60
   0   4  -1  232.38    7.70
   1  -4   1  316.57   10.00
   1  -4   1  312.87   10.50
  -1  -4  -1  297.47   10.30
   1  -4   1  311.77   10.30
   1  -4   1  264.27   10.20
  -1  -4  -1  302.17   10.60
   1  -4   1  248.68   10.50
   1   4   1  257.77   10.50
   1   4   1  304.47   10.10
  -1   4  -1  302.97   10.30
   1   4   1  303.27   10.30
   1   4   1  320.57   10.20
   2  -4   1  249.97    9.70
   2  -4   1  243.78   10.10
   2  -4   1  242.38    9.00
   2  -4   1  254.27    9.50
   2  -4   1  252.97    8.70
   2  -4   1  267.87    9.60
  -2  -4  -1  251.37    9.90
   2  -4   1  256.17    9.60
  -2  -4  -1  249.88    8.80
  -2  -4  -1  261.17    9.20
   2   4   1  258.87    9.60
  -2   4  -1  251.77    9.50
   2   4   1  258.27   10.00
  -2   4  -1  251.47    9.50
  -2   4  -1  262.97    8.80
   2   4   1  254.57    9.50
   2   4   1  246.58    9.10
  -2   4  -1  250.17    9.10
   2   4   1  256.67    9.40
   2   4   1  250.77    9.40
   3  -4   1  265.07   10.40
   3  -4   1  267.17    9.60
   3  -4   1  270.67    9.50
   3  -4   1  255.27   10.60
   3  -4   1  268.87   11.40
  -3  -4  -1  276.97   11.30
   3  -4   1  269.07   10.50
  -3  -4  -1  272.97    9.30
  -3  -4  -1  266.67    9.70
   3  -4   1  246.88   10.40
   3  -4   1  275.97   10.10
  -3  -4  -1  275.97   10.20
   3   4   1  246.88   10.40
  -3   4  -1  272.77    9.90
   3   4   1  264.67   10.20
   3   4   1  271.87    9.30
  -3   4  -1  263.87    9.60
   3   4   1  267.07   10.60
   3   4   1  263.07   10.00
  -3   4  -1  266.67   10.30
   3   4   1  269.37   11.30
   3   4   1  259.27   10.30
  -3   4  -1  275.27   10.50
   3   4   1  282.07   10.30
   4  -4   1  196.38    7.80
   4  -4   1  216.48    9.00
   4  -4   1  200.98    8.90
   4  -4   1  186.28    9.10
   4  -4   1  203.68    9.10
  -4  -4  -1  213.28   10.00
  -4  -4  -1  198.18    8.50
   4  -4   1  202.38    8.40
  -4  -4  -1  199.78    8.00
   4  -4   1  201.18   10.20
   4   4   1  224.08    8.90
  -4   4  -1  207.78    8.90
   4   4   1  193.58    8.90
  -4   4  -1  206.38    8.80
   4   4   1  195.18    9.90
   4   4   1  192.88    9.20
   4   4   1  181.68    8.50
  -4   4  -1  203.28    8.10
   4   4   1  192.88    8.40
   4   4   1  198.78    8.30
  -4   4  -1  211.28    8.60
   5  -4   1   12.50    3.40
  -5  -4  -1   17.80    3.00
  -5  -4  -1   11.60    2.80
   5  -4   1   12.90    3.10
   5  -4   1   17.30    3.10
   5  -4   1   17.80    4.40
   5  -4   1   11.10    2.70
  -5  -4  -1   17.30    2.40
   5  -4   1    9.40    3.20
  -5  -4  -1   17.20    4.00
   5   4   1   16.50    3.30
   5   4   1   17.90    3.20
  -5   4  -1   17.90    4.20
   5   4   1   16.90    3.30
  -5   4  -1   11.80    3.40
  -5   4  -1   16.40    3.00
  -5   4  -1   18.00    2.70
  -5   4  -1   14.40    3.00
   5   4   1   11.90    2.80
   5   4   1   24.00    4.60
   5   4   1   15.60    3.10
   6  -4   1    6.60    3.40
  -6  -4  -1    4.80    2.90
   6  -4   1   11.80    2.90
   6  -4   1    3.90    3.50
   6  -4   1    9.40    3.20
  -6  -4  -1    8.90    3.00
   6  -4   1    9.10    4.40
  -6  -4  -1    5.60    4.10
  -6   4  -1    4.10    2.80
   6   4   1    7.60    4.50
  -6   4  -1   12.20    3.40
  -6   4  -1   13.80    4.50
   6   4   1   10.80    3.60
   6   4   1    9.60    3.40
   6   4   1    5.10    2.70
  -6   4  -1    8.40    3.60
   6   4   1    9.10    3.40
   7  -4   1   -5.30    3.20
   7  -4   1    5.70    4.60
  -7  -4  -1    1.90    3.10
  -7  -4  -1    3.00    2.90
   7  -4   1    1.30    3.50
  -7  -4  -1   -4.20    4.00
  -7  -4  -1    0.30    2.80
   7   4   1    1.40    4.90
  -7   4  -1    3.10    3.60
  -7   4  -1    1.00    3.20
   7   4   1   -0.30    3.30
   7   4   1   -0.60    3.10
   7   4   1    0.40    2.80
  -7   4  -1    0.60    3.00
   8  -5  -1   13.90    6.80
  -8  -5   1    8.50    3.90
  -8  -5   1   13.40    4.80
  -8  -5   1   11.40    5.50
   8  -5  -1   10.00    4.40
   8  -5  -1    6.30    5.40
   8   5  -1    7.70    4.10
   8   5  -1    2.10    4.60
   8   5  -1    5.90    5.10
  -8   5   1    9.20    4.10
  -8   5   1    3.40    4.50
  -8   5   1    8.20    4.20
   7  -5  -1   48.30    5.70
   7  -5  -1   44.50    5.90
   7  -5  -1   57.39    6.40
  -7  -5   1   43.50    6.80
   7  -5  -1   47.80    6.10
  -7  -5   1   53.19    5.80
  -7  -5   1   58.69    6.50
   7  -5  -1   45.40    6.70
   7   5  -1   48.80    6.40
   7   5  -1   54.79    7.20
   7   5  -1   53.89    6.20
  -7   5   1   58.59    6.40
  -7   5   1   54.29    6.20
  -7   5   1   44.70    6.50
  -7   5   1   46.90    5.70
  -6  -5   1   -1.70    2.20
   6  -5  -1    2.40    2.70
   6  -5  -1   -0.40    2.60
  -6  -5   1    3.70    3.10
  -6  -5   1   -3.30    3.30
   6  -5  -1   -0.30    2.60
  -6  -5   1   -2.50    2.70
   6  -5  -1    4.70    3.30
   6  -5  -1    2.00    3.70
   6  -5  -1    3.10    3.20
   6   5  -1   -0.20    3.20
   6   5  -1   -2.30    2.30
  -6   5   1   -3.40    2.80
   6   5  -1    0.40    3.80
  -6   5   1    1.20    3.10
   6   5  -1   -3.20    2.70
   6   5  -1    3.10    2.80
  -6   5   1   -0.10    3.40
   6   5  -1   -2.20    1.70
  -6   5   1    2.10    2.40
  -6   5   1    1.00    2.60
   5  -5  -1   76.09    4.80
   5  -5  -1   68.19    4.50
  -5  -5   1   71.19    5.40
   5  -5  -1   65.59    4.70
   5  -5  -1   73.49    5.50
   5  -5  -1   70.89    5.20
   5  -5  -1   69.39    6.20
  -5  -5   1   69.29    4.60
   5  -5  -1   65.19    4.70
   5  -5  -1   69.39    5.40
  -5  -5   1   75.79    6.00
   5   5  -1   66.49    5.00
   5   5  -1   80.29    5.00
  -5   5   1   63.09    5.30
  -5   5   1   72.59    5.20
  -5   5   1   67.69    5.10
   5   5  -1   71.69    6.30
   5   5  -1   72.59    4.90
   5   5  -1   65.69    5.00
   5   5  -1   61.49    4.60
  -5   5   1   78.29    4.90
   5   5  -1   75.99    5.80
  -5   5   1   76.19    4.70
  -4  -5   1   28.00    2.40
  -4  -5   1   30.50    3.50
   4  -5  -1   25.40    2.30
   4  -5  -1   31.00    3.30
   4  -5  -1   28.50    2.80
   4  -5  -1   33.00    3.20
  -4  -5   1   29.60    3.90
   4  -5  -1   30.50    3.30
   4  -5  -1   29.70    2.90
   4  -5  -1   28.30    2.60
   4  -5  -1   29.20    4.00
   4  -5  -1   26.00    3.00
  -4  -5   1   28.70    2.80
   4   5  -1   29.10    3.30
  -4   5   1   32.10    3.20
   4   5  -1   31.90    2.90
   4   5  -1   29.90    3.00
  -4   5   1   27.80    2.30
   4   5  -1   27.10    3.40
   4   5  -1   28.80    2.60
   4   5  -1   37.10    4.20
  -4   5   1   29.30    3.10
  -4   5   1   26.30    3.10
   4   5  -1   25.80    3.00
  -4   5   1   30.40    3.20
  -4   5   1   27.70    2.80
   4   5  -1   29.30    2.90
   4   5  -1   31.60    2.50
  -3  -5   1  234.18    9.80
   3  -5  -1  240.28    9.00
  -3  -5   1  248.58    9.10
   3  -5  -1  241.68    9.50
   3  -5  -1  237.98    9.40
   3  -5  -1  234.08    9.60
   3  -5  -1  250.37    9.60
   3  -5  -1  261.67    9.00
   3  -5  -1  239.48    9.70
   3  -5  -1  237.28   10.30
  -3  -5   1  249.08    9.70
   3  -5  -1  245.58    9.70
  -3  -5   1  247.78    8.80
  -3   5   1  254.37    8.90
  -3   5   1  243.58    9.50
   3   5  -1  250.77   10.20
   3   5  -1  239.68    9.80
   3   5  -1  247.88    9.00
   3   5  -1  236.48    9.50
   3   5  -1  241.18    9.70
  -3   5   1  238.58    9.60
  -3   5   1  247.18    9.40
   3   5  -1  242.18    8.80
   3   5  -1  259.37    9.20
  -3   5   1  236.08    9.60
   3   5  -1  245.08    9.80
   3   5  -1  241.98    9.20
   2  -5  -1    3.90    1.40
   2  -5  -1    3.60    1.10
   2  -5  -1    2.50    1.20
  -2  -5   1    2.70    0.70
  -2  -5   1    3.80    1.10
  -2  -5   1    5.30    1.20
   2  -5  -1    3.00    0.80
  -2  -5   1    4.30    0.80
   2  -5  -1    5.70    1.60
   2  -5  -1    1.80    1.00
   2  -5  -1    3.40    1.10
   2  -5  -1    2.70    0.90
   2  -5  -1    4.80    1.40
  -2   5   1    2.60    0.90
   2   5  -1    4.50    1.50
   2   5  -1    3.80    1.00
   2   5  -1    3.20    1.10
  -2   5   1    2.10    1.10
  -2   5   1    5.00    1.50
   2   5  -1    3.40    1.10
  -2   5   1    5.00    1.50
   2   5  -1    4.00    1.50
   2   5  -1    3.50    0.90
  -2   5   1    4.60    1.30
   2   5  -1    3.40    1.20
   2   5  -1    4.00    0.80
   2   5  -1    3.40    1.10
   1  -5  -1   67.39    2.90
   1  -5  -1   52.09    2.80
  -1  -5   1   65.49    2.80
   1  -5  -1   59.59    2.80
  -1  -5   1   58.69    2.70
   1  -5  -1   53.09    2.70
   1  -5  -1   67.49    2.40
   1  -5  -1   68.89    3.10
   1   5  -1   51.49    2.70
   1   5  -1   63.99    2.60
   1   5  -1   66.19    2.80
   1   5  -1   63.39    3.10
   1   5  -1   63.79    2.20
  -1   5   1   65.19    2.90
  -1   5   1   63.49    2.80
   1   5  -1   48.80    2.60
   0  -5  -1 3847.22  123.99
   0  -5   1 3898.51  123.89
   0  -5  -1 3873.81  124.79
   0   5   1 3814.72  123.89
   0   5  -1 3769.42  123.39
   0   5  -1 3827.82  123.49
   0   5   1 3914.11  123.39
   0   5  -1 3889.31  123.39
   0   5   1 3912.61  123.59
   0   5  -1 3688.63  123.39
  -1  -5  -1 8115.69  253.17
   1  -5   1 6825.72  251.87
  -1  -5  -1 8130.09  251.97
   1  -5   1 7848.21  252.87
   1  -5   1 7691.73  251.97
   1  -5   1 8285.27  252.17
   1  -5   1 8066.49  252.77
   1  -5   1 8182.28  253.67
   1   5   1 7361.76  251.87
  -1   5  -1 8052.69  251.87
  -1   5  -1 8471.25  253.17
   1   5   1 6607.04  251.87
   1   5   1 8156.08  254.87
   1   5   1 8002.60  252.97
   1   5   1 8029.60  252.57
  -2  -5  -1   84.39    3.30
   2  -5   1   83.49    4.30
   2  -5   1   78.09    4.50
  -2  -5  -1   87.29    3.70
   2  -5   1   76.29    4.00
   2  -5   1   84.09    4.20
   2  -5   1   82.79    3.30
  -2  -5  -1   85.29    4.10
   2  -5   1   83.99    3.60
  -2  -5  -1   83.79    4.60
   2  -5   1   78.49    4.30
   2   5   1   83.59    4.50
   2   5   1   81.19    3.80
   2   5   1   84.89    3.90
  -2   5  -1   85.59    3.50
  -2   5  -1   86.99    4.20
   2   5   1   85.79    4.20
   2   5   1   86.29    4.10
   2   5   1   87.69    4.00
  -2   5  -1   84.29    4.20
  -2   5  -1   89.29    3.80
   3  -5   1    2.70    1.40
   3  -5   1    4.60    1.80
  -3  -5  -1    4.60    0.90
   3  -5   1    5.40    1.60
  -3  -5  -1    6.90    1.60
   3  -5   1    5.70    1.90
  -3  -5  -1    6.60    2.30
   3  -5   1    7.00    1.20
  -3  -5  -1    3.40    1.10
   3  -5   1    6.70    2.10
   3  -5   1    2.90    1.90
  -3   5  -1    6.00    1.80
   3   5   1    5.60    2.00
   3   5   1    5.90    1.40
   3   5   1    7.00    1.80
   3   5   1    6.00    1.70
  -3   5  -1    4.80    1.90
  -3   5  -1    6.40    1.40
  -3   5  -1    3.50    1.20
   3   5   1    5.30    0.90
   3   5   1    3.80    1.80
   3   5   1    4.50    1.70
   4  -5   1    0.30    1.60
   4  -5   1    2.10    2.10
  -4  -5  -1    0.80    2.40
   4  -5   1   -2.30    1.90
   4  -5   1    3.30    1.90
   4  -5   1    2.90    1.70
  -4  -5  -1    2.60    1.30
   4  -5   1    6.70    2.80
  -4  -5  -1    1.80    1.70
  -4  -5  -1    2.10    1.70
  -4   5  -1    4.40    1.60
   4   5   1    0.30    1.70
   4   5   1    3.60    1.70
  -4   5  -1   -0.30    1.80
   4   5   1    3.70    1.90
  -4   5  -1    4.10    1.80
   4   5   1    1.10    2.60
   4   5   1    0.40    1.60
   4   5   1    0.10    2.00
  -4   5  -1    3.30    1.60
  -4   5  -1    2.20    1.80
  -5  -5  -1  127.59    7.90
   5  -5   1  123.49    8.20
   5  -5   1  129.49    7.20
  -5  -5  -1  139.79    6.90
  -5  -5  -1  114.89    7.40
   5  -5   1  134.39    7.00
   5  -5   1  120.89    7.50
   5  -5   1  113.69    7.40
   5  -5   1  120.19    6.60
  -5   5  -1  134.69    6.80
   5   5   1  132.79    7.40
  -5   5  -1  117.09    6.90
  -5   5  -1  139.79    6.40
   5   5   1  137.19    7.90
   5   5   1  127.29    6.90
   5   5   1  124.49    7.10
   5   5   1  135.39    8.30
  -5   5  -1  125.79    7.50
   6  -5   1   21.70    4.60
   6  -5   1   25.20    3.70
   6  -5   1   27.90    5.90
  -6  -5  -1   28.90    4.10
   6  -5   1   28.20    4.80
  -6  -5  -1   22.60    4.10
   6  -5   1   36.60    5.20
  -6  -5  -1   28.70    5.00
   6   5   1   24.60    4.00
  -6   5  -1   28.20    4.60
  -6   5  -1   25.00    4.20
   6   5   1   35.90    4.60
   6   5   1   27.60    4.50
   6   5   1   22.30    4.90
  -6   5  -1   22.30    5.20
   6   5   1   31.50    4.50
  -6   5  -1   29.10    4.40
   7  -5   1    7.50    3.90
   7  -5   1   -1.10    2.40
  -7  -5  -1   10.30    3.60
  -7  -5  -1    2.90    3.00
  -7  -5  -1    1.10    4.20
  -7   5  -1    1.10    3.50
   7   5   1   -2.40    2.60
  -7   5  -1   -2.00    2.90
   7   5   1    3.70    4.90
   7   5   1    2.00    3.60
  -8  -6   1   11.90    4.10
  -8  -6   1   19.70    6.10
  -8  -6   1    5.30    4.30
   8  -6  -1    5.20    3.30
   8  -6  -1   12.50    5.80
   8   6  -1    3.00    4.60
   8   6  -1   10.20    5.60
   8   6  -1   13.30    4.40
  -8   6   1    9.70    5.00
  -8   6   1    4.00    3.10
   7  -6  -1   20.70    4.40
   7  -6  -1   41.60    6.80
  -7  -6   1   20.20    4.80
  -7  -6   1   23.70    4.40
   7  -6  -1   24.90    4.90
  -7  -6   1   24.60    5.80
   7  -6  -1   22.20    4.50
   7  -6  -1   26.60    5.00
  -7   6   1   23.20    4.70
   7   6  -1   21.30    4.90
   7   6  -1   18.10    4.30
   7   6  -1   24.60    4.70
  -7   6   1   22.20    4.60
  -7   6   1   15.50    4.10
  -7   6   1   36.20    6.40
   7   6  -1   33.00    6.20
  -6  -6   1  162.38    9.20
   6  -6  -1  156.28    8.80
  -6  -6   1  154.48    8.00
   6  -6  -1  159.38    9.10
   6  -6  -1  162.28    8.20
  -6  -6   1  152.28    9.30
  -6  -6   1  157.48    9.30
   6  -6  -1  148.49    9.60
   6  -6  -1  161.78    8.70
   6  -6  -1  152.08    9.00
  -6   6   1  160.38    9.00
   6   6  -1  161.38    8.90
   6   6  -1  178.88    8.50
  -6   6   1  159.28    8.10
   6   6  -1  165.48    8.70
  -6   6   1  143.39    9.30
   6   6  -1  159.88    9.70
   6   6  -1  156.48    9.40
  -6   6   1  153.18    8.30
  -6   6   1  160.58    9.00
   5  -6  -1   78.39    5.10
   5  -6  -1   87.99    5.90
   5  -6  -1   62.69    4.60
  -5  -6   1   73.79    5.60
  -5  -6   1   73.09    4.70
   5  -6  -1   76.19    5.50
   5  -6  -1   69.89    5.60
   5  -6  -1   82.69    6.60
   5  -6  -1   73.79    5.10
  -5  -6   1   79.49    6.20
   5  -6  -1   69.19    5.30
   5   6  -1   80.99    6.00
   5   6  -1   78.79    6.50
  -5   6   1   72.79    5.30
   5   6  -1   71.39    5.50
  -5   6   1   78.49    5.00
  -5   6   1   79.39    5.10
   5   6  -1   70.59    5.20
   5   6  -1   73.99    5.40
   5   6  -1   70.69    4.90
   5   6  -1   85.79    5.10
  -5   6   1   78.19    5.50
  -5   6   1   69.79    5.60
   4  -6  -1    0.00    2.10
   4  -6  -1    3.00    1.70
   4  -6  -1    2.20    2.10
   4  -6  -1    0.60    1.40
   4  -6  -1    0.20    1.70
   4  -6  -1   -0.60    1.60
  -4  -6   1    1.40    1.20
  -4  -6   1   -2.70    2.00
   4  -6  -1    1.40    1.40
  -4  -6   1    0.60    1.50
  -4  -6   1   -1.20    1.20
   4  -6  -1   -1.60    1.80
   4  -6  -1    2.90    1.90
   4   6  -1   -0.50    1.30
   4   6  -1   -0.40    1.30
   4   6  -1   -1.00    1.30
  -4   6   1    0.10    1.50
  -4   6   1   -0.30    1.00
  -4   6   1   -0.90    1.90
  -4   6   1    1.10    1.80
   4   6  -1    0.70    1.40
   4   6  -1   -3.20    2.00
   4   6  -1    0.30    1.50
  -4   6   1    3.00    1.80
   4   6  -1   -1.80    1.10
   4   6  -1    2.50    2.00
   4   6  -1    1.40    1.90
  -3  -6   1   13.80    1.60
   3  -6  -1   12.00    2.20
   3  -6  -1   12.00    2.20
   3  -6  -1   11.30    2.50
  -3  -6   1   16.80    2.50
   3  -6  -1   11.90    1.50
  -3  -6   1   14.20    2.30
   3  -6  -1   12.30    1.90
   3  -6  -1   12.90    1.60
   3  -6  -1   14.90    2.20
   3  -6  -1   15.00    2.10
   3  -6  -1   15.30    2.40
  -3  -6   1   14.20    1.40
   3   6  -1   14.70    2.50
   3   6  -1   11.40    2.10
   3   6  -1    9.60    2.20
   3   6  -1   15.10    1.70
  -3   6   1   15.00    2.20
  -3   6   1   15.60    1.60
   3   6  -1   17.50    2.40
   3   6  -1   15.00    1.70
   3   6  -1   15.40    2.40
  -3   6   1   12.00    2.30
   3   6  -1   14.60    1.80
  -3   6   1   14.10    2.00
   3   6  -1   11.50    1.40
  -3   6   1   17.30    2.30
   2  -6  -1 1484.65   48.30
  -2  -6   1 1433.26   47.20
  -2  -6   1 1445.96   47.40
   2  -6  -1 1419.26   48.50
  -2  -6   1 1459.65   48.20
   2  -6  -1 1456.75   48.10
  -2  -6   1 1468.65   48.10
   2  -6  -1 1491.75   48.10
   2  -6  -1 1477.55   48.20
   2  -6  -1 1448.96   48.20
   2  -6  -1 1448.56   47.30
   2  -6  -1 1521.15   47.40
   2  -6  -1 1451.95   47.70
   2   6  -1 1430.66   47.60
  -2   6   1 1472.85   48.10
   2   6  -1 1461.75   48.10
   2   6  -1 1435.16   48.30
  -2   6   1 1526.35   47.40
   2   6  -1 1446.16   48.20
  -2   6   1 1466.05   48.10
   2   6  -1 1459.55   47.20
  -2   6   1 1478.35   48.20
  -2   6   1 1445.96   48.20
   2   6  -1 1421.56   47.50
   2   6  -1 1495.95   48.20
   1  -6  -1   90.69    4.20
   1  -6  -1   98.09    4.20
   1  -6  -1  104.09    4.40
   1  -6  -1  100.59    4.10
  -1  -6   1   94.49    4.10
   1  -6  -1  105.69    3.70
  -1  -6   1  104.59    4.00
   1  -6  -1   99.19    4.20
   1   6  -1  101.09    3.50
  -1   6   1   97.49    4.10
   1   6  -1   82.79    4.00
   1   6  -1   95.99    4.10
  -1   6   1   97.79    4.10
   1   6  -1  101.89    3.90
   1   6  -1  102.69    4.30
  -1   6   1  101.79    4.20
   0  -6  -1 1640.14   53.59
   0  -6   1 1694.43   53.59
   0  -6  -1 1682.73   53.99
   0  -6   1 1756.12   53.79
   0   6  -1 1569.04   53.59
   0   6  -1 1657.63   53.79
   0   6  -1 1629.74   53.59
   0   6  -1 1656.63   53.59
   0   6   1 1643.94   53.69
   0   6   1 1666.63   53.99
   0   6   1 1678.73   53.69
  -1  -6  -1 8866.81  309.87
   1  -6   1 9880.21  310.67
   1  -6   1 9844.12  310.97
  -1  -6  -1 9533.95  309.07
   1  -6   1 9829.92  309.27
  -1  -6  -1 9548.64  310.37
   1  -6   1 9570.64  310.17
   1  -6   1 9974.50  310.07
   1  -6   1 9484.75  308.47
   1   6   1 9584.44  308.67
  -1   6  -1 9820.12  310.47
  -1   6  -1 9999.00  310.17
   1   6   1 9263.77  308.37
   1   6   1 9759.22  310.17
   1   6   1 9550.44  310.87
  -1   6  -1 9525.95  308.77
   1   6   1 9454.55  311.97
   2  -6   1  144.29    6.40
   2  -6   1  145.39    6.10
  -2  -6  -1  150.58    5.90
   2  -6   1  144.09    5.70
  -2  -6  -1  152.98    6.80
  -2  -6  -1  146.99    6.20
   2  -6   1  153.68    6.50
   2  -6   1  149.49    7.00
  -2  -6  -1  149.99    5.40
   2  -6   1  142.39    6.20
  -2   6  -1  149.49    6.20
   2   6   1  148.29    6.30
  -2   6  -1  153.48    6.30
  -2   6  -1  151.08    5.90
   2   6   1  152.98    6.10
   2   6   1  149.29    6.30
   2   6   1  158.88    6.90
  -2   6  -1  151.98    5.70
   2   6   1  149.59    6.00
  -2   6  -1  153.28    6.40
   2   6   1  146.09    6.40
   3  -6   1  244.58    9.80
   3  -6   1  241.38    9.70
  -3  -6  -1  234.58    8.70
   3  -6   1  233.48    9.90
  -3  -6  -1  231.38   10.30
   3  -6   1  240.38   10.60
   3  -6   1  245.88    8.50
  -3  -6  -1  252.17    8.40
  -3  -6  -1  234.88    9.90
   3  -6   1  228.68    9.00
  -3  -6  -1  251.07    9.30
   3  -6   1  245.78    9.70
   3   6   1  253.07   10.70
  -3   6  -1  249.18    9.80
   3   6   1  238.38    9.30
  -3   6  -1  223.18    9.70
   3   6   1  244.78    8.30
   3   6   1  241.28   10.00
   3   6   1  244.88    9.50
   3   6   1  232.88    9.80
   3   6   1  242.08    9.60
  -3   6  -1  249.58    9.20
  -3   6  -1  252.17    8.90
  -3   6  -1  256.67    9.80
  -4  -6  -1   32.00    4.20
  -4  -6  -1   27.10    2.90
   4  -6   1   21.70    3.20
  -4  -6  -1   24.60    2.30
   4  -6   1   26.00    3.30
   4  -6   1   20.50    2.50
   4  -6   1   22.10    3.60
   4  -6   1   23.00    3.50
   4  -6   1   18.80    3.00
  -4  -6  -1   21.30    3.30
  -4   6  -1   22.00    3.30
  -4   6  -1   22.40    3.10
   4   6   1   22.60    3.90
   4   6   1   25.20    3.20
   4   6   1   18.80    2.80
   4   6   1   21.40    3.00
   4   6   1   23.70    2.80
   4   6   1   19.70    3.30
  -4   6  -1   16.30    3.10
  -4   6  -1   26.10    2.70
   5  -6   1   11.40    3.40
   5  -6   1   11.80    2.70
  -5  -6  -1   19.00    3.00
   5  -6   1    6.50    2.50
   5  -6   1   10.70    2.90
   5  -6   1   14.40    3.30
   5  -6   1   13.00    4.20
  -5  -6  -1   13.50    3.40
  -5  -6  -1   19.10    4.10
   5   6   1   15.70    3.30
   5   6   1   17.70    3.90
  -5   6  -1   18.30    2.80
   5   6   1   14.10    3.10
  -5   6  -1   16.10    3.40
   5   6   1   17.70    4.30
  -5   6  -1    8.90    3.30
  -5   6  -1   12.40    3.10
   5   6   1   10.60    2.80
   6  -6   1   23.90    5.40
   6  -6   1   12.80    3.50
   6  -6   1   13.00    3.80
  -6  -6  -1   27.20    5.40
  -6  -6  -1   15.80    3.50
  -6  -6  -1   14.60    3.60
   6  -6   1   18.00    4.10
   6  -6   1   10.90    4.00
   6   6   1   15.80    4.00
   6   6   1   17.20    3.70
  -6   6  -1   15.50    3.70
  -6   6  -1   17.50    3.60
  -6   6  -1   19.30    4.90
   6   6   1   15.20    5.10
   6   6   1   14.90    3.60
  -6   6  -1   18.10    4.30
   6   6   1   19.30    4.00
   7  -6   1   66.99    6.20
   7  -6   1   67.29    6.30
  -7  -6  -1   72.49    8.20
   7  -6   1   75.09    8.70
  -7  -6  -1   76.39    6.30
  -7  -6  -1   80.39    6.70
   7   6   1   70.79    7.30
  -7   6  -1   76.29    8.40
  -7   6  -1   72.29    6.40
   7   6   1   73.99    8.60
   7   6   1   70.99    6.70
  -7   6  -1   69.59    6.10
   8  -7  -1   19.40    5.10
  -8  -7   1    9.40    3.90
   8  -7  -1   15.40    7.10
  -8  -7   1   26.20    4.60
   8  -7  -1   28.50    6.90
  -8  -7   1   14.20    5.60
  -8   7   1   35.60    7.00
   8   7  -1   12.70    4.00
  -8   7   1   15.80    4.90
   8   7  -1   13.50    6.00
  -8   7   1   26.20    5.30
   8   7  -1   16.90    5.50
   7  -7  -1   45.90    5.90
   7  -7  -1   51.49    6.20
   7  -7  -1   58.99    8.10
  -7  -7   1   55.09    5.80
   7  -7  -1   47.60    7.60
   7  -7  -1   55.19    6.50
  -7  -7   1   49.80    6.20
  -7  -7   1   43.30    6.90
   7   7  -1   49.00    6.60
  -7   7   1   60.99    7.90
  -7   7   1   47.20    6.20
   7   7  -1   47.00    5.80
  -7   7   1   51.39    7.40
   7   7  -1   57.59    7.70
  -7   7   1   47.30    5.80
   7   7  -1   51.59    6.00
   6  -7  -1   22.50    3.80
   6  -7  -1   15.20    4.10
   6  -7  -1   29.20    4.30
  -6  -7   1   24.20    4.40
   6  -7  -1   15.80    3.30
  -6  -7   1   13.80    3.10
   6  -7  -1   16.40    4.70
  -6  -7   1   18.10    4.70
   6  -7  -1   16.30    4.00
  -6   7   1   18.00    3.60
   6   7  -1   18.90    4.40
  -6   7   1   17.80    4.00
   6   7  -1   19.30    3.90
  -6   7   1   22.30    4.10
  -6   7   1   18.90    4.10
   6   7  -1   23.30    5.10
   6   7  -1   14.00    3.30
   5  -7  -1    2.60    2.50
  -5  -7   1    5.00    2.80
   5  -7  -1    3.30    2.60
   5  -7  -1    1.40    2.30
  -5  -7   1    2.20    1.90
   5  -7  -1    3.90    2.20
   5  -7  -1    0.90    2.40
  -5  -7   1    4.80    2.20
   5  -7  -1    3.40    2.90
   5  -7  -1    2.00    2.70
   5   7  -1    4.00    3.20
   5   7  -1    5.50    2.70
   5   7  -1    1.30    2.60
   5   7  -1   -0.20    2.00
  -5   7   1    6.00    2.90
  -5   7   1    4.70    1.90
  -5   7   1    3.50    2.50
  -5   7   1    2.80    2.50
   5   7  -1    2.50    2.40
  -5   7   1    3.30    2.40
   5   7  -1    0.50    2.30
  -4  -7   1  244.78   10.40
   4  -7  -1  241.98   10.30
   4  -7  -1  242.38    9.10
   4  -7  -1  234.58    9.20
  -4  -7   1  245.18    9.00
   4  -7  -1  258.77   10.10
   4  -7  -1  235.58   11.00
   4  -7  -1  237.28   10.40
   4  -7  -1  229.68    9.90
  -4  -7   1  241.78   10.60
  -4  -7   1  249.38    9.40
   4  -7  -1  245.18   10.50
   4  -7  -1  253.47   10.10
   4   7  -1  233.78   10.20
  -4   7   1  249.58    9.90
  -4   7   1  241.08   10.30
   4   7  -1  249.68   10.50
   4   7  -1  244.98    9.00
   4   7  -1  239.58   10.10
   4   7  -1  248.58   10.80
  -4   7   1  230.78   10.30
   4   7  -1  230.78   10.20
  -4   7   1  248.38   10.00
   4   7  -1  227.98    9.60
  -4   7   1  254.57    9.10
   4   7  -1  231.88    9.10
  -3  -7   1   62.69    2.90
   3  -7  -1   66.09    3.70
   3  -7  -1   61.29    3.10
   3  -7  -1   63.69    4.20
   3  -7  -1   60.79    4.10
   3  -7  -1   58.49    4.20
  -3  -7   1   59.99    4.00
  -3  -7   1   72.39    4.30
   3  -7  -1   68.39    3.10
   3  -7  -1   65.69    3.70
   3  -7  -1   69.79    3.90
   3  -7  -1   64.29    4.10
  -3  -7   1   61.89    3.20
   3   7  -1   65.89    3.30
  -3   7   1   69.59    3.10
   3   7  -1   66.29    3.00
   3   7  -1   67.29    4.50
  -3   7   1   72.99    4.00
   3   7  -1   66.79    4.20
  -3   7   1   68.59    3.80
  -3   7   1   61.29    4.10
   3   7  -1   60.39    4.10
   3   7  -1   65.39    3.40
   3   7  -1   61.29    3.80
  -3   7   1   68.09    4.10
   3   7  -1   67.39    4.20
  -2  -7   1 1151.48   37.30
  -2  -7   1 1152.98   38.20
   2  -7  -1 1120.39   38.10
  -2  -7   1 1167.38   38.10
   2  -7  -1 1143.89   38.10
   2  -7  -1 1142.89   38.20
   2  -7  -1 1136.69   37.70
   2  -7  -1 1093.09   38.50
   2  -7  -1 1151.58   38.20
   2  -7  -1 1141.49   37.10
   2   7  -1 1193.18   38.20
   2   7  -1 1142.49   37.40
  -2   7   1 1129.39   38.20
   2   7  -1 1140.49   38.20
   2   7  -1 1127.79   37.50
  -2   7   1 1180.58   38.10
  -2   7   1 1186.28   37.30
  -2   7   1 1139.09   38.20
   2   7  -1 1152.78   38.10
  -2   7   1 1180.98   38.10
   2   7  -1 1109.19   38.30
   1  -7  -1 1033.50   34.30
   1  -7  -1 1074.59   34.50
   1  -7  -1 1056.59   34.20
  -1  -7   1 1005.70   34.10
   1  -7  -1 1060.09   34.20
   1  -7  -1 1053.69   33.70
  -1  -7   1 1011.60   34.00
  -1  -7   1 1038.30   34.10
   1   7  -1 1047.80   33.50
   1   7  -1 1024.40   34.10
  -1   7   1 1022.30   34.10
  -1   7   1 1025.20   34.20
   1   7  -1 1049.59   34.50
   1   7  -1 1023.40   34.20
  -1   7   1 1054.59   34.30
   1   7  -1 1011.90   33.80
   0  -7  -1 1323.27   42.70
   0  -7   1 1212.78   42.70
   0  -7   1 1380.46   42.90
   0  -7   1 1339.17   42.70
   0  -7   1 1387.16   43.30
   0  -7  -1 1270.57   42.80
   0  -7  -1 1349.16   43.20
   0   7   1 1329.17   43.20
   0   7  -1 1315.07   42.80
   0   7  -1 1268.77   42.70
   0   7  -1 1307.87   43.10
   0   7   1 1316.07   42.80
   0   7   1 1334.17   42.80
   0   7  -1 1334.27   42.90
   0   7   1 1315.57   42.90
  -1  -7  -1 1437.56   48.40
  -1  -7  -1 1467.55   48.70
  -1  -7  -1 1483.05   48.10
   1  -7   1 1486.55   48.50
   1  -7   1 1460.05   48.50
   1  -7   1 1539.55   48.40
   1  -7   1 1504.35   49.00
   1  -7   1 1468.25   48.50
   1  -7   1 1485.75   47.90
   1   7   1 1480.75   48.50
   1   7   1 1465.65   48.40
  -1   7  -1 1491.25   48.30
   1   7   1 1487.65   47.80
  -1   7  -1 1451.75   48.50
   1   7   1 1505.85   48.20
   1   7   1 1449.65   48.50
  -1   7  -1 1501.25   48.40
   1   7   1 1514.65   48.50
  -1   7  -1 1483.85   48.50
  -2  -7  -1   45.00    3.40
  -2  -7  -1   48.90    2.60
  -2  -7  -1   45.80    2.00
   2  -7   1   45.90    2.70
   2  -7   1   42.90    2.30
   2  -7   1   45.50    3.10
   2  -7   1   44.70    3.30
   2  -7   1   44.00    2.90
   2  -7   1   46.40    3.00
  -2  -7  -1   45.90    3.10
   2   7   1   47.80    3.60
   2   7   1   45.40    2.70
  -2   7  -1   49.90    2.70
   2   7   1   42.80    3.00
   2   7   1   48.60    3.20
   2   7   1   46.50    3.20
  -2   7  -1   44.50    3.10
   2   7   1   46.30    2.80
  -2   7  -1   45.20    2.40
  -2   7  -1   45.90    3.00
   3  -7   1   35.10    3.50
   3  -7   1   32.40    3.00
   3  -7   1   30.40    2.30
   3  -7   1   37.90    3.50
  -3  -7  -1   34.00    1.70
   3  -7   1   37.20    1.90
   3  -7   1   37.60    3.30
  -3  -7  -1   35.70    2.00
  -3  -7  -1   40.60    3.40
  -3  -7  -1   35.90    2.60
   3  -7   1   34.50    3.50
  -3  -7  -1   31.80    3.20
   3   7   1   32.40    2.60
  -3   7  -1   34.50    3.20
   3   7   1   32.70    3.00
  -3   7  -1   37.90    3.20
   3   7   1   35.20    3.40
   3   7   1   30.70    1.70
  -3   7  -1   34.50    2.40
   3   7   1   34.60    3.50
   3   7   1   35.70    2.80
  -3   7  -1   36.50    1.80
  -3   7  -1   36.00    2.70
  -3   7  -1   33.60    3.50
   3   7   1   35.40    3.40
  -4  -7  -1  466.85   18.30
   4  -7   1  442.76   16.50
  -4  -7  -1  463.15   16.00
   4  -7   1  480.35   17.40
  -4  -7  -1  435.06   17.30
  -4  -7  -1  475.95   16.80
   4  -7   1  455.25   17.40
   4  -7   1  453.65   17.60
   4  -7   1  452.45   18.70
   4  -7   1  444.36   17.60
  -4   7  -1  475.95   17.40
   4   7   1  433.66   17.40
   4   7   1  481.85   18.60
  -4   7  -1  457.45   17.60
   4   7   1  459.65   17.40
   4   7   1  435.96   16.70
  -4   7  -1  477.85   16.70
   4   7   1  473.05   17.30
  -4   7  -1  458.65   17.50
   4   7   1  445.66   17.00
   5  -7   1   -4.00    2.40
   5  -7   1   -0.60    2.40
   5  -7   1   -2.10    1.90
   5  -7   1   -0.20    2.50
  -5  -7  -1   -2.10    1.70
   5  -7   1   -1.00    1.90
   5  -7   1   -3.20    1.70
  -5  -7  -1    0.40    2.90
  -5  -7  -1    2.90    2.10
  -5   7  -1   -1.20    2.10
   5   7   1    1.80    2.60
  -5   7  -1    1.20    2.50
  -5   7  -1    0.30    1.90
  -5   7  -1    0.20    1.90
   5   7   1    0.40    2.10
   5   7   1    1.00    2.20
   5   7   1    0.70    3.20
   5   7   1   -1.80    2.30
   6  -7   1   28.50    4.80
   6  -7   1   37.10    5.10
  -6  -7  -1   30.30    4.10
  -6  -7  -1   35.20    5.40
   6  -7   1   31.50    5.60
  -6  -7  -1   27.90    5.00
   6  -7   1   28.50    4.50
   6  -7   1   21.70    4.70
  -6   7  -1   22.30    4.70
  -6   7  -1   32.30    4.70
   6   7   1   32.00    4.50
   6   7   1   26.90    4.70
   6   7   1   36.10    4.60
   6   7   1   34.90    5.50
  -6   7  -1   31.40    4.50
  -6   7  -1   25.90    4.90
   6   7   1   30.90    5.50
   7  -7   1    7.20    4.00
  -7  -7  -1    9.40    3.30
   7  -7   1    4.40    3.90
   7  -7   1    2.10    4.70
  -7  -7  -1    8.20    3.50
  -7  -7  -1    6.90    4.70
  -7   7  -1    6.90    4.60
   7   7   1    4.40    4.80
  -7   7  -1    6.30    3.50
   7   7   1    5.90    3.90
   7   7   1    2.30    3.40
  -7   7  -1    4.40    3.10
   8  -8  -1    9.00    4.60
   8  -8  -1   14.00    5.60
   8  -8  -1    2.50    4.20
  -8  -8   1    2.90    4.90
  -8  -8   1    4.40    3.80
  -8  -8   1   -3.40    2.80
   8   8  -1    4.90    5.50
   8   8  -1    4.90    4.20
  -8   8   1    1.40    4.00
  -8   8   1   25.90    6.00
   8   8  -1    3.50    3.70
  -8   8   1    3.40    3.90
   7  -8  -1   25.40    4.60
   7  -8  -1   23.00    4.80
   7  -8  -1   25.70    6.00
  -7  -8   1   25.40    4.40
  -7  -8   1   20.40    4.70
   7  -8  -1   24.00    4.80
  -7  -8   1   17.70    4.80
   7   8  -1   26.60    4.90
  -7   8   1   16.20    5.10
   7   8  -1   24.40    5.40
   7   8  -1   17.20    3.70
  -7   8   1   22.40    4.50
   7   8  -1   24.40    5.30
  -7   8   1   18.00    4.60
   6  -8  -1   11.70    3.30
   6  -8  -1   13.80    3.50
   6  -8  -1   13.00    4.60
   6  -8  -1   12.70    3.90
   6  -8  -1   12.70    3.40
   6  -8  -1   11.10    3.50
  -6  -8   1   10.20    4.00
  -6  -8   1   15.20    4.10
   6   8  -1   12.80    3.70
   6   8  -1   13.00    4.40
  -6   8   1    9.70    3.10
  -6   8   1    6.90    2.90
   6   8  -1   13.20    3.70
  -6   8   1    7.20    3.30
   6   8  -1   16.40    4.40
  -6   8   1    1.60    3.20
   5  -8  -1  108.49    6.70
   5  -8  -1  102.99    6.70
   5  -8  -1  110.69    6.80
   5  -8  -1  102.89    6.20
  -5  -8   1   97.49    6.50
  -5  -8   1  104.29    6.70
  -5  -8   1  112.59    5.70
   5  -8  -1   96.29    6.90
   5  -8  -1  107.19    6.50
   5  -8  -1   84.39    5.90
   5   8  -1   99.59    6.10
  -5   8   1  107.39    5.80
  -5   8   1  106.79    6.20
   5   8  -1   95.49    6.40
  -5   8   1   94.99    6.40
   5   8  -1  104.69    6.60
   5   8  -1  109.99    7.10
  -5   8   1   99.89    6.40
   5   8  -1  117.99    7.10
   5   8  -1   98.49    5.90
  -5   8   1  104.29    6.70
   4  -8  -1   15.40    2.60
  -4  -8   1   13.40    2.10
  -4  -8   1   10.10    2.30
   4  -8  -1   18.70    3.00
   4  -8  -1   12.80    2.40
   4  -8  -1   13.60    1.90
   4  -8  -1   15.60    3.00
   4  -8  -1   17.10    3.40
   4  -8  -1   16.00    3.00
   4  -8  -1   13.10    2.30
  -4  -8   1   15.60    3.00
   4  -8  -1   14.10    1.80
   4   8  -1   16.40    2.80
   4   8  -1   10.30    2.30
   4   8  -1   12.90    1.90
   4   8  -1   14.30    2.30
  -4   8   1   16.50    3.00
   4   8  -1   16.40    2.90
  -4   8   1   17.30    2.50
  -4   8   1   10.40    2.60
  -4   8   1   15.50    1.80
  -4   8   1   12.60    2.50
   4   8  -1   10.00    2.60
   4   8  -1   14.90    2.80
  -3  -8   1   69.29    4.20
  -3  -8   1   67.59    4.30
   3  -8  -1   63.49    3.60
  -3  -8   1   66.99    3.30
  -3  -8   1   63.89    2.80
   3  -8  -1   62.99    3.00
   3  -8  -1   64.99    4.00
   3  -8  -1   69.69    4.30
   3  -8  -1   61.99    3.90
   3  -8  -1   66.19    3.00
   3  -8  -1   60.99    4.20
   3  -8  -1   63.89    4.00
  -3   8   1   63.09    4.00
   3   8  -1   67.59    4.30
  -3   8   1   69.79    4.10
  -3   8   1   69.39    3.00
   3   8  -1   64.39    4.20
   3   8  -1   66.59    3.40
  -3   8   1   65.59    4.00
   3   8  -1   65.59    4.20
   3   8  -1   61.09    2.80
   3   8  -1   68.89    4.30
   3   8  -1   69.69    4.30
   3   8  -1   63.99    3.30
  -3   8   1   72.29    3.90
   2  -8  -1   45.10    3.10
   2  -8  -1   45.30    3.30
   2  -8  -1   43.30    3.00
  -2  -8   1   48.50    3.00
  -2  -8   1   40.50    2.00
   2  -8  -1   41.10    2.70
   2  -8  -1   40.60    3.10
   2  -8  -1   42.10    2.40
   2  -8  -1   39.10    2.00
  -2  -8   1   43.20    2.70
  -2  -8   1   40.90    2.60
  -2   8   1   39.60    3.00
  -2   8   1   41.50    2.80
  -2   8   1   44.50    3.10
   2   8  -1   41.60    3.10
   2   8  -1   41.30    2.30
   2   8  -1   38.90    2.20
  -2   8   1   46.20    2.10
   2   8  -1   39.10    2.70
  -2   8   1   47.50    3.00
   2   8  -1   42.50    2.80
   2   8  -1   48.70    3.10
   1  -8  -1   43.30    2.40
   1  -8  -1   43.00    2.40
   1  -8  -1   42.60    1.90
  -1  -8   1   37.40    1.70
  -1  -8   1   38.40    2.30
  -1  -8   1   40.40    2.40
  -1  -8   1   41.30    2.40
   1  -8  -1   43.10    2.50
  -1  -8   1   35.10    1.70
   1  -8  -1   38.80    2.40
   1   8  -1   42.20    1.70
   1   8  -1   39.00    2.10
  -1   8   1   40.80    2.50
   1   8  -1   43.10    2.60
  -1   8   1   42.30    2.40
   1   8  -1   43.90    2.60
  -1   8   1   41.80    1.90
   1   8  -1   37.50    2.40
  -1   8   1   42.90    2.40
   0  -8   1  220.68    7.50
   0  -8  -1  197.38    7.30
   0  -8  -1  207.98    7.40
   0  -8   1  218.58    7.80
   0  -8   1  210.88    7.30
   0  -8   1  190.88    7.30
   0  -8  -1  203.88    7.20
   0  -8   1  210.78    7.20
   0  -8  -1  212.98    7.80
   0  -8   1  203.28    7.30
   0   8  -1  202.98    7.30
   0   8   1  197.58    7.30
   0   8   1  210.68    7.40
   0   8   1  212.98    7.80
   0   8  -1  210.28    7.30
   0   8   1  194.18    7.20
   0   8  -1  217.98    7.30
   0   8   1  207.48    7.40
   0   8  -1  211.68    7.50
   0   8  -1  204.38    7.70
   0   8  -1  195.38    7.20
  -1  -8  -1 1066.39   35.20
  -1  -8  -1 1021.80   34.80
  -1  -8  -1 1088.59   34.20
   1  -8   1 1077.89   35.50
   1  -8   1 1066.49   34.20
  -1  -8  -1 1069.79   34.50
   1  -8   1 1079.09   34.80
   1  -8   1 1055.09   34.90
   1  -8   1 1054.99   34.90
   1  -8   1 1027.60   34.90
  -1   8  -1 1075.09   35.00
  -1   8  -1 1030.00   34.90
   1   8   1 1043.60   34.20
   1   8   1 1037.70   34.90
   1   8   1 1046.80   34.90
   1   8   1 1051.29   35.00
   1   8   1 1058.79   34.60
  -1   8  -1 1059.09   34.80
   1   8   1 1053.39   34.90
  -1   8  -1 1062.39   34.80
   2  -8   1  464.45   16.20
   2  -8   1  461.15   16.20
  -2  -8  -1  462.65   15.50
  -2  -8  -1  434.16   16.00
  -2  -8  -1  450.05   16.40
   2  -8   1  450.65   16.80
   2  -8   1  452.05   15.20
   2  -8   1  450.05   16.20
  -2  -8  -1  447.96   14.90
   2  -8   1  442.76   15.80
  -2   8  -1  456.25   16.10
   2   8   1  443.66   16.10
   2   8   1  446.66   16.10
   2   8   1  438.76   16.10
  -2   8  -1  442.56   16.10
   2   8   1  455.25   15.70
  -2   8  -1  461.75   15.50
  -2   8  -1  462.65   15.80
   2   8   1  450.35   15.90
   3  -8   1   15.30    1.90
   3  -8   1   13.10    2.50
   3  -8   1   15.50    2.70
  -3  -8  -1   19.00    2.80
  -3  -8  -1   17.60    1.40
   3  -8   1   22.40    3.00
   3  -8   1   16.40    1.10
  -3  -8  -1   18.50    3.10
  -3  -8  -1   20.70    2.20
   3  -8   1   20.10    2.60
   3  -8   1   22.00    3.20
  -3   8  -1   19.80    2.40
  -3   8  -1   18.90    2.70
  -3   8  -1   18.30    2.60
   3   8   1   16.80    2.60
  -3   8  -1   18.10    1.10
  -3   8  -1   18.40    2.80
   3   8   1   19.90    2.30
   3   8   1   22.40    3.00
   3   8   1   16.40    3.10
   3   8   1   18.40    2.30
  -3   8  -1   18.60    1.90
   3   8   1   17.20    1.20
   3   8   1   15.30    2.60
   4  -8   1   34.30    3.80
   4  -8   1   35.00    3.40
   4  -8   1   32.20    4.30
   4  -8   1   35.10    4.00
  -4  -8  -1   24.10    3.30
  -4  -8  -1   43.10    4.60
   4  -8   1   34.20    4.20
   4  -8   1   32.20    3.10
  -4  -8  -1   36.20    3.10
  -4   8  -1   37.70    4.10
   4   8   1   37.20    3.60
   4   8   1   36.80    3.40
  -4   8  -1   30.60    3.50
   4   8   1   32.00    3.70
   4   8   1   33.00    3.70
  -4   8  -1   35.20    3.20
   4   8   1   37.30    4.70
   4   8   1   35.80    4.00
  -4   8  -1   29.20    3.90
  -5  -8  -1   -4.80    2.60
   5  -8   1   -2.00    2.40
   5  -8   1    0.20    2.20
   5  -8   1   -1.40    3.30
  -5  -8  -1    1.80    1.60
   5  -8   1   -2.60    1.80
  -5  -8  -1    2.20    2.40
   5  -8   1   -1.10    2.10
   5   8   1   -3.30    2.20
   5   8   1   -4.60    2.70
   5   8   1    0.20    2.40
   5   8   1    0.70    2.10
   5   8   1    0.80    2.70
  -5   8  -1   -0.50    1.90
  -5   8  -1    3.00    2.10
  -5   8  -1   -4.10    1.60
  -5   8  -1   -1.50    2.10
   6  -8   1   10.20    4.00
  -6  -8  -1   11.10    4.10
   6  -8   1   14.70    3.80
   6  -8   1    1.20    3.40
  -6  -8  -1    8.50    3.00
  -6  -8  -1   13.10    4.60
   6  -8   1   15.50    4.50
   6  -8   1   12.20    3.90
   6   8   1   11.50    3.60
   6   8   1   17.20    4.20
  -6   8  -1    2.90    3.30
  -6   8  -1    8.30    4.00
   6   8   1   11.40    3.30
   6   8   1   19.60    4.80
  -6   8  -1   14.10    3.50
   6   8   1   12.00    4.90
   7  -8   1   -1.70    3.40
  -7  -8  -1    4.30    4.60
  -7  -8  -1    4.00    3.20
   7  -8   1   -0.60    4.60
   7  -8   1    4.00    4.00
  -7  -8  -1    0.00    3.00
   7   8   1   -2.10    3.30
  -7   8  -1    2.80    3.50
   7   8   1    3.60    5.00
  -7   8  -1    6.90    4.90
  -7   8  -1    2.10    3.70
   7   8   1   -0.50    3.00
  -8  -9   1    1.80    3.70
   8  -9  -1    1.80    4.00
   8  -9  -1    0.70    4.10
  -8  -9   1    1.50    4.50
  -8  -9   1    0.00    4.70
  -8   9   1   -2.50    3.40
  -8   9   1    6.80    4.20
   8   9  -1   -2.40    3.80
   8   9  -1   -5.20    4.40
  -8   9   1   10.70    5.40
   7  -9  -1    0.40    2.70
  -7  -9   1   10.70    3.90
   7  -9  -1   11.70    4.90
  -7  -9   1    3.90    4.50
   7  -9  -1    3.10    2.70
  -7  -9   1    3.90    4.00
   7   9  -1    0.20    3.90
  -7   9   1   -0.10    2.40
  -7   9   1    6.70    4.40
   7   9  -1   -1.20    3.30
   7   9  -1   11.10    5.20
  -7   9   1    5.20    3.10
   7   9  -1    8.80    4.00
   6  -9  -1   46.40    5.20
   6  -9  -1   45.20    5.70
   6  -9  -1   40.60    5.20
   6  -9  -1   49.10    6.80
  -6  -9   1   48.70    6.30
   6  -9  -1   67.69    5.90
  -6  -9   1   44.60    5.60
   6  -9  -1   46.30    5.20
  -6   9   1   48.90    5.60
  -6   9   1   50.89    4.90
   6   9  -1   64.79    7.10
   6   9  -1   53.79    6.20
   6   9  -1   46.90    5.50
   6   9  -1   39.50    4.90
  -6   9   1   63.09    6.10
  -6   9   1   47.50    5.30
   5  -9  -1   89.29    7.10
   5  -9  -1   83.99    6.30
  -5  -9   1   92.69    5.10
   5  -9  -1   88.09    6.20
   5  -9  -1   93.19    6.40
  -5  -9   1   85.59    6.20
   5  -9  -1   80.09    5.60
  -5  -9   1  105.89    6.90
   5  -9  -1   89.09    5.90
   5   9  -1   87.79    6.20
   5   9  -1   81.39    5.90
   5   9  -1   69.99    5.40
  -5   9   1   77.29    5.60
   5   9  -1  104.09    7.30
  -5   9   1   81.69    6.20
  -5   9   1   92.79    5.70
  -5   9   1   91.49    6.20
   5   9  -1  100.49    6.80
   5   9  -1   89.89    5.60
  -5   9   1   86.19    6.10
   4  -9  -1   94.59    6.40
   4  -9  -1   92.99    5.80
  -4  -9   1   90.39    4.50
   4  -9  -1   97.79    5.50
   4  -9  -1   89.19    4.40
  -4  -9   1   97.39    6.00
   4  -9  -1   88.49    5.10
   4  -9  -1   84.99    5.70
   4  -9  -1  101.39    5.30
  -4  -9   1   94.59    5.70
   4   9  -1   89.59    5.60
   4   9  -1   95.19    4.80
  -4   9   1   98.49    5.30
   4   9  -1   89.79    5.30
   4   9  -1  101.49    6.40
  -4   9   1   99.19    5.50
  -4   9   1   88.29    5.00
   4   9  -1   98.89    5.90
   4   9  -1   92.29    5.40
  -4   9   1   89.99    5.80
   4   9  -1   97.39    5.00
  -3  -9   1   83.69    4.90
  -3  -9   1   83.69    3.20
   3  -9  -1   82.49    5.20
   3  -9  -1   80.99    3.50
   3  -9  -1   79.49    4.80
   3  -9  -1   85.89    4.30
  -3  -9   1   85.99    3.80
   3  -9  -1   79.59    4.40
   3  -9  -1   81.79    4.90
   3  -9  -1   79.89    4.60
  -3  -9   1   84.19    4.50
  -3   9   1   84.19    4.50
  -3   9   1   82.49    4.90
   3   9  -1   84.59    3.30
   3   9  -1   79.69    4.80
   3   9  -1   81.79    3.90
   3   9  -1   84.99    4.70
   3   9  -1   82.39    4.60
  -3   9   1   89.49    4.50
  -3   9   1   81.69    3.50
   3   9  -1   80.29    3.80
  -3   9   1   81.19    4.60
   3   9  -1   88.59    4.90
   2  -9  -1  260.77    9.90
  -2  -9   1  258.17    9.90
  -2  -9   1  263.27    8.90
   2  -9  -1  258.07    9.30
  -2  -9   1  242.48    9.70
   2  -9  -1  257.17   10.00
   2  -9  -1  268.37   10.00
   2  -9  -1  255.07   10.20
   2  -9  -1  254.77    9.90
  -2  -9   1  262.47    9.80
  -2   9   1  255.27    9.80
  -2   9   1  266.77    9.90
  -2   9   1  253.07    9.90
   2   9  -1  257.77    9.00
   2   9  -1  253.37    9.90
   2   9  -1  256.77   10.20
  -2   9   1  254.77    9.90
   2   9  -1  272.27   10.00
   2   9  -1  251.87    9.20
   2   9  -1  252.07    9.90
  -2   9   1  271.47    8.90
  -1  -9   1    5.50    0.70
   1  -9  -1    5.80    1.10
   1  -9  -1    5.20    1.20
  -1  -9   1    5.60    0.70
  -1  -9   1    5.30    1.10
   1  -9  -1    4.20    1.10
  -1  -9   1    4.50    1.20
  -1  -9   1    2.70    0.90
   1  -9  -1    3.70    1.20
   1  -9  -1    3.90    0.80
   1   9  -1    6.60    0.70
  -1   9   1    3.90    1.30
   1   9  -1    6.90    1.60
   1   9  -1    7.00    1.40
   1   9  -1    4.10    1.20
  -1   9   1    3.50    1.00
  -1   9   1    3.90    0.90
  -1   9   1    5.70    1.30
   0  -9   1   10.60    1.20
   0  -9  -1   10.50    1.60
   0  -9   1   10.20    1.20
   0  -9  -1   10.90    1.20
   0  -9   1    9.40    1.50
   0  -9  -1   12.70    1.20
   0  -9  -1   10.70    1.20
   0  -9   1   12.30    1.40
   0  -9   1   12.10    1.20
   0  -9   1   11.70    1.20
   0   9   1   11.50    1.10
   0   9  -1    9.30    1.10
   0   9  -1   10.90    1.20
   0   9   1   10.30    1.30
   0   9   1   10.90    1.50
   0   9  -1   12.30    1.20
   0   9   1   11.20    1.40
   0   9   1    8.80    1.20
   0   9  -1   11.20    1.60
   0   9  -1   10.50    1.20
   1  -9   1  299.27   10.60
  -1  -9  -1  276.47   10.40
   1  -9   1  292.17   10.60
  -1  -9  -1  304.47    9.80
  -1  -9  -1  295.57   10.20
   1  -9   1  289.17   10.50
  -1  -9  -1  292.17   10.80
   1  -9   1  298.47   11.10
   1  -9   1  295.87    9.80
   1  -9   1  295.07   10.40
   1   9   1  290.27   10.60
  -1   9  -1  284.67   10.50
   1   9   1  301.27   10.20
  -1   9  -1  292.97   10.50
  -1   9  -1  284.17   10.60
   1   9   1  284.27   10.50
   1   9   1  281.77   10.70
   1   9   1  291.87   10.50
   1   9   1  289.47    9.90
  -1   9  -1  282.87   10.60
   2  -9   1  113.79    5.30
   2  -9   1  113.49    4.40
   2  -9   1  108.29    5.30
   2  -9   1  115.09    5.30
   2  -9   1  116.39    5.80
  -2  -9  -1  109.49    4.70
  -2  -9  -1  117.09    5.70
  -2  -9  -1  113.89    4.00
   2  -9   1  110.99    5.00
  -2  -9  -1  116.29    5.20
  -2   9  -1  117.49    4.90
  -2   9  -1  112.39    5.10
   2   9   1  109.69    5.20
  -2   9  -1  107.39    5.30
   2   9   1  107.89    5.20
  -2   9  -1  119.39    5.30
   2   9   1  112.89    4.10
   2   9   1  111.49    5.40
   2   9   1  112.49    4.90
   2   9   1  110.79    5.20
   3  -9   1    1.80    1.40
   3  -9   1    1.40    1.20
  -3  -9  -1    0.50    1.30
   3  -9   1   -0.50    1.90
  -3  -9  -1    1.00    0.70
  -3  -9  -1    0.90    1.20
   3  -9   1   -0.70    1.00
  -3  -9  -1   -2.00    1.90
   3  -9   1    1.50    1.90
   3  -9   1    2.80    2.10
  -3   9  -1    1.20    1.40
   3   9   1   -0.50    1.30
  -3   9  -1    1.30    1.20
   3   9   1    1.00    1.40
   3   9   1    0.90    1.40
  -3   9  -1    1.10    1.80
  -3   9  -1    0.20    1.40
   3   9   1   -1.00    2.10
  -3   9  -1   -1.90    1.80
   3   9   1    0.60    1.50
   3   9   1   -1.80    1.70
  -4  -9  -1   74.69    4.30
   4  -9   1   68.59    5.20
   4  -9   1   58.69    4.70
  -4  -9  -1   56.89    5.00
   4  -9   1   73.79    4.60
   4  -9   1   67.39    6.00
   4  -9   1   69.99    4.10
  -4  -9  -1   74.79    5.70
   4  -9   1   64.99    5.00
   4   9   1   65.29    5.10
  -4   9  -1   69.89    4.90
   4   9   1   68.49    4.50
   4   9   1   65.59    4.50
  -4   9  -1   58.89    4.80
  -4   9  -1   71.29    4.10
   4   9   1   68.69    4.50
   4   9   1   64.99    4.60
  -4   9  -1   71.99    5.10
   4   9   1   74.09    6.00
  -5  -9  -1   14.70    4.00
   5  -9   1   10.90    3.10
   5  -9   1    6.40    3.20
   5  -9   1   12.80    4.40
  -5  -9  -1    8.40    3.40
  -5  -9  -1   13.20    2.80
   5  -9   1   10.50    3.30
   5  -9   1   12.50    3.10
   5   9   1   13.70    3.50
   5   9   1   11.20    3.70
  -5   9  -1   11.60    2.80
   5   9   1   13.80    3.00
  -5   9  -1   12.70    3.50
   5   9   1    2.20    3.10
   5   9   1   11.80    4.10
  -5   9  -1    9.70    3.00
  -5   9  -1   11.00    2.90
   6  -9   1   12.10    4.30
   6  -9   1   19.20    5.40
   6  -9   1   11.50    4.20
   6  -9   1    8.10    3.00
  -6  -9  -1   11.40    3.10
   6  -9   1   14.90    4.10
  -6  -9  -1   14.50    4.60
  -6  -9  -1    3.00    3.60
   6   9   1   12.50    4.60
  -6   9  -1    9.60    3.90
  -6   9  -1    7.10    3.00
   6   9   1    6.50    3.70
  -6   9  -1   10.20    4.00
   6   9   1   16.80    5.20
   6   9   1   11.60    3.60
   6   9   1   10.70    3.80
  -7  -9  -1    8.40    3.60
   7  -9   1   16.40    5.90
  -7  -9  -1    5.00    4.70
   7  -9   1    9.60    4.60
   7  -9   1    4.50    3.90
  -7   9  -1    2.00    3.50
   7   9   1    2.30    3.30
   7   9   1   -3.90    3.40
  -7   9  -1   15.40    5.60
   7   9   1    4.10    5.00
  -7   9  -1    8.40    4.00
  -7 -10   1   31.10    5.00
   7 -10  -1   27.20    5.90
  -7 -10   1   23.80    5.20
   7 -10  -1   26.70    5.30
   7 -10  -1   18.30    4.00
  -7 -10   1   24.90    5.70
  -7  10   1   22.40    4.70
  -7  10   1   18.00    4.80
   7  10  -1   21.70    4.90
   7  10  -1   29.90    6.50
   7  10  -1   30.20    5.70
   7  10  -1   14.90    4.70
   6 -10  -1  165.28    9.60
   6 -10  -1  158.18   10.70
  -6 -10   1  171.48   10.20
   6 -10  -1  162.88    9.30
  -6 -10   1  137.79    8.20
   6 -10  -1  156.68    9.50
   6 -10  -1  163.88    8.90
  -6 -10   1  167.48    9.50
  -6  10   1  166.48    8.70
   6  10  -1  165.08    9.30
   6  10  -1  164.28    9.70
   6  10  -1  181.38   10.80
  -6  10   1  167.08    9.30
  -6  10   1  146.29    9.10
  -6  10   1  171.78    9.60
   6  10  -1  156.58    8.80
  -5 -10   1  173.38    9.20
  -5 -10   1  150.28    8.10
  -5 -10   1  157.98    7.30
   5 -10  -1  164.98    8.60
   5 -10  -1  150.58    8.00
   5 -10  -1  147.19    9.40
   5 -10  -1  157.78    8.10
   5 -10  -1  148.69    8.20
   5 -10  -1  145.79    8.10
  -5  10   1  161.28    8.50
   5  10  -1  144.29    8.70
  -5  10   1  150.68    8.40
   5  10  -1  183.58    9.80
  -5  10   1  158.98    8.10
  -5  10   1  148.59    8.10
   5  10  -1  163.98    8.60
   5  10  -1  156.88    8.30
  -5  10   1  173.88    8.80
   5  10  -1  140.49    7.90
  -4 -10   1   13.70    2.90
   4 -10  -1    4.70    2.50
  -4 -10   1    9.00    2.30
   4 -10  -1   11.80    3.10
   4 -10  -1   10.90    2.90
  -4 -10   1   11.60    1.80
   4 -10  -1    9.60    2.30
   4 -10  -1   11.10    2.30
   4 -10  -1    7.90    2.10
   4  10  -1   14.20    2.80
   4  10  -1   10.40    2.00
   4  10  -1   10.40    2.40
   4  10  -1   12.60    2.90
  -4  10   1   12.60    2.50
  -4  10   1   17.00    2.60
   4  10  -1   12.90    2.90
  -4  10   1    7.60    2.80
  -4  10   1   13.30    2.40
   3 -10  -1  325.17   12.70
  -3 -10   1  338.07   13.00
   3 -10  -1  309.47   13.40
   3 -10  -1  325.07   12.90
   3 -10  -1  325.37   11.40
  -3 -10   1  336.57   11.70
   3 -10  -1  325.77   13.00
  -3 -10   1  342.27   12.80
   3 -10  -1  332.77   12.30
   3 -10  -1  346.97   13.00
  -3  10   1  332.77   11.40
   3  10  -1  327.07   12.80
   3  10  -1  331.67   11.90
  -3  10   1  357.16   12.70
   3  10  -1  321.87   11.80
   3  10  -1  318.87   12.90
  -3  10   1  345.67   13.00
   3  10  -1  350.56   13.00
   3  10  -1  334.07   13.10
  -3  10   1  319.97   12.90
  -3  10   1  346.87   12.80
   2 -10  -1   46.60    3.50
   2 -10  -1   43.20    2.90
  -2 -10   1   45.40    2.10
  -2 -10   1   38.40    3.00
   2 -10  -1   48.30    3.00
   2 -10  -1   44.80    3.30
   2 -10  -1   40.10    3.10
  -2 -10   1   43.50    2.80
   2 -10  -1   43.50    2.50
  -2 -10   1   43.60    2.90
   2  10  -1   44.00    2.30
   2  10  -1   39.80    2.90
   2  10  -1   43.40    3.10
  -2  10   1   44.90    2.10
  -2  10   1   42.60    3.00
  -2  10   1   46.50    3.30
   2  10  -1   43.30    2.40
   2  10  -1   47.20    3.00
  -2  10   1   46.70    3.00
   2  10  -1   38.80    3.30
  -2  10   1   41.40    2.90
  -1 -10   1  144.69    6.00
   1 -10  -1  159.48    6.60
  -1 -10   1  159.18    5.50
  -1 -10   1  151.08    6.20
   1 -10  -1  159.88    6.20
   1 -10  -1  156.18    5.60
   1 -10  -1  156.68    6.20
   1 -10  -1  152.08    6.20
  -1 -10   1  150.18    6.00
   1  10  -1  156.08    5.40
  -1  10   1  155.78    5.60
  -1  10   1  148.09    6.30
   1  10  -1  152.98    6.60
   1  10  -1  141.79    6.00
   1  10  -1  148.89    5.80
  -1  10   1  149.69    6.10
   1  10  -1  158.98    6.20
  -1  10   1  152.88    6.10
   0 -10   1    7.00    1.20
   0 -10   1    6.70    1.40
   0 -10   1    6.40    0.90
   0 -10   1    4.60    1.00
   0 -10  -1    6.50    1.20
   0 -10  -1    5.60    1.00
   0 -10   1    5.50    1.00
   0 -10  -1    5.60    1.00
   0 -10  -1    5.60    1.40
   0  10  -1    5.70    1.00
   0  10  -1    6.50    1.00
   0  10   1    5.10    0.90
   0  10   1    7.00    1.20
   0  10   1    5.60    1.20
   0  10  -1    7.70    1.30
   0  10   1    4.50    0.90
   0  10  -1    6.60    1.20
   0  10  -1    6.20    1.20
   0  10  -1    4.80    0.90
   0  10   1    4.90    1.10
   1 -10   1  362.36   13.20
   1 -10   1  377.36   13.80
   1 -10   1  371.26   13.00
  -1 -10  -1  383.76   12.80
   1 -10   1  388.46   12.40
  -1 -10  -1  372.06   13.50
   1 -10   1  385.16   13.30
   1 -10   1  384.36   13.30
  -1 -10  -1  380.36   12.40
  -1 -10  -1  347.67   13.00
   1  10   1  365.26   12.50
   1  10   1  374.16   13.20
  -1  10  -1  380.86   13.20
   1  10   1  368.66   13.10
   1  10   1  370.76   13.30
   1  10   1  380.16   12.90
  -1  10  -1  365.96   13.20
  -1  10  -1  359.06   13.10
  -1  10  -1  360.96   13.20
  -1  10  -1  372.96   12.40
   1  10   1  374.76   13.50
  -2 -10  -1    3.90    0.60
  -2 -10  -1    3.80    1.60
  -2 -10  -1    3.40    1.10
   2 -10   1    2.60    0.80
   2 -10   1    0.40    1.20
   2 -10   1    2.60    1.20
   2 -10   1    1.00    1.70
   2 -10   1    1.90    1.30
  -2 -10  -1    2.20    1.30
   2 -10   1    1.90    1.30
   2  10   1   -1.30    1.60
  -2  10  -1    3.50    1.20
   2  10   1    2.60    1.10
  -2  10  -1    3.20    1.50
   2  10   1    3.40    1.80
  -2  10  -1    0.20    1.10
   2  10   1    1.30    0.70
  -2  10  -1    2.80    1.40
   2  10   1    0.80    1.40
   2  10   1    0.70    1.60
   3 -10   1  160.38    7.70
   3 -10   1  157.18    6.40
  -3 -10  -1  160.48    5.90
   3 -10   1  163.18    7.50
   3 -10   1  157.48    7.70
   3 -10   1  167.68    7.40
  -3 -10  -1  174.58    6.80
  -3 -10  -1  175.18    8.20
   3 -10   1  159.98    8.40
  -3 -10  -1  162.08    7.40
   3  10   1  168.18    7.70
   3  10   1  167.08    7.50
  -3  10  -1  169.08    7.10
  -3  10  -1  155.68    7.70
   3  10   1  170.78    7.10
  -3  10  -1  175.48    6.80
   3  10   1  161.88    7.50
   3  10   1  161.68    7.40
  -3  10  -1  172.68    7.60
   4 -10   1   86.29    5.60
   4 -10   1   90.49    6.00
   4 -10   1   90.99    6.20
  -4 -10  -1   96.99    5.00
   4 -10   1   86.69    6.30
  -4 -10  -1   90.99    5.60
   4 -10   1  100.29    6.00
   4 -10   1   82.19    4.50
  -4 -10  -1   95.19    6.50
   4  10   1   91.69    5.70
   4  10   1   98.39    6.40
   4  10   1   85.29    5.70
  -4  10  -1   89.99    6.20
   4  10   1   87.99    5.50
  -4  10  -1   87.09    5.80
  -4  10  -1   98.39    5.30
   4  10   1   83.69    5.40
   4  10   1   88.69    5.20
  -4  10  -1   98.69    6.00
   5 -10   1   37.20    5.00
   5 -10   1   35.50    5.80
  -5 -10  -1   34.60    3.80
   5 -10   1   45.40    5.00
   5 -10   1   39.20    4.90
  -5 -10  -1   43.60    5.60
  -5 -10  -1   41.00    4.70
   5 -10   1   36.60    4.70
   5  10   1   43.00    5.90
  -5  10  -1   35.00    4.70
   5  10   1   37.00    4.40
  -5  10  -1   39.10    4.80
  -5  10  -1   44.20    4.80
   5  10   1   38.50    4.80
   5  10   1   34.80    4.40
  -5  10  -1   43.10    4.00
   5  10   1   38.00    4.60
   6 -10   1   28.90    5.20
   6 -10   1   30.00    5.30
  -6 -10  -1   30.40    5.10
   6 -10   1   31.40    4.90
   6 -10   1   33.40    5.20
   6 -10   1   39.00    6.40
  -6 -10  -1   28.00    4.00
  -6 -10  -1   33.30    5.80
   6  10   1   25.30    5.10
   6  10   1   36.80    6.30
  -6  10  -1   25.80    4.50
  -6  10  -1   27.40    5.00
  -6  10  -1   21.40    4.00
   6  10   1   27.10    4.70
  -6  10  -1   31.60    5.20
   6  10   1   22.90    4.20
   7 -10   1   39.00    5.70
  -7 -10  -1   50.09    7.70
  -7 -10  -1   43.90    6.10
   7 -10   1   49.30    8.40
   7 -10   1   51.09    6.40
   7  10   1   47.70    7.90
  -7  10  -1   46.60    5.90
   7  10   1   46.00    6.10
   7  10   1   52.39    6.90
  -7  10  -1   51.59    8.20
  -7  10  -1   44.30    5.90
   7  10   1   32.90    5.70
  -7 -11   1   39.90    6.00
  -7 -11   1   31.50    5.50
   7 -11  -1   33.20    5.40
  -7 -11   1   42.50    5.20
   7 -11  -1   42.90    7.10
   7 -11  -1   31.20    5.80
   7  11  -1   28.70    4.80
   7  11  -1   27.90    5.40
  -7  11   1   34.70    5.70
   7  11  -1   41.90    6.20
  -7  11   1   29.00    5.30
   6 -11  -1  115.09    8.10
  -6 -11   1  130.69    8.90
   6 -11  -1  121.49    8.00
  -6 -11   1   99.49    7.20
   6 -11  -1  123.79    8.30
   6 -11  -1  123.39    9.40
  -6 -11   1  121.09    7.70
   6 -11  -1  113.09    7.40
  -6  11   1  113.69    7.90
   6  11  -1  108.19    7.20
   6  11  -1  112.99    7.60
  -6  11   1  109.59    7.90
   6  11  -1  133.49    8.30
  -6  11   1  122.19    7.90
  -6  11   1  113.49    7.20
   5 -11  -1   91.59    7.00
   5 -11  -1   92.39    6.20
  -5 -11   1  108.89    7.30
   5 -11  -1   85.79    6.50
   5 -11  -1   93.19    6.30
   5 -11  -1   95.09    6.30
  -5 -11   1  109.49    6.40
   5 -11  -1   93.69    6.10
  -5  11   1  100.49    6.30
  -5  11   1   95.49    6.10
  -5  11   1   93.79    6.20
  -5  11   1  105.69    7.00
   5  11  -1   92.89    6.20
   5  11  -1   91.79    6.50
   5  11  -1  103.49    6.50
  -5  11   1  104.79    6.80
   5  11  -1  108.49    6.90
   4 -11  -1  371.96   14.30
  -4 -11   1  375.76   13.30
   4 -11  -1  371.36   14.10
   4 -11  -1  361.46   15.50
   4 -11  -1  369.16   14.60
   4 -11  -1  340.37   14.50
   4 -11  -1  383.86   14.90
  -4 -11   1  364.96   14.40
  -4 -11   1  370.66   15.00
  -4  11   1  380.56   14.20
   4  11  -1  355.26   14.50
   4  11  -1  369.16   14.60
   4  11  -1  370.36   13.60
  -4  11   1  376.06   14.40
  -4  11   1  356.16   14.50
   4  11  -1  375.56   14.90
  -4  11   1  390.56   14.90
   4  11  -1  334.97   14.40
   3 -11  -1    1.50    1.00
  -3 -11   1    2.50    1.50
   3 -11  -1    2.00    1.30
   3 -11  -1    0.00    1.20
   3 -11  -1    0.50    1.90
  -3 -11   1    0.60    1.30
  -3 -11   1    1.50    1.10
   3 -11  -1   -0.30    1.70
   3 -11  -1    3.60    2.00
   3 -11  -1    2.90    2.00
  -3  11   1    3.00    1.00
  -3  11   1   -2.00    1.80
   3  11  -1    2.50    1.50
   3  11  -1    1.30    1.10
  -3  11   1    1.90    1.80
   3  11  -1    1.30    1.80
  -3  11   1    2.40    1.60
  -3  11   1    2.80    1.80
   3  11  -1    1.90    1.20
   3  11  -1    1.50    1.50
   3  11  -1    2.80    2.00
  -2 -11   1  167.98    7.10
   2 -11  -1  167.48    7.60
  -2 -11   1  164.58    7.00
   2 -11  -1  172.58    7.20
   2 -11  -1  167.18    7.30
  -2 -11   1  175.78    6.20
   2 -11  -1  175.38    6.70
   2 -11  -1  172.98    7.20
  -2 -11   1  177.28    7.40
   2 -11  -1  168.88    7.30
  -2  11   1  163.78    7.20
   2  11  -1  191.48    7.40
   2  11  -1  176.78    7.70
   2  11  -1  173.38    7.20
  -2  11   1  175.28    7.30
   2  11  -1  169.68    6.30
   2  11  -1  167.48    6.50
  -2  11   1  169.88    7.20
  -2  11   1  171.58    7.20
   2  11  -1  163.68    7.20
  -2  11   1  172.98    6.20
  -1 -11   1   58.39    3.10
   1 -11  -1   62.89    2.80
  -1 -11   1   60.09    3.20
  -1 -11   1   60.99    3.40
   1 -11  -1   60.39    3.20
   1 -11  -1   60.49    3.60
   1 -11  -1   57.29    3.30
  -1 -11   1   61.09    2.60
   1  11  -1   61.29    2.60
  -1  11   1   58.19    3.50
   1  11  -1   65.79    3.80
   1  11  -1   64.19    2.40
   1  11  -1   61.09    3.10
   1  11  -1   63.19    3.00
  -1  11   1   58.69    2.80
  -1  11   1   61.09    3.30
  -1  11   1   58.59    3.30
   1  11  -1   65.89    3.50
   0 -11  -1   57.79    2.70
   0 -11  -1   54.39    3.20
   0 -11   1   51.69    2.50
   0 -11   1   54.59    3.20
   0 -11   1   57.59    2.90
   0 -11  -1   56.89    2.80
   0 -11   1   53.89    2.70
   0 -11   1   59.19    2.80
   0 -11  -1   54.79    2.80
   0  11  -1   54.49    2.70
   0  11   1   56.09    2.80
   0  11   1   53.49    2.60
   0  11  -1   51.29    2.60
   0  11   1   54.69    3.10
   0  11  -1   54.89    3.10
   0  11   1   54.89    2.80
   0  11  -1   54.09    2.70
   0  11   1   55.89    2.80
   0  11  -1   53.59    2.90
   0  11  -1   58.29    2.60
  -1 -11  -1  158.48    5.60
  -1 -11  -1  157.88    6.70
   1 -11   1  161.48    7.00
   1 -11   1  152.08    6.10
  -1 -11  -1  147.09    6.10
   1 -11   1  157.78    6.40
   1 -11   1  159.08    6.40
   1 -11   1  163.48    5.60
   1 -11   1  160.38    6.50
  -1 -11  -1  167.28    6.00
  -1  11  -1  154.78    6.40
   1  11   1  157.28    6.00
   1  11   1  160.68    6.70
   1  11   1  153.78    6.50
  -1  11  -1  159.88    5.60
   1  11   1  151.58    6.30
  -1  11  -1  156.18    6.40
   1  11   1  153.68    5.70
  -1  11  -1  155.88    6.40
   1  11   1  157.08    6.30
  -1  11  -1  144.99    6.40
   2 -11   1   45.00    2.20
   2 -11   1   46.60    3.20
  -2 -11  -1   48.20    2.60
   2 -11   1   44.70    2.90
   2 -11   1   45.40    3.50
  -2 -11  -1   42.90    3.30
   2 -11   1   46.10    3.50
   2 -11   1   36.90    3.00
  -2 -11  -1   50.69    3.40
   2  11   1   43.90    3.30
   2  11   1   41.90    3.40
   2  11   1   39.60    3.40
  -2  11  -1   43.60    2.90
   2  11   1   47.40    2.70
  -2  11  -1   47.10    2.90
   2  11   1   46.70    3.40
  -2  11  -1   43.50    3.10
   2  11   1   41.60    2.00
  -2  11  -1   43.90    3.50
  -3 -11  -1   34.00    3.10
   3 -11   1   34.90    2.40
   3 -11   1   34.60    3.20
   3 -11   1   38.50    3.70
   3 -11   1   37.20    2.90
  -3 -11  -1   43.30    4.00
   3 -11   1   44.30    3.90
  -3 -11  -1   41.50    2.80
   3 -11   1   40.00    4.20
   3  11   1   37.90    3.60
   3  11   1   41.40    3.30
  -3  11  -1   40.10    3.30
   3  11   1   39.90    3.90
   3  11   1   41.30    3.10
   3  11   1   39.00    3.30
  -3  11  -1   40.10    2.90
  -3  11  -1   38.60    2.90
  -3  11  -1   40.00    4.00
   4 -11   1  194.68   10.40
  -4 -11  -1  195.38    8.10
   4 -11   1  186.88    9.30
   4 -11   1  186.48    8.90
   4 -11   1  190.68    9.20
  -4 -11  -1  192.28    9.30
   4 -11   1  198.88    9.60
  -4 -11  -1  197.38    9.60
   4  11   1  189.68    8.50
  -4  11  -1  192.78    9.50
  -4  11  -1  185.58    9.20
   4  11   1  198.78    9.30
   4  11   1  196.78    9.50
  -4  11  -1  193.58    9.20
   4  11   1  185.38    8.70
  -4  11  -1  198.68    8.60
   4  11   1  186.88    9.10
  -5 -11  -1   74.19    6.60
   5 -11   1   57.59    5.40
   5 -11   1   54.79    5.10
  -5 -11  -1   53.29    5.00
  -5 -11  -1   68.79    4.70
   5 -11   1   61.09    5.90
   5 -11   1   63.19    5.70
   5 -11   1   56.69    6.00
  -5  11  -1   63.59    5.70
  -5  11  -1   60.59    4.40
   5  11   1   63.29    6.10
   5  11   1   79.99    7.10
   5  11   1   55.29    4.70
   5  11   1   54.19    5.20
   5  11   1   57.69    5.50
  -5  11  -1   57.89    5.20
  -5  11  -1   56.69    5.80
  -6 -11  -1   35.40    5.10
  -6 -11  -1   40.80    4.50
  -6 -11  -1   37.90    6.20
   6 -11   1   43.20    7.00
   6 -11   1   46.40    5.70
   6 -11   1   44.80    5.70
   6 -11   1   43.70    5.80
   6 -11   1   42.30    5.80
   6  11   1   46.80    5.90
  -6  11  -1   46.30    4.90
   6  11   1   42.80    5.70
  -6  11  -1   48.70    5.70
   6  11   1   52.49    6.00
   6  11   1   52.49    7.30
  -6  11  -1   43.60    5.60
  -6  11  -1   40.80    5.90
   7 -11   1    6.00    4.40
  -7 -11  -1    2.50    4.40
  -7 -11  -1    4.50    3.50
   7 -11   1    5.70    3.90
   7 -11   1    8.20    5.20
   7  11   1    0.60    3.20
   7  11   1    0.10    2.90
  -7  11  -1    4.10    3.70
   7  11   1    3.50    3.60
  -7  11  -1    5.60    4.10
   7 -12  -1   50.89    8.00
  -7 -12   1   78.99    6.90
   7 -12  -1   66.99    7.30
   7 -12  -1   62.39    7.00
  -7 -12   1   75.49    7.80
  -7 -12   1   70.09    7.90
   7  12  -1   74.79    7.10
  -7  12   1   67.79    6.80
  -7  12   1   74.79    8.50
   7  12  -1   71.89    7.50
   7  12  -1   76.99    8.20
  -7  12   1   61.79    6.10
   6 -12  -1   12.70    3.90
   6 -12  -1    4.50    2.80
   6 -12  -1   13.30    3.90
   6 -12  -1    8.20    3.60
  -6 -12   1    6.50    2.80
  -6 -12   1   11.90    4.20
  -6 -12   1    9.50    3.30
   6 -12  -1   11.70    3.40
   6  12  -1   16.70    4.20
  -6  12   1    7.80    3.00
  -6  12   1    6.70    3.30
  -6  12   1   11.40    3.90
   6  12  -1    6.10    2.80
  -6  12   1    8.60    3.50
   6  12  -1    8.20    3.30
   5 -12  -1   42.60    5.90
   5 -12  -1   41.70    5.00
  -5 -12   1   40.20    4.30
  -5 -12   1   36.80    4.40
   5 -12  -1   38.40    4.30
   5 -12  -1   36.90    4.50
   5 -12  -1   39.90    5.20
  -5 -12   1   43.10    4.60
   5  12  -1   47.30    4.60
  -5  12   1   42.00    4.70
   5  12  -1   36.90    4.40
  -5  12   1   50.49    7.10
  -5  12   1   33.60    4.40
   5  12  -1   34.50    4.70
  -5  12   1   34.60    4.70
   5  12  -1   38.30    5.00
   4 -12  -1    3.50    2.70
  -4 -12   1    5.90    2.10
   4 -12  -1    1.50    1.70
  -4 -12   1    3.30    1.40
   4 -12  -1    3.70    2.50
   4 -12  -1    4.50    2.60
   4 -12  -1    3.80    2.50
   4 -12  -1    1.40    2.30
  -4 -12   1    3.70    2.50
   4  12  -1    4.20    1.70
   4  12  -1    6.30    2.50
  -4  12   1    2.20    2.30
   4  12  -1    2.60    2.50
   4  12  -1    6.30    2.70
   4  12  -1    1.20    2.60
  -4  12   1    3.40    2.50
  -4  12   1    4.00    2.70
  -4  12   1    5.10    2.10
  -3 -12   1    8.80    1.30
  -3 -12   1    8.90    2.30
  -3 -12   1    6.50    2.20
   3 -12  -1   10.60    2.20
   3 -12  -1    9.30    2.10
  -3 -12   1   10.40    2.40
   3 -12  -1   10.00    1.80
   3 -12  -1    7.40    2.20
   3 -12  -1    9.10    2.30
   3 -12  -1    7.00    2.00
  -3  12   1    8.40    2.10
   3  12  -1    8.80    2.10
  -3  12   1   11.70    2.30
   3  12  -1    8.70    2.10
   3  12  -1    4.90    2.40
   3  12  -1    7.60    1.50
  -3  12   1    6.20    1.90
   3  12  -1    9.80    1.50
   3  12  -1    9.20    2.50
  -3  12   1    9.50    2.10
  -3  12   1   11.00    1.20
  -2 -12   1    5.10    1.30
   2 -12  -1    4.40    1.60
   2 -12  -1    4.80    1.70
   2 -12  -1    2.60    1.80
  -2 -12   1    3.90    0.90
  -2 -12   1    2.10    1.50
   2 -12  -1    7.00    1.70
  -2 -12   1    4.30    1.70
   2 -12  -1    5.20    1.30
   2 -12  -1    2.10    1.70
   2  12  -1    4.30    0.90
   2  12  -1    5.50    1.50
  -2  12   1    1.90    1.80
   2  12  -1    4.60    1.20
  -2  12   1    3.70    1.80
   2  12  -1    2.80    1.90
  -2  12   1    4.40    1.50
   2  12  -1    3.70    1.80
   2  12  -1    0.40    1.70
  -2  12   1    6.20    1.80
  -2  12   1    4.60    1.00
   1 -12  -1  132.69    5.70
   1 -12  -1  133.59    6.10
  -1 -12   1  128.79    5.50
  -1 -12   1  136.29    5.80
  -1 -12   1  131.69    5.00
  -1 -12   1  125.89    5.40
   1 -12  -1  132.39    5.70
   1 -12  -1  139.09    5.10
  -1  12   1  132.69    5.80
  -1  12   1  135.09    5.10
   1  12  -1  132.29    5.30
   1  12  -1  134.59    4.90
   1  12  -1  133.09    5.50
   1  12  -1  133.59    5.80
  -1  12   1  129.19    5.70
  -1  12   1  130.29    5.60
  -1  12   1  121.89    5.60
   1  12  -1  132.89    4.70
   1  12  -1  129.49    6.00
   0 -12   1   17.70    1.70
   0 -12   1   17.20    1.50
   0 -12  -1   17.10    1.70
   0 -12   1   16.90    1.50
   0 -12  -1   15.90    1.70
   0 -12   1   16.20    1.60
   0 -12  -1   19.50    2.10
   0 -12  -1   15.30    1.50
   0 -12   1   15.70    2.10
   0  12   1   18.00    2.10
   0  12  -1   15.20    1.40
   0  12   1   19.10    1.70
   0  12   1   14.80    1.40
   0  12   1   16.80    1.80
   0  12  -1   17.70    1.80
   0  12  -1   19.10    1.50
   0  12   1   16.00    1.60
   0  12  -1   16.70    1.70
   0  12  -1   20.20    2.00
   0  12  -1   18.80    1.60
  -1 -12  -1   90.39    3.80
   1 -12   1   86.79    4.20
   1 -12   1   83.39    4.20
  -1 -12  -1   85.49    3.40
   1 -12   1   84.99    4.60
  -1 -12  -1   85.89    4.40
   1 -12   1   90.39    3.30
   1 -12   1   86.29    4.20
  -1 -12  -1   82.69    3.90
   1 -12   1   88.49    3.90
  -1  12  -1   82.89    4.10
   1  12   1   84.49    3.60
   1  12   1   85.79    4.20
   1  12   1   84.19    4.00
   1  12   1   82.49    4.50
  -1  12  -1   85.69    4.30
  -1  12  -1   80.09    4.20
  -1  12  -1   81.89    4.20
   1  12   1   87.49    4.10
  -1  12  -1   86.09    3.40
   1  12   1   87.69    3.80
  -2 -12  -1    4.00    1.60
   2 -12   1    6.20    1.50
   2 -12   1    6.00    0.90
   2 -12   1    7.80    2.30
   2 -12   1    2.20    1.90
   2 -12   1    2.40    1.50
  -2 -12  -1    5.70    1.20
  -2 -12  -1    4.90    1.80
   2 -12   1    2.00    1.30
   2  12   1    4.20    1.90
  -2  12  -1    3.90    1.50
   2  12   1    1.80    1.60
  -2  12  -1    2.10    1.80
   2  12   1    5.00    1.30
  -2  12  -1    3.80    1.60
  -2  12  -1    4.00    1.80
   2  12   1    1.70    1.90
   2  12   1    4.90    1.90
   2  12   1    4.10    0.90
  -3 -12  -1   46.90    3.90
   3 -12   1   41.40    2.50
  -3 -12  -1   42.10    4.10
   3 -12   1   39.60    3.40
   3 -12   1   44.70    4.00
   3 -12   1   46.10    3.50
  -3 -12  -1   46.50    3.00
   3 -12   1   39.50    3.90
   3 -12   1   42.80    3.90
   3  12   1   44.00    3.80
  -3  12  -1   46.90    3.20
   3  12   1   41.80    3.80
  -3  12  -1   37.80    3.40
  -3  12  -1   41.10    3.40
   3  12   1   42.60    3.90
   3  12   1   45.80    3.10
   3  12   1   47.40    3.60
  -3  12  -1   43.40    4.00
  -4 -12  -1   18.80    3.10
   4 -12   1   17.20    3.60
  -4 -12  -1   21.80    3.90
   4 -12   1   19.40    4.20
   4 -12   1   17.70    3.30
  -4 -12  -1   18.70    2.60
   4 -12   1   18.50    3.10
   4 -12   1   16.50    3.50
  -4  12  -1   21.40    3.80
   4  12   1   16.80    3.00
   4  12   1   22.40    3.00
  -4  12  -1   11.10    3.30
  -4  12  -1   16.90    2.70
  -4  12  -1   21.60    3.30
   4  12   1   20.30    3.30
   4  12   1   15.40    3.00
   4  12   1   17.10    3.60
  -5 -12  -1    4.30    3.30
   5 -12   1    3.90    2.60
   5 -12   1    4.10    2.90
   5 -12   1    3.70    3.40
   5 -12   1    5.60    3.40
  -5 -12  -1    8.90    3.70
   5 -12   1    3.90    2.80
  -5 -12  -1    2.10    2.20
   5  12   1    4.10    2.50
  -5  12  -1    2.90    3.10
  -5  12  -1    1.60    2.70
   5  12   1    1.20    3.40
   5  12   1    3.20    2.40
  -5  12  -1    0.60    2.50
   5  12   1    4.30    3.20
  -5  12  -1    0.80    3.20
   6 -12   1    3.30    3.80
   6 -12   1   13.90    5.00
  -6 -12  -1   17.00    4.20
  -6 -12  -1   12.00    3.20
   6 -12   1   15.30    3.50
  -6 -12  -1   15.50    3.90
   6 -12   1   10.20    3.40
   6 -12   1   15.20    4.50
  -6  12  -1   14.70    4.20
  -6  12  -1   14.00    3.50
   6  12   1    8.90    3.90
   6  12   1   11.20    3.70
   6  12   1   11.70    3.60
  -6  12  -1   14.60    4.40
  -6  12  -1   13.60    3.70
  -7 -12  -1    9.10    5.10
  -7 -12  -1    5.40    3.60
   7 -12   1    7.10    4.00
   7 -12   1    2.00    4.40
   7 -12   1    5.20    4.20
   7  12   1    4.00    4.30
   7  12   1    3.70    3.70
   7  12   1   -1.60    3.20
  -7  12  -1    0.90    3.90
  -7  12  -1   -0.60    2.70
   7 -13  -1   14.00    4.60
  -7 -13   1   24.30    4.80
   7 -13  -1    7.70    4.80
   7 -13  -1   24.40    6.10
  -7 -13   1   16.80    4.70
  -7 -13   1   22.70    5.50
   7  13  -1   19.40    4.80
  -7  13   1   14.40    4.00
  -7  13   1    7.30    4.40
   7  13  -1    8.10    4.30
  -7  13   1   15.10    4.50
   7  13  -1   19.90    5.40
   6 -13  -1   50.59    6.80
   6 -13  -1   49.90    6.00
   6 -13  -1   50.69    5.70
   6 -13  -1   52.39    6.40
  -6 -13   1   40.80    5.30
  -6 -13   1   59.59    6.80
  -6 -13   1   70.89    6.10
   6  13  -1   53.69    6.00
  -6  13   1   52.39    6.10
   6  13  -1   55.29    6.20
  -6  13   1   46.10    4.50
  -6  13   1   57.79    6.20
   6  13  -1   44.40    5.50
  -6  13   1   50.49    5.70
  -5 -13   1   52.69    5.30
   5 -13  -1   48.50    6.40
   5 -13  -1   50.29    5.50
   5 -13  -1   52.79    4.60
  -5 -13   1   61.69    5.60
   5 -13  -1   54.09    4.80
   5 -13  -1   54.39    4.90
  -5 -13   1   62.09    5.90
   5  13  -1   56.49    5.60
   5  13  -1   41.50    4.40
  -5  13   1   57.49    5.00
  -5  13   1   51.09    4.80
   5  13  -1   53.29    5.70
  -5  13   1   46.90    5.40
   5  13  -1   48.20    5.50
   4 -13  -1   83.99    5.10
   4 -13  -1   94.09    6.00
   4 -13  -1   87.49    6.60
  -4 -13   1   78.99    5.10
  -4 -13   1   94.79    6.10
  -4 -13   1   82.19    5.30
  -4 -13   1   91.29    4.40
   4 -13  -1   81.99    5.80
   4 -13  -1   84.19    6.00
   4  13  -1   91.09    5.60
  -4  13   1   95.79    5.40
  -4  13   1   89.49    5.60
   4  13  -1   90.09    6.00
  -4  13   1   93.49    6.10
   4  13  -1   86.09    5.50
   4  13  -1   84.29    5.60
  -4  13   1   85.79    5.90
   3 -13  -1   86.59    5.30
   3 -13  -1   92.49    4.70
   3 -13  -1   88.29    5.00
  -3 -13   1   80.09    4.80
   3 -13  -1   86.69    5.40
  -3 -13   1   95.09    4.00
  -3 -13   1   91.89    5.20
   3 -13  -1   86.49    5.90
  -3 -13   1   93.19    5.00
   3 -13  -1   88.59    5.10
  -3  13   1   95.09    5.20
  -3  13   1   92.89    5.00
   3  13  -1   87.59    5.10
  -3  13   1  102.09    5.20
   3  13  -1   87.79    4.20
   3  13  -1   88.49    5.30
   3  13  -1   89.39    5.10
   3  13  -1   90.09    4.20
  -3  13   1   87.79    5.40
   3  13  -1   90.69    5.20
  -3  13   1   94.69    4.60
   2 -13  -1   21.80    2.80
   2 -13  -1   20.10    1.80
   2 -13  -1   21.40    2.60
  -2 -13   1   18.90    2.40
   2 -13  -1   19.20    2.40
  -2 -13   1   20.70    2.20
  -2 -13   1   20.70    1.50
  -2 -13   1   21.00    2.50
   2 -13  -1   19.70    2.70
  -2  13   1   21.40    2.50
   2  13  -1   18.40    2.60
  -2  13   1   17.50    2.70
  -2  13   1   22.30    1.50
   2  13  -1   16.60    1.70
   2  13  -1   19.50    1.60
   2  13  -1   23.60    2.90
   2  13  -1   17.90    2.60
  -2  13   1   19.80    2.60
  -2  13   1   22.10    2.70
  -1 -13   1   37.40    2.50
   1 -13  -1   37.40    2.80
  -1 -13   1   41.20    2.10
   1 -13  -1   38.80    2.80
  -1 -13   1   43.00    2.70
  -1 -13   1   41.60    2.90
   1 -13  -1   38.10    2.20
   1 -13  -1   34.60    2.80
   1  13  -1   37.70    1.80
   1  13  -1   40.20    2.40
  -1  13   1   37.70    2.20
   1  13  -1   39.90    2.00
   1  13  -1   39.40    3.20
   1  13  -1   37.70    2.60
   1  13  -1   36.00    2.60
  -1  13   1   36.90    2.70
  -1  13   1   38.90    2.80
  -1  13   1   37.30    3.00
  -1  13   1   37.40    2.80
   0 -13   1   26.90    1.80
   0 -13  -1   28.20    2.00
   0 -13   1   28.60    2.00
   0 -13  -1   29.90    2.40
   0 -13   1   29.60    2.00
   0 -13  -1   29.90    2.10
   0 -13   1   26.80    1.90
   0 -13   1   32.40    2.60
   0 -13  -1   27.60    1.90
   0  13  -1   28.60    2.20
   0  13   1   28.10    2.10
   0  13   1   27.30    2.00
   0  13  -1   28.00    2.00
   0  13  -1   26.30    2.30
   0  13   1   27.40    2.10
   0  13  -1   28.00    2.00
   0  13   1   29.50    1.90
   0  13  -1   28.10    1.90
   0  13   1   29.40    2.40
   0  13  -1   26.70    2.10
   1 -13   1   80.69    3.80
   1 -13   1   74.89    4.00
   1 -13   1   76.09    4.00
  -1 -13  -1   73.19    3.50
  -1 -13  -1   74.09    3.70
   1 -13   1   73.29    4.00
   1 -13   1   82.39    4.50
  -1 -13  -1   78.19    4.30
  -1 -13  -1   72.19    3.10
   1 -13   1   78.79    3.00
   1  13   1   70.69    4.10
   1  13   1   79.49    3.40
   1  13   1   71.19    3.90
   1  13   1   75.89    4.30
  -1  13  -1   69.99    3.90
  -1  13  -1   77.99    4.10
   1  13   1   81.29    3.60
  -1  13  -1   70.19    4.00
  -1  13  -1   79.79    3.30
  -1  13  -1   70.89    3.90
  -2 -13  -1    2.00    1.10
   2 -13   1    4.60    1.90
   2 -13   1    0.70    1.30
   2 -13   1   -1.10    1.70
  -2 -13  -1   -2.90    1.40
   2 -13   1    3.00    2.00
   2 -13   1    2.80    1.30
  -2 -13  -1    1.00    1.40
   2 -13   1    2.30    0.70
   2  13   1    2.90    1.20
  -2  13  -1    2.80    1.40
   2  13   1    0.40    1.40
   2  13   1   -2.60    1.20
   2  13   1   -1.10    1.40
   2  13   1   -1.10    1.60
  -2  13  -1    1.50    1.70
  -2  13  -1   -1.40    1.70
   2  13   1    2.10    0.80
  -2  13  -1    1.20    1.80
   3 -13   1    1.70    1.70
   3 -13   1    5.40    1.90
  -3 -13  -1    4.10    1.50
  -3 -13  -1    5.90    2.50
   3 -13   1    5.50    2.20
   3 -13   1    3.10    2.30
  -3 -13  -1    3.50    2.20
   3 -13   1    4.50    2.40
   3  13   1    1.30    1.60
  -3  13  -1    2.90    1.50
   3  13   1    3.50    2.20
   3  13   1    5.50    2.10
  -3  13  -1    1.40    2.30
   3  13   1    3.00    1.70
  -3  13  -1    4.90    1.80
   3  13   1    4.00    1.60
  -3  13  -1    5.00    2.10
   4 -13   1   37.90    4.30
   4 -13   1   42.30    5.60
   4 -13   1   33.30    4.20
  -4 -13  -1   45.10    5.00
  -4 -13  -1   38.50    3.40
   4 -13   1   32.40    4.20
   4 -13   1   34.90    4.50
  -4 -13  -1   38.00    4.50
   4  13   1   41.60    3.60
   4  13   1   34.10    4.20
  -4  13  -1   43.90    4.60
  -4  13  -1   33.30    4.10
  -4  13  -1   39.10    4.20
   4  13   1   39.20    4.70
   4  13   1   33.60    4.10
   4  13   1   38.60    4.30
  -4  13  -1   35.70    4.50
   5 -13   1    3.10    2.60
   5 -13   1    8.30    2.90
  -5 -13  -1   10.60    3.90
  -5 -13  -1    6.40    2.80
   5 -13   1    7.80    3.10
   5 -13   1    9.30    3.70
   5 -13   1    6.80    3.50
  -5 -13  -1    9.70    2.50
   5  13   1   12.10    3.70
   5  13   1    8.10    3.80
  -5  13  -1    5.70    2.90
  -5  13  -1    9.00    3.00
   5  13   1    4.50    2.60
  -5  13  -1    4.20    3.40
  -5  13  -1    4.80    2.80
   6 -13   1   15.70    4.10
   6 -13   1   13.60    4.70
   6 -13   1   14.40    4.60
  -6 -13  -1   15.50    4.90
   6 -13   1   23.40    6.00
   6 -13   1   11.40    3.60
  -6 -13  -1   14.80    3.80
  -6  13  -1   13.80    3.50
  -6  13  -1   20.90    4.70
  -6  13  -1   12.60    4.10
   6  13   1   20.10    4.20
  -6  13  -1   17.40    4.00
   6  13   1   10.70    3.70
   6  13   1   18.90    4.70
  -7 -13  -1    3.30    4.90
   7 -13   1    1.60    4.70
  -7 -13  -1   -2.80    2.90
   7 -13   1   -1.00    3.30
   7 -13   1    4.80    4.60
   7  13   1    2.50    2.80
  -7  13  -1    0.10    3.20
  -7  13  -1    2.20    3.10
   7  13   1  -10.70    3.30
   7  13   1   -1.90    3.30
   7 -14  -1   39.50    5.90
  -7 -14   1   34.00    5.70
  -7 -14   1   44.10    5.50
   7 -14  -1   33.20    5.90
  -7 -14   1   43.10    6.30
   7 -14  -1   36.60    6.40
  -7  14   1   31.30    5.30
  -7  14   1   38.10    5.40
   7  14  -1   39.70    5.60
   7  14  -1   51.49    6.30
  -7  14   1   37.40    5.90
   7  14  -1   46.10    6.80
   6 -14  -1   74.09    6.70
  -6 -14   1   69.29    6.10
   6 -14  -1   44.10    5.80
  -6 -14   1   62.49    5.70
  -6 -14   1   79.29    7.30
   6 -14  -1   68.99    6.40
   6 -14  -1   60.59    7.90
   6  14  -1   60.39    6.90
  -6  14   1   61.99    6.60
   6  14  -1   54.19    6.40
  -6  14   1   71.39    6.60
  -6  14   1   61.19    6.70
  -6  14   1   61.29    5.70
   6  14  -1   59.89    5.90
  -5 -14   1   12.00    2.90
   5 -14  -1   11.60    2.90
  -5 -14   1   15.00    3.70
   5 -14  -1    9.80    3.70
   5 -14  -1    8.70    3.50
  -5 -14   1   16.90    4.00
   5 -14  -1   14.90    3.70
   5  14  -1    7.60    3.60
   5  14  -1    6.30    2.80
  -5  14   1   14.60    3.90
  -5  14   1   12.20    3.60
  -5  14   1   12.30    3.30
   5  14  -1    8.40    3.20
   5  14  -1   11.80    3.80
  -4 -14   1   28.40    3.80
   4 -14  -1   27.10    4.00
   4 -14  -1   35.10    3.40
   4 -14  -1   29.70    3.70
   4 -14  -1   28.60    4.50
   4 -14  -1   35.40    4.30
  -4 -14   1   32.50    3.70
  -4 -14   1   30.70    4.20
  -4  14   1   35.50    4.10
  -4  14   1   32.10    4.20
  -4  14   1   26.40    3.60
   4  14  -1   27.90    4.20
  -4  14   1   38.30    3.80
   4  14  -1   33.70    4.40
   4  14  -1   29.90    3.70
   4  14  -1   26.40    4.20
   3 -14  -1    4.00    1.80
   3 -14  -1    4.10    1.50
  -3 -14   1    7.40    2.20
  -3 -14   1    3.80    1.30
   3 -14  -1    6.90    2.50
  -3 -14   1    5.40    2.30
   3 -14  -1    3.80    1.80
   3 -14  -1    6.30    2.30
  -3 -14   1    3.70    2.10
   3  14  -1    7.10    2.40
   3  14  -1    2.70    1.80
  -3  14   1    5.30    2.20
   3  14  -1    4.00    1.40
  -3  14   1    5.60    1.90
   3  14  -1    4.70    2.30
   3  14  -1    3.40    1.30
  -3  14   1    3.20    2.00
   3  14  -1    4.60    1.90
  -3  14   1    3.20    1.70
   2 -14  -1   91.49    4.90
  -2 -14   1   91.89    3.90
  -2 -14   1   96.49    4.70
   2 -14  -1   92.49    5.50
   2 -14  -1   89.99    4.90
  -2 -14   1   87.29    4.70
   2 -14  -1   94.19    4.30
  -2 -14   1   99.09    5.20
   2 -14  -1  100.69    5.20
   2  14  -1   98.59    3.90
   2  14  -1   86.39    5.10
   2  14  -1   86.49    4.70
   2  14  -1   86.49    5.10
  -2  14   1   95.29    5.10
  -2  14   1   92.29    5.00
  -2  14   1   96.09    5.00
   2  14  -1   87.79    4.20
  -2  14   1   95.69    3.90
  -2  14   1   88.19    4.90
  -1 -14   1   65.29    2.90
  -1 -14   1   61.89    3.30
   1 -14  -1   65.09    3.70
   1 -14  -1   59.69    3.80
   1 -14  -1   58.59    3.60
   1 -14  -1   58.49    2.90
  -1 -14   1   60.59    3.40
  -1 -14   1   60.29    3.70
   1  14  -1   63.79    2.60
   1  14  -1   61.09    2.80
   1  14  -1   61.49    3.50
  -1  14   1   57.19    3.80
   1  14  -1   58.19    3.30
  -1  14   1   57.29    3.50
  -1  14   1   58.09    3.00
   1  14  -1   61.49    3.20
  -1  14   1   61.19    3.60
   1  14  -1   65.69    3.90
  -1  14   1   62.39    3.60
   0 -14   1   24.50    2.30
   0 -14   1   18.70    1.90
   0 -14  -1   21.30    2.00
   0 -14   1   22.40    1.60
   0 -14  -1   24.00    2.10
   0 -14  -1   21.00    1.80
   0 -14  -1   23.20    1.70
   0 -14   1   20.30    2.00
   0 -14  -1   25.40    2.30
   0 -14   1   26.20    1.90
   0  14  -1   25.30    2.10
   0  14   1   24.20    2.10
   0  14  -1   23.00    2.30
   0  14  -1   27.20    2.00
   0  14  -1   25.20    1.80
   0  14   1   21.10    1.90
   0  14   1   24.70    2.60
   0  14  -1   23.40    1.80
   0  14   1   23.40    1.70
   0  14  -1   25.70    2.20
   0  14   1   23.00    2.00
  -1 -14  -1   84.39    3.80
  -1 -14  -1   85.89    3.50
   1 -14   1   85.39    3.30
   1 -14   1   74.79    4.20
  -1 -14  -1   82.89    4.50
   1 -14   1   85.69    4.00
   1 -14   1   81.59    4.90
  -1 -14  -1   81.19    4.10
   1 -14   1   81.19    4.20
   1 -14   1   81.19    4.30
  -1  14  -1   80.19    4.20
  -1  14  -1   79.99    4.40
  -1  14  -1   80.59    4.20
   1  14   1   83.09    3.70
  -1  14  -1   74.39    4.10
   1  14   1   76.09    4.60
   1  14   1   82.79    4.20
  -1  14  -1   84.49    3.50
   1  14   1   82.99    3.90
   1  14   1   81.69    4.20
   2 -14   1  134.79    5.90
  -2 -14  -1  140.99    6.70
  -2 -14  -1  126.29    5.90
   2 -14   1  123.59    6.30
   2 -14   1  132.69    6.40
   2 -14   1  127.89    4.80
  -2 -14  -1  129.39    5.40
   2 -14   1  124.79    6.90
   2 -14   1  134.79    6.40
   2  14   1  124.19    6.20
   2  14   1  128.29    6.10
   2  14   1  124.49    4.90
  -2  14  -1  128.89    6.40
   2  14   1  129.49    5.60
   2  14   1  130.19    6.50
  -2  14  -1  133.39    6.40
  -2  14  -1  134.59    6.00
  -2  14  -1  119.79    5.90
   2  14   1  129.09    6.20
   3 -14   1  130.29    6.80
  -3 -14  -1  138.69    5.90
   3 -14   1  137.69    7.90
  -3 -14  -1  131.19    6.60
   3 -14   1  130.69    6.70
   3 -14   1  134.89    6.50
   3 -14   1  131.39    6.70
  -3 -14  -1  140.09    7.40
  -3  14  -1  133.69    6.20
   3  14   1  132.19    6.70
   3  14   1  131.29    6.80
  -3  14  -1  133.29    6.80
   3  14   1  127.79    6.60
  -3  14  -1  125.09    6.30
  -3  14  -1  126.39    6.60
   3  14   1  133.99    7.00
   3  14   1  129.39    6.00
   4 -14   1   45.20    4.90
   4 -14   1   44.30    4.80
   4 -14   1   39.70    4.50
  -4 -14  -1   40.80    3.60
   4 -14   1   46.10    5.10
   4 -14   1   47.10    6.00
  -4 -14  -1   49.80    4.70
  -4 -14  -1   46.10    4.60
  -4  14  -1   42.60    4.90
   4  14   1   48.10    5.10
   4  14   1   42.10    4.60
   4  14   1   46.80    4.80
   4  14   1   40.00    3.70
  -4  14  -1   45.00    4.80
  -4  14  -1   44.40    4.30
   4  14   1   43.50    4.40
  -4  14  -1   43.60    5.20
   5 -14   1   18.50    3.70
  -5 -14  -1   17.10    3.20
   5 -14   1   21.10    4.70
   5 -14   1   21.00    3.90
  -5 -14  -1   16.20    4.40
   5 -14   1   23.70    4.40
  -5 -14  -1   16.70    3.50
   5 -14   1   21.20    4.40
  -5  14  -1   15.30    4.10
  -5  14  -1   26.90    4.00
   5  14   1   16.20    3.70
   5  14   1   22.30    3.90
   5  14   1   16.10    4.00
  -5  14  -1   20.90    4.20
  -5  14  -1   16.90    3.70
  -6 -14  -1   10.90    4.70
  -6 -14  -1    4.70    3.00
   6 -14   1   12.60    4.40
   6 -14   1    2.20    3.30
   6 -14   1    4.90    3.30
   6 -14   1    4.70    4.00
  -6  14  -1    2.10    3.60
   6  14   1    3.90    3.10
  -6  14  -1    7.50    3.20
   6  14   1   -0.40    2.90
  -6  14  -1    0.70    2.90
   6  14   1    8.20    4.00
   7 -14   1   20.10    6.80
  -7 -14  -1   17.40    4.80
  -7 -14  -1   19.80    6.00
   7 -14   1   29.70    5.60
   7 -14   1   32.00    6.40
   7  14   1   16.90    4.90
   7  14   1   28.50    5.80
  -7  14  -1   23.90    5.60
   7  14   1   24.60    5.30
  -7  14  -1   18.40    4.40
   7 -15  -1    5.10    3.20
  -7 -15   1    9.90    4.90
   7 -15  -1    9.60    5.00
  -7 -15   1    0.80    3.90
   7 -15  -1    6.50    4.70
  -7 -15   1    4.30    3.20
   7  15  -1    5.40    4.60
   7  15  -1    5.80    4.60
   7  15  -1   10.00    4.80
  -7  15   1    8.80    3.90
  -7  15   1   10.10    4.50
  -7  15   1    2.70    3.10
   6 -15  -1   29.10    5.10
   6 -15  -1   38.10    5.90
   6 -15  -1   31.80    6.30
  -6 -15   1   44.10    6.30
   6 -15  -1   28.00    4.60
  -6 -15   1   26.10    4.50
  -6 -15   1   42.20    5.30
  -6  15   1   33.50    4.90
  -6  15   1   29.10    5.20
   6  15  -1   28.10    4.80
  -6  15   1   29.00    4.60
  -6  15   1   28.30    5.20
   6  15  -1   34.40    5.00
   6  15  -1   36.90    5.80
  -5 -15   1  118.49    7.50
   5 -15  -1  106.59    7.10
  -5 -15   1  127.19    8.20
   5 -15  -1  106.99    8.50
   5 -15  -1  105.79    6.50
   5 -15  -1  120.79    7.70
   5 -15  -1  107.29    6.90
  -5 -15   1  109.09    7.10
   5  15  -1  127.49    7.90
   5  15  -1  114.59    7.70
   5  15  -1  109.09    7.50
  -5  15   1  109.29    7.50
  -5  15   1  110.89    6.60
   5  15  -1  110.59    7.50
  -5  15   1  102.29    6.90
  -4 -15   1  288.87   12.50
   4 -15  -1  269.97   12.20
  -4 -15   1  271.47   11.90
   4 -15  -1  284.57   13.30
  -4 -15   1  281.77   12.10
   4 -15  -1  272.77   12.10
   4 -15  -1  294.17   12.40
   4 -15  -1  271.47   11.30
  -4  15   1  250.57   11.90
   4  15  -1  261.27   12.10
  -4  15   1  296.57   11.80
  -4  15   1  298.87   12.50
  -4  15   1  288.27   12.00
   4  15  -1  289.37   12.30
   4  15  -1  285.97   12.70
   4  15  -1  264.77   12.30
   3 -15  -1  213.68    9.60
   3 -15  -1  194.78    9.90
   3 -15  -1  205.88    8.50
   3 -15  -1  193.68    9.10
  -3 -15   1  201.68    9.10
   3 -15  -1  220.28    9.50
  -3 -15   1  217.18    9.60
  -3 -15   1  207.38    9.10
  -3 -15   1  207.98    7.80
   3  15  -1  205.88    8.10
   3  15  -1  198.58    9.70
   3  15  -1  235.28    9.60
   3  15  -1  205.38    8.10
  -3  15   1  207.08    9.50
   3  15  -1  207.48    9.50
  -3  15   1  207.88    9.20
  -3  15   1  211.38    9.10
  -3  15   1  209.98    9.20
   3  15  -1  216.78    9.40
  -2 -15   1   67.19    4.20
  -2 -15   1   68.09    4.00
  -2 -15   1   74.09    3.30
   2 -15  -1   73.69    4.50
  -2 -15   1   70.19    4.00
   2 -15  -1   71.19    4.50
   2 -15  -1   74.49    5.00
   2 -15  -1   72.29    3.70
   2  15  -1   68.79    4.30
  -2  15   1   71.09    4.40
   2  15  -1   74.69    4.90
   2  15  -1   69.49    4.30
   2  15  -1   73.99    3.70
  -2  15   1   69.39    4.40
   2  15  -1   73.39    3.30
  -2  15   1   72.19    3.30
  -2  15   1   76.09    4.50
  -2  15   1   72.79    4.50
  -1 -15   1   10.10    1.60
   1 -15  -1    8.80    1.70
   1 -15  -1    8.30    1.80
  -1 -15   1    8.90    1.70
  -1 -15   1   10.40    1.40
   1 -15  -1    8.50    1.30
   1 -15  -1    9.80    0.80
   1 -15  -1   10.80    2.00
  -1 -15   1    9.80    2.00
  -1  15   1    9.80    1.50
  -1  15   1   10.40    2.00
   1  15  -1   10.70    2.00
   1  15  -1   10.00    2.00
  -1  15   1   11.80    1.90
   1  15  -1   10.30    1.20
   1  15  -1    9.10    1.50
  -1  15   1    9.80    1.90
  -1  15   1   10.20    1.90
   1  15  -1    8.50    1.70
   1  15  -1   10.10    1.10
   0 -15  -1    5.40    1.30
   0 -15  -1    4.90    1.30
   0 -15   1    5.20    1.30
   0 -15   1    5.40    1.40
   0 -15   1    3.80    1.40
   0 -15   1    6.20    1.10
   0 -15  -1    5.10    1.00
   0 -15  -1    3.10    1.30
   0 -15   1    6.30    1.30
   0 -15  -1    4.00    1.70
   0  15  -1    5.30    1.50
   0  15   1    3.00    1.70
   0  15   1    4.00    1.20
   0  15  -1    5.70    1.10
   0  15   1    5.60    1.40
   0  15  -1    4.10    1.50
   0  15  -1    3.90    1.20
   0  15   1    5.20    1.40
   0  15  -1    4.50    1.10
   0  15   1    6.30    1.50
   0  15  -1    2.40    1.30
   0  15   1    3.50    1.10
  -1 -15  -1  195.78    7.00
   1 -15   1  194.98    6.80
  -1 -15  -1  180.08    7.60
   1 -15   1  189.58    7.80
  -1 -15  -1  192.38    8.30
   1 -15   1  193.08    8.50
   1 -15   1  197.98    8.00
  -1 -15  -1  191.68    7.40
   1 -15   1  188.48    7.80
   1 -15   1  195.68    7.70
  -1  15  -1  192.68    8.00
   1  15   1  193.88    8.10
  -1  15  -1  186.08    7.80
   1  15   1  194.68    7.80
  -1  15  -1  187.38    7.80
   1  15   1  198.58    7.30
  -1  15  -1  186.28    8.00
   1  15   1  191.28    8.30
   1  15   1  193.28    7.40
  -1  15  -1  201.08    7.20
   2 -15   1    8.80    1.90
   2 -15   1    5.20    1.70
   2 -15   1    9.20    2.20
   2 -15   1    6.70    2.20
  -2 -15  -1   10.00    2.50
   2 -15   1   11.10    1.80
  -2 -15  -1    7.00    2.00
   2 -15   1    9.80    2.60
  -2 -15  -1    9.70    1.70
  -2  15  -1    7.00    2.20
   2  15   1   11.90    2.50
   2  15   1    9.00    1.70
  -2  15  -1    8.80    2.30
   2  15   1    7.60    2.10
  -2  15  -1    6.80    2.30
   2  15   1    9.90    1.30
  -2  15  -1   10.40    2.00
   2  15   1   10.00    2.40
   2  15   1   10.10    2.10
   3 -15   1  400.46   15.90
  -3 -15  -1  412.96   14.60
   3 -15   1  391.86   15.30
   3 -15   1  409.46   15.70
   3 -15   1  416.96   16.00
  -3 -15  -1  422.96   15.70
   3 -15   1  376.36   16.60
  -3 -15  -1  399.06   16.00
   3  15   1  412.16   14.90
  -3  15  -1  406.46   15.10
   3  15   1  397.26   15.60
   3  15   1  392.86   15.80
  -3  15  -1  409.86   15.90
  -3  15  -1  413.16   15.50
  -3  15  -1  418.36   16.00
   3  15   1  393.16   15.90
   3  15   1  410.46   15.80
  -4 -15  -1   56.79    4.10
   4 -15   1   50.69    5.50
   4 -15   1   59.49    6.40
  -4 -15  -1   71.79    6.10
   4 -15   1   56.99    4.80
   4 -15   1   53.49    4.90
   4 -15   1   61.39    5.60
  -4 -15  -1   47.70    4.60
  -4  15  -1   67.09    5.80
   4  15   1   57.79    5.50
   4  15   1   50.19    4.80
   4  15   1   66.29    5.20
   4  15   1   63.79    4.70
   4  15   1   56.69    4.80
  -4  15  -1   51.29    4.20
  -4  15  -1   49.50    4.80
  -4  15  -1   53.09    5.50
   5 -15   1  109.49    7.60
   5 -15   1  104.69    8.90
  -5 -15  -1  112.59    6.40
   5 -15   1  113.39    6.70
  -5 -15  -1  118.19    8.30
  -5 -15  -1  119.09    7.80
   5 -15   1   96.39    6.80
   5 -15   1  102.79    7.00
   5  15   1   89.79    6.60
  -5  15  -1  102.49    7.50
  -5  15  -1  104.89    7.40
   5  15   1  110.69    7.80
  -5  15  -1   91.79    6.70
  -5  15  -1  106.39    6.70
   5  15   1  102.49    7.40
   6 -15   1   71.19    7.50
  -6 -15  -1   96.79    7.90
   6 -15   1   86.89    7.60
   6 -15   1   90.79    8.10
  -6 -15  -1   89.09    7.50
   6 -15   1   99.99    7.50
  -6  15  -1   81.39    7.50
   6  15   1  105.59    8.20
  -6  15  -1   86.69    7.30
  -6  15  -1   82.39    6.40
   6  15   1   91.99    7.70
   6  15   1   84.59    7.50
   7 -15   1    3.90    4.70
   7 -15   1    7.80    5.50
  -7 -15  -1    1.20    3.50
  -7 -15  -1    0.70    3.60
   7  15   1   15.50    4.90
  -7  15  -1   -1.90    3.70
   7  15   1    8.40    4.80
  -7  15  -1    1.10    3.30
   7  15   1   -1.30    3.40
   7 -16  -1    3.50    3.30
  -7 -16   1    3.40    2.90
  -7 -16   1   -0.80    3.00
   7 -16  -1    0.30    3.20
  -7 -16   1   -0.30    4.30
   7 -16  -1    2.60    4.60
   7  16  -1   -0.90    4.10
  -7  16   1    3.70    3.30
   7  16  -1    0.80    3.30
   7  16  -1   -1.40    2.90
  -7  16   1   -1.80    2.80
  -7  16   1   -0.80    3.10
   6 -16  -1   19.80    4.10
  -6 -16   1   20.70    4.40
   6 -16  -1   20.00    5.50
  -6 -16   1   29.50    5.40
  -6 -16   1   18.90    4.00
   6 -16  -1   15.20    4.10
   6  16  -1   20.00    4.70
  -6  16   1   19.40    4.10
  -6  16   1   12.50    7.00
  -6  16   1   20.90    4.30
  -6  16   1   17.60    3.90
   6  16  -1   22.50    4.60
   6  16  -1   20.30    4.30
   5 -16  -1   10.70    3.80
  -5 -16   1   16.20    3.20
  -5 -16   1   11.10    4.10
   5 -16  -1   13.90    3.80
   5 -16  -1   11.80    3.70
   5 -16  -1   14.10    3.90
  -5 -16   1   12.30    3.10
   5  16  -1   13.90    3.30
  -5  16   1    7.80    3.60
  -5  16   1   17.20    3.70
   5  16  -1   13.10    3.50
  -5  16   1   10.50    3.80
   5  16  -1   12.30    3.30
   5  16  -1   12.40    3.70
   4 -16  -1   39.70    4.80
   4 -16  -1   47.80    5.50
  -4 -16   1   57.69    4.90
   4 -16  -1   51.39    5.00
  -4 -16   1   59.79    5.30
   4 -16  -1   39.60    4.90
  -4 -16   1   34.90    4.00
   4 -16  -1   47.60    3.90
   4  16  -1   58.69    5.20
  -4  16   1   51.49    4.40
   4  16  -1   37.00    5.00
  -4  16   1   44.50    4.00
  -4  16   1   43.50    5.00
  -4  16   1   50.99    5.00
   4  16  -1   37.80    5.00
   4  16  -1   44.50    4.60
  -3 -16   1  181.98    8.50
   3 -16  -1  179.38    8.40
  -3 -16   1  172.58    6.70
  -3 -16   1  162.28    7.70
   3 -16  -1  160.38    8.70
   3 -16  -1  168.68    7.50
   3 -16  -1  178.98    8.40
  -3 -16   1  157.68    7.70
   3 -16  -1  168.48    8.10
   3  16  -1  180.18    8.60
   3  16  -1  168.48    8.00
   3  16  -1  183.18    8.90
   3  16  -1  172.98    7.00
  -3  16   1  165.48    8.10
  -3  16   1  166.68    8.20
   3  16  -1  184.68    8.20
  -3  16   1  173.68    8.10
  -3  16   1  170.68    8.10
  -2 -16   1   10.40    2.10
   2 -16  -1    9.40    2.30
   2 -16  -1    5.90    2.00
   2 -16  -1    9.30    2.30
  -2 -16   1    8.40    2.00
   2 -16  -1    8.50    1.60
  -2 -16   1    6.00    2.10
  -2 -16   1    8.10    1.30
  -2  16   1    7.60    2.00
   2  16  -1    7.20    1.90
   2  16  -1    9.00    2.20
  -2  16   1    8.70    2.20
  -2  16   1    8.80    2.20
  -2  16   1    5.70    2.10
   2  16  -1    8.80    1.70
   2  16  -1    8.60    1.30
  -2  16   1    9.30    1.40
   2  16  -1    8.30    2.10
  -1 -16   1  136.09    5.90
  -1 -16   1  147.09    5.70
  -1 -16   1  139.59    6.20
  -1 -16   1  153.28    6.80
   1 -16  -1  142.99    6.40
   1 -16  -1  136.39    6.70
   1 -16  -1  134.49    6.30
   1 -16  -1  140.19    5.70
   1 -16  -1  141.79    4.90
   1  16  -1  143.19    6.10
   1  16  -1  139.49    5.40
   1  16  -1  137.29    5.90
   1  16  -1  139.59    7.00
  -1  16   1  144.99    6.20
  -1  16   1  142.49    5.80
   1  16  -1  140.59    5.20
  -1  16   1  134.99    6.50
   1  16  -1  142.69    6.40
  -1  16   1  135.39    6.10
  -1  16   1  145.79    6.40
   0 -16   1    9.50    1.70
   0 -16  -1   13.20    1.80
   0 -16  -1   12.10    2.30
   0 -16   1   12.70    2.30
   0 -16  -1   10.70    1.80
   0 -16   1   11.70    1.50
   0 -16   1   12.30    1.70
   0 -16  -1   11.80    1.40
   0 -16  -1   13.10    1.70
   0 -16   1    9.10    1.60
   0  16  -1   10.40    1.60
   0  16  -1   12.10    2.40
   0  16   1   11.80    2.10
   0  16   1   15.00    1.90
   0  16  -1   14.10    1.80
   0  16  -1   10.60    1.70
   0  16   1   10.20    1.60
   0  16  -1   12.40    1.50
   0  16   1    9.40    1.70
   0  16  -1   10.00    1.50
   0  16   1   13.30    1.50
   0  16   1   13.00    1.90
   1 -16   1    0.40    1.40
   1 -16   1   -0.50    0.70
   1 -16   1    0.10    1.70
  -1 -16  -1    2.40    1.80
   1 -16   1   -0.60    0.60
  -1 -16  -1   -0.10    1.20
  -1 -16  -1    0.90    1.10
   1 -16   1   -0.90    1.20
   1 -16   1    1.10    1.40
  -1 -16  -1    2.20    0.90
   1  16   1    0.80    1.70
  -1  16  -1   -0.80    0.90
  -1  16  -1   -0.30    1.50
  -1  16  -1    0.60    1.10
   1  16   1    0.40    0.90
   1  16   1    1.70    0.90
   1  16   1    2.60    1.20
  -1  16  -1    3.50    1.50
   1  16   1    0.90    1.50
   1  16   1   -0.30    1.50
  -1  16  -1    0.90    1.40
   2 -16   1   65.79    4.20
  -2 -16  -1   50.79    3.90
  -2 -16  -1   55.79    3.30
   2 -16   1   59.29    4.10
   2 -16   1   56.39    4.10
   2 -16   1   51.69    3.50
   2 -16   1   48.10    4.10
  -2 -16  -1   51.39    3.80
   2  16   1   59.29    4.30
  -2  16  -1   54.89    4.10
   2  16   1   53.99    4.10
  -2  16  -1   47.20    3.80
  -2  16  -1   54.79    4.00
   2  16   1   51.49    2.70
  -2  16  -1   56.79    3.80
   2  16   1   54.79    3.20
   2  16   1   54.59    4.00
   2  16   1   48.60    3.80
   3 -16   1   10.30    2.90
   3 -16   1    4.20    2.00
  -3 -16  -1   10.30    1.90
  -3 -16  -1   11.20    3.10
  -3 -16  -1    6.70    2.20
   3 -16   1    7.70    2.70
   3 -16   1    6.70    2.20
   3 -16   1    8.30    2.80
  -3  16  -1    5.00    2.60
   3  16   1    9.00    2.40
  -3  16  -1    6.00    2.10
   3  16   1    7.00    2.30
  -3  16  -1    8.30    2.60
   3  16   1    8.90    2.60
   3  16   1    8.70    2.40
   3  16   1    8.30    1.90
   4 -16   1  180.58    9.70
  -4 -16  -1  201.68    8.40
   4 -16   1  204.28   10.00
   4 -16   1  190.38   11.10
   4 -16   1  174.48    9.10
  -4 -16  -1  203.28   10.40
  -4 -16  -1  191.48    9.80
   4 -16   1  183.88    9.90
  -4  16  -1  202.68    9.30
   4  16   1  188.88    9.80
   4  16   1  200.98   10.10
   4  16   1  178.88    9.40
  -4  16  -1  190.48    9.90
   4  16   1  196.88    9.90
  -4  16  -1  188.58    9.70
   5 -16   1    6.90    3.00
   5 -16   1    6.80    4.20
   5 -16   1    5.30    3.60
   5 -16   1    5.80    3.30
   5 -16   1    5.90    3.70
  -5 -16  -1    8.40    3.70
  -5 -16  -1    2.40    3.60
   5  16   1    7.00    3.50
  -5  16  -1    2.70    3.30
   5  16   1    8.00    3.90
  -5  16  -1    1.80    2.80
   5  16   1    5.70    3.60
  -5  16  -1    9.00    3.70
  -5  16  -1   -3.00    3.10
   6 -16   1    7.90    3.00
  -6 -16  -1   10.30    4.70
   6 -16   1   12.50    4.70
  -6 -16  -1   15.20    4.80
   6 -16   1   15.00    5.30
   6 -16   1   17.70    4.80
   6  16   1   16.00    4.70
  -6  16  -1   12.90    3.90
  -6  16  -1   14.70    4.50
  -6  16  -1   10.10    3.70
   6  16   1    7.00    4.30
   6  16   1   14.10    4.80
  -7 -16  -1    9.10    5.50
  -7 -16  -1    9.30    4.10
   7 -16   1   17.10    6.40
   7 -16   1   12.10    5.40
  -7  16  -1    9.20    4.70
   7  16   1   11.50    4.80
   7  16   1    1.10    3.80
  -7  16  -1    4.70    4.30
   7  16   1   10.10    4.80
   7 -17  -1   -4.40    4.20
  -7 -17   1    2.70    3.90
  -7 -17   1   -4.80    4.20
   7 -17  -1    2.90    3.20
   7 -17  -1    2.70    4.70
  -7 -17   1   -3.00    2.80
   7  17  -1    3.30    3.30
   7  17  -1   -1.00    3.40
   7  17  -1    2.40    4.40
  -7  17   1    3.80    3.60
  -7  17   1    0.20    2.90
  -7  17   1   -3.60    4.20
   6 -17  -1    4.00    4.10
   6 -17  -1    2.30    3.70
  -6 -17   1    9.30    3.70
  -6 -17   1    7.70    4.40
   6 -17  -1    6.50    4.40
  -6 -17   1    4.30    3.00
   6  17  -1   -0.50    3.00
   6  17  -1    1.40    2.90
  -6  17   1    3.50    3.70
  -6  17   1   -3.30    3.40
   6  17  -1    0.90    2.80
  -6  17   1    2.40    2.50
  -5 -17   1    0.90    3.50
   5 -17  -1    2.00    3.20
   5 -17  -1   -0.10    2.50
  -5 -17   1   -1.70    2.10
   5 -17  -1    0.90    3.30
   5 -17  -1    3.50    2.80
  -5 -17   1   -0.10    3.00
   5  17  -1   -0.30    3.10
  -5  17   1   -1.80    3.10
   5  17  -1    3.60    2.70
  -5  17   1    3.90    3.10
   5  17  -1    2.90    2.80
  -5  17   1    1.00    3.40
   5  17  -1    2.10    2.30
   4 -17  -1   -0.90    2.00
  -4 -17   1    1.20    1.90
   4 -17  -1    1.90    1.90
  -4 -17   1    0.90    2.50
  -4 -17   1   -0.20    2.80
   4 -17  -1   -1.40    2.80
   4 -17  -1   -3.00    1.60
   4 -17  -1    0.30    2.90
  -4  17   1    1.70    2.00
   4  17  -1    1.40    2.20
   4  17  -1    0.40    2.20
  -4  17   1   -5.70    1.90
  -4  17   1    0.30    2.90
   4  17  -1   -2.30    2.00
  -4  17   1   -1.20    2.20
   4  17  -1   -6.00    2.50
  -3 -17   1   79.29    5.20
   3 -17  -1   85.09    4.80
   3 -17  -1   96.49    5.90
  -3 -17   1   79.59    5.00
   3 -17  -1   83.69    5.60
   3 -17  -1   93.69    6.40
   3 -17  -1   91.79    5.80
  -3 -17   1   89.19    5.80
   3  17  -1   80.79    5.80
  -3  17   1   89.79    5.50
   3  17  -1   84.39    5.70
  -3  17   1   89.69    5.90
  -3  17   1   89.89    5.70
  -3  17   1   93.99    5.60
   3  17  -1   88.29    5.80
  -2 -17   1   -0.40    1.60
   2 -17  -1    1.70    1.20
   2 -17  -1   -0.40    1.80
   2 -17  -1    2.80    1.60
  -2 -17   1   -1.90    1.50
  -2 -17   1    2.70    1.10
   2 -17  -1    1.60    1.90
  -2 -17   1   -0.20    1.20
   2  17  -1    4.90    1.30
  -2  17   1    3.30    1.20
  -2  17   1    1.00    1.40
   2  17  -1    0.20    1.30
  -2  17   1    0.60    1.90
  -2  17   1    0.20    1.90
   2  17  -1   -0.10    1.70
  -2  17   1   -0.70    1.30
   2  17  -1    4.10    1.10
   2  17  -1    0.70    1.90
   1 -17  -1    3.30    1.60
   1 -17  -1    4.10    1.10
  -1 -17   1   -1.30    1.20
   1 -17  -1    9.20    1.80
  -1 -17   1    1.30    1.30
  -1 -17   1    1.70    1.00
   1 -17  -1    2.70    1.50
  -1 -17   1   -0.60    1.00
  -1  17   1    3.90    1.30
  -1  17   1    4.80    1.60
   1  17  -1    0.40    0.70
   1  17  -1    0.90    1.30
   1  17  -1    1.40    0.90
   1  17  -1    0.30    1.20
   1  17  -1    1.70    1.90
   1  17  -1    1.90    1.30
  -1  17   1    2.70    1.60
  -1  17   1    3.60    1.60
   0 -17   1    6.50    2.00
   0 -17  -1    4.00    1.10
   0 -17  -1    3.30    1.50
   0 -17  -1    2.30    1.40
   0 -17   1    3.90    1.40
   0 -17   1    3.50    1.50
   0 -17   1    5.30    1.20
   0 -17  -1    5.50    1.40
   0 -17   1    1.00    1.20
   0 -17  -1    3.60    1.30
   0  17   1    1.20    1.10
   0  17  -1    6.00    1.30
   0  17   1    4.90    1.60
   0  17  -1    7.80    2.30
   0  17   1    3.20    1.20
   0  17   1    4.00    1.70
   0  17   1    2.90    1.40
   0  17  -1    5.00    1.30
   0  17  -1    4.10    1.40
   0  17   1    3.90    1.50
   0  17  -1    3.70    1.40
   0  17  -1    5.80    1.70
  -1 -17  -1    8.80    1.60
   1 -17   1    6.90    1.60
   1 -17   1    7.60    2.00
  -1 -17  -1    8.60    1.20
   1 -17   1    8.20    1.90
   1 -17   1    9.60    1.10
   1 -17   1    7.00    2.40
  -1 -17  -1    8.40    1.60
  -1 -17  -1   12.20    2.50
   1  17   1    9.20    1.50
   1  17   1    8.90    1.50
   1  17   1    9.90    1.30
  -1  17  -1    8.80    1.90
  -1  17  -1    6.60    1.40
   1  17   1    8.60    1.80
   1  17   1    7.10    1.70
  -1  17  -1   11.60    2.00
   1  17   1    8.20    2.30
  -1  17  -1    7.50    2.00
  -1  17  -1    6.30    2.10
   2 -17   1    3.10    2.00
  -2 -17  -1    4.60    2.30
   2 -17   1    0.80    1.80
  -2 -17  -1    0.20    1.70
   2 -17   1    2.50    1.30
   2 -17   1    0.60    2.20
   2 -17   1    1.70    1.50
  -2 -17  -1    6.80    1.70
  -2  17  -1    2.60    1.60
   2  17   1    1.80    1.60
   2  17   1    1.10    1.90
  -2  17  -1    1.70    1.80
  -2  17  -1    2.50    2.10
  -2  17  -1    1.90    1.50
   2  17   1    5.80    2.30
   2  17   1    3.20    1.10
   2  17   1    1.50    1.90
   2  17   1    2.90    1.30
   3 -17   1  223.68   10.40
  -3 -17  -1  253.77    9.40
  -3 -17  -1  237.48   11.10
   3 -17   1  239.28   10.20
   3 -17   1  233.08   11.90
   3 -17   1  255.17   10.90
   3 -17   1  237.18   10.80
  -3 -17  -1  249.38   10.60
   3  17   1  232.18   10.40
   3  17   1  213.98   10.40
  -3  17  -1  244.48   10.10
  -3  17  -1  234.08   10.50
   3  17   1  224.68   10.50
  -3  17  -1  240.18   10.80
   3  17   1  251.07   10.80
  -3  17  -1  245.48   10.30
   3  17   1  240.88    9.60
   4 -17   1  318.57   13.40
  -4 -17  -1  329.07   12.40
   4 -17   1  302.47   15.50
   4 -17   1  331.87   13.90
  -4 -17  -1  317.67   13.50
  -4 -17  -1  351.66   14.70
   4 -17   1  297.27   13.70
   4 -17   1  309.77   14.00
   4  17   1  306.97   13.80
  -4  17  -1  313.57   13.70
  -4  17  -1  339.57   13.50
  -4  17  -1  323.67   14.10
   4  17   1  311.17   13.60
   4  17   1  322.17   14.00
   4  17   1  319.67   13.90
  -5 -17  -1   12.00    3.90
   5 -17   1   11.70    3.80
   5 -17   1    2.70    3.70
  -5 -17  -1   13.30    4.40
   5 -17   1    5.80    3.10
   5 -17   1    9.90    3.30
   5 -17   1   12.40    4.90
  -5  17  -1   10.20    3.80
   5  17   1   14.00    4.20
  -5  17  -1    3.70    2.80
   5  17   1   10.90    4.00
  -5  17  -1   10.60    3.90
  -5  17  -1    4.80    3.20
   5  17   1    7.70    3.90
  -6 -17  -1   21.90    5.70
   6 -17   1   17.30    5.80
  -6 -17  -1   23.20    5.20
   6 -17   1   21.50    5.10
   6 -17   1   20.80    5.30
   6 -17   1   16.90    4.30
  -6  17  -1   19.70    4.80
   6  17   1   26.00    5.70
  -6  17  -1   20.60    5.30
   6  17   1   12.70    4.80
   6  17   1   19.40    4.20
  -6  17  -1   22.40    4.60
   7 -17   1    0.40    4.90
  -7 -17  -1    3.20    3.60
  -7 -17  -1    5.10    5.30
   7 -17   1    4.10    4.80
   7  17   1    0.30    3.10
  -7  17  -1   -0.20    4.10
   7  17   1    6.40    4.50
   7  17   1    3.10    3.90
  -7  17  -1    2.40    3.30
   7 -18  -1   16.60    6.20
  -7 -18   1   17.00    4.40
   7 -18  -1   15.00    5.70
   7 -18  -1   18.80    5.30
  -7 -18   1   17.40    5.00
  -7 -18   1   20.00    5.10
  -7  18   1   11.60    4.90
   7  18  -1   21.40    5.70
  -7  18   1   24.40    4.90
   7  18  -1   15.80    4.70
   7  18  -1   20.70    5.80
  -7  18   1    7.50    5.00
   6 -18  -1   38.20    5.70
   6 -18  -1   31.90    6.00
  -6 -18   1   37.50    5.50
   6 -18  -1   35.40    5.80
  -6 -18   1   34.10    5.00
  -6 -18   1   33.10    6.20
   6  18  -1   36.80    5.40
   6  18  -1   45.30    6.30
  -6  18   1   39.90    5.50
  -6  18   1   32.60    5.70
   6  18  -1   49.00    6.80
  -6  18   1   41.10    5.50
   5 -18  -1    9.40    3.60
  -5 -18   1    3.80    3.70
  -5 -18   1    5.60    2.70
   5 -18  -1    3.30    3.60
   5 -18  -1   -1.70    3.20
   5 -18  -1    5.90    3.90
  -5 -18   1    5.70    2.60
   5  18  -1   -0.10    2.60
  -5  18   1    4.00    3.10
   5  18  -1    3.50    3.20
  -5  18   1    1.50    3.20
   5  18  -1    9.60    3.30
   5  18  -1    6.20    2.90
  -5  18   1    5.60    3.60
   4 -18  -1   -5.20    2.60
   4 -18  -1   -0.70    2.10
   4 -18  -1    0.00    1.80
  -4 -18   1    3.60    3.00
   4 -18  -1   -1.80    2.70
   4 -18  -1    0.40    2.70
  -4 -18   1    3.10    2.70
  -4 -18   1    4.70    2.30
   4  18  -1    0.50    2.20
  -4  18   1    3.40    2.20
   4  18  -1    1.50    2.20
   4  18  -1    2.40    2.40
   4  18  -1    4.70    3.30
  -4  18   1   -3.30    2.70
  -4  18   1   -2.90    2.30
  -4  18   1    1.40    3.00
   3 -18  -1   37.00    4.10
   3 -18  -1   41.10    4.60
   3 -18  -1   33.10    3.20
  -3 -18   1   38.60    4.00
  -3 -18   1   37.10    3.70
   3 -18  -1   44.50    4.60
  -3 -18   1   36.40    4.00
   3 -18  -1   40.20    5.10
   3  18  -1   40.90    5.00
   3  18  -1   33.80    4.20
  -3  18   1   38.40    4.00
   3  18  -1   36.00    4.50
  -3  18   1   39.60    4.20
  -3  18   1   38.90    4.30
  -3  18   1   37.90    4.10
  -2 -18   1  195.68    8.80
   2 -18  -1  182.88    8.40
  -2 -18   1  182.08    8.00
   2 -18  -1  180.58    7.50
   2 -18  -1  178.68    8.30
   2 -18  -1  185.08    9.20
  -2 -18   1  190.38    7.10
  -2 -18   1  183.18    8.00
   2  18  -1  174.98    7.40
   2  18  -1  188.28    9.10
  -2  18   1  177.48    8.40
   2  18  -1  184.08    8.40
  -2  18   1  185.78    8.40
  -2  18   1  170.98    8.00
   2  18  -1  184.78    8.10
  -2  18   1  183.38    7.20
  -2  18   1  185.78    8.30
   2  18  -1  183.78    7.10
  -1 -18   1    0.80    1.30
   1 -18  -1    0.00    1.40
  -1 -18   1    1.60    1.40
   1 -18  -1    0.80    1.60
  -1 -18   1    3.00    1.20
  -1 -18   1    3.00    1.30
   1 -18  -1    3.30    1.20
   1 -18  -1    0.80    1.20
   1  18  -1    1.60    1.40
   1  18  -1    1.90    1.40
  -1  18   1    2.60    1.60
   1  18  -1    2.10    1.00
   1  18  -1    3.80    2.20
  -1  18   1    3.10    1.40
  -1  18   1   -0.50    1.70
  -1  18   1    2.70    1.70
  -1  18   1    3.00    1.40
   1  18  -1    5.10    1.60
   0 -18   1  648.94   23.30
   0 -18  -1  655.13   22.20
   0 -18  -1  642.04   22.50
   0 -18   1  650.33   22.10
   0 -18  -1  603.24   21.70
   0 -18   1  645.94   22.30
   0 -18  -1  697.23   23.70
   0 -18   1  656.93   22.40
   0 -18  -1  656.23   22.20
   0 -18   1  623.94   21.70
   0  18   1  650.33   22.30
   0  18  -1  659.43   23.40
   0  18   1  624.84   22.20
   0  18  -1  646.34   22.60
   0  18  -1  635.14   22.10
   0  18  -1  656.43   21.90
   0  18   1  641.14   22.40
   0  18  -1  646.74   22.40
   0  18   1  662.23   23.40
   0  18   1  648.94   22.50
   0  18  -1  645.44   22.10
   0  18   1  633.64   21.80
   1 -18   1  284.67   11.20
   1 -18   1  291.57   11.00
  -1 -18  -1  281.57   11.70
  -1 -18  -1  286.17   11.00
   1 -18   1  332.27   10.50
   1 -18   1  294.97   12.40
   1 -18   1  284.87   11.30
  -1 -18  -1  291.57   10.80
  -1  18  -1  279.87   11.10
  -1  18  -1  274.37   11.20
  -1  18  -1  291.57   11.10
   1  18   1  287.27   11.90
  -1  18  -1  278.47   10.50
   1  18   1  281.87   11.50
   1  18   1  279.87   10.70
   1  18   1  290.47   11.00
  -1  18  -1  291.37   11.70
   1  18   1  290.07   10.70
   2 -18   1   69.99    4.50
   2 -18   1   69.19    4.70
   2 -18   1   73.39    4.40
  -2 -18  -1   75.09    4.60
   2 -18   1   72.79    5.30
  -2 -18  -1   66.49    4.70
   2 -18   1   70.39    4.80
  -2 -18  -1   71.49    3.90
  -2  18  -1   78.59    5.00
   2  18   1   68.29    4.70
  -2  18  -1   76.29    4.80
  -2  18  -1   80.59    5.00
  -2  18  -1   71.99    4.80
   2  18   1   71.29    5.00
   2  18   1   73.99    4.10
   2  18   1   74.49    5.20
   3 -18   1  119.59    6.40
   3 -18   1  142.29    7.70
  -3 -18  -1  139.79    7.90
  -3 -18  -1  131.59    6.10
   3 -18   1  138.49    7.60
   3 -18   1  129.49    8.60
   3 -18   1  127.89    7.10
  -3 -18  -1  136.09    7.40
   3  18   1  120.69    7.50
   3  18   1  128.69    6.40
   3  18   1  105.59    6.80
  -3  18  -1  141.29    7.30
   3  18   1  146.79    7.70
  -3  18  -1  139.09    7.60
   3  18   1  122.79    6.90
  -3  18  -1  129.39    7.10
  -3  18  -1  142.89    7.00
   4 -18   1    0.20    1.70
   4 -18   1    3.90    3.20
  -4 -18  -1    7.40    3.50
   4 -18   1    5.20    2.60
   4 -18   1    0.50    2.70
   4 -18   1    6.90    3.20
  -4 -18  -1    2.50    2.00
  -4 -18  -1    1.20    2.30
   4  18   1    7.70    2.70
   4  18   1    0.80    2.40
   4  18   1    5.60    2.90
   4  18   1    4.50    2.60
  -4  18  -1   11.60    3.60
  -4  18  -1    7.00    2.40
  -4  18  -1    8.60    2.80
   5 -18   1    4.80    3.50
   5 -18   1    7.70    4.00
   5 -18   1    9.10    3.30
  -5 -18  -1    4.20    2.70
  -5 -18  -1    9.30    3.60
   5 -18   1    8.50    3.90
   5 -18   1    7.80    4.40
   5  18   1    8.10    3.10
  -5  18  -1    5.60    2.70
  -5  18  -1    9.20    3.70
  -5  18  -1    3.90    3.70
   5  18   1    8.10    3.90
  -5  18  -1    8.30    3.70
   5  18   1    5.30    3.00
   6 -18   1    8.30    3.80
   6 -18   1   10.40    4.50
   6 -18   1    6.30    4.60
  -6 -18  -1   -1.80    3.10
   6 -18   1   -3.80    2.70
  -6 -18  -1    3.70    4.20
   6  18   1    8.10    4.60
  -6  18  -1    6.80    4.00
   6  18   1    2.30    3.80
   6  18   1    3.60    4.10
  -6  18  -1   13.00    4.00
  -6  18  -1   -2.90    3.80
  -7 -18  -1   11.40    5.20
   7 -18   1   12.30    6.30
  -7 -18  -1   10.00    4.60
  -7 -18  -1    7.40    5.50
   7 -18   1    7.00    4.20
   7  18   1   10.30    4.40
   7  18   1    4.60    3.70
  -7  18  -1    8.90    3.90
   7  18   1   13.00    5.00
  -7  18  -1    9.30    4.10
   7 -19  -1    7.60    5.00
  -7 -19   1    2.30    5.20
   7 -19  -1    3.50    3.80
  -7 -19   1    5.80    3.60
  -7 -19   1   10.00    4.30
   7 -19  -1   12.80    5.70
   7  19  -1   14.40    5.00
  -7  19   1    7.00    4.00
   7  19  -1    4.40    3.90
   7  19  -1   14.20    5.50
  -7  19   1    7.70    4.50
  -7  19   1    4.60    3.80
  -6 -19   1    8.40    3.30
  -6 -19   1   10.20    4.60
   6 -19  -1   -2.30    4.00
   6 -19  -1    1.30    3.90
   6 -19  -1    7.90    4.40
  -6 -19   1    3.70    3.70
  -6  19   1    5.10    3.60
   6  19  -1    9.30    3.70
  -6  19   1   -2.40    3.70
   6  19  -1   13.90    4.90
  -6  19   1    2.50    3.90
   6  19  -1    4.80    3.20
   5 -19  -1   17.00    3.80
   5 -19  -1   18.00    5.10
  -5 -19   1   24.30    4.00
  -5 -19   1   22.60    5.00
   5 -19  -1   21.60    4.80
   5 -19  -1   26.10    4.50
  -5 -19   1   25.50    4.40
   5  19  -1   32.00    5.40
  -5  19   1   23.60    4.70
   5  19  -1   17.90    4.00
  -5  19   1   23.20    4.40
   5  19  -1   23.10    4.80
   5  19  -1   21.10    4.50
  -5  19   1   24.70    4.30
  -4 -19   1   90.19    5.80
   4 -19  -1   93.69    6.70
  -4 -19   1   85.99    5.70
   4 -19  -1   85.79    6.50
  -4 -19   1   92.39    6.70
   4 -19  -1   80.49    7.30
   4 -19  -1   90.89    6.60
  -4  19   1   93.09    6.10
   4  19  -1   77.29    5.80
  -4  19   1   95.89    5.90
   4  19  -1   84.19    6.90
  -4  19   1   93.09    6.60
  -4  19   1   95.19    6.80
   4  19  -1   87.09    6.00
   4  19  -1   81.99    6.10
   3 -19  -1   -0.30    1.50
   3 -19  -1   -4.40    2.40
   3 -19  -1    1.30    1.90
  -3 -19   1    4.40    2.50
  -3 -19   1    2.90    2.30
  -3 -19   1    3.70    2.70
   3 -19  -1    1.70    2.10
   3  19  -1   -0.10    1.90
   3  19  -1   -0.40    2.70
  -3  19   1   -3.60    2.60
  -3  19   1    1.80    2.50
   3  19  -1    1.10    2.20
  -3  19   1    1.70    2.50
  -3  19   1    2.40    2.40
   2 -19  -1    5.20    2.10
   2 -19  -1    7.10    2.40
  -2 -19   1    4.20    1.40
   2 -19  -1    1.20    1.20
   2 -19  -1    3.70    2.20
  -2 -19   1    4.60    2.30
  -2 -19   1    5.90    2.10
  -2 -19   1    2.70    1.80
   2  19  -1    4.10    1.60
   2  19  -1    1.60    2.20
  -2  19   1    5.30    2.20
  -2  19   1    5.80    2.00
  -2  19   1    2.80    1.70
   2  19  -1    2.90    2.00
   2  19  -1    1.00    1.50
  -2  19   1    0.40    2.00
   1 -19  -1    0.40    1.50
  -1 -19   1    3.30    1.30
  -1 -19   1    1.10    1.60
  -1 -19   1    1.00    1.40
   1 -19  -1   -1.00    1.60
  -1 -19   1   -1.20    1.80
   1 -19  -1    0.40    1.20
   1 -19  -1    0.10    1.60
  -1  19   1    1.80    1.30
  -1  19   1   -1.10    1.40
   1  19  -1    0.40    1.00
   1  19  -1   -1.40    1.80
   1  19  -1    2.10    1.50
  -1  19   1   -1.20    1.40
   1  19  -1    1.20    1.40
   1  19  -1   -0.40    2.00
  -1  19   1    1.70    1.40
  -1  19   1    0.30    1.60
   0 -19  -1  419.46   14.80
   0 -19   1  388.86   14.30
   0 -19  -1  382.56   14.20
   0 -19  -1  418.36   15.10
   0 -19  -1  406.16   15.80
   0 -19  -1  414.76   14.80
   0 -19   1  418.66   14.70
   0 -19   1  411.76   14.90
   0 -19   1  429.66   16.10
   0 -19   1  409.36   14.90
   0  19   1  411.36   14.80
   0  19  -1  383.96   14.60
   0  19   1  404.86   15.00
   0  19   1  415.16   14.90
   0  19   1  419.26   16.10
   0  19   1  417.46   15.20
   0  19  -1  428.86   15.10
   0  19  -1  421.06   15.20
   0  19   1  402.76   14.30
   0  19  -1  405.46   14.60
   0  19  -1  413.36   16.00
   0  19  -1  429.66   14.50
  -1 -19  -1   59.19    3.70
   1 -19   1   64.09    5.00
   1 -19   1   64.69    4.10
   1 -19   1   63.99    4.20
  -1 -19  -1   67.19    3.90
  -1 -19  -1   69.59    4.00
  -1 -19  -1   65.19    4.40
   1 -19   1   64.59    3.90
  -1  19  -1   67.69    4.70
  -1  19  -1   65.39    4.10
   1  19   1   60.19    3.50
  -1  19  -1   68.19    3.60
  -1  19  -1   62.49    4.00
   1  19   1   70.69    4.10
   1  19   1   62.99    3.60
   1  19   1   64.19    4.10
  -1  19  -1   65.79    4.30
   1  19   1   65.09    4.90
   2 -19   1  160.78    7.50
  -2 -19  -1  171.78    8.40
  -2 -19  -1  173.28    7.20
  -2 -19  -1  183.58    8.00
   2 -19   1  187.28    8.30
   2 -19   1  168.28    9.20
   2 -19   1  188.18    8.30
   2 -19   1  168.58    8.20
  -2  19  -1  171.98    8.20
  -2  19  -1  176.28    8.20
   2  19   1  166.78    8.70
  -2  19  -1  180.28    8.20
   2  19   1  166.58    8.00
   2  19   1  165.98    8.30
  -2  19  -1  179.28    8.30
   2  19   1  168.08    7.30
  -3 -19  -1  756.22   28.70
   3 -19   1  750.22   29.60
   3 -19   1  806.72   28.50
   3 -19   1  816.52   28.60
   3 -19   1  759.12   27.90
  -3 -19  -1  802.52   27.00
  -3 -19  -1  731.53   27.90
   3 -19   1  790.02   28.70
  -3  19  -1  832.42   28.20
  -3  19  -1  784.52   28.50
   3  19   1  763.92   28.20
   3  19   1  797.72   28.80
  -3  19  -1  806.02   28.30
   3  19   1  809.12   28.40
  -3  19  -1  799.32   28.50
   3  19   1  799.92   29.00
  -4 -19  -1   42.00    5.10
  -4 -19  -1   45.70    5.70
   4 -19   1   39.10    5.20
   4 -19   1   42.00    5.50
   4 -19   1   33.40    6.10
   4 -19   1   46.40    5.30
   4 -19   1   46.30    4.90
  -4  19  -1   35.80    5.00
   4  19   1   45.60    5.20
  -4  19  -1   46.10    5.00
   4  19   1   46.40    5.50
   4  19   1   45.60    5.50
   4  19   1   46.50    5.10
  -4  19  -1   46.80    5.50
   5 -19   1   59.69    5.60
  -5 -19  -1   61.59    7.30
   5 -19   1   64.89    6.30
   5 -19   1   62.99    6.80
   5 -19   1   64.59    5.70
   5 -19   1   67.39    6.60
  -5 -19  -1   57.89    5.50
   5  19   1   61.99    6.60
  -5  19  -1   63.09    5.70
  -5  19  -1   65.99    6.50
  -5  19  -1   54.09    5.40
   5  19   1   63.49    7.20
  -5  19  -1   49.00    6.30
   5  19   1   66.59    5.90
  -6 -19  -1    7.30    4.40
  -6 -19  -1   14.10    5.40
   6 -19   1   12.50    5.50
   6 -19   1   15.50    4.80
   6 -19   1   12.00    4.20
  -6  19  -1    5.70    3.50
  -6  19  -1    7.60    3.90
   6  19   1   21.30    5.50
   6  19   1   13.10    3.70
  -6  19  -1   14.60    4.80
   6  19   1    1.40    3.00
   7 -20  -1   16.00    5.90
   7 -20  -1    3.50    5.10
   7 -20  -1   12.80    5.70
  -7 -20   1   17.60    5.10
  -7 -20   1    8.60    5.70
  -7 -20   1   19.70    5.50
  -7  20   1   13.20    5.30
  -7  20   1   21.00    5.00
   7  20  -1    8.10    5.30
   7  20  -1    7.80    4.20
  -7  20   1   13.40    5.40
   7  20  -1   27.50    5.90
  -6 -20   1   -1.20    3.40
  -6 -20   1   -2.20    2.40
   6 -20  -1   -3.30    3.90
  -6 -20   1   -2.20    4.00
   6 -20  -1   -1.70    4.00
   6 -20  -1   -6.50    2.20
  -6  20   1    3.40    2.60
  -6  20   1   -1.10    2.80
   6  20  -1    2.70    4.10
   6  20  -1   -0.70    3.10
  -6  20   1   -1.30    4.10
   6  20  -1    6.60    4.60
   5 -20  -1    5.40    3.40
   5 -20  -1   -1.80    3.00
  -5 -20   1    1.90    3.60
   5 -20  -1   -0.30    3.40
   5 -20  -1    7.10    3.20
  -5 -20   1    4.30    3.40
  -5 -20   1    7.70    2.90
   5  20  -1   10.70    3.80
   5  20  -1    6.70    4.20
   5  20  -1    1.10    2.70
  -5  20   1    1.90    2.40
  -5  20   1    3.70    3.60
   5  20  -1    7.20    3.80
  -5  20   1    7.20    3.80
   4 -20  -1    0.70    2.20
   4 -20  -1    0.80    3.00
   4 -20  -1   -1.70    3.10
  -4 -20   1    2.00    2.90
  -4 -20   1    3.70    3.20
   4 -20  -1    0.20    2.90
  -4 -20   1    0.40    2.00
  -4  20   1    5.90    2.90
   4  20  -1   -1.70    2.10
  -4  20   1    1.80    2.90
   4  20  -1    1.70    3.20
  -4  20   1   -2.20    3.10
  -4  20   1    1.80    2.30
   4  20  -1   -2.70    3.10
  -3 -20   1   13.50    3.30
  -3 -20   1   22.00    3.10
   3 -20  -1   12.40    2.90
  -3 -20   1   16.10    3.40
   3 -20  -1   18.40    4.10
   3 -20  -1   16.50    2.60
   3 -20  -1   18.30    3.10
   3  20  -1    7.90    3.40
   3  20  -1    9.50    3.20
   3  20  -1   21.80    4.30
  -3  20   1   17.10    3.00
  -3  20   1   16.30    3.30
  -3  20   1   14.80    3.10
  -3  20   1   20.60    3.60
   2 -20  -1    3.60    2.50
  -2 -20   1    0.30    2.10
  -2 -20   1    0.50    1.40
   2 -20  -1    3.60    1.50
   2 -20  -1    5.00    2.50
   2 -20  -1    5.80    2.00
  -2 -20   1   -1.20    1.90
   2  20  -1    1.60    2.10
   2  20  -1   -2.00    1.90
   2  20  -1   -2.50    2.20
  -2  20   1    3.20    2.20
  -2  20   1    4.60    2.00
   2  20  -1    0.60    1.30
  -2  20   1    0.00    2.20
  -2  20   1    0.70    1.60
  -1 -20   1   12.70    2.80
  -1 -20   1   10.90    2.30
   1 -20  -1   15.70    3.20
  -1 -20   1   13.60    1.90
   1 -20  -1   16.10    2.60
   1 -20  -1   19.40    2.20
   1 -20  -1   12.20    2.40
  -1 -20   1   12.60    2.10
   1  20  -1   13.40    2.70
  -1  20   1   17.20    2.90
  -1  20   1   14.40    2.40
   1  20  -1   10.80    1.70
   1  20  -1   16.40    2.40
  -1  20   1   13.00    2.40
  -1  20   1   14.20    2.10
   1  20  -1   15.70    3.20
   1  20  -1   14.90    2.30
  -1  20   1   15.90    2.40
   0 -20  -1   11.20    1.60
   0 -20   1   12.50    2.10
   0 -20  -1   15.00    2.10
   0 -20   1   16.40    3.00
   0 -20   1   12.70    2.10
   0 -20  -1   12.90    2.80
   0 -20   1   12.60    1.70
   0 -20   1   11.90    2.00
   0 -20  -1   10.70    1.90
   0 -20  -1   15.70    2.30
   0  20  -1   10.60    2.00
   0  20   1   13.50    2.40
   0  20  -1   14.90    2.40
   0  20   1   12.50    2.00
   0  20  -1   17.90    3.10
   0  20   1   12.70    2.00
   0  20   1   11.30    2.40
   0  20  -1   14.90    2.10
   0  20   1    8.80    1.80
   0  20  -1   15.60    2.30
   1 -20   1    9.10    2.20
  -1 -20  -1    9.20    2.00
   1 -20   1    7.20    2.30
   1 -20   1    5.80    2.20
  -1 -20  -1    9.90    2.30
  -1 -20  -1    8.60    2.00
   1 -20   1    8.60    1.90
  -1 -20  -1    9.70    1.90
   1  20   1    8.70    2.50
   1  20   1    9.30    2.00
  -1  20  -1   11.60    2.50
   1  20   1    8.40    1.80
  -1  20  -1    9.10    2.20
  -1  20  -1    9.90    2.50
   1  20   1    9.00    2.90
   1  20   1    9.80    2.00
  -1  20  -1   11.70    2.30
   2 -20   1  166.28    7.70
   2 -20   1  162.88    8.20
  -2 -20  -1  171.48    7.30
   2 -20   1  151.08    8.70
   2 -20   1  174.48    8.00
  -2 -20  -1  173.28    8.80
  -2 -20  -1  155.88    7.60
   2 -20   1  174.28    8.30
  -2  20  -1  168.38    7.90
   2  20   1  175.18    8.90
  -2  20  -1  188.98    8.60
   2  20   1  163.88    7.30
   2  20   1  165.78    8.20
  -2  20  -1  174.18    8.20
  -2  20  -1  171.68    8.20
   2  20   1  171.88    8.10
   3  20   1   17.20    3.70
   4 -20   1    1.30    2.40
   4 -20   1   -3.50    3.50
  -4 -20  -1    3.80    3.10
   4 -20   1   -0.20    2.00
   4 -20   1    2.90    3.30
  -4 -20  -1    2.90    2.70
   4 -20   1    2.30    2.60
  -4  20  -1   -2.80    2.10
  -4  20  -1   -0.60    3.00
   4  20   1    1.90    3.10
  -4  20  -1   -3.00    2.50
   4  20   1   -3.20    2.00
   4  20   1    0.00    3.20
   4  20   1   -6.40    2.10
  -5 -20  -1    4.10    2.80
   5 -20   1    2.60    2.90
   5 -20   1   -1.60    3.10
   5 -20   1    1.00    4.30
   5 -20   1   -0.90    2.50
   5 -20   1    1.90    2.90
  -5 -20  -1    3.50    4.20
  -5  20  -1   -1.50    2.90
   5  20   1    2.70    3.50
   5  20   1   -1.30    2.80
  -5  20  -1    6.00    3.80
   5  20   1    7.80    4.10
  -5  20  -1   -1.20    2.50
  -5  20  -1   -0.30    2.60
   6 -20   1   24.20    4.90
   6 -20   1   19.90    6.50
  -6 -20  -1   23.50    6.10
   6 -20   1   25.50    6.00
  -6 -20  -1   26.20    5.70
  -6  20  -1    9.70    4.80
   6  20   1   24.60    5.30
   6  20   1   14.90    4.50
  -6  20  -1   21.50    4.40
  -6  20  -1   19.20    4.00
   6  20   1   15.30    5.30
  -6 -21   1   15.40    4.40
  -6 -21   1    9.50    3.50
   6 -21  -1   10.60    4.40
   6 -21  -1    8.90    4.90
  -6 -21   1   12.90    5.20
   6 -21  -1    4.90    4.50
   6  21  -1   11.70    5.20
   6  21  -1   12.30    4.70
  -6  21   1   11.90    5.10
  -6  21   1    6.30    4.40
  -6  21   1    6.70    3.80
   6  21  -1   12.60    4.10
   5 -21  -1    6.30    4.10
  -5 -21   1    6.30    2.80
  -5 -21   1    5.20    2.90
  -5 -21   1    6.60    3.90
   5 -21  -1    0.70    4.00
   5 -21  -1   11.10    3.40
   5 -21  -1    3.20    2.90
   5  21  -1   10.90    4.20
   5  21  -1    7.20    3.20
  -5  21   1    9.30    3.90
  -5  21   1    8.60    3.60
  -5  21   1    3.00    2.90
   5  21  -1    6.40    4.20
   5  21  -1    4.90    3.20
   4 -21  -1   -3.70    2.80
   4 -21  -1    1.20    3.40
  -4 -21   1    4.20    3.00
  -4 -21   1    0.10    2.20
  -4 -21   1   -4.50    2.60
   4 -21  -1   -2.60    2.80
   4 -21  -1    2.60    2.40
  -4  21   1    1.00    3.20
  -4  21   1    1.30    3.00
   4  21  -1    2.70    3.40
   4  21  -1    2.30    2.60
   4  21  -1    3.00    3.20
  -4  21   1    2.20    2.80
  -4  21   1    0.20    2.80
   3 -21  -1   36.20    5.30
   3 -21  -1   38.30    3.50
  -3 -21   1   30.40    4.10
   3 -21  -1   30.30    4.50
  -3 -21   1   33.90    4.20
  -3 -21   1   29.00    4.10
   3 -21  -1   37.80    4.30
  -3  21   1   31.70    3.90
   3  21  -1   38.70    5.00
  -3  21   1   38.70    4.60
   3  21  -1   42.30    5.60
  -3  21   1   40.20    4.70
   3  21  -1   38.70    4.50
  -3  21   1   34.10    4.60
   2 -21  -1   26.80    3.60
  -2 -21   1   26.30    3.20
   2 -21  -1   26.30    2.80
   2 -21  -1   23.70    3.30
  -2 -21   1   20.30    3.20
   2 -21  -1   28.60    4.30
  -2 -21   1   23.10    3.60
   2  21  -1   24.20    2.80
   2  21  -1   18.80    3.20
   2  21  -1   31.10    4.10
  -2  21   1   33.10    3.40
  -2  21   1   31.80    3.80
   2  21  -1   21.70    3.70
  -2  21   1   15.50    3.20
  -2  21   1   27.40    3.60
   1 -21  -1   11.70    3.10
  -1 -21   1   16.60    2.70
   1 -21  -1   17.20    2.20
  -1 -21   1   14.30    3.00
   1 -21  -1   16.80    2.70
   1 -21  -1   18.10    2.90
  -1 -21   1   18.30    2.40
  -1 -21   1   17.40    2.20
   1  21  -1   19.20    3.00
   1  21  -1   15.40    1.90
   1  21  -1   19.50    3.60
  -1  21   1   16.30    2.70
   1  21  -1   13.90    2.30
   1  21  -1   18.80    2.60
  -1  21   1   13.80    2.60
  -1  21   1   15.80    2.90
  -1  21   1   16.30    2.80
  -1  21   1   17.50    2.50
   0 -21   1  121.19    5.90
   0 -21  -1  136.19    6.30
   0 -21  -1  121.09    5.80
   0 -21   1  130.39    5.80
   0 -21  -1  126.19    5.80
   0 -21  -1  126.89    7.10
   0 -21   1  124.49    6.80
   0 -21   1  115.69    5.20
   0 -21   1  124.89    5.90
   0  21   1  123.99    6.10
   0  21   1  120.49    6.20
   0  21  -1  120.39    5.70
   0  21   1  125.89    5.90
   0  21   1  126.79    7.20
   0  21   1  120.89    5.80
   0  21  -1  124.49    6.00
   0  21  -1  119.19    5.60
   0  21  -1  135.99    6.30
   0  21  -1  123.79    6.80
  -1 -21  -1   12.50    2.70
   1 -21   1   18.40    2.60
  -1 -21  -1   16.40    2.30
   1 -21   1   18.30    2.90
  -1 -21  -1   11.60    2.40
   1 -21   1   12.90    2.50
   1 -21   1   16.30    3.20
  -1 -21  -1   17.20    2.50
  -1  21  -1   13.50    2.60
   1  21   1   15.30    2.40
  -1  21  -1   18.10    3.10
   1  21   1   17.40    3.20
  -1  21  -1   14.20    2.60
  -1  21  -1   19.00    3.30
   1  21   1   14.90    2.20
   1  21   1   15.70    3.00
   1  21   1   18.20    2.40
   2 -21   1   59.39    5.30
   2 -21   1   71.89    5.20
   2 -21   1   59.19    4.40
  -2 -21  -1   66.99    4.80
  -2 -21  -1   76.09    4.50
   2 -21   1   69.79    5.10
  -2 -21  -1   63.89    4.60
  -2 -21  -1   64.39    5.60
   2 -21   1   61.99    5.00
  -2  21  -1   70.99    5.20
   2  21   1   60.29    5.00
   2  21   1   59.69    3.90
   2  21   1   63.89    5.20
   2  21   1   64.59    4.80
  -2  21  -1   80.89    5.20
  -2  21  -1   77.19    5.30
  -2  21  -1   69.99    5.10
   3 -21   1   54.59    5.80
  -3 -21  -1   68.99    5.50
   3 -21   1   70.79    5.80
  -3 -21  -1   63.99    6.20
  -3 -21  -1   73.79    4.40
   3 -21   1   60.89    4.90
   3 -21   1   56.39    4.90
   3 -21   1   73.59    5.80
  -3  21  -1   70.79    5.40
  -3  21  -1   68.99    5.70
   3  21   1   64.09    5.40
  -3  21  -1   63.29    5.10
   3  21   1   75.99    5.80
  -3  21  -1   66.69    5.30
   3  21   1   64.99    5.20
   4 -21   1    7.80    3.80
   4 -21   1    9.40    4.60
   4 -21   1   11.50    3.20
   4 -21   1   14.10    4.00
  -4 -21  -1   18.50    3.40
   4 -21   1   20.60    3.60
  -4 -21  -1   18.80    4.40
   4  21   1   13.40    3.40
  -4  21  -1   12.70    3.30
  -4  21  -1   16.50    3.90
  -4  21  -1   12.20    3.60
   4  21   1   12.90    3.90
   4  21   1   19.20    4.10
   4  21   1   13.60    4.10
   5 -21   1    9.30    4.40
  -5 -21  -1    6.40    3.90
   5 -21   1   14.10    3.60
   5 -21   1   10.70    4.70
   5 -21   1   12.60    4.40
  -5 -21  -1   10.70    3.80
   5 -21   1   13.60    4.50
   5  21   1    9.20    4.50
   5  21   1   10.90    4.40
  -5  21  -1   12.80    4.30
  -5  21  -1   12.70    3.90
   5  21   1   10.50    4.20
  -5  21  -1    8.00    4.60
  -5  21  -1    9.50    4.30
  -6 -21  -1   40.10    6.00
   6 -21   1   39.30    6.70
  -6 -21  -1   36.90    7.00
   6 -21   1   29.90    5.30
  -6 -21  -1   47.50    6.60
   6 -21   1   29.90    6.60
   6  21   1   40.50    6.80
  -6  21  -1   37.50    6.10
  -6  21  -1   48.10    6.90
   6  21   1   50.99    6.80
  -6  21  -1   49.10    6.30
   6  21   1   36.50    6.00
  -6 -22   1    4.20    3.00
   6 -22  -1    6.00    3.80
   6 -22  -1   -3.30    4.10
   6 -22  -1   -4.40    4.20
  -6 -22   1    2.40    4.40
  -6 -22   1    5.30    3.30
   6  22  -1   -4.20    4.30
  -6  22   1   -3.10    3.00
  -6  22   1    2.20    4.10
   6  22  -1    0.10    3.40
   6  22  -1   -6.00    3.50
  -6  22   1    1.60    3.70
   5 -22  -1   -2.70    2.90
   5 -22  -1   -1.70    3.60
   5 -22  -1    8.70    3.40
  -5 -22   1    0.50    3.70
   5 -22  -1    2.20    3.10
  -5 -22   1    2.10    3.20
  -5 -22   1    1.10    3.40
   5  22  -1   -0.70    3.40
  -5  22   1    0.00    2.90
  -5  22   1    4.70    3.50
   5  22  -1    7.00    3.80
  -5  22   1   -1.00    2.70
   5  22  -1    2.20    4.10
  -4 -22   1    4.60    3.10
  -4 -22   1    6.10    2.60
  -4 -22   1    0.50    3.10
   4 -22  -1    0.30    3.50
   4 -22  -1   -0.40    2.40
   4 -22  -1    7.10    2.90
   4  22  -1    4.70    3.70
  -4  22   1    5.00    2.60
  -4  22   1    4.50    3.10
  -4  22   1    0.10    2.80
   4  22  -1    6.40    2.70
  -4  22   1    2.50    3.30
   4  22  -1    0.70    2.50
   3 -22  -1   50.59    5.20
  -3 -22   1   49.60    5.10
   3 -22  -1   54.39    4.70
  -3 -22   1   54.19    5.20
   3 -22  -1   44.40    4.90
  -3 -22   1   49.90    4.70
   3  22  -1   49.40    5.10
  -3  22   1   56.89    5.30
   3  22  -1   51.29    5.80
  -3  22   1   52.89    5.20
   3  22  -1   57.09    5.40
  -3  22   1   54.89    4.60
  -3  22   1   45.00    4.90
   2 -22  -1  107.79    6.30
  -2 -22   1  107.69    6.00
  -2 -22   1  107.69    6.30
   2 -22  -1  110.19    6.50
   2 -22  -1  111.39    5.60
  -2 -22   1  120.69    7.00
   2 -22  -1  107.39    7.40
   2  22  -1  125.19    7.00
  -2  22   1  112.59    6.50
  -2  22   1  116.39    6.60
  -2  22   1  118.69    6.70
   2  22  -1  116.59    6.30
   2  22  -1  105.19    7.00
  -2  22   1  123.29    6.70
   2  22  -1  110.19    5.70
   1 -22  -1    2.80    2.60
  -1 -22   1   -0.30    1.50
  -1 -22   1    0.00    1.70
   1 -22  -1    1.60    2.20
  -1 -22   1    0.30    1.50
   1 -22  -1   -0.40    1.20
   1 -22  -1   -1.40    1.80
  -1 -22   1   -2.20    1.50
   1  22  -1   -0.10    1.70
  -1  22   1    0.30    1.90
  -1  22   1   -3.10    1.70
  -1  22   1    9.10    3.00
   1  22  -1    1.10    1.90
  -1  22   1    1.00    1.60
   1  22  -1    0.40    1.90
   1  22  -1    1.70    2.20
  -1  22   1    8.20    2.60
   0 -22   1    1.40    1.80
   0 -22   1    4.20    2.60
   0 -22   1    2.50    1.90
   0 -22  -1    3.50    2.00
   0 -22   1    5.30    2.00
   0 -22  -1    5.80    2.30
   0 -22  -1    4.20    2.10
   0 -22  -1    6.90    1.90
   0  22  -1    6.00    1.80
   0  22   1    5.60    1.90
   0  22  -1    4.80    2.80
   0  22  -1    5.60    1.80
   0  22  -1    3.20    2.20
   0  22   1    6.10    2.20
   0  22  -1    6.90    2.10
   0  22   1    5.70    2.10
   0  22   1    3.10    2.10
  -1 -22  -1   24.20    3.00
  -1 -22  -1   19.90    2.60
   1 -22   1   17.10    3.10
   1 -22   1   24.20    3.10
  -1 -22  -1   20.00    3.70
   1 -22   1   22.10    3.00
   1 -22   1   18.70    3.90
  -1 -22  -1   23.30    2.90
   1  22   1   25.00    2.70
  -1  22  -1   20.60    3.00
   1  22   1   22.90    4.10
  -1  22  -1   24.70    3.90
  -1  22  -1   24.10    3.00
   1  22   1   20.40    2.60
   1  22   1   20.90    3.10
   1  22   1   25.70    3.10
  -1  22  -1   25.80    3.50
  -2 -22  -1   29.60    3.70
   2 -22   1   29.70    3.90
   2 -22   1   26.80    4.80
   2 -22   1   32.00    4.10
  -2 -22  -1   27.40    3.10
  -2 -22  -1   23.10    4.30
  -2 -22  -1   25.20    3.40
   2 -22   1   24.70    3.10
   2  22   1   22.10    3.50
   2  22   1   23.00    3.50
  -2  22  -1   19.90    3.10
  -2  22  -1   26.50    3.70
   2  22   1   30.80    3.70
   2  22   1   25.10    4.00
  -2  22  -1   28.80    4.10
  -2  22  -1   23.30    3.30
  -3 -22  -1   38.60    4.90
   3 -22   1   45.60    4.40
   3 -22   1   41.10    4.80
  -3 -22  -1   35.40    4.20
   3 -22   1   46.60    4.70
   3 -22   1   42.40    6.30
   3 -22   1   39.80    5.10
  -3  22  -1   45.80    5.20
   3  22   1   38.80    4.80
  -3  22  -1   38.60    4.90
  -3  22  -1   45.90    4.70
   3  22   1   50.79    5.80
  -3  22  -1   55.09    4.90
   3  22   1   42.10    4.60
  -4 -22  -1   16.00    4.40
   4 -22   1   13.00    3.30
   4 -22   1    6.00    4.60
   4 -22   1    8.40    3.10
  -4 -22  -1    5.70    2.60
   4 -22   1   13.90    3.50
   4 -22   1    7.10    3.90
   4  22   1   13.40    3.90
   4  22   1   11.00    3.80
  -4  22  -1   12.30    3.70
   4  22   1    9.10    3.10
  -4  22  -1   11.20    3.30
   4  22   1    5.10    3.70
  -4  22  -1    6.70    3.00
  -5 -22  -1    8.50    4.10
  -5 -22  -1    2.40    3.70
   5 -22   1    2.00    4.00
   5 -22   1    0.60    3.90
  -5 -22  -1    0.40    2.40
   5 -22   1    6.80    5.00
  -5  22  -1   -2.10    3.60
  -5  22  -1    3.70    3.80
   5  22   1    8.00    4.50
  -5  22  -1    7.70    3.80
   5  22   1    1.80    4.10
   5  22   1    4.80    3.20
   6 -22   1   31.60    6.40
  -6 -22  -1   48.60    6.60
   6 -22   1   34.00    7.90
  -6 -22  -1   49.00    7.40
  -6 -22  -1   36.50    5.30
   6 -22   1   46.20    6.80
   6  22   1   36.90    6.60
  -6  22  -1   27.70    5.30
   6  22   1   29.80    5.30
  -6  22  -1   45.60    6.60
  -6  22  -1   34.80    5.10
   6  22   1   38.10    6.20
   6 -23  -1    3.90    3.70
  -6 -23   1    2.80    3.10
   6 -23  -1   -8.50    3.90
  -6 -23   1   -3.30    3.90
  -6 -23   1   -0.80    3.60
   6 -23  -1   -0.20    3.20
  -6  23   1   -3.00    4.20
   6  23  -1   -1.50    4.70
   6  23  -1    4.60    4.40
  -6  23   1    0.30    3.80
  -6  23   1   -0.10    3.20
  -5 -23   1   -1.90    3.50
   5 -23  -1   -0.90    3.60
   5 -23  -1    5.30    4.20
  -5 -23   1   -4.10    3.10
  -5 -23   1   -6.10    2.80
   5 -23  -1    0.20    4.00
   5  23  -1    2.20    3.70
  -5  23   1   -0.90    3.20
   5  23  -1    3.20    4.10
   5  23  -1   -2.40    3.30
  -5  23   1   -1.20    3.50
   4 -23  -1    1.90    2.60
  -4 -23   1    4.20    3.10
  -4 -23   1   -4.10    2.80
   4 -23  -1   -3.00    3.40
   4 -23  -1   -4.00    3.10
  -4 -23   1   -2.30    3.00
  -4  23   1   -1.30    2.70
   4  23  -1   -0.10    3.00
   4  23  -1    1.60    2.80
  -4  23   1    1.60    3.00
  -4  23   1    2.00    3.30
  -4  23   1   -0.10    3.10
   4  23  -1   -2.10    3.40
  -3 -23   1   70.99    5.90
   3 -23  -1   60.39    5.60
   3 -23  -1   66.69    6.60
  -3 -23   1   64.59    5.30
   3 -23  -1   48.90    4.80
  -3 -23   1   54.09    5.00
   3  23  -1   58.89    5.30
  -3  23   1   64.29    5.60
  -3  23   1   56.69    5.50
  -3  23   1   70.89    5.80
   3  23  -1   54.99    5.00
  -3  23   1   61.99    4.90
   3  23  -1   54.09    5.50
   2 -23  -1   78.89    5.70
  -2 -23   1   79.69    5.40
  -2 -23   1   78.69    5.10
   2 -23  -1   74.39    4.50
   2 -23  -1   73.09    5.40
   2 -23  -1   77.39    6.40
  -2 -23   1   84.99    6.00
  -2  23   1   75.49    5.60
   2  23  -1   71.89    5.90
   2  23  -1   77.89    4.80
  -2  23   1   85.89    5.70
  -2  23   1   79.29    5.50
   2  23  -1   81.69    5.30
   2  23  -1   66.99    5.20
  -2  23   1   77.39    5.50
  -1 -23   1   12.40    2.70
   1 -23  -1   10.70    2.60
  -1 -23   1   12.60    2.90
   1 -23  -1   14.90    2.30
  -1 -23   1   12.80    2.50
  -1 -23   1   11.10    2.30
   1 -23  -1   14.80    2.60
   1 -23  -1   12.20    3.00
   1  23  -1   12.50    2.60
  -1  23   1   14.30    2.50
  -1  23   1   12.20    2.70
   1  23  -1   14.10    2.70
  -1  23   1    9.90    2.60
   1  23  -1   12.90    3.10
  -1  23   1   12.30    3.50
  -1  23   1   18.10    3.20
   1  23  -1   12.10    3.00
   0 -23   1  125.69    6.40
   0 -23  -1  134.99    7.80
   0 -23  -1  135.59    6.60
   0 -23   1  130.79    7.30
   0 -23   1  126.99    6.40
   0 -23  -1  130.99    6.20
   0  23   1  137.49    6.70
   0  23  -1  129.39    6.70
   0  23   1  125.39    7.30
   0  23  -1  131.99    6.50
   0  23  -1  126.09    6.10
   0  23  -1  142.09    7.90
   0  23   1  119.09    6.40
   0  23   1  124.99    6.20
  -1 -23  -1   93.79    5.60
   1 -23   1   95.09    5.40
   1 -23   1  103.39    5.70
  -1 -23  -1   92.79    5.10
  -1 -23  -1   91.29    6.50
   1 -23   1   95.29    7.00
   1 -23   1  101.79    5.90
  -1 -23  -1   94.29    5.10
   1  23   1   94.39    5.00
   1  23   1  100.49    6.20
   1  23   1   99.99    5.10
  -1  23  -1   94.49    5.60
   1  23   1   97.19    6.80
  -1  23  -1  107.89    6.70
   1  23   1  101.79    5.50
  -1  23  -1  104.09    5.60
  -1  23  -1   92.69    5.50
  -2 -23  -1  106.29    6.20
   2 -23   1   90.39    5.70
  -2 -23  -1  101.49    6.00
  -2 -23  -1  109.49    7.40
  -2 -23  -1  110.89    5.90
   2 -23   1  104.79    6.60
   2 -23   1   94.39    7.60
   2 -23   1  106.89    6.50
  -2  23  -1  107.59    6.40
   2  23   1  107.99    7.00
  -2  23  -1  105.09    6.50
   2  23   1   93.79    6.70
   2  23   1  113.59    6.40
  -2  23  -1  100.59    6.10
  -2  23  -1  106.79    6.90
  -3 -23  -1   64.59    5.30
  -3 -23  -1   62.69    5.40
   3 -23   1   70.89    5.70
   3 -23   1   55.39    4.80
   3 -23   1   69.49    5.90
   3 -23   1   63.29    6.90
   3 -23   1   62.39    5.20
  -3 -23  -1   66.59    6.20
  -3  23  -1   56.89    5.70
   3  23   1   63.49    5.60
  -3  23  -1   68.59    5.50
   3  23   1   66.29    5.60
   3  23   1   76.19    6.30
  -3  23  -1   62.79    5.70
  -3  23  -1   61.59    4.90
   4 -23   1   26.40    5.00
   4 -23   1   25.00    4.10
  -4 -23  -1   28.00    4.50
  -4 -23  -1   30.70    5.20
   4 -23   1   35.30    6.60
   4 -23   1   25.30    5.00
  -4 -23  -1   17.60    4.10
   4 -23   1   34.60    5.00
   4  23   1   28.00    5.20
  -4  23  -1   22.50    4.50
   4  23   1   24.70    4.60
  -4  23  -1   22.00    4.60
  -4  23  -1   27.20    4.10
   4  23   1   25.60    4.80
   5 -23   1   63.39    7.20
  -5 -23  -1   72.69    6.80
  -5 -23  -1   62.99    7.70
   5 -23   1   71.59    7.90
   5 -23   1   53.99    7.90
  -5 -23  -1   64.89    6.80
  -5  23  -1   64.49    7.10
  -5  23  -1   55.19    5.30
  -5  23  -1   57.89    6.90
   5  23   1   58.29    6.90
   5  23   1   72.79    7.70
   5  23   1   56.69    7.30
   6 -23   1    4.50    3.90
   6 -23   1    5.30    4.40
  -6 -23  -1    6.70    4.50
   6 -23   1   10.50    4.80
  -6 -23  -1    6.20    4.10
  -6 -23  -1   11.40    4.60
   6  23   1    4.30    5.10
   6  23   1    4.00    5.00
   6  23   1    4.50    4.50
  -6  23  -1   17.10    5.40
  -6  23  -1   -3.30    3.80
  -6  23  -1    4.20    3.70
  -6 -24   1   -5.80    3.70
  -6 -24   1   -2.20    2.80
   6 -24  -1    2.40    4.30
   6 -24  -1   -3.90    4.30
  -6 -24   1   -2.40    2.70
   6 -24  -1   -7.30    3.90
   6  24  -1    3.20    3.40
  -6  24   1    5.80    4.10
   6  24  -1    3.90    5.20
  -6  24   1   -3.50    4.10
   5 -24  -1   18.40    5.10
  -5 -24   1   13.00    3.50
  -5 -24   1   11.00    4.30
   5 -24  -1   12.00    3.80
  -5 -24   1   12.20    4.50
   5 -24  -1   11.60    4.50
   5  24  -1   13.40    4.90
  -5  24   1    9.10    3.60
  -5  24   1   12.00    3.50
   5  24  -1   14.10    4.10
   5  24  -1   14.70    4.50
  -4 -24   1   -0.30    3.10
   4 -24  -1   -1.00    2.80
   4 -24  -1   -1.30    2.30
  -4 -24   1   -5.70    2.90
   4 -24  -1   -0.60    2.40
  -4 -24   1   -4.20    2.90
  -4  24   1    0.80    2.30
  -4  24   1   -1.40    2.00
  -4  24   1   -1.80    2.30
   4  24  -1   -2.20    3.50
   4  24  -1   -1.70    3.30
   4  24  -1   -5.80    2.90
  -4  24   1   -0.70    3.20
  -3 -24   1   28.20    4.00
   3 -24  -1   28.30    4.50
   3 -24  -1   24.40    4.00
   3 -24  -1   19.40    4.80
  -3 -24   1   27.40    4.10
  -3 -24   1   27.30    4.60
   3  24  -1   23.30    4.10
   3  24  -1   29.40    5.40
  -3  24   1   30.30    4.70
  -3  24   1   27.90    4.30
  -3  24   1   23.60    3.70
   3  24  -1   18.50    3.30
  -3  24   1   29.10    4.50
  -2 -24   1   27.30    3.60
   2 -24  -1   27.40    4.20
   2 -24  -1   29.00    3.70
  -2 -24   1   31.10    4.50
   2 -24  -1   27.10    3.20
   2 -24  -1   24.00    4.70
  -2 -24   1   27.50    3.90
  -2  24   1   22.20    3.80
   2  24  -1   35.70    4.90
   2  24  -1   26.80    3.70
  -2  24   1   26.80    4.10
   2  24  -1   24.50    4.40
  -2  24   1   30.70    4.20
  -2  24   1   26.10    4.00
   2  24  -1   23.70    3.10
   1 -24  -1   20.20    4.10
  -1 -24   1   17.80    2.90
   1 -24  -1   23.30    2.80
   1 -24  -1   19.80    3.40
  -1 -24   1   20.90    3.90
  -1 -24   1   21.00    3.30
   1 -24  -1   22.60    3.20
   1  24  -1   16.50    2.90
  -1  24   1   19.80    3.10
   1  24  -1   17.90    3.50
   1  24  -1   20.90    2.80
  -1  24   1   19.00    3.50
   1  24  -1   21.70    3.60
  -1  24   1   17.70    3.10
  -1  24   1   17.50    4.00
   0 -24  -1   69.79    4.40
   0 -24   1   63.29    5.60
   0 -24   1   64.79    4.70
   0 -24  -1   64.09    4.60
   0 -24  -1   59.99    5.00
   0 -24   1   59.79    4.40
   0  24  -1   66.99    4.00
   0  24   1   65.89    5.70
   0  24  -1   68.39    4.80
   0  24  -1   64.09    5.20
   0  24   1   65.99    4.70
   0  24  -1   72.69    4.60
   0  24   1   62.29    4.50
   0  24   1   62.39    4.30
  -1 -24  -1   20.20    3.00
   1 -24   1   20.30    3.00
   1 -24   1   16.50    3.20
   1 -24   1   12.20    3.90
  -1 -24  -1   11.10    3.60
   1 -24   1   21.00    3.20
  -1 -24  -1   15.90    3.00
   1  24   1   13.50    3.40
   1  24   1   15.20    2.50
  -1  24  -1   14.80    3.30
  -1  24  -1   21.70    4.00
  -1  24  -1   18.60    3.20
   1  24   1   19.80    3.80
   1  24   1   19.60    2.70
  -1  24  -1   16.00    3.20
   2 -24   1  379.46   15.70
  -2 -24  -1  373.96   15.00
   2 -24   1  357.76   14.90
   2 -24   1  400.56   15.70
  -2 -24  -1  374.86   14.90
  -2 -24  -1  399.16   14.70
   2 -24   1  381.36   17.30
  -2 -24  -1  378.16   16.10
  -2  24  -1  391.16   15.70
   2  24   1  392.66   15.30
  -2  24  -1  393.66   15.50
   2  24   1  381.26   15.90
  -2  24  -1  397.46   16.30
   2  24   1  395.06   17.10
  -2  24  -1  380.36   15.60
   3 -24   1    5.10    2.90
   3 -24   1    2.40    2.40
   3 -24   1   -3.10    2.40
  -3 -24  -1    5.80    3.40
  -3 -24  -1   -2.30    2.60
   3 -24   1   -1.20    2.30
  -3 -24  -1    4.30    2.90
   3 -24   1    1.50    2.20
  -3  24  -1   -0.10    2.40
  -3  24  -1    3.10    2.80
   3  24   1    3.20    3.00
  -3  24  -1    0.00    3.10
   3  24   1   -1.40    2.20
  -3  24  -1   -1.00    3.00
   3  24   1    3.00    2.60
   4 -24   1   -0.20    3.30
   4 -24   1    1.40    2.60
  -4 -24  -1   -1.30    3.00
   4 -24   1   -6.50    3.00
   4 -24   1    0.10    3.10
  -4 -24  -1    0.50    2.60
   4 -24   1    1.90    3.00
  -4 -24  -1    0.20    3.10
   4  24   1   -0.40    2.70
   4  24   1    1.40    3.30
  -4  24  -1    0.20    3.40
   4  24   1    1.50    3.30
  -4  24  -1   -3.00    3.00
  -4  24  -1   -3.60    3.10
   5 -24   1    1.60    3.20
  -5 -24  -1    2.40    3.60
  -5 -24  -1    1.40    4.20
  -5 -24  -1    1.10    3.70
   5 -24   1    0.70    3.00
   5 -24   1    4.50    5.10
   5  24   1    6.20    4.00
   5  24   1    2.50    3.30
  -5  24  -1    0.00    2.80
   5  24   1    8.40    4.60
  -5  24  -1    0.10    2.80
  -5  24  -1    6.80    3.90
  -6 -24  -1   -3.00    4.60
   6 -24   1    6.30    5.90
   6 -24   1   13.60    5.20
  -6 -24  -1    0.40    4.00
  -6 -24  -1    7.80    4.70
   6 -24   1    0.60    4.90
   6  24   1    1.60    5.00
  -6  24  -1   -0.70    4.20
  -6  24  -1   -6.60    4.10
   6  24   1    2.80    4.70
   6  24   1   11.70    5.40
  -6  24  -1    4.40    4.30
  -6 -25   1   -5.50    3.80
  -6 -25   1    2.60    4.00
   6 -25  -1   -6.30    4.20
   6 -25  -1   -0.60    4.70
   6 -25  -1   -2.90    4.60
  -6 -25   1   -1.10    3.00
  -6  25   1   -3.60    4.20
   6  25  -1   -6.40    4.10
  -6  25   1   -2.60    4.10
   6  25  -1   -6.20    4.50
  -5 -25   1   -0.10    2.80
   5 -25  -1   -4.60    3.90
  -5 -25   1   -0.80    3.50
  -5 -25   1    0.20    3.60
   5 -25  -1   -8.70    3.40
   5 -25  -1    3.10    4.30
   5  25  -1    5.50    4.10
  -5  25   1    5.20    3.10
   5  25  -1    3.40    4.20
  -5  25   1   -3.00    3.60
   5  25  -1    0.10    3.10
  -4 -25   1    5.20    3.40
  -4 -25   1    6.50    3.80
   4 -25  -1    0.50    3.90
   4 -25  -1    4.10    2.80
   4 -25  -1    1.40    3.70
  -4 -25   1    5.50    3.40
   4  25  -1    4.90    4.10
  -4  25   1    8.40    3.90
   4  25  -1    4.10    2.90
  -4  25   1    7.10    3.50
  -4  25   1    6.00    2.70
   4  25  -1    9.20    4.40
  -4  25   1    3.20    3.60
   3 -25  -1   31.10    5.60
   3 -25  -1   24.20    4.30
  -3 -25   1   21.50    3.80
  -3 -25   1   21.20    4.00
   3 -25  -1   23.40    4.00
  -3 -25   1   26.30    4.70
   3  25  -1   27.00    5.30
  -3  25   1   24.30    3.90
   3  25  -1   36.70    5.50
  -3  25   1   30.20    4.70
  -3  25   1   19.10    3.70
  -3  25   1   25.00    4.40
   3  25  -1   23.80    4.10
  -2 -25   1   90.69    5.80
  -2 -25   1   87.29    6.10
   2 -25  -1   98.79    6.50
   2 -25  -1   94.29    7.60
   2 -25  -1  100.69    6.70
  -2 -25   1  111.49    7.30
   2  25  -1   94.29    6.30
   2  25  -1   92.19    6.20
   2  25  -1  108.99    7.10
  -2  25   1   98.69    6.50
  -2  25   1   93.89    6.50
  -2  25   1   90.99    6.40
  -2  25   1   98.09    6.50
   2  25  -1   91.49    7.00
  -1 -25   1   -1.40    2.90
   1 -25  -1    2.40    2.20
   1 -25  -1   -0.40    1.80
   1 -25  -1   -1.70    2.70
   1 -25  -1    1.80    1.70
  -1 -25   1    0.70    2.40
   1  25  -1    1.10    3.30
  -1  25   1    2.90    2.50
  -1  25   1   -3.50    2.50
  -1  25   1   -0.50    2.20
   1  25  -1    2.60    2.80
  -1  25   1   -1.10    2.10
   1  25  -1    0.80    2.20
   0 -25  -1   32.10    3.40
   0 -25  -1   34.40    4.90
   0 -25  -1   30.90    3.80
   0 -25   1   31.00    3.70
   0 -25   1   30.70    3.60
   0 -25   1   30.70    4.90
   0  25  -1   32.80    4.00
   0  25   1   31.20    3.90
   0  25   1   29.90    4.30
   0  25   1   35.10    3.40
   0  25   1   36.70    4.00
   0  25  -1   34.60    4.00
   0  25  -1   35.40    5.00
  -1 -25  -1   16.20    4.10
   1 -25   1   20.10    2.90
   1 -25   1   13.50    3.20
  -1 -25  -1   16.30    3.00
   1 -25   1   17.90    3.20
   1 -25   1   13.30    4.20
  -1 -25  -1   21.00    3.10
  -1  25  -1   24.70    3.40
   1  25   1   21.40    3.00
   1  25   1   16.20    4.40
  -1  25  -1   17.20    3.20
  -1  25  -1   19.90    3.70
  -1  25  -1   17.80    3.20
   1  25   1   16.50    3.70
   2 -25   1   76.49    5.30
   2 -25   1   81.29    5.90
  -2 -25  -1   76.19    6.00
  -2 -25  -1   73.99    5.50
   2 -25   1   71.09    7.10
  -2 -25  -1   72.79    5.00
   2 -25   1   84.59    6.10
  -2  25  -1   79.69    6.00
   2  25   1   85.09    5.80
  -2  25  -1   81.89    5.60
   2  25   1   89.69    7.30
   2  25   1   91.99    6.80
  -2  25  -1   95.69    6.10
  -2  25  -1   81.49    5.90
  -3 -25  -1   28.20    4.90
   3 -25   1   25.10    3.70
   3 -25   1   24.50    4.00
  -3 -25  -1   23.00    4.00
  -3 -25  -1   32.10    4.30
   3 -25   1   20.40    5.40
   3 -25   1   30.80    4.80
   3  25   1   25.10    4.70
  -3  25  -1   23.20    4.50
   3  25   1   29.20    5.00
  -3  25  -1   24.00    4.40
  -3  25  -1   23.10    4.40
   3  25   1   28.60    4.40
  -3  25  -1   29.80    4.60
  -4 -25  -1    3.70    3.90
   4 -25   1    7.60    5.00
   4 -25   1   -0.40    2.80
   4 -25   1    9.00    4.00
  -4 -25  -1    6.60    3.50
   4 -25   1    4.20    3.00
   4 -25   1    8.10    3.60
  -4 -25  -1    6.10    3.50
   4  25   1    2.20    2.90
  -4  25  -1    9.70    4.00
   4  25   1    8.60    3.10
   4  25   1   12.60    4.30
  -4  25  -1    7.00    3.80
  -4  25  -1    6.80    3.70
   5 -25   1   28.00    5.80
   5 -25   1   25.20    6.10
   5 -25   1   23.50    4.90
  -5 -25  -1   30.10    5.30
  -5 -25  -1   32.30    6.30
  -5 -25  -1   36.80    5.40
  -5  25  -1   40.20    6.10
   5  25   1   27.00    6.20
  -5  25  -1   27.20    5.20
   5  25   1   35.40    5.90
  -5  25  -1   18.70    4.50
   6 -26  -1    2.80    4.70
  -6 -26   1    3.80    4.80
   6 -26  -1   -3.60    4.80
   6 -26  -1    6.10    5.40
  -6 -26   1    6.60    4.50
  -6 -26   1    2.70    3.40
  -6  26   1    6.70    4.70
   6  26  -1    9.20    6.00
  -6  26   1    3.60    3.60
   6  26  -1    6.80    4.80
   5 -26  -1    1.00    4.20
  -5 -26   1    2.90    3.90
   5 -26  -1    7.20    4.80
  -5 -26   1    7.30    3.90
  -5 -26   1    7.70    4.40
   5 -26  -1   -0.50    4.30
   5  26  -1   12.30    5.20
   5  26  -1   -0.60    3.80
   5  26  -1    2.10    3.60
  -5  26   1    0.00    3.80
  -5  26   1    2.90    4.20
  -4 -26   1   -0.10    2.30
   4 -26  -1    5.20    3.20
  -4 -26   1   -1.20    3.20
  -4 -26   1    0.40    3.50
   4 -26  -1    2.80    2.80
  -4  26   1    0.00    2.60
  -4  26   1    3.90    3.50
  -4  26   1    2.60    3.50
   4  26  -1    4.40    4.10
   4  26  -1    4.50    3.50
  -4  26   1    1.80    3.50
   4  26  -1    1.90    4.30
  -3 -26   1   12.30    4.10
  -3 -26   1    8.90    3.30
   3 -26  -1    2.50    3.40
   3 -26  -1   13.60    4.70
   3 -26  -1    5.90    3.60
  -3 -26   1   14.80    3.60
  -3  26   1    8.30    3.80
  -3  26   1    5.10    3.50
  -3  26   1   15.30    4.10
   3  26  -1   15.50    3.70
   3  26  -1   16.60    4.40
   3  26  -1   15.00    4.80
  -3  26   1   10.20    4.00
  -2 -26   1   40.40    4.50
  -2 -26   1   49.30    5.60
   2 -26  -1   39.60    5.90
  -2 -26   1   29.20    4.00
   2 -26  -1   35.60    4.50
   2 -26  -1   30.50    4.50
   2  26  -1   34.10    4.60
  -2  26   1   32.60    4.70
   2  26  -1   32.60    5.20
  -2  26   1   32.60    4.40
  -2  26   1   37.80    4.40
  -2  26   1   34.30    4.50
   2  26  -1   33.00    4.10
  -1 -26   1   -0.50    2.30
   1 -26  -1   -1.30    2.50
   1 -26  -1   -1.40    2.70
   1 -26  -1    4.40    1.90
  -1 -26   1    0.90    2.40
   1 -26  -1    1.90    2.50
  -1  26   1   -0.20    2.40
  -1  26   1    2.20    2.20
  -1  26   1   -0.50    2.60
   1  26  -1    2.30    2.40
   1  26  -1    1.40    2.90
   1  26  -1    7.50    3.70
   0 -26   1   -0.60    2.70
   0 -26  -1   -0.10    2.30
   0 -26   1   -3.10    3.00
   0 -26  -1    0.30    1.90
   0 -26  -1    3.40    3.20
   0 -26   1   -1.00    2.10
   0  26   1    0.70    2.50
   0  26   1   -0.20    2.30
   0  26  -1   -1.20    2.50
   0  26   1    2.40    2.00
   0  26   1    2.20    3.40
   0  26  -1    0.50    3.20
  -1 -26  -1   10.30    2.70
   1 -26   1   10.10    3.30
   1 -26   1    4.60    2.70
  -1 -26  -1    6.00    3.50
  -1 -26  -1    9.50    2.70
   1 -26   1    5.50    3.70
   1 -26   1   11.00    2.70
  -1  26  -1    8.70    3.80
  -1  26  -1    7.90    2.90
   1  26   1   10.60    3.40
   1  26   1    8.10    3.60
   1  26   1    4.20    2.30
  -1  26  -1    8.30    3.20
   2 -26   1    5.40    3.90
  -2 -26  -1    2.20    2.00
   2 -26   1   -0.40    2.80
   2 -26   1   -1.70    2.70
   2 -26   1   -0.10    2.10
  -2 -26  -1    3.00    2.60
  -2 -26  -1   -0.30    2.50
   2  26   1   -0.20    3.40
  -2  26  -1    4.90    3.30
   2  26   1    2.50    2.70
  -2  26  -1    6.40    3.60
  -2  26  -1   -2.80    2.60
   2  26   1    3.60    2.70
  -2  26  -1    3.60    3.10
   3 -26   1   25.40    4.70
  -3 -26  -1   25.60    4.20
  -3 -26  -1   27.60    4.30
  -3 -26  -1   33.60    5.40
   3 -26   1   32.70    6.20
   3 -26   1   27.40    4.00
   3 -26   1   28.00    4.30
   3  26   1   34.60    5.30
  -3  26  -1   23.40    4.50
  -3  26  -1   36.10    4.70
   3  26   1   29.40    5.30
  -3  26  -1   22.30    4.50
   3  26   1   29.90    4.50
  -3  26  -1   29.60    4.80
  -4 -26  -1    4.30    2.70
   4 -26   1    1.40    2.80
   4 -26   1    3.10    4.70
   4 -26   1    9.80    3.80
   4 -26   1    3.20    4.00
  -4 -26  -1    1.30    3.40
  -4 -26  -1    2.90    4.00
   4  26   1    3.10    4.30
  -4  26  -1    6.70    3.20
  -4  26  -1    9.50    4.00
   4  26   1    3.70    3.60
  -4  26  -1    4.00    3.80
   4  26   1    5.40    4.10
   5 -26   1    1.10    4.40
  -5 -26  -1    5.30    3.80
  -5 -26  -1    8.60    3.30
  -5 -26  -1   10.30    3.60
   5 -26   1    2.40    4.90
   5 -26   1    1.80    4.20
  -5  26  -1    6.50    4.20
   5  26   1    5.30    3.50
  -5  26  -1   14.10    4.60
  -5  26  -1    5.80    4.50
   5  26   1    5.40    5.30
  -5 -27   1    0.40    3.90
  -5 -27   1    1.10    2.70
  -5 -27   1   -4.60    3.80
   5 -27  -1    0.80    4.30
   5 -27  -1    1.40    3.60
   5 -27  -1    4.30    4.50
  -5  27   1   -1.00    4.00
   5  27  -1    3.10    4.20
   5  27  -1    4.00    4.70
  -5  27   1    3.60    4.20
   5  27  -1    1.30    3.40
  -4 -27   1   22.00    4.50
   4 -27  -1   24.00    4.60
   4 -27  -1   14.90    5.50
   4 -27  -1   17.80    4.80
  -4 -27   1   22.90    4.60
  -4 -27   1   15.50    4.10
   4  27  -1   19.00    4.60
  -4  27   1   27.40    5.00
   4  27  -1   18.20    5.50
  -4  27   1   19.10    4.80
   4  27  -1   21.30    4.60
  -4  27   1   18.90    4.90
  -3 -27   1   22.60    4.90
   3 -27  -1   24.10    5.60
  -3 -27   1   21.00    4.10
  -3 -27   1   21.00    4.00
   3 -27  -1   17.10    4.30
   3 -27  -1   32.20    5.20
  -3  27   1   19.00    4.70
   3  27  -1   25.90    5.60
   3  27  -1   25.60    4.30
  -3  27   1   29.80    4.80
  -3  27   1   32.40    4.90
   3  27  -1   27.60    4.60
  -3  27   1   25.20    4.70
   2 -27  -1   81.79    7.40
   2 -27  -1   85.19    6.40
   2 -27  -1   81.39    6.00
  -2 -27   1   80.49    5.80
  -2 -27   1   93.59    7.10
  -2 -27   1   69.99    5.30
   2  27  -1   79.29    5.50
  -2  27   1   72.39    6.00
   2  27  -1   75.89    6.40
  -2  27   1   78.59    5.70
  -2  27   1   85.09    7.10
   2  27  -1   68.49    6.40
  -2  27   1   73.99    5.40
   1 -27  -1   50.29    5.90
  -1 -27   1   48.40    6.00
  -1 -27   1   47.70    4.00
   1 -27  -1   45.50    4.20
   1 -27  -1   40.20    3.60
   1  27  -1   42.40    5.60
   1  27  -1   47.30    4.70
  -1  27   1   48.80    5.10
  -1  27   1   49.80    6.20
  -1  27   1   42.50    4.30
   1  27  -1   51.19    5.30
   0 -27  -1    1.50    2.50
   0 -27   1    3.70    3.70
   0 -27   1   -1.40    2.20
   0 -27  -1    1.30    2.40
   0 -27  -1   -1.20    1.90
   0  27   1    0.60    2.40
   0  27  -1   -4.80    3.20
   0  27   1    0.20    2.60
   0  27   1    0.60    2.00
   0  27   1    5.40    3.90
   0  27  -1   -2.70    2.40
   1 -27   1  106.79    7.70
  -1 -27  -1  121.89    6.40
   1 -27   1  107.09    6.60
   1 -27   1   99.29    6.10
  -1 -27  -1  108.59    7.20
  -1 -27  -1  111.59    5.90
  -1  27  -1  100.69    7.10
   1  27   1  104.69    7.10
   1  27   1  112.79    8.30
  -1  27  -1  112.99    6.50
   2 -27   1    8.40    4.30
  -2 -27  -1    8.40    3.00
   2 -27   1   13.20    3.60
   2 -27   1    9.70    3.50
  -2 -27  -1   10.80    4.00
   2 -27   1   12.20    3.00
  -2  27  -1   11.10    3.50
  -2  27  -1    5.30    3.70
  -2  27  -1    8.80    3.40
   2  27   1   10.60    3.70
   2  27   1    9.10    4.10
  -2  27  -1   10.70    3.80
  -3 -27  -1    4.90    3.90
   3 -27   1    9.70    4.90
  -3 -27  -1    8.10    2.60
  -3 -27  -1    7.80    3.40
   3 -27   1    7.20    2.90
   3 -27   1    7.00    3.80
   3 -27   1   12.30    3.20
  -3  27  -1    9.40    3.90
   3  27   1    4.20    3.40
   3  27   1   10.40    3.80
  -3  27  -1    7.40    3.80
  -3  27  -1   11.70    4.10
  -3  27  -1   14.40    4.10
   3  27   1   12.00    3.60
  -4 -27  -1    7.20    3.00
   4 -27   1    5.80    3.40
  -4 -27  -1    9.90    3.90
   4 -27   1    3.90    3.20
   4 -27   1   14.90    4.80
  -4 -27  -1    8.30    4.50
  -4  27  -1    6.00    3.20
  -4  27  -1    7.50    4.20
   4  27   1   14.20    5.00
   4  27   1    7.70    4.60
   4  27   1    7.10    4.00
   5 -27   1   -6.70    2.70
   5 -27   1    1.10    5.10
   5 -27   1   -7.10    4.00
  -5 -27  -1    1.90    3.40
  -5 -27  -1   -2.30    3.50
  -5 -27  -1    4.10    3.20
  -5  27  -1   -3.40    3.70
   5  27   1   -5.90    4.40
   5  27   1   -4.20    3.90
  -5  27  -1   -1.80    3.90
  -5  27  -1    1.00    4.10
   5 -28  -1   13.60    5.10
   5 -28  -1    9.60    5.00
   5 -28  -1   10.40    6.00
  -5 -28   1    7.00    3.50
  -5 -28   1   17.40    4.60
  -5 -28   1   16.60    5.30
  -5  28   1   12.40    4.80
   5  28  -1   17.80    5.00
   5  28  -1   12.60    4.70
  -5  28   1   17.90    4.30
   5  28  -1    8.90    5.50
   4 -28  -1    1.60    2.80
   4 -28  -1   -1.10    3.10
  -4 -28   1   -1.70    3.30
  -4 -28   1   -0.80    3.30
   4 -28  -1   -2.20    3.50
  -4 -28   1    1.00    2.90
   4  28  -1    2.90    3.30
   4  28  -1    3.40    3.80
  -4  28   1   -2.30    3.40
   4  28  -1   -3.90    3.80
  -4  28   1    1.80    3.80
  -4  28   1   -1.50    3.60
   3 -28  -1    5.30    3.70
   3 -28  -1    5.50    3.40
  -3 -28   1    4.30    3.20
  -3 -28   1    6.10    3.30
  -3 -28   1    2.00    3.50
   3 -28  -1    2.50    3.50
  -3  28   1    6.40    3.70
  -3  28   1    5.50    4.00
   3  28  -1    5.50    4.70
   3  28  -1    5.90    3.30
  -3  28   1    1.20    2.60
   3  28  -1    6.10    4.10
  -3  28   1    5.50    3.70
   2 -28  -1  109.99    7.50
  -2 -28   1  111.99    6.60
   2 -28  -1  103.39    7.00
   2 -28  -1  111.09    8.30
  -2 -28   1  109.19    7.50
  -2  28   1  122.39    7.20
  -2  28   1  113.99    7.50
   2  28  -1  123.49    8.00
   2  28  -1  125.79    9.30
  -2  28   1  119.49    8.40
  -2  28   1  103.49    7.10
  -1 -28   1    1.60    3.30
   1 -28  -1   -0.80    3.40
  -1 -28   1    2.40    2.70
   1 -28  -1   -0.90    2.80
   1  28  -1    3.60    3.00
  -1  28   1    0.60    2.60
  -1  28   1   -1.90    3.50
  -1  28   1    1.90    3.00
   1  28  -1    3.00    2.50
   1  28  -1    3.10    4.00
   0 -28  -1   31.30    5.30
   0 -28  -1   27.60    3.50
   0 -28   1   24.90    3.70
   0 -28  -1   28.00    3.80
   0 -28   1   30.50    4.90
   0  28   1   27.90    3.90
   0  28   1   36.90    4.70
   0  28   1   28.60    4.80
   0  28  -1   25.10    5.10
   0  28  -1   25.40    4.20
  -1 -28  -1   20.60    3.00
  -1 -28  -1   21.00    4.50
   1 -28   1   21.60    3.40
   1 -28   1   19.90    4.90
   1 -28   1   16.30    3.40
  -1  28  -1   20.30    4.90
   1  28   1   23.40    4.40
   1  28   1   15.70    4.10
  -1  28  -1   16.40    4.00
   2 -28   1   -5.10    3.20
  -2 -28  -1    0.80    2.70
  -2 -28  -1    6.60    3.80
   2 -28   1    1.10    2.20
   2 -28   1   -2.60    2.70
   2 -28   1   -4.70    3.20
  -2  28  -1    2.50    2.70
  -2  28  -1   -2.30    2.80
   2  28   1    5.00    4.20
  -2  28  -1   -1.10    2.50
   2  28   1    0.20    2.60
  -2  28  -1   -6.00    2.50
   3 -28   1   -6.60    3.20
  -3 -28  -1   -0.10    3.00
   3 -28   1   -4.20    2.80
  -3 -28  -1    2.40    2.30
   3 -28   1   -0.60    4.00
  -3 -28  -1   -2.20    3.40
  -3  28  -1   -3.70    3.20
   3  28   1   -3.50    3.90
  -3  28  -1    2.20    3.50
   3  28   1    3.80    4.00
   3  28   1   -1.90    3.00
  -3  28  -1    1.50    2.60
  -3  28  -1   -8.40    2.90
  -4 -28  -1    9.60    4.60
   4 -28   1    6.80    5.10
  -4 -28  -1   11.00    3.30
  -4 -28  -1    1.20    3.40
   4 -28   1    5.40    3.40
   4 -28   1    4.10    4.10
   4  28   1    4.30    4.00
  -4  28  -1    3.70    4.10
   4  28   1    8.90    3.90
   4  28   1    7.10    4.70
  -4  28  -1   14.80    4.60
  -5 -28  -1    1.60    3.10
   5 -28   1    2.70    5.10
  -5 -28  -1    1.40    3.90
   5 -28   1    3.00    4.80
  -5 -28  -1   -3.70    4.20
   5 -28   1    2.40    4.80
   5  28   1    0.50    4.40
   5  28   1    1.60    3.80
  -5  28  -1   -1.00    3.10
  -5  28  -1    7.50    4.70
  -5  28  -1   -6.30    3.70
  -5 -29   1   14.80    4.00
  -5 -29   1   15.60    5.40
   5 -29  -1   13.40    5.30
   5 -29  -1    9.30    5.20
  -5 -29   1   14.70    4.70
   5 -29  -1   11.60    6.30
   5  29  -1   21.40    6.20
   5  29  -1   16.70    5.20
  -5  29   1    6.90    4.80
   5  29  -1   20.20    5.50
  -5  29   1   12.70    5.00
  -4 -29   1    1.10    3.80
   4 -29  -1   -5.10    3.40
  -4 -29   1    4.90    3.70
  -4 -29   1    4.30    3.50
   4 -29  -1    5.00    3.90
   4 -29  -1    2.70    4.10
  -4  29   1    4.60    3.30
  -4  29   1   -2.20    3.70
   4  29  -1   -1.70    4.40
   4  29  -1    2.80    3.70
  -4  29   1    0.20    3.80
   4  29  -1   11.10    4.90
   3 -29  -1    7.30    3.90
  -3 -29   1    6.20    3.20
   3 -29  -1    5.80    3.80
  -3 -29   1    4.90    3.90
  -3 -29   1    5.90    3.50
   3 -29  -1    1.10    3.10
  -3  29   1    8.60    3.90
   3  29  -1   -2.90    3.90
  -3  29   1    5.70    4.10
  -3  29   1    9.00    3.90
   3  29  -1    5.40    3.50
   3  29  -1   10.80    5.00
  -3  29   1    2.10    2.90
   2 -29  -1   34.70    5.70
  -2 -29   1   31.50    4.90
   2 -29  -1   32.70    4.90
   2 -29  -1   34.70    4.60
  -2 -29   1   34.20    4.10
  -2  29   1   34.20    5.90
   2  29  -1   28.90    4.50
   2  29  -1   39.60    6.70
  -2  29   1   36.10    5.20
  -2  29   1   37.10    4.60
  -2  29   1   35.50    5.70
  -1 -29   1    2.50    2.70
  -1 -29   1    0.30    2.60
   1 -29  -1   -2.10    2.50
   1 -29  -1    3.40    3.00
   1  29  -1    5.80    4.30
   1  29  -1    2.90    3.10
   1  29  -1   -1.90    2.40
  -1  29   1    0.10    2.80
  -1  29   1   -0.40    2.50
  -1  29   1   -2.10    3.00
   0 -29  -1   20.20    3.30
   0 -29  -1   29.30    4.10
   0 -29   1   30.10    4.00
   0 -29   1   21.80    5.00
   0 -29  -1   22.80    4.40
   0  29   1   20.70    3.70
   0  29  -1   31.00    5.00
   0  29  -1   28.10    4.30
   0  29   1   17.80    5.00
  -1 -29  -1    6.80    3.80
   1 -29   1   11.10    2.90
  -1 -29  -1    6.60    2.70
   1 -29   1    5.90    4.10
   1 -29   1    6.50    3.00
  -1  29  -1    5.70    3.50
   1  29   1    6.50    3.60
   1  29   1    4.10    4.20
  -1  29  -1    2.70    3.10
  -2 -29  -1   35.10    4.50
   2 -29   1   36.30    5.00
   2 -29   1   39.70    4.60
  -2 -29  -1   41.90    6.20
   2 -29   1   37.70    6.70
   2 -29   1   38.00    4.90
  -2  29  -1   39.70    5.40
  -2  29  -1   43.60    6.10
  -2  29  -1   37.40    4.90
  -2  29  -1   30.40    4.70
   2  29   1   43.70    6.80
   2  29   1   39.10    5.90
   3 -29   1   -6.70    2.40
   3 -29   1    1.40    3.50
  -3 -29  -1   -3.70    3.50
   3 -29   1   -3.80    3.40
  -3 -29  -1    6.20    2.60
  -3  29  -1   -1.70    3.30
   3  29   1   -3.20    3.90
   3  29   1    1.40    3.50
  -3  29  -1   -1.70    3.60
  -3  29  -1   -3.60    3.30
  -3  29  -1   -0.50    3.40
   3  29   1   -1.00    2.70
   4 -29   1   -6.00    3.50
  -4 -29  -1    0.30    3.50
  -4 -29  -1    1.60    2.70
   4 -29   1   -1.00    4.50
   4 -29   1   -1.20    2.80
  -4 -29  -1   -1.80    4.10
  -4  29  -1    0.60    3.80
   4  29   1    2.00    4.40
  -4  29  -1   -4.40    2.50
   4  29   1   -2.30    3.50
   4  29   1   -4.30    4.10
   5 -29   1    3.80    4.30
  -5 -29  -1    6.80    3.40
  -5 -29  -1    7.00    4.00
   5 -29   1   -3.70    4.40
  -5 -29  -1    1.80    4.90
   5 -29   1   -3.10    4.30
   5  29   1    3.00    5.10
  -5  29  -1    2.40    4.60
  -5  29  -1    0.60    4.30
  -5  29  -1    8.50    4.00
   5  29   1   -0.70    4.20
  -5 -30   1    5.60    3.50
   5 -30  -1   -0.60    4.50
   5 -30  -1    5.70    4.90
  -5 -30   1    9.80    4.10
  -5 -30   1    7.80    5.10
   5 -30  -1    6.30    5.90
  -5  30   1    6.90    4.90
  -5  30   1    5.60    4.90
   5  30  -1    6.30    5.30
   5  30  -1    7.50    3.70
   5  30  -1   10.50    5.70
  -4 -30   1   10.20    4.00
   4 -30  -1   -1.70    4.40
   4 -30  -1    0.70    4.00
  -4 -30   1    4.00    4.10
  -4 -30   1   -1.90    3.10
   4 -30  -1    0.50    3.90
  -4  30   1    4.30    4.10
  -4  30   1   -1.00    2.90
  -4  30   1    3.30    4.30
   4  30  -1    6.90    5.10
   4  30  -1    3.00    2.80
   4  30  -1    8.40    4.90
   3 -30  -1    2.10    3.60
   3 -30  -1    0.70    4.00
  -3 -30   1   -5.90    3.40
   3 -30  -1    4.20    3.70
  -3 -30   1   -2.80    3.00
  -3  30   1   -1.70    3.10
  -3  30   1   -0.20    3.60
  -3  30   1   -6.80    3.40
  -3  30   1   -0.30    4.00
   3  30  -1   -4.10    2.50
   3  30  -1    1.80    4.60
   3  30  -1   -2.20    3.50
   2 -30  -1  162.78    9.30
  -2 -30   1  148.79    8.40
  -2 -30   1  145.79    9.90
   2 -30  -1  150.78   10.60
  -2  30   1  155.08   10.10
   2  30  -1  155.88    9.40
  -2  30   1  145.69    8.40
   2  30  -1  159.98   11.00
  -2  30   1  138.29    8.80
  -1 -30   1   57.19    6.60
   1 -30  -1   49.70    7.00
   1 -30  -1   48.40    5.50
  -1 -30   1   50.69    4.30
   1  30  -1   47.40    5.10
   1  30  -1   47.60    6.40
  -1  30   1   51.29    6.70
  -1  30   1   46.10    6.80
  -1  30   1   47.60    5.50
   1  30  -1   43.90    6.50
   0 -30   1    2.70    2.60
   0 -30  -1   -3.00    3.30
   0 -30  -1    3.80    2.80
   0 -30   1   -1.80    2.60
   0 -30  -1    0.30    2.30
   0  30  -1    2.10    4.00
   0  30  -1   -4.40    2.60
   0  30   1    0.40    3.00
   0  30   1   -1.40    2.50
  -1 -30  -1   16.50    3.40
   1 -30   1   12.30    4.80
   1 -30   1   11.80    3.20
  -1 -30  -1   12.50    4.30
  -1  30  -1   10.00    3.10
   1  30   1   10.70    4.00
  -1  30  -1   10.80    4.80
   1  30   1   11.50    4.80
   2 -30   1    5.30    2.70
   2 -30   1    5.00    4.40
   2 -30   1   -1.30    2.90
  -2 -30  -1    4.70    4.10
  -2 -30  -1    7.50    3.00
   2  30   1    3.50    3.60
  -2  30  -1    4.80    3.60
   2  30   1    3.20    2.90
  -2  30  -1    6.60    4.30
   3 -30   1   -0.20    3.20
  -3 -30  -1    7.40    2.80
   3 -30   1    0.40    3.50
  -3 -30  -1    0.90    4.00
   3 -30   1    3.50    3.90
   3  30   1    1.50    4.30
  -3  30  -1    3.90    3.70
   3  30   1    6.20    4.50
  -3  30  -1    4.10    3.70
  -3  30  -1    1.90    3.90
  -3  30  -1   -1.20    3.70
  -4 -30  -1    0.20    4.40
   4 -30   1    3.20    5.20
   4 -30   1   -2.30    4.00
  -4 -30  -1    3.70    3.80
   4 -30   1   -4.00    4.00
  -4 -30  -1   -3.00    2.20
  -4  30  -1   -7.70    3.80
   4  30   1    0.10    4.30
   4  30   1   -1.50    3.70
   4  30   1   -1.90    3.10
  -4  30  -1   -1.80    4.10
   4 -31  -1   49.00    6.80
  -4 -31   1   32.80    5.50
   4 -31  -1   37.00    7.90
  -4 -31   1   40.50    6.80
   4 -31  -1   30.40    6.00
  -4 -31   1   40.10    5.70
  -4  31   1   41.80    6.70
   4  31  -1   41.70    6.50
   4  31  -1   36.50    5.80
  -4  31   1   43.00    6.50
   4  31  -1   43.40    7.80
  -4  31   1   33.90    5.90
   3 -31  -1   11.10    4.30
   3 -31  -1    5.10    4.80
  -3 -31   1   10.60    4.70
   3 -31  -1    6.40    3.80
  -3 -31   1    7.00    3.70
  -3  31   1   -5.60    3.70
   3  31  -1    3.50    4.50
   3  31  -1    6.30    3.90
  -3  31   1    4.80    4.30
  -3  31   1    6.00    3.80
   2 -31  -1   58.79    7.90
  -2 -31   1   50.69    5.40
  -2 -31   1   53.29    7.00
   2 -31  -1   41.80    5.60
  -2  31   1   43.90    6.10
   2  31  -1   44.20    6.40
  -2  31   1   51.49    6.10
   2  31  -1   41.30    6.00
  -2  31   1   39.20    5.00
  -1 -31   1   58.59    6.70
   1 -31  -1   57.59    5.60
  -1 -31   1   65.79    5.50
   1 -31  -1   58.49    7.60
   1  31  -1   70.29    5.40
   1  31  -1   71.49    7.40
  -1  31   1   60.09    7.50
  -1  31   1   51.79    4.80
   0 -31  -1    8.30    3.60
   0 -31   1   12.60    2.80
   0 -31   1    7.10    4.40
   0  31   1    4.10    4.50
   0  31  -1    6.80    3.80
   0  31  -1    6.00    3.40
   0  31   1    6.70    3.00
  -1 -31  -1   23.40    4.50
  -1 -31  -1   19.40    3.60
   1 -31   1   19.70    3.70
   1 -31   1   22.80    4.90
  -1  31  -1   25.40    4.80
   1  31   1   22.50    4.70
  -1  31  -1   18.70    5.30
   1  31   1   30.50    6.20
  -2 -31  -1   12.20    3.50
   2 -31   1    8.70    4.90
   2 -31   1    5.00    3.40
  -2 -31  -1    7.40    4.40
  -2  31  -1    4.20    3.80
  -2  31  -1    6.60    3.50
   2  31   1   11.50    5.30
   2  31   1    5.50    4.10
   3 -31   1   -2.10    3.40
  -3 -31  -1   -2.20    3.90
   3 -31   1    4.20    3.80
  -3 -31  -1   -4.00    2.80
   3 -31   1   -4.50    3.20
  -3  31  -1    2.80    3.70
  -3  31  -1    2.80    4.10
   3  31   1   -1.00    4.60
  -3  31  -1   -1.40    2.70
   3  31   1   -3.60    3.90
  -4 -31  -1    9.10    4.00
  -4 -31  -1    3.20    4.80
   4 -31   1    5.50    4.50
   4 -31   1    3.10    4.50
   4 -31   1    7.80    5.60
  -4 -31  -1    0.90    4.40
  -4  31  -1    6.80    3.70
   4  31   1    1.70    4.70
   4  31   1   12.80    5.50
  -4  31  -1   -1.30    4.10
   4  31   1   -0.30    4.00
  -4 -32   1    1.20    4.40
  -4 -32   1    1.10    5.60
  -4 -32   1    8.50    4.30
   4 -32  -1    3.10    3.10
   4 -32  -1    3.80    5.20
   4 -32  -1   -1.30    4.20
  -4  32   1    2.90    4.30
   4  32  -1    0.30    5.00
  -4  32   1    5.40    4.80
   4  32  -1    0.90    4.20
  -4  32   1    4.70    4.80
   4  32  -1   -1.80    4.70
  -3 -32   1    9.90    4.80
   3 -32  -1   -1.50    3.50
   3 -32  -1   -5.40    3.90
   3 -32  -1    8.70    4.30
  -3 -32   1    4.70    3.60
  -3  32   1   -7.20    3.70
  -3  32   1   -5.30    2.90
   3  32  -1    0.20    3.50
   3  32  -1    4.00    4.60
  -3  32   1    4.60    4.30
   2 -32  -1   33.60    6.70
   2 -32  -1   34.30    5.40
  -2 -32   1   38.00    6.30
  -2 -32   1   38.70    5.10
  -2  32   1   30.80    4.70
   2  32  -1   35.20    6.30
  -2  32   1   40.70    6.80
   2  32  -1   26.80    5.50
  -2  32   1   31.00    5.00
   1 -32  -1    3.30    3.10
   1 -32  -1    2.90    3.40
  -1 -32   1    7.60    4.30
  -1 -32   1    5.10    3.00
  -1  32   1    9.80    3.80
  -1  32   1    2.40    4.40
   1  32  -1    6.60    5.00
   0 -32   1    4.20    2.80
   0 -32   1   -0.30    2.90
   0 -32  -1    0.40    3.80
   0  32   1    1.60    2.90
   0  32  -1    5.10    4.50
   0  32  -1   -0.60    3.10
   0  32   1    3.70    4.40
  -1 -32  -1   16.10    4.90
   1 -32   1   13.20    3.40
   1 -32   1   17.80    5.30
  -1 -32  -1   17.60    3.60
  -1  32  -1   13.50    5.30
   1  32   1   14.70    4.40
  -1  32  -1    7.10    3.10
   1  32   1   17.10    5.50
  -2 -32  -1   39.20    6.70
  -2 -32  -1   28.00    4.50
   2 -32   1   42.50    7.20
   2 -32   1   37.40    6.40
  -2  32  -1   39.10    6.40
   2  32   1   39.10    7.20
   2  32   1   30.50    5.60
  -2  32  -1   30.70    5.50
  -3 -32  -1   -1.10    4.10
   3 -32   1    1.10    3.80
  -3 -32  -1   -5.10    2.90
   3 -32   1   -2.40    3.10
   3  32   1   -0.60    4.40
  -3  32  -1    5.60    4.30
  -3  32  -1    5.20    4.30
  -3  32  -1   -1.70    3.70
   3  32   1   -2.60    3.20
  -4 -32  -1    0.00    3.60
   4 -32   1   -4.60    5.00
   4 -32   1   -2.10    4.20
  -4 -32  -1    2.60    4.70
   4  32   1    4.50    5.10
  -4  32  -1    0.90    4.70
   4  32   1    6.20    5.40
  -4  32  -1    2.30    4.40
  -4 -33   1    0.20    2.90
  -4 -33   1    1.90    3.60
   4 -33  -1    2.00    5.30
   4 -33  -1    8.80    4.70
   4 -33  -1    4.40    4.50
  -4  33   1   -1.40    4.30
   4  33  -1    8.60    5.80
   4  33  -1    6.40    5.50
  -4  33   1    4.40    3.90
  -4  33   1    0.00    5.10
   3 -33  -1   -1.50    4.70
  -3 -33   1    6.90    4.00
  -3 -33   1    6.80    4.80
   3 -33  -1   -0.20    3.80
  -3  33   1    2.30    4.80
  -3  33   1    7.00    3.60
   3  33  -1    2.40    3.40
   3  33  -1    7.10    5.30
   2 -33  -1   44.20    6.90
  -2 -33   1   37.30    5.30
   2 -33  -1   27.00    5.30
  -2 -33   1   41.00    6.00
   2  33  -1   37.40    6.00
  -2  33   1   45.50    6.10
  -2  33   1   47.40    7.10
   2  33  -1   43.60    7.80
   1 -33  -1   18.10    4.20
   1 -33  -1   12.60    5.30
  -1 -33   1   16.20    5.30
  -1 -33   1   15.90    3.80
   1  33  -1   18.40    5.00
  -1  33   1   16.80    4.50
  -1  33   1   17.00    4.30
   0 -33   1   -0.10    2.50
   0 -33  -1   -6.10    3.40
   0 -33   1   -5.40    3.60
   0  33  -1   -2.90    3.00
   0  33   1    0.70    4.50
   0  33  -1    0.00    3.30
   1 -33   1    5.40    3.00
   1 -33   1    0.40    4.30
  -1 -33  -1    4.70    4.10
   1  33   1   10.00    5.50
  -1  33  -1   -0.40    4.30
   1  33   1    2.60    3.70
  -1  33  -1    7.40    4.00
   2 -33   1    3.10    3.60
  -2 -33  -1   -0.80    3.00
  -2 -33  -1    7.30    4.60
  -2  33  -1    1.80    2.90
   2  33   1    4.60    4.30
   2  33   1    0.80    3.70
  -2  33  -1   -5.70    3.90
  -3 -33  -1   -3.40    3.20
   3 -33   1   -2.40    3.50
  -3 -33  -1    2.20    4.40
   3 -33   1   -4.10    4.10
   3  33   1    0.70    4.80
  -3  33  -1   -1.40    4.20
   3  33   1   -1.90    4.40
  -3  33  -1   -4.10    4.00
  -3 -34   1   13.60    4.50
   3 -34  -1   13.10    4.80
   3 -34  -1   14.80    6.10
  -3 -34   1   19.00    3.90
  -3  34   1   14.50    5.90
  -3  34   1   15.20    5.30
   3  34  -1   14.90    6.40
   3  34  -1    9.80    5.20
  -2 -34   1    5.60    4.50
   2 -34  -1    3.90    4.70
  -2 -34   1    4.20    2.70
   2 -34  -1    5.10    3.80
  -2  34   1    5.60    4.40
   2  34  -1   -0.50    5.00
   2  34  -1    4.80    5.40
  -2  34   1    4.10    4.90
   1 -34  -1    9.00    3.80
  -1 -34   1    8.00    3.90
  -1 -34   1    7.30    2.80
  -1  34   1    8.80    3.90
  -1  34   1   10.00    5.30
   1  34  -1   17.00    5.90
   0 -34  -1    7.70    4.60
   0 -34   1    6.00    3.80
   0 -34   1    6.40    3.20
   0  34  -1    2.50    3.50
   0  34  -1    1.90    4.80
   0  34   1   12.70    5.60
  -1 -34  -1    1.20    3.90
   1 -34   1    2.30    3.60
  -1  34  -1   -3.70    2.80
   1  34   1   -3.40    4.50
  -1  34  -1   -6.50    3.40
  -2 -34  -1    9.60    4.10
  -2 -34  -1   11.50    3.90
   2 -34   1   11.50    4.60
   2  34   1   15.70    5.10
  -2  34  -1    6.00    4.80
  -2  34  -1    6.60    4.50
   2  34   1   14.20    5.90
  -3 -34  -1   -0.40    3.40
   3 -34   1    2.90    5.10
   3 -34   1   -3.00    4.50
  -3 -34  -1    6.60    4.90
   3  34   1    8.30    5.10
  -3  34  -1    8.90    3.80
   3  34   1   -2.00    5.10
  -3  34  -1   -1.20    5.20
  -3 -35   1    7.90    4.20
   3 -35  -1    7.10    4.50
  -3 -35   1    5.60    3.30
   3 -35  -1    9.20    5.80
   3  35  -1    4.70    3.80
  -3  35   1    9.50    5.60
  -3  35   1    7.90    5.00
   3  35  -1   13.30    6.50
  -2 -35   1    5.30    4.80
  -2 -35   1    0.40    3.50
   2 -35  -1   -3.00    3.40
   2 -35  -1   -4.10    4.20
  -2  35   1    0.30    3.60
   2  35  -1   -2.20    3.50
  -2  35   1   -0.90    3.90
  -1 -35   1    8.80    5.00
  -1 -35   1   12.10    3.80
   1 -35  -1   13.50    5.50
  -1  35   1    4.40    5.10
   1  35  -1    9.50    5.60
  -1  35   1    2.00    3.70
   0 -35   1   40.30    7.30
   0 -35  -1   31.60    6.70
   0 -35   1   32.50    4.80
   0  35  -1   27.10    6.60
   0  35  -1   34.20    5.40
   0  35   1   31.20    5.90
   1 -35   1    5.20    4.80
  -1 -35  -1   -0.20    4.20
   1  35   1    0.20    3.60
  -1  35  -1   -5.80    4.20
  -1  35  -1   -3.50    2.60
  -2 -35  -1   -1.40    4.10
   2 -35   1   -1.30    4.60
  -2  35  -1    4.90    4.40
  -2  35  -1   -6.40    4.20
   2  35   1    0.50    5.30
   2  35   1    0.40    4.00
  -2 -36   1    4.50    3.90
   2 -36  -1    6.50    5.20
  -2 -36   1    4.90    5.00
   2  36  -1   14.60    6.30
  -2  36   1    5.20    4.30
  -2  36   1    9.90    5.70
  -1 -36   1    3.90    4.70
   1 -36  -1   -0.10    4.50
  -1 -36   1   -0.90    3.20
   1  36  -1    0.60    3.80
  -1  36   1   -0.50    3.50
  -1  36   1   -3.00    3.50
   0 -36  -1    0.60    3.30
   0 -36   1    1.30    4.40
   0  36  -1   -3.70    4.80
   0  36  -1    1.80    2.90
   0  36   1   -0.90    5.00
   1 -36   1    7.30    5.10
  -1 -36  -1   -2.10    4.30
   1  36   1   -6.20    4.60
  -1  36  -1   -0.80    3.40
  -1  36  -1    3.00    4.10
   2 -36   1    5.10    5.10
  -2 -36  -1    6.20    5.10
   2  36   1    2.90    4.50
   2  36   1    1.20    5.40
  -2  36  -1    3.10    3.40
  -2  36  -1    9.40    5.30
  -1 -37   1    4.20    3.50
  -1 -37   1   -0.80    3.50
   1 -37  -1   -3.70    4.50
  -1  37   1   -5.60    4.70
  -1  37   1   -1.60    3.70
   1  37  -1   -2.10    5.30
   0 -37  -1    7.50    5.30
   0 -37   1    3.10    5.10
   0  37   1    9.40    4.50
   0  37  -1    1.40    4.10
   0  37  -1    3.10    5.20
  -1 -37  -1   -2.40    4.20
   1 -37   1   -1.80    3.50
  -1  37  -1    4.20    5.50
   1  37   1   -1.20    3.70
  -1  37  -1   -2.40    3.80
  -8   0   2   41.00    7.20
   8   0  -2   45.10    6.50
   8   0  -2   41.80    7.70
  -8   0   2   50.79    6.30
   7   0  -2   62.59    7.90
   7   0  -2   75.09    6.00
   7   0  -2   74.49    6.30
  -7   0   2   76.29    6.10
  -7   0   2   75.79    6.40
  -7   0   2   63.29    7.30
   7   0  -2   69.49    7.00
  -7   0   2   65.09    5.60
  -7   0   2   76.39    6.40
   6   0  -2   34.70    4.00
   6   0  -2   28.20    3.90
  -6   0   2   27.90    5.10
  -6   0   2   25.30    4.10
  -6   0   2   32.80    4.00
   6   0  -2   27.50    4.50
   6   0  -2   32.90    5.40
  -6   0   2   31.00    4.30
   6   0  -2   30.50    4.00
   6   0  -2   31.50    3.90
  -6   0   2   34.20    4.00
  -6   0   2   33.00    4.20
  -6   0   2   24.50    3.70
   6   0  -2   33.20    4.40
  -5   0   2    5.60    2.30
  -5   0   2    6.10    2.00
   5   0  -2    3.20    2.40
   5   0  -2    4.30    2.30
   5   0  -2    2.70    2.30
  -5   0   2    4.30    2.00
  -5   0   2   -0.90    2.10
   5   0  -2    1.40    2.30
  -5   0   2    4.90    2.20
   5   0  -2    2.10    2.80
  -5   0   2   -0.30    2.20
   5   0  -2    7.20    2.20
  -5   0   2    5.40    2.10
   5   0  -2    4.70    2.40
   5   0  -2    6.90    2.30
   5   0  -2    6.00    2.20
  -5   0   2   10.50    2.30
  -5   0   2    3.80    2.70
   4   0  -2    3.90    1.80
   4   0  -2    4.50    1.80
  -4   0   2    5.20    1.60
   4   0  -2    6.60    1.90
  -4   0   2    2.10    1.90
  -4   0   2    4.00    1.60
  -4   0   2    2.40    1.60
   4   0  -2    1.40    1.70
   4   0  -2    3.10    1.60
  -4   0   2    4.80    1.70
  -4   0   2    3.30    1.70
  -4   0   2    7.60    1.80
   4   0  -2    5.20    1.70
   4   0  -2    6.50    1.80
  -4   0   2    6.70    1.80
   4   0  -2    8.30    2.10
   4   0  -2    0.70    2.00
  -4   0   2    4.70    1.60
  -3   0   2   50.09    2.90
   3   0  -2   50.29    3.10
   3   0  -2   52.89    3.20
   3   0  -2   49.99    3.10
  -3   0   2   44.40    3.30
  -3   0   2   46.50    3.00
  -3   0   2   46.50    2.90
   3   0  -2   47.90    3.50
  -3   0   2   47.40    3.00
   3   0  -2   53.69    3.10
   3   0  -2   49.80    3.00
   3   0  -2   44.30    3.00
   3   0  -2   47.40    3.50
   3   0  -2   48.10    3.00
   2   0  -2  503.25   16.90
   2   0  -2  495.65   16.70
   2   0  -2  496.45   16.80
   2   0  -2  504.95   16.80
   2   0  -2  508.25   17.00
  -2   0   2  497.65   16.70
   2   0  -2  499.55   16.70
  -2   0   2  503.95   16.90
  -2   0   2  449.95   16.60
   2   0  -2  473.05   17.00
  -2   0   2  482.25   16.70
   2   0  -2  511.75   16.80
   2   0  -2  492.45   17.30
   1   0  -2 7544.95  276.47
   1   0  -2 9544.54  277.67
   1   0  -2 9392.86  277.37
   1   0  -2 9063.09  277.77
   1   0  -2 8593.94  277.27
   1   0  -2 7428.46  275.67
   0   0   2   51.29    2.10
  -1   0  -2 5899.41  190.18
   1   0   2 6171.18  189.88
   1   0   2 6175.98  189.68
  -1   0  -2 5358.26  189.58
   1   0   2 5928.51  189.78
   1   0   2 5463.75  189.78
   1   0   2 6106.39  190.88
  -1   0  -2 6168.08  189.78
   2   0   2 2298.77   75.39
  -2   0  -2 2337.87   75.19
  -2   0  -2 2354.96   74.89
   2   0   2 2296.47   74.69
  -2   0  -2 2326.57   74.39
   2   0   2 2302.47   75.09
   2   0   2 2376.16   75.19
  -2   0  -2 2247.88   75.89
   2   0   2 2292.37   75.29
   2   0   2 2243.28   75.89
   3   0   2  106.19    5.20
  -3   0  -2  110.59    5.00
   3   0   2  102.69    4.20
   3   0   2  109.09    6.10
   3   0   2  104.89    5.50
  -3   0  -2  109.59    4.30
   3   0   2  108.49    4.80
   3   0   2  112.99    5.30
  -3   0  -2  101.69    4.20
   3   0   2  111.69    5.50
  -3   0  -2  102.89    5.10
  -3   0  -2  106.19    6.00
   4   0   2   45.30    4.20
   4   0   2   38.90    4.20
   4   0   2   40.10    3.30
   4   0   2   47.00    3.20
  -4   0  -2   36.50    4.00
   4   0   2   39.80    3.90
  -4   0  -2   48.00    3.80
  -4   0  -2   46.60    2.70
   4   0   2   40.10    3.50
  -4   0  -2   41.60    3.20
   5   0   2   41.50    4.40
   5   0   2   41.30    4.30
  -5   0  -2   33.70    5.50
   5   0   2   30.00    5.40
  -5   0  -2   39.10    3.70
   5   0   2   33.80    4.40
   5   0   2   33.50    4.40
  -5   0  -2   31.80    3.50
   6   0   2   63.39    6.20
  -6   0  -2   75.69    6.10
  -6   0  -2   64.29    5.10
   6   0   2   88.09    8.20
  -6   0  -2   78.49    7.60
   6   0   2   80.39    6.50
   6   0   2   67.89    5.90
   6   0   2   59.19    5.80
   7   0   2   73.89    7.10
   7   0   2   70.79    6.40
   7   0   2   57.19    6.80
  -7   0  -2   72.79    6.50
  -7   0  -2   62.99    7.20
   7   0   2   67.39    7.50
  -8  -1   2    4.40    3.80
   8  -1  -2    3.20    4.10
   8  -1  -2    9.60    6.40
  -8  -1   2    1.90    4.20
   8   1  -2    9.40    5.20
   8   1  -2   -3.40    3.80
  -8   1   2    8.00    4.90
  -8   1   2    2.00    3.60
  -7  -1   2   14.20    4.60
  -7  -1   2    5.10    3.00
  -7  -1   2    3.70    3.40
   7  -1  -2   17.80    5.10
   7  -1  -2    5.00    3.30
   7  -1  -2    5.00    3.60
   7  -1  -2    1.00    3.20
  -7  -1   2    6.90    3.10
   7   1  -2   28.30    5.60
  -7   1   2   12.10    3.70
   7   1  -2    4.60    3.00
   7   1  -2    0.60    2.90
  -7   1   2    5.50    3.20
  -7   1   2    2.90    2.90
  -7   1   2    3.30    3.10
   7   1  -2   -4.30    3.10
  -6  -1   2   57.09    6.70
   6  -1  -2   55.79    5.60
   6  -1  -2   66.09    5.50
  -6  -1   2   66.09    5.30
  -6  -1   2   61.39    4.90
   6  -1  -2   68.09    4.90
  -6  -1   2   62.69    5.20
   6  -1  -2   65.59    5.50
  -6  -1   2   54.59    5.30
  -6  -1   2   68.99    4.90
  -6  -1   2   54.19    4.80
   6  -1  -2   71.09    5.30
   6  -1  -2   66.69    6.90
   6  -1  -2   59.19    4.80
   6   1  -2   63.09    5.10
   6   1  -2   59.79    5.30
  -6   1   2   62.09    5.20
  -6   1   2   65.89    5.50
  -6   1   2   59.19    5.00
  -6   1   2   60.49    6.80
   6   1  -2   66.89    6.90
   6   1  -2   70.59    5.50
  -6   1   2   57.99    4.90
  -6   1   2   60.49    5.20
  -6   1   2   55.99    5.10
   6   1  -2   56.99    5.00
  -6   1   2   64.69    4.80
   6   1  -2   56.29    5.80
   6   1  -2   59.89    4.90
   5  -1  -2   54.09    4.00
   5  -1  -2   46.20    4.30
  -5  -1   2   48.50    3.80
  -5  -1   2   56.19    3.90
   5  -1  -2   46.90    3.90
  -5  -1   2   45.80    3.90
   5  -1  -2   47.00    4.40
   5  -1  -2   51.19    4.20
  -5  -1   2   44.00    4.20
   5  -1  -2   58.19    5.40
  -5  -1   2   52.49    5.10
   5  -1  -2   49.30    3.90
   5  -1  -2   43.30    4.20
  -5  -1   2   45.50    4.10
  -5  -1   2   47.10    4.30
   5  -1  -2   46.10    4.30
  -5  -1   2   44.80    4.10
  -5   1   2   47.20    3.80
  -5   1   2   42.70    4.10
   5   1  -2   45.20    5.10
   5   1  -2   51.09    4.60
  -5   1   2   53.79    4.00
   5   1  -2   50.99    4.10
  -5   1   2   47.90    4.20
   5   1  -2   50.99    4.30
   5   1  -2   51.19    4.10
  -5   1   2   45.40    4.90
   5   1  -2   52.49    4.20
   5   1  -2   46.10    4.20
  -5   1   2   43.10    4.10
   5   1  -2   50.19    4.80
   5   1  -2   47.40    3.80
  -5   1   2   41.30    4.10
  -5   1   2   48.00    4.00
  -5   1   2   48.20    4.30
  -4  -1   2   -0.70    1.40
   4  -1  -2   -1.70    1.40
   4  -1  -2   -1.60    1.30
   4  -1  -2    0.10    1.50
  -4  -1   2   -2.60    1.60
   4  -1  -2   -0.90    1.50
   4  -1  -2   -0.80    1.50
  -4  -1   2   -0.70    1.30
   4  -1  -2   -0.90    1.40
  -4  -1   2    0.70    1.40
  -4  -1   2   -1.60    1.10
   4  -1  -2   -1.60    1.90
   4  -1  -2    1.80    1.80
   4  -1  -2    0.00    1.40
  -4  -1   2   -0.40    1.10
  -4  -1   2   -1.40    1.20
   4   1  -2    0.00    1.20
   4   1  -2    0.70    1.50
  -4   1   2   -2.70    1.40
   4   1  -2   -2.00    1.60
   4   1  -2   -1.30    1.30
   4   1  -2   -0.50    1.40
  -4   1   2    0.30    1.40
  -4   1   2   -0.50    1.20
  -4   1   2   -2.30    1.30
   4   1  -2   -3.00    1.30
  -4   1   2   -1.30    1.30
  -4   1   2   -0.70    1.50
  -4   1   2   -0.70    1.20
   4   1  -2   -1.80    1.80
   4   1  -2   -1.60    1.20
  -4   1   2   -2.80    1.60
   4   1  -2   -1.90    1.50
  -4   1   2    1.00    1.30
  -3  -1   2  166.58    6.80
   3  -1  -2  155.38    7.20
  -3  -1   2  167.58    6.60
   3  -1  -2  165.08    6.80
   3  -1  -2  160.18    6.60
   3  -1  -2  161.78    7.20
  -3  -1   2  157.48    7.10
   3  -1  -2  159.98    6.80
   3  -1  -2  159.08    6.80
   3  -1  -2  163.68    6.70
  -3  -1   2  171.18    6.70
   3  -1  -2  164.18    6.80
  -3  -1   2  166.28    6.70
   3  -1  -2  166.28    6.80
   3   1  -2  168.48    6.90
   3   1  -2  168.58    6.90
   3   1  -2  167.78    6.70
   3   1  -2  167.78    6.70
  -3   1   2  166.48    6.80
   3   1  -2  163.18    6.80
   3   1  -2  157.78    6.70
  -3   1   2  172.68    6.60
   3   1  -2  160.68    7.30
  -3   1   2  161.28    6.50
   3   1  -2  164.88    7.30
   3   1  -2  162.38    6.60
  -3   1   2  165.88    7.20
  -3   1   2  163.58    6.60
  -2  -1   2  241.48   10.00
   2  -1  -2  284.47   10.50
   2  -1  -2  283.07   10.00
  -2  -1   2  287.47    9.90
   2  -1  -2  280.17   10.20
   2  -1  -2  284.57    9.90
  -2  -1   2  261.97    9.90
   2  -1  -2  284.47   10.00
   2  -1  -2  283.17    9.90
  -2  -1   2  290.87   10.00
  -2  -1   2  291.77   10.20
   2  -1  -2  275.17   10.30
   2  -1  -2  285.27   10.20
   2  -1  -2  300.87   10.10
   2   1  -2  292.97   10.20
   2   1  -2  286.17   10.10
  -2   1   2  284.47   10.00
   2   1  -2  287.27   10.60
  -2   1   2  284.97   10.40
  -2   1   2  247.28    9.70
   2   1  -2  266.47   10.20
  -2   1   2  261.17    9.80
   2   1  -2  286.87    9.90
   2   1  -2  286.57   10.00
  -2   1   2  284.37   10.00
   2   1  -2  285.37   10.00
   2   1  -2  292.87   10.00
   2   1  -2  296.97    9.90
   1  -1  -2    1.20    0.70
  -1  -1   2    0.20    0.70
   1  -1  -2    4.10    0.90
   1  -1  -2    3.60    0.90
  -1  -1   2    0.20    0.40
   1  -1  -2    0.90    1.10
   1   1  -2    1.20    1.10
  -1   1   2    0.50    0.50
   1   1  -2    2.20    0.80
   1   1  -2    0.70    0.70
  -1   1   2    1.00    0.80
  -1   1   2    2.30    1.10
   1   1  -2    1.80    0.80
   0  -1  -2  274.37    9.10
   0  -1   2  286.97    9.10
   0   1   2  249.97    9.10
   0   1  -2  275.87    9.10
   0   1  -2  298.87    9.20
   0   1   2  284.67    9.30
   0   1   2  224.28    9.10
  -1  -1  -2  276.27    9.80
  -1  -1  -2  268.17   10.20
   1  -1   2  282.97   10.00
   1   1   2  245.78    9.90
   1   1   2  300.07    9.90
   1   1   2  309.77    9.70
   1   1   2  289.37   10.00
  -2  -1  -2  204.18    7.40
  -2  -1  -2  209.88    7.70
  -2  -1  -2  188.48    6.80
  -2  -1  -2  198.78    8.40
   2   1   2  205.88    8.50
   2   1   2  185.78    7.80
   2   1   2  194.18    7.30
   2   1   2  182.68    7.80
   2   1   2  197.58    7.70
   2   1   2  206.68    7.80
  -3  -1  -2  210.38    7.60
  -3  -1  -2  211.18    9.80
   3  -1   2  217.98    8.80
  -3  -1  -2  226.68    8.40
   3  -1   2  213.58    9.00
   3  -1   2  218.78    9.00
   3  -1   2  211.48    8.60
   3  -1   2  215.88    9.90
  -3  -1  -2  221.98    8.70
   3  -1   2  217.58    7.60
   3  -1   2  215.58    8.10
   3   1   2  204.48    9.00
  -3   1  -2  212.78    8.70
  -3   1  -2  223.38    7.90
   3   1   2  210.68    8.30
   3   1   2  216.48    9.90
   3   1   2  210.88    8.70
   3   1   2  217.98    7.80
  -3   1  -2  216.88    8.40
  -3   1  -2  217.98    7.60
   3   1   2  222.18    8.80
  -3   1  -2  204.98    9.70
   3   1   2  204.48    8.80
   4  -1   2   13.40    2.50
  -4  -1  -2    9.30    2.70
  -4  -1  -2   10.50    2.00
   4  -1   2   13.70    2.50
   4  -1   2   14.90    2.10
   4  -1   2   11.00    2.70
  -4  -1  -2   12.00    2.40
   4  -1   2   11.40    2.30
   4  -1   2    8.90    2.80
  -4   1  -2   14.00    1.70
   4   1   2   13.60    2.60
   4   1   2    9.50    2.90
   4   1   2   12.30    2.10
  -4   1  -2   11.20    3.30
  -4   1  -2    9.70    1.80
   4   1   2   12.60    2.50
   4   1   2    9.40    2.30
  -4   1  -2   14.80    2.40
   4   1   2   15.20    2.70
   5  -1   2   15.60    4.50
  -5  -1  -2   22.80    3.50
   5  -1   2   13.50    3.50
  -5  -1  -2   13.70    4.20
  -5  -1  -2   18.20    2.80
   5  -1   2   18.50    3.60
   5  -1   2   20.80    4.20
   5  -1   2   17.00    2.90
   5   1   2   13.40    3.20
  -5   1  -2   15.40    4.40
   5   1   2   20.60    2.90
  -5   1  -2   17.80    2.80
  -5   1  -2   19.20    3.40
   5   1   2   16.20    4.50
   5   1   2   25.70    3.90
   5   1   2   14.70    2.80
   5   1   2   12.60    3.10
  -6  -1  -2   38.60    4.90
   6  -1   2   36.50    4.70
   6  -1   2   39.10    5.20
   6  -1   2   34.10    4.90
  -6  -1  -2   32.50    4.70
   6  -1   2   30.50    4.90
  -6  -1  -2   64.79    7.00
  -6   1  -2   32.40    4.10
   6   1   2   35.40    4.80
   6   1   2   31.40    4.80
   6   1   2   34.90    5.10
  -6   1  -2   38.00    5.00
   6   1   2   29.20    4.80
   7  -1   2   15.50    5.70
  -7  -1  -2   19.50    4.30
   7  -1   2   16.50    4.10
   7  -1   2   16.70    4.50
  -7  -1  -2   15.40    4.00
   7  -1   2   19.10    4.10
  -7  -1  -2   23.80    5.50
   7   1   2   21.70    5.60
   7   1   2   22.10    4.60
  -7   1  -2   36.20    6.90
  -7   1  -2   19.20    4.60
   7   1   2   18.00    4.40
  -8  -2   2   -0.90    2.60
   8  -2  -2    1.40    4.30
  -8  -2   2    7.90    4.70
  -8   2   2    1.40    3.20
   8   2  -2   -1.90    3.70
  -8   2   2   -5.00    3.00
   8   2  -2    3.90    4.80
  -8   2   2    4.40    4.50
   7  -2  -2    0.30    3.90
  -7  -2   2    2.70    4.00
   7  -2  -2    3.90    3.50
  -7  -2   2    0.60    3.20
   7  -2  -2    0.20    3.10
  -7  -2   2    3.60    3.30
  -7  -2   2    5.00    2.90
   7  -2  -2    0.70    3.20
   7   2  -2   -1.90    3.40
   7   2  -2    4.80    4.30
  -7   2   2    0.80    2.90
   7   2  -2    4.80    3.20
  -7   2   2    0.70    3.60
  -7   2   2    4.70    3.10
  -7   2   2   -3.00    2.70
  -6  -2   2   12.20    3.10
  -6  -2   2   13.00    3.50
  -6  -2   2   13.60    2.80
   6  -2  -2   13.10    3.00
   6  -2  -2   14.80    3.20
  -6  -2   2   14.70    3.20
   6  -2  -2   13.10    3.40
   6  -2  -2   15.90    4.40
   6  -2  -2   18.00    3.70
  -6  -2   2   10.10    3.30
   6  -2  -2   13.90    3.50
  -6  -2   2   16.70    4.50
   6  -2  -2   16.60    3.70
  -6   2   2   13.70    3.30
   6   2  -2   18.80    3.50
   6   2  -2   11.00    3.50
  -6   2   2   10.10    2.80
  -6   2   2    9.90    3.00
   6   2  -2   11.10    4.30
  -6   2   2   12.60    3.40
  -6   2   2    9.60    2.90
  -6   2   2   11.00    3.30
   6   2  -2   13.10    3.20
  -6   2   2    4.60    3.60
   6   2  -2   11.80    2.60
   6   2  -2   10.20    3.50
  -5  -2   2   12.00    2.40
   5  -2  -2    7.30    2.60
   5  -2  -2    5.20    2.50
  -5  -2   2    9.40    2.20
  -5  -2   2   10.80    2.70
  -5  -2   2    7.00    3.00
   5  -2  -2    8.90    2.20
   5  -2  -2    5.70    3.00
  -5  -2   2    7.00    2.10
  -5  -2   2    2.40    2.20
   5  -2  -2    8.80    2.30
   5  -2  -2    9.40    2.50
   5  -2  -2    9.30    2.60
  -5  -2   2    5.60    2.20
   5  -2  -2    9.60    2.60
   5  -2  -2    7.20    2.60
   5   2  -2    5.20    2.30
   5   2  -2    4.40    2.30
   5   2  -2    9.10    2.50
   5   2  -2    7.20    2.60
   5   2  -2    8.90    2.20
   5   2  -2    9.60    2.10
  -5   2   2    6.00    2.50
  -5   2   2    7.90    2.30
  -5   2   2    7.30    2.40
  -5   2   2    7.90    2.40
   5   2  -2    5.00    2.30
  -5   2   2    6.60    2.50
  -5   2   2    7.00    2.10
  -5   2   2    8.00    3.20
  -5   2   2    6.70    2.50
   5   2  -2    7.90    3.20
   5   2  -2    4.90    2.70
  -5   2   2    2.80    2.30
  -4  -2   2    5.10    1.70
   4  -2  -2    5.40    1.70
   4  -2  -2    4.60    1.80
  -4  -2   2    3.90    1.60
   4  -2  -2    3.10    1.70
   4  -2  -2    3.40    1.40
  -4  -2   2    5.60    1.90
  -4  -2   2    3.90    1.60
   4  -2  -2    4.20    1.80
   4  -2  -2    4.20    2.00
   4  -2  -2    5.30    1.90
   4  -2  -2    6.40    1.80
  -4  -2   2    3.30    1.30
  -4  -2   2    2.80    2.00
   4  -2  -2    2.50    2.10
   4   2  -2    3.40    1.60
  -4   2   2    5.00    1.50
  -4   2   2    5.70    1.90
  -4   2   2    2.30    1.50
   4   2  -2    2.10    1.60
   4   2  -2    4.40    2.20
  -4   2   2    6.10    1.80
   4   2  -2    1.70    1.60
  -4   2   2   -0.90    1.50
  -4   2   2    4.80    2.00
   4   2  -2    2.80    1.80
   4   2  -2    5.40    2.00
   4   2  -2    2.20    1.50
  -4   2   2    5.00    1.50
   4   2  -2    3.00    2.00
   4   2  -2    5.70    2.00
   3  -2  -2   -2.40    1.20
  -3  -2   2    0.30    1.40
   3  -2  -2    0.50    1.10
   3  -2  -2   -0.30    1.20
   3  -2  -2   -0.50    1.20
   3  -2  -2   -0.40    1.10
  -3  -2   2    1.00    1.20
   3  -2  -2   -1.60    1.10
  -3  -2   2   -0.30    1.00
  -3  -2   2   -1.30    0.90
   3  -2  -2   -0.80    1.00
   3  -2  -2    0.10    1.50
  -3  -2   2   -1.10    1.10
   3  -2  -2    0.60    1.10
   3   2  -2    1.10    1.30
   3   2  -2   -2.10    1.10
   3   2  -2    0.70    1.20
   3   2  -2   -0.70    1.20
  -3   2   2   -1.60    1.00
  -3   2   2   -0.50    1.00
  -3   2   2   -0.50    1.20
   3   2  -2    0.40    1.00
  -3   2   2   -0.20    0.90
   3   2  -2   -0.10    1.40
   3   2  -2   -0.20    0.90
   3   2  -2    0.20    1.00
  -3   2   2   -2.00    1.20
   3   2  -2   -1.60    1.30
   2  -2  -2   -0.70    1.00
   2  -2  -2    0.10    0.80
   2  -2  -2    0.70    0.80
   2  -2  -2    1.00    0.90
   2  -2  -2    2.50    1.30
   2  -2  -2   -0.20    1.00
   2  -2  -2    1.20    1.00
  -2  -2   2    0.30    0.70
  -2  -2   2    1.50    1.00
   2  -2  -2    0.20    1.00
  -2  -2   2    1.10    0.70
   2  -2  -2   -0.10    1.00
   2   2  -2   -0.10    0.70
   2   2  -2   -0.20    0.70
  -2   2   2   -0.10    1.00
   2   2  -2   -1.50    1.10
   2   2  -2    1.30    1.10
  -2   2   2    0.70    0.70
   2   2  -2    1.50    0.80
  -2   2   2    1.20    1.00
   2   2  -2   -0.10    0.70
   2   2  -2    0.30    1.40
  -2   2   2   -0.90    0.90
   2   2  -2   -0.10    0.90
   2   2  -2   -0.40    1.00
   1  -2  -2   14.90    1.30
   1  -2  -2   15.70    1.20
  -1  -2   2   13.60    1.20
   1  -2  -2    9.80    1.50
   1  -2  -2   12.50    1.10
   1  -2  -2   11.00    1.30
   1   2  -2   12.70    0.80
   1   2  -2   12.00    1.20
  -1   2   2   16.80    1.20
   1   2  -2   11.40    1.20
   1   2  -2   13.90    1.30
  -1   2   2   12.50    1.60
   1   2  -2   11.00    1.10
   1   2  -2   12.00    1.60
   0  -2   2   86.69    3.20
   0  -2  -2   80.39    3.20
   0   2  -2   83.39    3.20
   0   2   2   86.29    3.30
   0   2  -2   82.29    3.10
   0   2   2   84.19    3.30
   0   2  -2   84.89    3.20
   0   2   2   80.99    3.20
  -1  -2  -2    7.70    1.00
   1  -2   2    9.90    1.60
  -1  -2  -2    9.90    1.80
  -1  -2  -2   12.40    1.40
   1  -2   2   11.70    1.10
   1  -2   2   18.10    1.50
   1   2   2   11.50    1.30
   1   2   2   11.50    1.20
   1   2   2   11.60    1.40
  -1   2  -2   13.50    1.30
   1   2   2   12.30    1.40
   1   2   2    8.00    1.60
  -2  -2  -2  168.28    5.90
   2  -2   2  167.88    7.00
   2  -2   2  181.68    7.00
  -2  -2  -2  164.98    7.40
   2  -2   2  180.28    6.80
  -2  -2  -2  176.18    6.90
  -2  -2  -2  179.98    6.50
   2  -2   2  175.58    6.30
   2  -2   2  173.68    7.10
   2  -2   2  176.28    7.60
   2   2   2  166.58    6.10
  -2   2  -2  181.38    6.30
   2   2   2  171.58    7.00
   2   2   2  166.18    7.00
  -2   2  -2  175.88    6.80
   2   2   2  167.18    6.60
  -2   2  -2  172.58    6.90
   2   2   2  161.78    6.80
   2   2   2  166.88    7.50
  -3  -2  -2   89.79    5.60
   3  -2   2  104.69    5.30
   3  -2   2  109.09    4.50
   3  -2   2  107.99    5.40
   3  -2   2  104.89    5.00
  -3  -2  -2   98.59    4.90
   3  -2   2  105.39    6.30
  -3  -2  -2  100.49    4.00
   3  -2   2  109.29    5.50
   3  -2   2  111.79    4.00
  -3  -2  -2  102.79    4.70
  -3   2  -2  121.99    4.60
  -3   2  -2  112.79    5.00
   3   2   2  101.19    5.10
   3   2   2   98.99    5.40
  -3   2  -2  115.29    5.50
   3   2   2   99.69    5.30
   3   2   2   95.59    5.20
  -3   2  -2  105.79    4.00
   3   2   2  100.99    4.80
   3   2   2   96.79    4.30
   3   2   2   96.29    5.80
  -4  -2  -2    5.70    1.70
   4  -2   2    9.30    2.60
   4  -2   2    6.60    3.10
  -4  -2  -2    3.90    2.30
   4  -2   2    8.30    2.50
  -4  -2  -2    6.10    1.80
   4  -2   2    7.80    2.10
   4  -2   2    8.80    1.70
   4  -2   2    9.10    2.60
  -4   2  -2    9.20    1.80
  -4   2  -2    5.40    2.90
  -4   2  -2    9.70    1.60
   4   2   2    5.10    1.80
   4   2   2    7.30    2.00
   4   2   2    7.20    2.60
   4   2   2    8.10    2.20
   4   2   2    4.30    2.20
  -4   2  -2    5.20    2.20
   4   2   2    8.30    2.40
   5  -2   2    4.80    2.50
   5  -2   2    6.50    3.30
  -5  -2  -2    4.60    2.00
   5  -2   2    6.20    3.30
   5  -2   2    3.80    2.30
   5  -2   2    6.60    3.10
  -5  -2  -2    6.20    2.60
  -5  -2  -2    1.90    3.40
  -5   2  -2    2.90    2.90
   5   2   2    4.60    2.70
   5   2   2    6.10    2.20
   5   2   2    1.20    3.60
  -5   2  -2    7.10    2.80
   5   2   2    0.80    2.40
   5   2   2   -0.80    2.80
   5   2   2    3.80    2.50
  -5   2  -2    6.60    2.40
   6  -2   2    1.10    2.60
   6  -2   2    4.20    2.80
   6  -2   2    4.40    3.30
   6  -2   2   10.60    3.80
  -6  -2  -2    6.10    2.50
   6  -2   2    4.90    2.70
  -6  -2  -2   18.90    4.90
   6   2   2    2.90    3.20
  -6   2  -2    7.80    3.40
  -6   2  -2    6.30    3.40
   6   2   2    5.10    2.70
   6   2   2    5.50    2.60
   6   2   2    5.30    3.00
   6   2   2   19.00    5.00
  -6   2  -2    2.30    2.60
   7  -2   2   14.60    5.60
  -7  -2  -2   11.60    4.30
   7  -2   2    7.00    4.10
  -7  -2  -2   18.60    5.80
   7  -2   2    2.80    3.20
  -7  -2  -2   15.10    4.00
   7  -2   2    6.40    4.20
   7   2   2    4.10    3.20
  -7   2  -2    1.80    3.50
   7   2   2   14.40    5.60
  -7   2  -2   14.70    5.40
   7   2   2    4.30    3.60
  -8  -3   2   -2.90    3.10
   8  -3  -2    2.50    3.70
  -8  -3   2    0.50    3.50
  -8  -3   2   -0.10    4.00
   8  -3  -2   16.40    5.70
  -8   3   2    7.50    4.60
   8   3  -2   -0.60    4.30
   8   3  -2   -3.60    3.60
  -8   3   2    8.00    3.70
   8   3  -2    6.00    4.00
   7  -3  -2    4.50    3.50
   7  -3  -2    4.10    3.10
   7  -3  -2    4.80    3.60
  -7  -3   2    0.20    2.90
   7  -3  -2    6.10    4.30
  -7  -3   2    3.20    4.00
  -7  -3   2    5.70    3.10
   7  -3  -2   -0.10    3.00
  -7   3   2    5.10    2.90
   7   3  -2    3.40    4.20
  -7   3   2    3.10    2.40
  -7   3   2   -0.80    3.00
  -7   3   2    1.50    3.70
   7   3  -2    4.30    3.70
  -7   3   2    5.10    3.20
   7   3  -2    4.50    3.20
  -6  -3   2   49.99    5.30
  -6  -3   2   47.40    4.60
  -6  -3   2   49.20    4.60
  -6  -3   2   47.00    4.20
   6  -3  -2   52.39    5.40
   6  -3  -2   54.59    6.60
   6  -3  -2   43.70    4.90
   6  -3  -2   47.20    5.30
   6  -3  -2   52.89    5.00
   6  -3  -2   51.39    4.40
   6  -3  -2   53.29    5.40
  -6  -3   2   43.70    6.10
  -6   3   2   52.39    5.20
   6   3  -2   49.60    6.60
  -6   3   2   47.10    5.10
   6   3  -2   43.10    4.80
   6   3  -2   45.40    4.90
  -6   3   2   47.50    4.20
   6   3  -2   50.39    4.30
  -6   3   2   46.60    4.50
   6   3  -2   51.39    5.70
   6   3  -2   51.39    4.80
  -6   3   2   48.40    6.20
  -6   3   2   48.60    4.80
  -6   3   2   50.59    5.30
   5  -3  -2  108.19    6.30
   5  -3  -2  116.19    7.40
   5  -3  -2  111.89    6.40
  -5  -3   2  105.59    5.90
  -5  -3   2   94.79    5.30
  -5  -3   2   93.39    5.70
  -5  -3   2   92.39    5.50
   5  -3  -2  106.39    6.10
  -5  -3   2  105.39    5.50
   5  -3  -2  107.49    5.70
   5  -3  -2  109.19    6.00
   5  -3  -2  112.29    6.20
  -5  -3   2  100.09    5.70
   5  -3  -2  105.79    6.40
   5  -3  -2  111.49    5.60
  -5  -3   2  112.19    7.00
   5   3  -2  106.79    5.50
   5   3  -2   89.69    5.70
  -5   3   2  102.39    6.10
  -5   3   2  100.19    6.90
   5   3  -2  104.99    7.10
  -5   3   2  112.19    6.30
   5   3  -2  101.69    6.40
   5   3  -2   99.09    5.70
   5   3  -2   96.69    5.80
   5   3  -2  100.79    5.60
  -5   3   2  103.59    5.90
  -5   3   2  109.69    5.50
  -5   3   2  112.29    6.40
  -5   3   2   95.59    5.40
   5   3  -2  100.99    6.00
   5   3  -2  103.39    5.80
  -5   3   2  111.39    6.00
   4  -3  -2   -2.00    1.30
  -4  -3   2    1.40    1.40
   4  -3  -2   -1.00    1.40
   4  -3  -2   -2.20    1.50
   4  -3  -2   -0.90    1.10
   4  -3  -2    0.80    1.70
  -4  -3   2   -1.50    1.50
   4  -3  -2    0.20    1.30
   4  -3  -2   -0.90    1.50
  -4  -3   2    0.30    1.10
  -4  -3   2   -1.20    1.20
  -4  -3   2    0.20    1.10
  -4  -3   2   -3.10    1.70
   4  -3  -2   -1.30    1.00
   4  -3  -2   -1.50    1.90
  -4   3   2   -0.40    1.20
  -4   3   2    0.70    1.30
   4   3  -2   -2.30    1.30
  -4   3   2    1.70    1.20
  -4   3   2    0.40    1.20
   4   3  -2   -0.80    1.30
   4   3  -2    0.40    1.70
   4   3  -2    1.20    1.80
   4   3  -2   -0.90    1.90
  -4   3   2   -0.40    1.60
   4   3  -2   -0.80    1.80
   4   3  -2   -0.30    1.10
  -4   3   2   -2.10    0.90
   4   3  -2    0.80    1.40
   4   3  -2   -0.30    1.10
   3  -3  -2   -0.90    1.30
   3  -3  -2    1.60    1.20
   3  -3  -2    0.50    1.10
  -3  -3   2   -0.90    1.00
   3  -3  -2    1.20    1.10
  -3  -3   2   -0.40    1.30
   3  -3  -2    3.30    1.50
   3  -3  -2   -0.60    1.20
  -3  -3   2    0.70    1.10
   3  -3  -2    2.30    1.40
   3  -3  -2   -1.40    1.40
  -3  -3   2    0.20    1.20
   3  -3  -2    1.30    1.60
  -3  -3   2    0.50    1.40
   3   3  -2   -0.20    1.40
   3   3  -2    1.60    1.30
   3   3  -2    1.00    1.20
   3   3  -2    2.20    1.60
   3   3  -2   -1.10    1.10
   3   3  -2   -0.60    1.40
  -3   3   2    1.80    1.00
   3   3  -2    0.40    1.00
  -3   3   2    1.20    1.10
   3   3  -2   -1.20    1.40
  -3   3   2   -2.60    1.30
   3   3  -2    0.10    1.20
  -3   3   2   -0.50    1.10
  -3   3   2    0.80    1.20
   2  -3  -2  449.76   16.00
   2  -3  -2  443.96   15.80
  -2  -3   2  457.75   15.20
   2  -3  -2  464.35   15.50
   2  -3  -2  460.95   15.70
   2  -3  -2  451.35   15.30
  -2  -3   2  455.35   15.50
   2  -3  -2  462.15   15.80
  -2  -3   2  451.75   15.60
   2  -3  -2  441.56   15.20
   2  -3  -2  458.85   15.60
  -2  -3   2  430.36   15.10
  -2  -3   2  425.46   15.60
   2  -3  -2  453.15   15.80
  -2   3   2  473.65   16.10
   2   3  -2  447.26   15.80
   2   3  -2  460.35   15.20
   2   3  -2  459.75   15.30
   2   3  -2  448.16   16.10
   2   3  -2  458.95   15.20
  -2   3   2  430.96   15.20
   2   3  -2  457.75   15.60
   2   3  -2  460.15   15.70
   2   3  -2  441.56   15.70
  -2   3   2  457.65   15.60
   2   3  -2  457.15   15.60
  -2   3   2  472.05   15.50
  -2   3   2  461.35   15.80
  -1  -3   2 2131.19   64.99
  -1  -3   2 1976.90   64.79
   1  -3  -2 1713.43   64.89
   1  -3  -2 2172.18   64.89
   1  -3  -2 1915.71   64.99
   1  -3  -2 1882.81   65.09
   1  -3  -2 2196.08   64.79
  -1   3   2 2080.99   64.89
   1   3  -2 1850.51   65.19
   1   3  -2 1710.93   64.89
   1   3  -2 2156.68   64.99
   1   3  -2 1916.31   64.89
   1   3  -2 2157.98   64.69
  -1   3   2 2221.38   65.29
  -1  -3  -2    2.60    0.80
   1  -3   2    3.00    0.90
   1  -3   2    2.70    0.90
   1  -3   2    0.60    1.30
   1  -3   2    3.30    0.60
  -1  -3  -2    2.80    0.70
   1  -3   2    1.50    1.20
   1  -3   2    2.80    0.90
  -1   3  -2    4.20    0.80
   1   3   2    4.70    1.10
  -1   3  -2    2.30    1.10
   1   3   2    3.90    0.70
   1   3   2    2.40    0.90
   1   3   2    4.10    0.90
   1   3   2    1.20    1.00
   1   3   2    4.80    1.00
   2  -3   2   98.19    5.30
  -2  -3  -2   88.89    5.10
   2  -3   2   98.49    4.80
   2  -3   2  100.69    4.60
  -2  -3  -2   94.09    4.30
   2  -3   2  100.79    3.80
   2  -3   2  108.09    4.80
   2  -3   2   91.79    4.10
  -2  -3  -2   97.59    4.00
   2   3   2   91.79    4.40
   2   3   2   94.99    4.30
   2   3   2   96.59    3.80
   2   3   2   93.59    5.20
   2   3   2   96.09    4.60
   2   3   2   94.29    4.50
  -2   3  -2   95.29    4.00
  -2   3  -2   94.49    4.60
  -2   3  -2  104.59    4.50
   3  -3   2   24.80    3.20
   3  -3   2   24.10    1.90
   3  -3   2   22.30    2.60
  -3  -3  -2   15.60    3.10
  -3  -3  -2   18.90    1.30
  -3  -3  -2   21.10    2.10
   3  -3   2   22.50    2.80
   3  -3   2   20.50    2.60
  -3  -3  -2   21.70    2.50
   3  -3   2   20.20    2.30
   3   3   2   21.40    2.40
  -3   3  -2   20.60    1.40
   3   3   2   16.40    2.50
  -3   3  -2   20.00    2.60
  -3   3  -2   21.40    2.10
   3   3   2   21.50    2.70
  -3   3  -2   20.30    1.80
   3   3   2   24.30    3.50
   3   3   2   20.80    2.60
   3   3   2   19.30    1.80
   4  -3   2   28.60    3.20
   4  -3   2   27.60    4.40
  -4  -3  -2   26.30    4.20
   4  -3   2   24.20    3.20
   4  -3   2   29.30    3.40
   4  -3   2   32.70    3.60
   4  -3   2   29.50    2.50
  -4  -3  -2   27.80    2.60
  -4  -3  -2   35.60    3.30
   4   3   2   28.60    3.70
   4   3   2   31.30    3.20
   4   3   2   29.50    3.50
  -4   3  -2   26.80    2.30
   4   3   2   32.60    3.50
  -4   3  -2   27.60    3.30
  -4   3  -2   33.10    3.20
   4   3   2   37.10    3.70
   4   3   2   29.40    4.40
  -5  -3  -2    9.60    2.40
   5  -3   2    4.10    3.90
   5  -3   2    9.90    2.70
  -5  -3  -2   13.00    3.50
   5  -3   2    9.90    2.80
  -5  -3  -2   13.60    2.60
   5  -3   2    7.20    2.70
   5  -3   2   12.20    2.90
  -5   3  -2    6.00    4.00
  -5   3  -2   11.00    2.70
  -5   3  -2    9.90    2.70
   5   3   2   10.30    2.60
   5   3   2    8.80    2.90
   5   3   2   10.00    3.40
   5   3   2    8.50    2.50
   5   3   2    2.80    3.20
   5   3   2   12.00    2.60
   6  -3   2   36.40    6.30
   6  -3   2   34.10    5.20
   6  -3   2   42.30    5.30
   6  -3   2   35.90    4.60
  -6  -3  -2   43.20    6.50
   6  -3   2   25.80    4.80
  -6  -3  -2   33.70    4.60
   6   3   2   41.50    6.70
   6   3   2   37.70    5.10
  -6   3  -2   36.30    5.10
   6   3   2   37.30    5.20
  -6   3  -2   38.40    4.60
  -6   3  -2   38.40    6.30
  -6   3  -2   33.00    4.70
   6   3   2   35.80    5.60
  -7  -3  -2    9.60    3.70
  -7  -3  -2   16.20    4.80
   7  -3   2    8.10    4.10
   7  -3   2   14.00    5.80
  -7  -3  -2   14.30    5.60
   7  -3   2   10.80    4.50
  -7   3  -2   16.40    4.40
  -7   3  -2   10.60    5.30
   7   3   2   18.40    4.50
  -7   3  -2    7.60    4.00
   7   3   2    9.90    5.50
   7   3   2    8.60    4.70
  -8  -4   2   22.10    5.90
  -8  -4   2   17.60    4.80
   8  -4  -2   18.50    4.90
   8  -4  -2   33.40    6.80
  -8  -4   2   23.60    4.90
   8   4  -2   23.50    6.50
  -8   4   2   22.50    5.90
  -8   4   2   30.50    5.30
   8   4  -2   27.10    5.30
   8   4  -2   18.50    5.30
   7  -4  -2   86.69    8.20
   7  -4  -2   77.79    6.90
   7  -4  -2   94.39    7.20
  -7  -4   2   74.79    6.10
  -7  -4   2   72.79    7.50
  -7  -4   2   82.09    6.40
   7  -4  -2   85.49    6.70
  -7  -4   2   82.19    6.10
   7  -4  -2   75.59    6.70
  -7   4   2   79.69    6.60
   7   4  -2   76.69    8.00
   7   4  -2   73.79    6.30
  -7   4   2   77.99    6.40
  -7   4   2   80.39    7.80
   7   4  -2   69.29    6.20
   7   4  -2   80.49    6.70
  -7   4   2   85.39    6.20
  -7   4   2   95.99    6.70
  -6  -4   2   62.99    5.20
   6  -4  -2   56.99    4.90
  -6  -4   2   56.69    6.50
  -6  -4   2   53.19    4.80
  -6  -4   2   54.79    4.80
   6  -4  -2   67.59    6.90
   6  -4  -2   60.59    5.50
  -6  -4   2   63.09    4.90
   6  -4  -2   65.49    5.70
   6  -4  -2   49.40    4.70
   6  -4  -2   63.79    5.40
   6   4  -2   50.79    4.50
  -6   4   2   56.89    5.40
  -6   4   2   57.39    5.30
  -6   4   2   61.39    5.30
   6   4  -2   59.59    5.10
   6   4  -2   58.79    6.90
  -6   4   2   47.80    4.70
  -6   4   2   62.19    5.00
  -6   4   2   55.29    6.40
   6   4  -2   57.69    5.20
  -6   4   2   57.99    5.10
   6   4  -2   52.39    5.00
   5  -4  -2  132.59    8.10
   5  -4  -2  149.19    7.50
  -5  -4   2  138.19    6.40
  -5  -4   2  120.59    6.90
  -5  -4   2  134.59    7.20
  -5  -4   2  143.89    6.70
  -5  -4   2  125.59    6.60
  -5  -4   2  134.89    7.90
   5  -4  -2  136.89    7.30
   5  -4  -2  139.09    7.20
  -5  -4   2  128.79    6.30
   5  -4  -2  125.09    6.80
   5  -4  -2  139.29    6.50
   5  -4  -2  126.19    7.00
   5  -4  -2  121.99    6.50
   5  -4  -2  133.19    6.50
  -5   4   2  131.89    6.40
  -5   4   2  136.29    7.10
   5   4  -2  132.09    7.10
   5   4  -2  124.59    6.70
  -5   4   2  133.29    6.90
  -5   4   2  134.29    7.30
   5   4  -2  128.49    6.40
   5   4  -2  144.19    7.60
  -5   4   2  134.19    7.10
   5   4  -2  136.79    7.50
   5   4  -2  134.49    7.10
   5   4  -2  138.79    8.20
  -5   4   2  131.29    6.80
  -5   4   2  133.89    6.30
   5   4  -2  128.39    6.40
   5   4  -2  136.69    6.80
   4  -4  -2   -0.40    1.50
   4  -4  -2    1.40    1.80
   4  -4  -2    2.10    1.40
   4  -4  -2    2.30    1.60
  -4  -4   2   -0.70    1.20
   4  -4  -2    1.80    1.40
   4  -4  -2    0.80    1.30
  -4  -4   2    0.50    1.90
   4  -4  -2    2.40    1.80
  -4  -4   2    0.00    1.40
  -4  -4   2   -0.30    1.30
  -4  -4   2    2.50    1.60
  -4  -4   2    2.70    1.40
   4  -4  -2    0.40    2.00
   4  -4  -2   -1.50    1.20
   4   4  -2   -0.50    1.30
  -4   4   2    2.90    1.20
   4   4  -2   -1.40    1.30
  -4   4   2    1.80    1.70
   4   4  -2   -0.80    1.20
   4   4  -2   -1.40    1.30
   4   4  -2    0.20    1.60
   4   4  -2   -0.70    1.30
  -4   4   2   -1.20    1.50
   4   4  -2   -0.20    1.90
  -4   4   2   -1.80    1.10
   4   4  -2    1.40    1.70
  -4   4   2   -2.00    1.30
  -4   4   2    0.50    1.10
   4   4  -2   -0.20    1.40
   3  -4  -2   72.59    3.90
  -3  -4   2   75.09    4.00
   3  -4  -2   68.29    3.50
   3  -4  -2   67.79    3.60
   3  -4  -2   66.19    4.30
   3  -4  -2   74.19    3.60
  -3  -4   2   66.29    3.50
  -3  -4   2   73.09    3.40
  -3  -4   2   68.99    3.90
   3  -4  -2   70.59    4.10
   3  -4  -2   73.89    4.20
   3  -4  -2   70.89    3.90
  -3  -4   2   68.29    4.10
   3  -4  -2   73.19    3.90
  -3   4   2   79.89    4.00
   3   4  -2   75.19    4.00
  -3   4   2   78.39    3.60
   3   4  -2   64.89    3.90
   3   4  -2   66.19    4.30
   3   4  -2   66.49    3.70
  -3   4   2   70.69    4.10
  -3   4   2   76.89    4.10
   3   4  -2   68.89    3.40
   3   4  -2   68.79    4.00
   3   4  -2   71.49    4.20
  -3   4   2   73.69    3.40
   3   4  -2   71.19    3.60
   3   4  -2   73.39    3.50
   2  -4  -2  216.08    8.50
  -2  -4   2  205.78    7.50
  -2  -4   2  214.58    8.10
   2  -4  -2  214.98    8.30
   2  -4  -2  223.38    8.40
   2  -4  -2  219.08    7.90
   2  -4  -2  214.68    8.40
  -2  -4   2  214.08    8.10
  -2  -4   2  213.28    8.10
   2  -4  -2  217.68    7.70
  -2  -4   2  210.78    7.60
   2  -4  -2  217.48    7.60
   2  -4  -2  221.08    8.20
   2  -4  -2  223.38    8.20
  -2   4   2  215.28    7.60
   2   4  -2  215.28    7.60
   2   4  -2  216.68    8.00
  -2   4   2  224.78    8.50
   2   4  -2  219.68    8.40
  -2   4   2  215.38    8.10
  -2   4   2  224.68    8.30
   2   4  -2  225.08    8.20
   2   4  -2  220.88    8.20
   2   4  -2  212.78    8.10
  -2   4   2  229.08    7.90
   2   4  -2  224.38    7.70
   2   4  -2  210.78    8.50
   2   4  -2  209.68    7.60
   1  -4  -2 1061.89   32.50
   1  -4  -2  984.90   32.70
   1  -4  -2  948.21   32.50
   1  -4  -2 1048.60   32.50
   1  -4  -2  895.71   32.50
  -1  -4   2 1017.70   32.40
   1   4  -2  897.71   32.50
   1   4  -2  990.90   32.90
   1   4  -2  996.90   32.40
  -1   4   2 1042.10   32.80
  -1   4   2  988.50   32.40
   1   4  -2 1014.10   32.10
   1   4  -2  975.40   32.40
   0  -4   2 2521.55   78.69
   0  -4  -2 2485.35   78.79
   0  -4  -2 2509.15   78.69
   0  -4   2 2467.35   78.59
   0   4  -2 2368.96   78.59
   0   4  -2 2459.25   78.59
   0   4  -2 2438.06   78.69
   0   4   2 2469.35   78.89
   0   4   2 2478.05   78.79
   0   4  -2 2263.97   78.79
   0   4   2 2422.86   78.79
   1  -4   2 4395.76  138.19
   1  -4   2 4275.77  138.69
   1  -4   2 4279.87  138.09
  -1  -4  -2 4309.37  137.99
   1  -4   2 4302.97  137.89
   1  -4   2 4236.88  138.19
  -1  -4  -2 4229.78  138.39
   1   4   2 4323.37  138.09
   1   4   2 4127.69  138.19
   1   4   2 4314.07  138.59
  -1   4  -2 4377.96  138.09
   1   4   2 4226.18  138.69
   1   4   2 4395.06  138.09
   1   4   2 4287.37  138.09
  -1   4  -2 4239.08  138.09
  -1   4  -2 4307.87  137.89
   2  -4   2  288.57   11.10
  -2  -4  -2  293.87   10.60
   2  -4   2  291.77   11.00
   2  -4   2  287.97    9.90
   2  -4   2  309.37   11.00
  -2  -4  -2  297.57   10.20
  -2  -4  -2  285.57   11.40
   2  -4   2  288.07   11.60
   2  -4   2  278.77   10.40
   2   4   2  292.17   10.80
   2   4   2  289.57   10.60
   2   4   2  284.57   10.20
   2   4   2  299.17   11.10
  -2   4  -2  295.87   10.90
  -2   4  -2  301.67   10.80
   2   4   2  283.07   10.80
   2   4   2  288.47   11.50
  -2   4  -2  292.07   10.30
  -3  -4  -2   15.60    1.10
  -3  -4  -2   17.50    2.30
   3  -4   2   15.70    2.30
   3  -4   2   18.30    2.70
   3  -4   2   19.00    2.50
   3  -4   2   17.10    2.00
   3  -4   2   17.90    1.70
   3  -4   2   16.40    2.80
  -3  -4  -2   20.80    2.00
  -3  -4  -2   19.50    3.20
   3   4   2   22.70    2.50
   3   4   2   20.50    2.60
   3   4   2   18.40    1.80
   3   4   2   16.60    2.00
  -3   4  -2   20.10    1.90
   3   4   2   17.30    2.40
  -3   4  -2   16.60    1.40
  -3   4  -2   17.50    2.30
  -3   4  -2   19.60    2.40
   3   4   2   18.20    3.10
  -4  -4  -2  100.69    4.80
   4  -4   2   97.19    5.70
  -4  -4  -2   98.49    6.70
   4  -4   2   97.49    5.30
   4  -4   2   87.89    6.80
  -4  -4  -2  112.19    5.70
   4  -4   2  108.49    6.20
   4  -4   2   94.49    6.00
   4   4   2   98.19    5.50
  -4   4  -2  105.69    5.70
  -4   4  -2  102.89    5.60
   4   4   2  102.09    6.90
  -4   4  -2  104.29    4.80
   4   4   2   96.49    5.80
   4   4   2  103.89    5.90
   4   4   2   99.79    5.40
   5  -4   2   45.70    4.60
  -5  -4  -2   51.89    3.70
   5  -4   2   42.60    4.90
  -5  -4  -2   55.69    6.00
   5  -4   2   48.80    6.50
  -5  -4  -2   52.79    4.50
   5  -4   2   43.90    4.40
   5  -4   2   46.40    4.50
   5   4   2   42.80    4.10
   5   4   2   54.59    6.60
   5   4   2   49.10    5.10
   5   4   2   50.89    4.70
  -5   4  -2   42.70    6.10
  -5   4  -2   46.40    4.30
   5   4   2   46.40    5.00
  -5   4  -2   43.90    4.70
   6  -4   2    9.10    4.50
   6  -4   2   -0.10    2.40
  -6  -4  -2    8.90    3.30
  -6  -4  -2    2.50    3.10
   6  -4   2    2.80    2.60
   6  -4   2    4.90    3.60
   6  -4   2   -2.10    3.00
  -6  -4  -2    3.30    3.40
   6   4   2    1.60    2.80
  -6   4  -2    3.60    3.80
   6   4   2   -2.60    3.10
   6   4   2    2.00    3.20
   6   4   2   -4.30    2.70
  -6   4  -2    4.00    3.40
  -6   4  -2    0.50    2.70
  -6   4  -2    3.70    3.30
  -7  -4  -2    3.10    4.80
   7  -4   2    2.60    4.90
  -7  -4  -2    0.60    3.90
   7  -4   2   -2.10    3.70
  -7  -4  -2   -2.30    2.80
   7  -4   2    1.90    3.70
   7   4   2   -2.20    4.40
  -7   4  -2    8.10    5.00
  -7   4  -2    6.20    3.80
   7   4   2    2.60    3.40
  -7   4  -2   -0.60    2.90
   7   4   2    3.60    4.30
   8  -5  -2    9.10    5.10
  -8  -5   2    9.40    4.30
  -8  -5   2    6.70    3.90
  -8  -5   2    3.90    4.60
   8  -5  -2    4.30    3.20
   8   5  -2    3.10    3.80
  -8   5   2    8.70    4.10
   8   5  -2   -1.50    4.70
   8   5  -2   -0.40    4.00
  -8   5   2   12.00    4.90
  -7  -5   2    2.70    2.60
   7  -5  -2    0.10    2.30
   7  -5  -2    8.10    3.50
  -7  -5   2    4.30    4.10
   7  -5  -2    4.60    3.50
  -7  -5   2    4.60    3.20
   7  -5  -2    2.40    2.70
   7  -5  -2    1.70    3.10
  -7   5   2    0.50    3.70
  -7   5   2    0.80    2.70
   7   5  -2    4.20    4.30
   7   5  -2    2.90    3.20
  -7   5   2    1.90    3.10
  -7   5   2    1.00    2.30
   7   5  -2    2.90    3.30
  -7   5   2    0.10    3.00
   7   5  -2    1.10    2.90
   6  -5  -2  119.99    7.50
  -6  -5   2  134.89    7.50
  -6  -5   2  139.49    7.30
   6  -5  -2  117.09    7.70
  -6  -5   2  114.49    8.50
   6  -5  -2  118.79    7.20
   6  -5  -2  126.19    7.60
   6  -5  -2  135.19    7.40
  -6  -5   2  123.49    7.40
   6  -5  -2  139.39    9.20
  -6   5   2  121.29    7.70
   6   5  -2  130.89    7.70
   6   5  -2  139.69    9.20
   6   5  -2  143.99    8.30
  -6   5   2  126.19    7.20
   6   5  -2  115.59    7.40
  -6   5   2  128.59    7.50
  -6   5   2  119.39    7.60
   6   5  -2  116.79    7.00
  -6   5   2  117.19    8.60
  -5  -5   2   52.09    4.80
  -5  -5   2   54.09    3.80
   5  -5  -2   54.39    4.70
   5  -5  -2   51.99    4.50
  -5  -5   2   49.50    5.10
   5  -5  -2   46.60    3.60
   5  -5  -2   56.69    4.80
  -5  -5   2   41.90    3.70
   5  -5  -2   41.40    3.50
   5  -5  -2   43.50    4.30
   5  -5  -2   42.00    3.80
  -5  -5   2   42.90    4.20
  -5  -5   2   49.80    4.50
   5  -5  -2   55.69    5.40
   5  -5  -2   47.80    4.30
   5   5  -2   50.39    4.50
   5   5  -2   50.99    4.40
  -5   5   2   52.09    4.40
   5   5  -2   48.00    4.40
   5   5  -2   40.70    3.80
  -5   5   2   56.09    4.50
   5   5  -2   45.60    3.90
   5   5  -2   45.10    4.80
   5   5  -2   48.30    4.70
  -5   5   2   46.30    4.50
  -5   5   2   50.29    3.60
  -5   5   2   47.00    3.90
  -5   5   2   45.20    4.30
  -5   5   2   44.20    3.50
   5   5  -2   56.19    5.50
   4  -5  -2  149.99    8.10
   4  -5  -2  166.08    7.40
  -4  -5   2  158.68    7.40
   4  -5  -2  153.98    6.70
  -4  -5   2  163.38    6.80
   4  -5  -2  163.08    7.50
  -4  -5   2  153.48    7.20
   4  -5  -2  160.38    7.20
   4  -5  -2  163.18    7.50
  -4  -5   2  163.28    6.90
   4  -5  -2  159.98    7.50
  -4  -5   2  155.38    7.80
   4  -5  -2  157.18    7.10
   4  -5  -2  159.18    6.80
  -4  -5   2  157.88    6.60
   4   5  -2  159.68    7.00
  -4   5   2  154.18    7.20
  -4   5   2  160.98    6.60
   4   5  -2  156.98    7.80
   4   5  -2  171.68    7.00
  -4   5   2  160.68    7.20
   4   5  -2  168.08    7.70
   4   5  -2  162.58    6.70
   4   5  -2  165.08    7.50
   4   5  -2  159.98    8.00
   4   5  -2  159.88    7.50
   4   5  -2  154.68    6.90
  -4   5   2  159.58    7.40
  -4   5   2  164.58    7.40
  -4   5   2  163.08    6.70
   3  -5  -2    8.20    2.00
   3  -5  -2    5.70    1.50
  -3  -5   2    5.60    1.40
   3  -5  -2    6.50    1.80
  -3  -5   2    6.40    1.50
  -3  -5   2    6.80    1.40
   3  -5  -2    8.60    2.00
   3  -5  -2    5.70    1.50
   3  -5  -2    6.30    1.40
   3  -5  -2    8.30    1.30
  -3  -5   2    5.90    1.20
   3  -5  -2    5.90    1.80
  -3  -5   2    6.80    1.70
   3  -5  -2    5.40    2.00
  -3   5   2    6.50    1.50
   3   5  -2    7.40    1.40
   3   5  -2    6.20    1.30
  -3   5   2    6.20    1.90
  -3   5   2    6.90    1.20
  -3   5   2    7.00    1.80
   3   5  -2    7.90    1.60
   3   5  -2    3.30    1.40
   3   5  -2    6.00    1.80
   3   5  -2    5.90    1.90
   3   5  -2    5.70    1.30
  -3   5   2    6.10    1.50
   3   5  -2    5.00    1.90
   3   5  -2    7.40    1.60
  -2  -5   2  177.78    6.30
  -2  -5   2  174.58    6.30
   2  -5  -2  174.68    7.20
   2  -5  -2  183.38    6.70
   2  -5  -2  175.98    7.10
  -2  -5   2  180.48    7.00
   2  -5  -2  179.98    6.30
   2  -5  -2  176.08    7.20
  -2  -5   2  167.08    6.50
   2  -5  -2  181.48    7.20
  -2  -5   2  184.68    7.00
   2  -5  -2  184.98    7.10
  -2  -5   2  181.38    6.90
   2  -5  -2  180.28    7.10
   2  -5  -2  179.08    6.50
   2   5  -2  179.28    7.40
   2   5  -2  177.48    7.00
  -2   5   2  175.18    7.00
  -2   5   2  190.08    7.30
  -2   5   2  178.08    7.20
   2   5  -2  174.88    6.80
   2   5  -2  175.38    7.20
   2   5  -2  176.88    6.30
   2   5  -2  189.08    7.10
  -2   5   2  186.88    6.30
   2   5  -2  177.48    6.30
   2   5  -2  176.98    6.40
  -2   5   2  186.38    6.60
   1  -5  -2 1046.00   34.70
  -1  -5   2 1068.19   34.50
   1  -5  -2 1082.69   34.50
   1  -5  -2 1076.39   34.60
  -1  -5   2 1011.30   34.40
   1  -5  -2 1038.10   34.70
   1  -5  -2 1057.19   34.80
   1   5  -2 1040.20   34.70
   1   5  -2 1047.20   34.10
  -1   5   2 1080.59   34.80
   1   5  -2 1052.19   34.90
   1   5  -2 1048.00   34.50
  -1   5   2 1069.19   34.70
   1   5  -2 1038.70   34.50
  -1   5   2 1038.50   34.50
   0  -5  -2  483.75   15.60
   0  -5  -2  472.55   15.70
   0  -5  -2  436.16   15.30
   0  -5   2  468.05   15.40
   0  -5   2  500.15   15.70
   0  -5   2  475.15   15.50
   0   5  -2  444.16   15.40
   0   5  -2  450.65   15.50
   0   5  -2  462.35   15.60
   0   5  -2  458.45   15.50
   0   5   2  455.45   15.60
   0   5   2  467.25   15.50
   0   5   2  465.05   15.70
   0   5   2  478.45   15.60
   1  -5   2  534.95   17.40
  -1  -5  -2  500.25   17.20
  -1  -5  -2  512.25   18.00
   1  -5   2  511.35   17.80
   1  -5   2  536.55   17.80
   1  -5   2  521.45   18.30
   1  -5   2  518.95   17.80
  -1  -5  -2  531.55   17.60
  -1   5  -2  494.65   17.20
   1   5   2  525.55   17.70
  -1   5  -2  521.95   17.60
   1   5   2  531.15   17.80
   1   5   2  514.45   17.50
  -1   5  -2  518.55   17.70
   1   5   2  537.75   17.70
   1   5   2  552.14   18.30
  -1   5  -2  528.65   17.70
   1   5   2  506.15   17.80
   2  -5   2  705.83   24.10
   2  -5   2  752.82   24.80
   2  -5   2  713.73   25.40
  -2  -5  -2  716.03   25.20
   2  -5   2  718.53   24.70
  -2  -5  -2  725.03   23.80
   2  -5   2  699.43   23.50
   2  -5   2  689.03   24.70
  -2  -5  -2  722.53   24.30
  -2   5  -2  736.23   24.60
  -2   5  -2  737.03   23.60
   2   5   2  733.23   25.30
   2   5   2  730.03   24.50
   2   5   2  727.03   24.60
  -2   5  -2  736.63   24.10
   2   5   2  718.23   24.40
   2   5   2  708.53   24.80
  -2   5  -2  722.83   24.70
   2   5   2  700.53   24.00
   3  -5   2  981.80   34.40
  -3  -5  -2  984.80   34.90
  -3  -5  -2 1009.20   33.20
   3  -5   2 1018.90   34.30
  -3  -5  -2 1016.80   33.80
   3  -5   2  995.40   32.80
   3  -5   2  987.00   34.30
   3  -5   2 1001.60   33.60
   3  -5   2  986.40   35.30
   3   5   2 1001.70   34.10
   3   5   2  989.70   34.10
   3   5   2  988.90   33.90
  -3   5  -2 1012.70   32.70
  -3   5  -2 1004.20   34.20
  -3   5  -2 1036.10   34.10
  -3   5  -2 1028.50   33.40
   3   5   2 1000.20   34.40
   3   5   2 1007.40   35.10
   3   5   2  978.80   33.30
   4  -5   2    3.30    2.40
   4  -5   2   -0.40    1.50
  -4  -5  -2    4.70    1.60
   4  -5   2   -0.10    1.50
   4  -5   2    2.70    2.30
  -4  -5  -2    0.50    1.30
  -4  -5  -2    3.20    2.70
   4  -5   2   -0.20    2.30
   4   5   2    3.40    2.00
   4   5   2    1.00    2.70
  -4   5  -2    6.10    1.70
  -4   5  -2   -1.10    2.00
   4   5   2    1.50    2.10
  -4   5  -2    4.20    1.60
   4   5   2    3.20    1.50
   4   5   2    2.40    2.40
  -5  -5  -2   44.80    5.50
   5  -5   2   39.20    5.00
   5  -5   2   40.30    4.70
   5  -5   2   36.70    4.10
   5  -5   2   41.90    4.70
  -5  -5  -2   42.90    3.70
   5  -5   2   39.50    6.10
   5   5   2   34.90    5.00
  -5   5  -2   38.10    5.40
  -5   5  -2   37.90    4.40
  -5   5  -2   45.00    4.30
   5   5   2   40.70    5.50
   5   5   2   44.80    4.20
   5   5   2   41.20    4.40
   5   5   2   45.00    4.80
  -6  -5  -2   -2.60    2.50
  -6  -5  -2    0.70    3.80
  -6  -5  -2   -0.10    3.30
   6  -5   2    0.90    3.40
   6  -5   2    4.60    2.70
   6  -5   2    3.80    4.20
   6  -5   2    1.40    3.40
   6  -5   2    1.90    2.50
   6   5   2   -2.60    3.90
   6   5   2    1.20    3.00
   6   5   2   -0.50    3.40
  -6   5  -2    6.60    4.10
  -6   5  -2   -4.60    3.00
  -6   5  -2   -1.90    2.50
  -6   5  -2    1.00    3.20
   6   5   2    4.50    3.10
  -7  -5  -2   24.30    6.30
   7  -5   2   19.90    5.10
  -7  -5  -2   25.70    4.50
   7  -5   2   26.20    6.70
   7  -5   2   23.50    4.60
  -7  -5  -2   29.70    5.50
  -7   5  -2   30.80    4.90
  -7   5  -2   34.90    6.90
   7   5   2   30.30    6.80
   7   5   2   28.30    5.90
   7   5   2   31.70    5.50
  -7   5  -2   26.90    4.70
  -8  -6   2   -1.40    4.20
  -8  -6   2   -5.70    3.60
  -8  -6   2   -0.30    3.40
   8  -6  -2    5.70    4.80
   8  -6  -2   -2.60    3.30
   8   6  -2   -3.40    3.50
  -8   6   2    2.30    3.50
  -8   6   2    6.90    4.50
   8   6  -2   -2.20    4.00
   8   6  -2  -10.10    4.10
  -7  -6   2   -2.10    2.30
  -7  -6   2    8.30    3.40
   7  -6  -2   -1.80    2.90
   7  -6  -2    3.60    4.10
   7  -6  -2    2.40    3.10
  -7  -6   2   -1.30    3.60
   7  -6  -2    3.10    3.40
  -7   6   2    0.10    3.70
  -7   6   2   -1.00    3.00
  -7   6   2    2.30    3.30
   7   6  -2    3.20    3.40
   7   6  -2    2.60    3.10
  -7   6   2   -2.40    2.70
  -7   6   2   -2.10    3.40
   7   6  -2   -0.50    2.60
   7   6  -2   -0.70    3.80
   6  -6  -2   52.89    4.90
  -6  -6   2   40.00    4.70
   6  -6  -2   35.10    4.50
  -6  -6   2   39.90    4.90
  -6  -6   2   54.59    6.30
   6  -6  -2   46.90    5.30
   6  -6  -2   38.40    4.70
   6  -6  -2   34.50    4.60
   6   6  -2   59.99    6.70
  -6   6   2   42.60    4.80
   6   6  -2   42.30    5.90
  -6   6   2   54.39    5.30
  -6   6   2   45.00    4.90
   6   6  -2   44.60    5.20
   6   6  -2   38.50    4.80
  -6   6   2   39.30    4.80
   6   6  -2   39.20    4.80
   5  -6  -2   62.19    4.60
  -5  -6   2   64.89    4.60
  -5  -6   2   55.09    4.40
  -5  -6   2   56.99    4.80
  -5  -6   2   55.49    4.40
   5  -6  -2   60.59    5.70
   5  -6  -2   51.69    4.00
   5  -6  -2   62.79    4.90
   5  -6  -2   69.79    5.30
  -5  -6   2   61.39    5.50
   5  -6  -2   67.09    5.20
   5  -6  -2   61.99    4.60
   5  -6  -2   71.39    5.00
   5   6  -2   53.19    4.50
  -5   6   2   64.19    5.10
   5   6  -2   64.59    5.80
   5   6  -2   59.09    4.60
   5   6  -2   67.19    5.10
  -5   6   2   67.19    4.60
  -5   6   2   65.79    4.30
  -5   6   2   55.09    4.80
  -5   6   2   61.59    4.10
  -5   6   2   67.49    4.90
  -5   6   2   64.09    4.80
   5   6  -2   52.69    5.10
   5   6  -2   51.79    4.50
   5   6  -2   57.39    4.90
   4  -6  -2  146.79    7.70
   4  -6  -2  151.98    6.50
   4  -6  -2  154.18    6.40
  -4  -6   2  158.88    6.50
  -4  -6   2  151.28    6.30
   4  -6  -2  152.28    7.20
   4  -6  -2  161.48    7.30
  -4  -6   2  148.39    7.10
  -4  -6   2  156.88    6.70
   4  -6  -2  155.88    7.50
   4  -6  -2  158.98    7.30
   4  -6  -2  149.99    6.90
   4  -6  -2  154.88    7.40
  -4  -6   2  144.99    7.00
  -4  -6   2  162.58    7.70
   4   6  -2  149.79    7.20
   4   6  -2  151.18    6.70
  -4   6   2  152.48    7.20
   4   6  -2  150.28    6.70
   4   6  -2  161.28    7.90
   4   6  -2  158.98    7.40
  -4   6   2  151.48    6.30
  -4   6   2  153.08    6.40
   4   6  -2  153.08    7.70
   4   6  -2  157.78    6.60
   4   6  -2  144.29    6.30
  -4   6   2  154.98    7.30
   4   6  -2  155.88    7.40
  -4   6   2  166.38    7.30
  -4   6   2  150.88    7.30
   3  -6  -2   47.00    3.40
   3  -6  -2   45.50    3.10
   3  -6  -2   44.60    3.30
   3  -6  -2   40.20    3.30
  -3  -6   2   44.20    3.00
  -3  -6   2   42.20    2.90
  -3  -6   2   45.70    2.50
   3  -6  -2   39.70    3.50
   3  -6  -2   45.20    2.50
   3  -6  -2   46.60    2.80
   3  -6  -2   43.50    3.10
  -3  -6   2   49.40    3.30
   3  -6  -2   46.80    2.70
   3   6  -2   40.70    3.10
   3   6  -2   43.20    2.80
   3   6  -2   46.70    3.40
  -3   6   2   43.50    3.40
   3   6  -2   41.60    3.30
  -3   6   2   45.40    2.60
  -3   6   2   48.30    3.40
   3   6  -2   44.50    3.60
  -3   6   2   42.30    2.40
   3   6  -2   43.80    3.10
   3   6  -2   44.30    2.60
  -3   6   2   42.80    3.00
   3   6  -2   47.00    2.60
   3   6  -2   45.70    2.70
   2  -6  -2    1.90    0.90
  -2  -6   2    1.20    0.60
   2  -6  -2    1.00    0.90
  -2  -6   2    2.90    1.20
  -2  -6   2    2.70    1.10
  -2  -6   2    2.90    1.30
   2  -6  -2    3.00    1.40
   2  -6  -2    2.70    1.50
   2  -6  -2    2.00    0.70
  -2  -6   2    1.20    0.60
   2  -6  -2    1.70    1.10
   2  -6  -2    1.90    1.30
   2  -6  -2    1.10    1.00
   2   6  -2    2.80    1.30
   2   6  -2    1.60    1.40
  -2   6   2    0.90    0.60
   2   6  -2    2.10    0.70
  -2   6   2    1.90    1.20
   2   6  -2    1.70    1.20
  -2   6   2    2.30    1.50
  -2   6   2    1.00    0.80
   2   6  -2    1.40    0.70
   2   6  -2   -0.30    1.00
   2   6  -2    2.70    1.20
  -2   6   2    2.40    1.30
   1  -6  -2   72.99    3.40
  -1  -6   2   71.69    3.20
   1  -6  -2   69.99    3.20
   1  -6  -2   74.09    3.30
  -1  -6   2   69.39    3.10
   1  -6  -2   70.69    3.30
  -1   6   2   68.59    3.20
   1   6  -2   70.59    2.70
   1   6  -2   71.69    3.50
  -1   6   2   73.79    3.50
   1   6  -2   69.99    3.10
  -1   6   2   73.59    3.50
  -1   6   2   69.39    2.90
   1   6  -2   73.09    3.20
   1   6  -2   69.39    3.40
   0  -6  -2 8854.71  281.77
   0  -6   2 9035.70  281.87
   0  -6  -2 8551.34  280.87
   0  -6  -2 8571.84  282.97
   0  -6   2 8489.85  280.97
   0  -6   2 7125.29  280.67
   0  -6   2 8873.31  281.77
   0   6   2 9035.60  281.67
   0   6   2 8852.61  279.47
   0   6   2 8622.24  281.37
   0   6  -2 8950.60  281.37
   0   6  -2 8985.70  281.37
   0   6  -2 8847.01  279.87
   0   6   2 8870.21  282.27
   0   6  -2 9091.79  281.37
   1  -6   2 1968.10   64.29
  -1  -6  -2 2004.70   63.69
   1  -6   2 1961.40   63.89
  -1  -6  -2 1976.90   63.99
  -1  -6  -2 1879.71   64.19
  -1  -6  -2 1951.90   64.59
   1  -6   2 1958.50   64.39
   1  -6   2 2003.90   64.79
   1  -6   2 2049.89   64.29
   1   6   2 1972.40   64.09
   1   6   2 1993.10   64.29
   1   6   2 2016.80   64.19
  -1   6  -2 1989.00   64.29
   1   6   2 2001.00   64.29
  -1   6  -2 1989.50   63.89
  -1   6  -2 1912.71   64.19
   1   6   2 1951.40   64.29
  -1   6  -2 1981.40   64.09
  -2  -6  -2    0.50    1.10
   2  -6   2   -0.40    1.40
  -2  -6  -2   -0.30    1.70
  -2  -6  -2    1.40    0.80
   2  -6   2    1.20    1.80
   2  -6   2   -0.40    1.50
   2  -6   2    0.50    1.00
   2  -6   2   -0.50    0.90
  -2   6  -2    1.30    0.70
  -2   6  -2    0.60    1.50
   2   6   2    0.50    1.00
   2   6   2    2.50    1.80
  -2   6  -2    0.70    1.30
  -2   6  -2    1.80    1.10
   2   6   2    3.70    1.40
   2   6   2    1.50    1.10
   2   6   2    1.70    1.20
   2   6   2    1.70    1.30
   3  -6   2    4.40    1.00
   3  -6   2    7.50    1.70
  -3  -6  -2    5.80    1.30
  -3  -6  -2    5.50    2.30
   3  -6   2    6.00    2.10
  -3  -6  -2   10.00    1.90
   3  -6   2    5.50    1.50
   3  -6   2    3.60    1.60
   3  -6   2    4.40    1.70
   3  -6   2    7.40    2.60
   3   6   2    6.30    1.80
   3   6   2    6.80    1.80
  -3   6  -2    7.60    1.60
  -3   6  -2    4.80    1.60
   3   6   2    8.70    2.60
   3   6   2    7.30    1.80
   3   6   2    5.50    1.30
   3   6   2    6.00    2.00
  -3   6  -2    6.20    1.10
  -3   6  -2    5.90    1.70
  -4  -6  -2   26.40    4.10
  -4  -6  -2   30.60    2.50
   4  -6   2   26.20    3.70
   4  -6   2   27.70    3.50
   4  -6   2   28.90    3.00
  -4  -6  -2   26.50    2.90
   4  -6   2   22.00    4.30
   4  -6   2   20.20    3.40
   4   6   2   28.00    3.60
  -4   6  -2   28.90    3.70
   4   6   2   25.60    3.30
  -4   6  -2   30.20    3.50
   4   6   2   24.20    4.20
  -4   6  -2   27.60    2.60
   4   6   2   26.10    3.30
   4   6   2   32.60    3.70
   5  -6   2    4.30    2.60
  -5  -6  -2    3.70    2.90
  -5  -6  -2    8.50    3.70
  -5  -6  -2    4.50    2.50
   5  -6   2    0.60    2.20
   5  -6   2    1.30    2.80
   5  -6   2    0.30    3.80
   5  -6   2    4.90    2.60
  -5   6  -2    6.70    2.80
   5   6   2    5.60    2.60
   5   6   2   -0.70    3.40
  -5   6  -2    3.90    2.00
   5   6   2    3.10    2.00
   5   6   2    3.50    3.00
  -5   6  -2    4.60    3.10
   5   6   2    5.30    3.10
  -5   6  -2    6.40    2.40
  -6  -6  -2   -9.70    2.70
   6  -6   2   -3.70    3.10
  -6  -6  -2   -2.10    3.70
  -6  -6  -2    0.40    2.50
   6  -6   2   -3.40    3.30
   6  -6   2   -0.60    2.30
   6  -6   2   -2.10    2.70
   6   6   2    0.20    2.60
  -6   6  -2    0.80    2.90
   6   6   2   -1.10    2.60
  -6   6  -2   -2.10    3.20
[truncated: 1,511,146 more chars]
